# Supplementary material for: Integrative omics reveals subtle molecular perturbations following ischemic conditioning in a porcine kidney transplant model
Source: Clin Proteomics. 2022 Feb 14;19:6. doi: 10.1186/s12014-022-09343-3 (PMC8903695; doi:10.1186/s12014-022-09343-3)
Supplement: Supplementary file 2 — Additional file 2: Table S1. Transcriptome sequence alignments. An average sequence alignment of 82% was achieved across all samples. Table S2. List of transcripts identified by transcriptomics. A total of 19,220 transcripts were successfully identified across groups. Table S3. Transcripts differentially expressed between RIC and Non-RIC groups. Table S4. qPCR validation on a panel of targets from discovery transcriptomics. IL1B, LTB4R, PDZD3, SLC16A3, and RASL10A were quantified by qPCR. We observed a slight increase in RIC induced SLC16A3 transcripts, but overall, none of the genes quantified reached statistically significance between RIC and non-RIC, with all having a p-value of > 0.2. Table S5. List of proteins identified by proteomics. A total of 7,546 proteins were successfully identified across groups. Table S6. Proteins differentially expressed between RIC and Non-RIC groups. Table S7. List of proteins and phosphosites identified by phosphoproteomics. A total of 3,524 phosphosites were successfully identified across groups. [file 12014_2022_9343_MOESM2_ESM.xlsx]

## Sheet:  Table S1
	TopHat2/align summary				Flagstat				TopHat2/align summary			Flagstat
	R1 mapped	R2 mapped	Overall	concordant alignment	properly paired				R1 mapped	R2 mapped	aligned pairs	mapped	properly paired
sample1	0.815	0.812	0.813	0.755	0.7734			sample1	27977126	27878306	26441731	63691388	49261792
sample2	0.819	0.817	0.818	0.761	0.7759			sample2	29489081	29436791	27915554	66937847	51933748
sample3	0.822	0.82	0.821	0.76	0.7806			sample3	28261370	28194791	26702826	66334381	51782272
sample4	0.818	0.817	0.818	0.757	0.7648			sample4	24295174	24262669	22957936	55655833	42567216
sample5	0.821	0.818	0.82	0.759	0.7665			sample5	30034679	29949556	28391426	68404690	52431022
sample6	0.819	0.817	0.818	0.756	0.7621			sample6	29238303	29179327	27606020	66784864	50896198
sample9	0.829	0.829	0.829	0.772	0.7799			sample9	33489509	33485501	31871075	77065874	60100638
sample10	0.821	0.819	0.82	0.765	0.7839			sample10	25174401	25099019	23914402	57079555	44744392
Average	0.8205	0.818625	0.819625	0.760625	0.773388			Average	2.8495e+07	28435745	2.69751e+07	65244304	5.04647e+07
SD	0.0040708	0.00480885	0.00450198	0.00557898	0.0081051
Values reported in Methods

## Sheet:  Table S2
C: Gene	BaseMean	log2FoldChange	lfcSE	pvalue	padj
HSPB1	-2.43195	-2.67694	0.596206	25.3605	21.0768
HSPB1	-2.68087	-2.15326	0.553223	13.857	9.8729
SLC16A3	-3.22566	-1.38676	0.724301	12.7033	8.8962
CH242-238L13.2	-2.66638	-1.49251	0.64305	10.2716	6.59007
CXCL13	-2.25569	-1.04291	0.698261	6.71444	3.12981
PDZD3	-3.34631	-1.18082	0.622366	6.12843	2.62253
VMO1	-2.06223	-1.0338	0.670466	5.88941	2.44931
	-1.83994	-1.31988	0.540805	5.34294	2.06438
CXCL8	-2.28949	-1.31293	0.540816	5.29328	2.06438
	-2.27336	-1.31282	0.541705	5.31158	2.06438
IL1R2	-1.93847	-1.30997	0.540681	5.26922	2.06438
IL1B	-2.42641	-1.28216	0.552966	5.33348	2.06438
ADM2	-2.56994	-1.15354	0.592435	5.1945	2.02464
SELL	-2.7484	-0.933669	0.676079	5.02319	1.88547
LTB4R	-1.56918	-1.19541	0.56381	4.92445	1.84305
	-3.35914	-1.10925	0.596516	4.92812	1.84305
TNFAIP6	-1.43999	-1.2569	0.540676	4.8962	1.84234
SLC30A2	-2.95426	-1.10843	0.589493	4.78252	1.75326
RASL10A	-2.14799	-1.0962	0.587186	4.64589	1.66205
BAIAP2L2	-3.29632	-1.04439	0.607063	4.62342	1.66205
SETBP1	-2.83457	0.81757	0.714081	4.63639	1.66205
A1CF	-2.39165	-1.11887	0.573134	4.54821	1.60756
	-3.13841	-0.993369	0.623593	4.52724	1.60464
CCL2	-3.69989	-1.14589	0.56008	4.49894	1.59607
UNC5D	-2.00178	1.15947	0.553901	4.48017	1.59444
FAM71A	-1.53356	-1.18181	0.541489	4.40561	1.54938
UPP2	-3.30365	-1.13154	0.560122	4.4023	1.54938
	-2.33366	0.773008	0.721198	4.32422	1.48748
	-2.60105	-1.03708	0.591926	4.29585	1.47411
	-2.31964	-1.15609	0.542802	4.26201	1.45532
ACTC1	-2.05208	-1.13797	0.544536	4.17457	1.38244
AKR1C3	-2.72627	-0.936407	0.624176	4.09152	1.31271
ENTPD8	-2.22489	-1.08678	0.554343	4.00745	1.25522
ADAM12	-2.35695	0.83849	0.66722	4.01144	1.25522
TMEM174	-3.31488	-0.972856	0.601583	3.99385	1.25416
DUSP2	-2.7076	-1.08353	0.552563	3.95836	1.24429
SLC2A3	-3.48698	-1.07809	0.554503	3.95447	1.24429
ETV5	-2.93175	-0.763991	0.703678	3.94826	1.24429
BLVRA	-3.10285	-0.675305	0.755784	3.92491	1.24321
C11orf95	-2.44726	0.861708	0.650295	3.93074	1.24321
ANKS4B	-3.34012	-0.900002	0.630252	3.91254	1.24157
AMT	-1.9917	-0.974856	0.594787	3.90054	1.24004
RFX2	-1.95878	-1.09598	0.540638	3.84964	1.20044
CHIT1	-1.55762	-1.08609	0.54212	3.8121	1.20044
BHMT	-3.17066	-1.00444	0.577064	3.82736	1.20044
CYP1A1	-2.78321	-0.988324	0.584803	3.83829	1.20044
FBN1	-3.40166	0.690198	0.739199	3.81493	1.20044
OSM	-2.1753	-1.08627	0.54112	3.79801	1.1955
SGK2	-2.58312	-1.05082	0.553513	3.76756	1.174
NOR-1	-2.20636	-0.977952	0.583413	3.74793	1.16892
	-2.50916	-0.805168	0.667654	3.74511	1.16892
NEIL1	-2.70379	-0.903281	0.616499	3.72697	1.15922
CH242-185F9.2	-2.45293	-1.0664	0.542826	3.70369	1.15652
EGR1	-2.84372	-1.06157	0.544047	3.69259	1.15652
	-2.49363	-0.991505	0.574332	3.70191	1.15652
HVCN1	-2.58564	-0.92528	0.603687	3.69209	1.15652
ASPDH	-2.85517	-0.866707	0.630496	3.66878	1.1409
SYCP3	-2.57375	-0.735456	0.699505	3.6353	1.1224
SEMA3E	-2.8697	0.75157	0.690283	3.63806	1.1224
RGS18	-2.30044	-0.88063	0.62035	3.62206	1.11646
SERPINH1	-3.95496	-0.896244	0.612034	3.61224	1.11382
SLC5A12	-4.27668	-0.923356	0.596292	3.57233	1.08792
ASXL2	-3.02922	0.704352	0.713976	3.57381	1.08792
MACROD1	-2.81331	-0.848477	0.63102	3.5441	1.07326
NCF1	-2.56018	-0.673217	0.731759	3.54767	1.07326
REM2	-2.20449	-1.03163	0.544641	3.5232	1.06552
NMRK1	-1.98059	-0.941919	0.584334	3.52571	1.06552
SLC16A9	-2.90852	-0.965592	0.570689	3.48594	1.04104
TSKU	-3.59071	-0.814883	0.644714	3.49046	1.04104
CSF3R	-3.01761	-0.976394	0.564935	3.47324	1.03459
	-1.5185	-1.02653	0.542379	3.46212	1.02963
	-2.19146	-0.786414	0.657364	3.45209	1.02844
ESPN	-3.1288	-0.758033	0.672749	3.44421	1.02844
SLC39A14	-2.58306	0.81434	0.64154	3.44296	1.02844
IL1R2	-1.58595	-0.999509	0.551272	3.4255	1.0223
SLC22A2	-3.53036	-0.71333	0.697749	3.42524	1.0223
MYH7B	-2.77767	-0.702209	0.703429	3.40979	1.01813
NIPSNAP1	-3.35955	-0.62269	0.756005	3.41493	1.01813
	-3.09334	-0.946802	0.56858	3.34244	0.977769
ADGRE1	-2.29785	-0.850915	0.615299	3.34701	0.977769
MSC	-2.3238	-0.827711	0.627281	3.34666	0.977769
ACMSD	-2.92094	-0.811776	0.636147	3.35227	0.977769
ENPEP	-3.44581	-0.785844	0.65079	3.35946	0.977769
CXCL2	-1.02735	-0.938827	0.570491	3.31932	0.959845
SMCO3	-2.29775	-0.967933	0.55478	3.28744	0.950423
	-3.22234	-0.758879	0.660248	3.28479	0.950423
AIG1	-2.58923	-0.672914	0.712472	3.28493	0.950423
SEMA5B	-3.00694	-0.639163	0.735564	3.29456	0.950423
	-2.58264	0.635122	0.73801	3.29057	0.950423
GPD1	-3.37157	-0.950473	0.560538	3.25979	0.935075
ETNK2	-2.69528	-0.943597	0.563974	3.26341	0.935075
	-3.34347	-0.921822	0.572537	3.24326	0.926103
SOGA1	-2.76364	0.612284	0.750083	3.24137	0.926103
ADGRV1	-2.88027	-0.955317	0.555195	3.21988	0.918402
AREG	-1.26419	-0.949953	0.557897	3.22312	0.918402
DHDH	-2.91508	-0.679129	0.703859	3.22581	0.918402
C1QTNF3	-1.58838	-0.981082	0.540658	3.18245	0.887783
	-1.4572	-0.976035	0.541934	3.17044	0.887783
BHMT-2	-4.33678	-0.885793	0.583991	3.1695	0.887783
	-2.44172	0.657916	0.712969	3.16722	0.887783
RAB11FIP2	-2.59325	0.688357	0.694073	3.17651	0.887783
NOX4	-3.20107	-0.910891	0.570307	3.1503	0.875148
	-2.38195	-0.9472	0.552393	3.13874	0.872984
ICAM-1	-2.95322	-0.882552	0.582743	3.13443	0.872984
	-3.18185	-0.779558	0.637038	3.13937	0.872984
ANKRD33	-3.17955	0.71238	0.675528	3.13143	0.872984
STARD10	-3.29348	-0.546838	0.789404	3.11948	0.865109
PALM3	-2.4388	-0.832953	0.605936	3.11087	0.860536
CBR4	-2.86153	-0.776973	0.634721	3.09353	0.847201
	-2.89176	0.805376	0.617583	3.07488	0.832524
ALOX5AP	-2.57798	-0.885164	0.575717	3.0648	0.830264
PCK1	-2.51721	0.922633	0.557849	3.06644	0.830264
SLC13A2	-3.26623	-0.848706	0.59263	3.04864	0.817961
CKS2	-2.97388	-0.772467	0.633105	3.04386	0.817007
SLC25A21	-2.20744	-0.754153	0.643034	3.03802	0.814963
FA2H	-3.41656	-0.814799	0.609092	3.03386	0.814563
SRGN	-3.50208	-0.732161	0.655111	3.02883	0.81326
NCALD	-2.4037	-0.922337	0.553827	3.01703	0.812456
HGD	-3.08763	-0.906891	0.561446	3.02038	0.812456
PHYH	-4.02386	-0.710026	0.667878	3.02216	0.812456
GPR4	-2.51132	-0.696073	0.675569	3.01124	0.812245
	-2.59113	-0.676566	0.687778	3.00964	0.812245
	-3.14462	-0.640046	0.711314	3.00304	0.809192
GAS2L2	-1.99949	-0.90375	0.560655	2.99343	0.808839
CSF3	-1.0915	-0.896804	0.564246	2.99624	0.808839
PTX3	-2.2919	-0.805373	0.610602	2.99222	0.808839
HSD17B14	-3.75375	-0.620811	0.722385	2.97762	0.797671
IER2	-3.37886	-0.770475	0.62763	2.96656	0.79002
PGC	-1.92083	-0.937116	0.540642	2.94409	0.776795
PTH1R	-3.77368	-0.795026	0.611266	2.93508	0.776795
CHRDL1	-2.40586	-0.748977	0.636752	2.93021	0.776795
RAB29	-3.059	-0.71929	0.654741	2.93505	0.776795
GRTP1	-2.70342	-0.611079	0.726445	2.94532	0.776795
	-2.63186	-0.569235	0.75612	2.93239	0.776795
TMEM252	-3.85954	0.850838	0.582153	2.93911	0.776795
SYTL3	-2.50579	-0.76033	0.628976	2.91609	0.76906
MGMT	-3.3113	-0.703418	0.662768	2.91613	0.76906
P4HTM	-2.92423	-0.801888	0.605511	2.91209	0.768216
	-0.940823	-0.857424	0.575642	2.90319	0.76427
	-3.11677	-0.669636	0.682884	2.9019	0.76427
	-3.1602	-0.913643	0.547362	2.89532	0.763853
SLC25A20	-3.03014	-0.792739	0.609167	2.8971	0.763853
UPB1	-3.78825	-0.905553	0.550893	2.89159	0.763172
LEAP2	-2.69497	-0.854813	0.575482	2.88651	0.761115
RGS16	-2.07897	-0.919008	0.543096	2.87602	0.760262
RGS1	-2.54797	-0.866418	0.569121	2.88085	0.760262
	-3.03071	-0.6126	0.719036	2.87375	0.760262
C6orf222	-2.87372	0.729879	0.643155	2.87591	0.760262
	-3.87234	-0.89503	0.553931	2.86881	0.758238
PKCNT1	-2.50461	-0.668407	0.680165	2.86254	0.757767
	-2.11272	0.782719	0.611829	2.86509	0.757767
PCP4L1	-1.54396	-0.868287	0.565868	2.85506	0.756002
MGAT5	-3.07713	0.536916	0.77479	2.85689	0.756002
NLRP12	-1.77631	-0.883679	0.557745	2.84963	0.753395
MTTP	-1.46159	-0.914674	0.542189	2.84318	0.752554
	-3.11624	-0.707693	0.65378	2.84505	0.752554
FMO3	-3.25056	-0.857446	0.569711	2.83726	0.74941
	-2.3292	-0.85356	0.571293	2.83297	0.747871
CALML4	-2.55909	-0.808401	0.593613	2.81887	0.736516
	-1.7719	-0.847028	0.572119	2.80555	0.728627
FZD7	-2.8823	0.659604	0.680808	2.80636	0.728627
SRD5A2	-1.71862	-0.898146	0.545694	2.79498	0.721537
RAB17	-2.07342	-0.836418	0.576198	2.79045	0.721537
	-1.54236	0.859386	0.564463	2.79077	0.721537
BCL2A1	-2.37392	-0.640847	0.690343	2.77405	0.715606
PLCB1	-3.18787	0.547076	0.759498	2.77886	0.715606
COL3A1	-4.4933	0.676189	0.667253	2.77644	0.715606
	-1.41707	0.88882	0.548477	2.77613	0.715606
ANO6	-3.95132	0.561972	0.746611	2.76578	0.709912
	-1.83758	-0.861223	0.560658	2.75988	0.708983
PAX9	-2.02284	-0.755974	0.617253	2.75974	0.708983
HSD11B2	-2.89562	-0.845556	0.567927	2.75238	0.704159
UBB	-5.08575	-0.861279	0.559516	2.74804	0.702333
PADI4	-2.07276	-0.897655	0.541008	2.74229	0.700863
	-2.88887	0.553849	0.75066	2.74158	0.700863
ZNF81	-1.66365	0.81775	0.580984	2.73685	0.698613
TMEM92	-1.05511	-0.884005	0.54633	2.72821	0.694274
KLHL24	-3.29418	0.521731	0.775281	2.72761	0.694274
KRT13	-1.34156	-0.885336	0.54288	2.69894	0.683105
CCRN4L	-3.62091	-0.864821	0.553289	2.7013	0.683105
ENOSF1	-3.36009	-0.815132	0.578805	2.69941	0.683105
	-3.06068	-0.799707	0.587668	2.7053	0.683105
TINAG	-3.51339	-0.76339	0.606389	2.69008	0.683105
	-3.14464	-0.745979	0.616499	2.69102	0.683105
DECR2	-3.44584	-0.705598	0.641102	2.69551	0.683105
	-1.98834	-0.683618	0.654239	2.68922	0.683105
	-2.32397	-0.624904	0.693356	2.69043	0.683105
	-2.92795	-0.580247	0.72562	2.69109	0.683105
	-2.40056	0.610689	0.703124	2.68811	0.683105
SLC19A3	-3.41908	0.621102	0.696093	2.69134	0.683105
FXYD2	-4.12195	-0.593987	0.714468	2.68087	0.678147
PTCH1	-3.07658	0.652865	0.673041	2.67694	0.676489
CD48	-2.55332	-0.634759	0.684951	2.67381	0.675611
COX7A1	-3.18578	-0.597988	0.710367	2.66866	0.672708
	-2.56781	-0.774822	0.597133	2.66123	0.667507
	-1.75084	-0.877582	0.542629	2.65694	0.665445
MEP1B	-2.46391	-0.867272	0.546878	2.64793	0.658639
	-3.08108	0.545638	0.747863	2.64522	0.658135
	-3.71275	-0.771669	0.595733	2.62896	0.650557
	-2.31649	-0.717803	0.627321	2.63059	0.650557
BCKDHB	-3.09749	-0.67429	0.654736	2.63319	0.650557
	-3.61696	0.626591	0.686302	2.63019	0.650557
PIPOX	-2.79319	-0.846978	0.554465	2.62062	0.645729
CNTFR	-2.834	-0.820033	0.568008	2.61562	0.645729
	-2.40053	-0.769956	0.595457	2.61645	0.645729
PRODH2	-3.90607	-0.678974	0.650379	2.61956	0.645729
KCNU1	-1.98435	-0.870714	0.541163	2.60757	0.643967
PDLIM4	-3.05843	-0.751027	0.605479	2.60854	0.643967
	-2.34985	-0.695821	0.638944	2.61162	0.643967
ADGRL4	-3.0785	0.768817	0.594655	2.60196	0.640431
INMT	-2.83361	-0.824174	0.562525	2.58272	0.623739
GCKR	-2.34558	-0.799363	0.57523	2.57708	0.623739
NAAA	-3.67101	-0.719621	0.621084	2.5792	0.623739
	-2.61744	0.789206	0.580985	2.57908	0.623739
VTCN1	-1.03252	-0.853173	0.545763	2.56551	0.620784
HSPB8	-2.75129	-0.836306	0.554696	2.56808	0.620784
SULT1C2	-2.62904	-0.833222	0.555673	2.56191	0.620784
MYBPH	-1.68094	-0.791804	0.57849	2.56853	0.620784
FAH	-3.46788	-0.653297	0.661144	2.56015	0.620784
	-3.49084	-0.531112	0.751139	2.56084	0.620784
SMPDL3B	-4.35638	0.695516	0.634216	2.56278	0.620784
MAFF	-3.59995	-0.841119	0.55041	2.55048	0.61701
	-3.01015	-0.600082	0.696862	2.54858	0.61701
	-2.22103	-0.590063	0.704257	2.54938	0.61701
IL22RA1	-1.70376	0.796529	0.574137	2.55118	0.61701
PPP1R1B	-2.3571	-0.741134	0.604498	2.54197	0.612326
FILIP1	-2.2753	-0.806883	0.566315	2.52964	0.610054
TOB1	-3.43833	-0.765442	0.589325	2.53073	0.610054
POAT1-1	-3.69939	-0.735273	0.606573	2.52864	0.610054
EAF2	-2.78133	-0.709986	0.621545	2.52645	0.610054
	-2.11299	-0.706603	0.624683	2.53676	0.610054
C4orf46	-2.70618	-0.596794	0.697008	2.52681	0.610054
CX3CR1	-1.99046	0.699554	0.628385	2.53043	0.610054
CNDP1	-3.47486	-0.724548	0.61211	2.52049	0.609648
CXCL8	-0.93361	-0.714924	0.618033	2.52159	0.609648
EIF4A2	-4.46231	-0.461191	0.808445	2.52192	0.609648
	-2.52596	-0.607555	0.688401	2.51864	0.609637
RAB11FIP3	-3.2712	-0.680734	0.638732	2.51598	0.608802
PLK5	-1.40492	-0.83331	0.550555	2.51263	0.607278
SLC6A19	-3.75443	-0.789249	0.573893	2.51018	0.606642
	-1.58826	-0.811643	0.561203	2.50502	0.605083
ACSM5	-2.54378	-0.731602	0.606365	2.50571	0.605083
F13A1	-2.87536	-0.74788	0.595748	2.49557	0.599208
ROGDI	-3.50914	-0.586676	0.701275	2.49646	0.599208
HOGA1	-3.63505	-0.807777	0.561714	2.4901	0.595512
UBC	-4.71132	-0.80006	0.565283	2.4844	0.592443
UCP2	-3.14914	-0.580739	0.704144	2.48174	0.592443
CRIM1	-4.10112	0.504515	0.765344	2.48262	0.592443
	-2.53732	-0.736219	0.600424	2.47517	0.587613
KYNU	-2.89547	-0.62224	0.672935	2.47009	0.584273
	-2.88971	0.54729	0.728329	2.46682	0.582742
SLC6A13	-1.32601	-0.839719	0.542217	2.46498	0.582629
MSANTD1	-1.5374	-0.794019	0.56584	2.45859	0.579828
PHYHD1	-3.25792	-0.552542	0.723453	2.45997	0.579828
DUT	-2.56383	-0.528711	0.742287	2.45704	0.579828
EPHA2	-3.96098	-0.792637	0.56599	2.45291	0.579518
	-2.8825	-0.791276	0.566436	2.4501	0.579518
SLC23A3	-2.28882	-0.769914	0.578203	2.44899	0.579518
	-2.33721	-0.768592	0.578864	2.44819	0.579518
	-3.33707	-0.687539	0.627095	2.44663	0.579518
DDR2	-2.58781	0.523289	0.746065	2.45049	0.579518
AMACR	-2.90481	-0.614809	0.674861	2.43926	0.573812
GFRA2	-1.6049	-0.834633	0.541485	2.4335	0.571348
CXCL2	-2.33407	-0.763139	0.580421	2.43391	0.571348
	-2.20971	-0.834928	0.540985	2.43028	0.570683
NDUFB5	-3.00284	-0.468079	0.792236	2.42956	0.570683
SNX3	-3.50896	-0.459265	0.800095	2.42588	0.568638
	-1.74272	-0.831971	0.540987	2.41608	0.568493
CCL22	-1.83119	-0.768638	0.576025	2.42208	0.568493
IDH1	-3.46814	-0.723438	0.602443	2.42299	0.568493
SLC22A12	-4.41516	-0.613076	0.673738	2.41753	0.568493
	-2.0688	-0.611241	0.675006	2.41721	0.568493
MAGEL2	-1.85767	0.701052	0.615375	2.41635	0.568493
ACE2	-3.13552	-0.625093	0.664634	2.41133	0.565328
	-1.63633	-0.825175	0.543636	2.4077	0.564499
AMBRA1	-3.31227	0.575959	0.699752	2.40734	0.564499
SOX9	-2.24166	-0.794088	0.55989	2.40382	0.564109
C1orf95	-0.755096	-0.758688	0.579847	2.4052	0.564109
CHI3L1	-2.63584	-0.721397	0.600986	2.39835	0.563415
STRIP2	-2.81554	-0.702273	0.612563	2.39752	0.563415
P2Y6R	-2.43018	-0.617231	0.669037	2.40132	0.563415
	-2.99659	0.470054	0.786855	2.39692	0.563415
DAG1	-3.75625	0.511782	0.749593	2.39396	0.561991
LGALS8	-2.14269	0.632015	0.657474	2.38962	0.559187
BCMO1	-1.80347	-0.797253	0.555869	2.38294	0.558581
SCRN2	-3.42763	-0.576155	0.697028	2.38386	0.558581
	-2.34171	0.578304	0.695796	2.38736	0.558581
ERBB3	-3.83858	0.713795	0.603965	2.3836	0.558581
MGAT4C	-1.70311	-0.777145	0.566422	2.37804	0.555181
PMAIP1	-2.68787	-0.757109	0.576765	2.36901	0.555104
	-3.11961	-0.73243	0.591018	2.36776	0.555104
	-1.90878	-0.666874	0.632484	2.37446	0.555104
C16orf89	-2.96113	-0.665089	0.633092	2.36945	0.555104
FAM3B	-2.36312	-0.617827	0.665195	2.37026	0.555104
TSPAN33	-3.59377	-0.593532	0.682358	2.36793	0.555104
AGO1	-2.97885	0.530919	0.730572	2.3661	0.555104
	-2.13196	0.602427	0.675854	2.36753	0.555104
XYLB	-2.87924	-0.793208	0.554415	2.35	0.54152
TRAM2	-2.5254	0.630437	0.653953	2.34815	0.54152
	-2.03581	0.648579	0.641653	2.34834	0.54152
CXCL12	-3.15318	-0.603229	0.672835	2.34568	0.540498
CH242-227G20.3	-2.65306	-0.583756	0.686917	2.34417	0.540427
CNNM1	-1.9146	-0.780166	0.560796	2.34271	0.540399
TPK1	-2.80864	-0.569093	0.697437	2.33949	0.538611
PPP1R3B	-2.47339	-0.726752	0.590541	2.33334	0.533885
P4HA2	-2.28625	-0.577575	0.689862	2.32931	0.531277
	-3.89327	-0.797477	0.549096	2.32352	0.527859
FBP1	-4.31457	-0.728344	0.587996	2.31928	0.527859
	-3.14305	-0.694245	0.608862	2.31965	0.527859
CES3	-2.94225	-0.658518	0.631899	2.32046	0.527859
	-5.5117	-0.544805	0.713884	2.31746	0.527859
SLC35G1	-2.21097	0.592215	0.677749	2.31836	0.527859
FTCD	-3.79886	-0.67104	0.623159	2.31555	0.52734
HGFAC	-2.97894	-0.578201	0.687447	2.3122	0.525373
OSCAR	-1.69847	-0.757204	0.568502	2.29639	0.524463
CA4	-3.54346	-0.701877	0.601509	2.29687	0.524463
	-3.20412	-0.675993	0.619136	2.30828	0.524463
CSF2RB	-3.48608	-0.655024	0.632447	2.30501	0.524463
ALDH4A1	-3.97793	-0.645079	0.638408	2.29905	0.524463
SLC25A1	-3.61408	-0.586753	0.679007	2.2942	0.524463
IYD	-2.88011	-0.571657	0.690543	2.29607	0.524463
EOGT	-2.68312	-0.546862	0.710554	2.30263	0.524463
RUNX2	-2.61678	-0.505015	0.744277	2.29524	0.524463
LMO2	-3.15274	-0.495256	0.753392	2.30081	0.524463
LMF1	-3.09886	-0.453929	0.790413	2.29367	0.524463
PTPRG	-3.58922	0.519763	0.732816	2.30428	0.524463
	-2.64728	0.522169	0.731453	2.3099	0.524463
SLC6A15	-1.84172	-0.788859	0.549202	2.28328	0.523275
RHCG	-2.82744	-0.769642	0.560042	2.28439	0.523275
CCR1	-3.21103	-0.666942	0.622193	2.28397	0.523275
	-2.85408	-0.646511	0.635727	2.28416	0.523275
AGXT2	-3.88181	-0.646303	0.636552	2.29009	0.523275
	-3.78201	-0.643692	0.638273	2.28977	0.523275
HADH	-3.87707	-0.622438	0.652431	2.28609	0.523275
SPRED3	-2.19523	-0.617725	0.655083	2.28049	0.521782
	-2.03096	-0.695485	0.603158	2.27676	0.520391
ASL	-3.80498	-0.573255	0.68707	2.27651	0.520391
ADCK3	-3.651	-0.628855	0.646505	2.2734	0.518565
MIOX	-4.51793	-0.721937	0.586148	2.26989	0.51802
AKR1C1	-3.0292	-0.500085	0.745501	2.26902	0.51802
	-1.21376	0.796514	0.543483	2.27014	0.51802
AS3MT	-2.61073	-0.690065	0.605195	2.26507	0.515345
RIMBP2	-1.4974	0.764935	0.55981	2.25951	0.511054
HSPA2	-2.78717	-0.759414	0.562564	2.25617	0.510752
CH242-136A20.1	-1.87655	-0.63983	0.636826	2.25488	0.510752
	-3.32087	-0.457856	0.78208	2.25418	0.510752
SNX29	-2.48298	0.616445	0.652919	2.25422	0.510752
	-1.85199	-0.784803	0.547785	2.25194	0.509763
TUBB4A	-1.68935	-0.771227	0.555034	2.24914	0.50821
HAS1	-1.80095	-0.796136	0.540755	2.24512	0.505432
HPD	-3.32354	-0.610455	0.655884	2.24338	0.504938
STXBP6	-2.18199	0.704653	0.593286	2.24104	0.50383
SHISA2	-2.11632	-0.791409	0.542615	2.23896	0.502985
RGS4	-2.65455	-0.780205	0.545304	2.20957	0.496348
DFNB31	-2.26419	-0.770852	0.546813	2.17876	0.496348
NUGGC	-2.1573	-0.763297	0.550141	2.17099	0.496348
PIAP	-3.88052	-0.74347	0.565111	2.20012	0.496348
	-2.27631	-0.729026	0.572266	2.18883	0.496348
PAX5	-1.13298	-0.713867	0.583256	2.20425	0.496348
ARG2	-1.82879	-0.711631	0.583762	2.19715	0.496348
BTG2	-3.91724	-0.707175	0.589939	2.22591	0.496348
FAM109A	-2.85856	-0.700645	0.591556	2.20575	0.496348
RNF122	-2.36668	-0.70017	0.590778	2.19687	0.496348
CONNEXIN	-3.38163	-0.689761	0.597922	2.20215	0.496348
GPR183	-2.63998	-0.68956	0.594422	2.17229	0.496348
GULDH	-4.22863	-0.689052	0.59505	2.17481	0.496348
DRD2	-1.97867	-0.686301	0.599061	2.19351	0.496348
REEP6	-2.33445	-0.673895	0.610304	2.22113	0.496348
DAK	-3.73599	-0.670881	0.605868	2.16838	0.496348
	-1.83152	-0.660752	0.619345	2.22521	0.496348
SLC15A2	-3.36746	-0.658665	0.614717	2.17546	0.496348
PC	-4.30946	-0.657762	0.615639	2.17814	0.496348
	-2.43254	-0.653458	0.62228	2.20945	0.496348
TTC36	-3.55937	-0.645243	0.626598	2.19967	0.496348
NAP1L5	-2.46403	-0.64229	0.625207	2.17184	0.496348
RRAD	-3.15932	-0.636229	0.635144	2.21997	0.496348
CYP2D6	-3.98573	-0.625901	0.639714	2.19884	0.496348
ACAA	-2.64124	-0.624202	0.640287	2.1938	0.496348
CRYZ	-4.06533	-0.623943	0.6445	2.22741	0.496348
	-0.804387	-0.615655	0.643858	2.17394	0.496348
FRAS1	-2.7985	-0.612607	0.651449	2.21891	0.496348
PCK2	-4.412	-0.612389	0.648607	2.19399	0.496348
GLYCTK	-2.75714	-0.603351	0.655502	2.19761	0.496348
KLK1	-3.61806	-0.601208	0.65664	2.19424	0.496348
IFT27	-2.37209	-0.590787	0.663695	2.18979	0.496348
IMMP2L	-2.41997	-0.590383	0.667435	2.21839	0.496348
CMBL	-2.97171	-0.590294	0.663314	2.18367	0.496348
RHOB	-4.22672	-0.589037	0.666498	2.20232	0.496348
	-3.85151	-0.581526	0.672189	2.2033	0.496348
MUT	-3.37738	-0.535371	0.71084	2.22614	0.496348
MORN2	-2.64399	-0.507927	0.728779	2.18529	0.496348
SDSL	-3.82286	-0.49861	0.736671	2.18408	0.496348
CES1	-3.81086	-0.483885	0.753381	2.21467	0.496348
ERP29	-3.51304	-0.437497	0.794529	2.19291	0.496348
PMM1	-3.94321	-0.43225	0.798676	2.1839	0.496348
PIGM	-2.51047	0.507462	0.728301	2.17812	0.496348
MYO9A	-2.97008	0.519411	0.722055	2.21002	0.496348
PEAR1	-3.56465	0.532653	0.713166	2.22712	0.496348
	-2.3334	0.571681	0.679425	2.20181	0.496348
	-2.40035	0.588267	0.664588	2.18187	0.496348
PDE5A	-2.25154	0.615484	0.6496	2.22046	0.496348
PDGFC	-3.21189	0.621963	0.638965	2.17013	0.496348
FLT4	-2.52368	0.630915	0.632551	2.16845	0.496348
SLC39A14	-2.34209	0.695831	0.590551	2.17279	0.496348
STAC	-2.00561	0.699413	0.593181	2.21293	0.496348
APOER2	-3.60843	0.746963	0.565683	2.22185	0.496348
TREM2	-1.13786	0.768273	0.54819	2.17812	0.496348
TTLL10	-1.64631	0.772608	0.545685	2.17762	0.496348
RNF222	-1.38233	0.77833	0.543786	2.18834	0.496348
	-1.49802	-0.776856	0.54085	2.15761	0.493989
HIST1H1D	-2.91977	-0.719069	0.574448	2.15785	0.493989
	-1.82813	-0.666048	0.607212	2.15378	0.493989
C5AR1	-3.00595	-0.632695	0.630583	2.16238	0.493989
AGMAT	-3.68299	-0.608568	0.64672	2.15631	0.493989
AOX1	-2.76876	-0.598442	0.653655	2.15346	0.493989
	-2.86357	-0.546821	0.693717	2.16063	0.493989
PHLDA2	-2.66881	-0.543919	0.69568	2.15781	0.493989
	-2.3179	-0.522513	0.712758	2.1549	0.493989
BOD1L1	-3.57329	0.428009	0.799817	2.15826	0.493989
PCSK6	-2.27553	0.623305	0.637141	2.1629	0.493989
ZNF398	-1.49659	0.741766	0.560781	2.15646	0.493989
ENPP5	-3.28906	-0.674818	0.600965	2.14921	0.492642
MYO7A	-3.16484	-0.66598	0.606642	2.14882	0.492642
CLYBL	-2.37587	-0.60345	0.649291	2.14744	0.492642
HDAC7	-2.92374	0.534298	0.702565	2.1508	0.492642
GDF7	-1.29544	0.744885	0.557787	2.14699	0.492642
TFR2	-3.23778	-0.593418	0.656367	2.14579	0.492466
	-3.77806	-0.605105	0.647257	2.14064	0.488327
FOS	-4.09202	-0.675235	0.599257	2.13762	0.487331
MTHFD1	-3.46441	-0.56584	0.676049	2.13786	0.487331
	-2.17555	-0.704113	0.580632	2.13411	0.485609
REN	-2.01996	-0.68702	0.591276	2.13388	0.485609
RBP5	-2.74977	-0.624587	0.631817	2.1272	0.482681
THNSL2	-2.91349	-0.604222	0.646207	2.12715	0.482681
	-2.90018	0.45157	0.772654	2.12695	0.482681
PITPNC1	-3.22676	0.560504	0.679026	2.12875	0.482681
EFCAB4A	-2.77033	-0.545781	0.690045	2.12443	0.481159
ATP10A	-2.68464	-0.637062	0.622598	2.12217	0.479894
PHLDA1	-2.68221	-0.505829	0.722521	2.12014	0.478856
DAO	-4.29813	-0.707174	0.576722	2.11795	0.478446
CHREBP	-3.02289	-0.690619	0.586986	2.11776	0.478446
	-2.03489	0.571214	0.669183	2.11584	0.477505
EYA2	-1.44454	-0.767027	0.540663	2.1118	0.476408
AMCF-II	-2.68045	-0.678561	0.593939	2.11224	0.476408
	-1.44015	0.750465	0.55026	2.11273	0.476408
DUSP4	-3.36154	-0.648237	0.613019	2.1061	0.472657
FRMD3	-2.19361	0.663906	0.602699	2.10652	0.472657
SERPINC1	-2.27466	-0.607603	0.640999	2.10505	0.472574
SLC13A5	-2.17341	-0.665259	0.601008	2.10016	0.471547
	-2.41274	-0.607035	0.640824	2.10047	0.471547
PARK7	-3.87979	-0.508927	0.71752	2.10156	0.471547
	-1.76165	0.652135	0.609769	2.10102	0.471547
	-2.20716	-0.6391	0.617755	2.09486	0.467203
	-1.9002	-0.753404	0.544777	2.08298	0.460355
	-2.35109	-0.752383	0.5455	2.08402	0.460355
CSRNP3	-1.73362	-0.730453	0.558532	2.08547	0.460355
	-2.72265	-0.664565	0.599304	2.08327	0.460355
SAMSN1	-2.22373	-0.641813	0.614309	2.0823	0.460355
IL17RD	-2.20021	0.596584	0.646235	2.08377	0.460355
VNN1	-3.08128	-0.732261	0.556755	2.07998	0.459932
KANK4	-1.62341	0.719094	0.564717	2.08063	0.459932
HAPLN3	-2.94522	-0.676734	0.590543	2.07642	0.458878
PLK3	-2.89085	-0.66777	0.596296	2.07611	0.458878
CA2	-3.50304	-0.655471	0.60449	2.07706	0.458878
AADC	-2.19717	-0.687275	0.583537	2.07413	0.458156
	-4.24331	-0.538341	0.689531	2.07352	0.458156
NFU1	-2.34975	-0.519791	0.704488	2.07141	0.456973
MXRA8	-3.66102	-0.711305	0.56737	2.06452	0.454705
	-2.5115	-0.652788	0.604686	2.06477	0.454705
ASS1	-4.92641	-0.570897	0.663029	2.06577	0.454705
RGS2	-3.26207	-0.551701	0.677921	2.06606	0.454705
STAP2	-2.26158	-0.536275	0.690038	2.06452	0.454705
ITGA6	-1.39107	-0.756	0.540729	2.06318	0.454286
FN3K	-2.80865	-0.638739	0.61378	2.06203	0.454057
ULK1	-3.75051	0.503832	0.716585	2.06024	0.453184
	-2.51171	0.70544	0.570019	2.05723	0.451085
FFAR2	-1.91172	-0.731073	0.554244	2.05513	0.449891
HSPE1	-4.09711	-0.64204	0.610384	2.05314	0.448815
RCAN1	-3.54183	-0.58864	0.647931	2.05187	0.448452
	-2.14016	-0.616162	0.627896	2.05041	0.447902
	-2.48989	0.561204	0.667969	2.04658	0.444973
DENND4C	-3.342	0.412136	0.801582	2.04301	0.442302
RDH5	-2.19688	-0.734023	0.550745	2.04173	0.442066
DPYS	-4.02133	-0.671606	0.589241	2.04097	0.442066
TSPO	-3.00453	-0.492855	0.723318	2.03855	0.441429
	-2.27394	0.555519	0.671422	2.03919	0.441429
NOXA1	-2.29779	-0.571558	0.658301	2.03341	0.440741
GGH	-3.63796	-0.508047	0.709803	2.03604	0.440741
TRA2A	-3.22018	-0.506452	0.710984	2.03464	0.440741
HIGD2A	-3.1825	-0.465953	0.747109	2.03409	0.440741
LC8	-3.31768	-0.433139	0.778753	2.03355	0.440741
VNN2	-1.88032	-0.727448	0.552738	2.02719	0.440669
SLC25A48	-2.36149	-0.707078	0.56508	2.02725	0.440669
SLC45A2	-1.84837	-0.622033	0.62126	2.03124	0.440669
	-3.61162	-0.620661	0.621799	2.02805	0.440669
PLEK	-3.18843	-0.617066	0.624609	2.03023	0.440669
	-2.6047	-0.586653	0.64626	2.02796	0.440669
	-3.54359	0.439753	0.77187	2.03127	0.440669
SORD	-3.96005	-0.594761	0.639417	2.0213	0.435651
POLH	-2.91145	-0.549405	0.673654	2.01969	0.434907
C4A	-4.30768	-0.525688	0.692294	2.01575	0.432701
NOVA2	-2.31121	0.610554	0.6274	2.01652	0.432701
UPP1	-2.53157	-0.628359	0.614557	2.01382	0.431633
GLRX5	-3.28245	-0.498168	0.7149	2.01015	0.428829
SULT1B1	-1.87708	-0.737597	0.544093	2.00742	0.428796
CDC25C	-1.86851	-0.652161	0.597508	2.00706	0.428796
AKR7A2	-3.90193	-0.60082	0.632932	2.00567	0.428796
CYB5A	-4.31981	-0.554838	0.667382	2.00471	0.428796
	-2.84261	-0.511005	0.703103	2.00455	0.428796
	-2.53329	-0.503294	0.709649	2.00413	0.428796
	-2.83012	-0.460741	0.748489	2.00768	0.428796
ANKRD9	-2.5695	-0.536043	0.681506	1.99843	0.423945
CNTN4	-0.807514	-0.674187	0.581517	1.99539	0.421758
CLEC18A	-1.33849	-0.733688	0.54462	1.99416	0.421368
NPBWR1	-1.99407	0.604958	0.628245	1.99296	0.421017
SLC22A4	-2.3273	-0.714326	0.554754	1.9832	0.419423
SLC25A34	-2.40776	-0.708967	0.558293	1.98518	0.419423
	-3.59566	-0.667239	0.585332	1.99031	0.419423
GGACT	-3.25418	-0.576296	0.648538	1.98714	0.419423
	-2.79729	-0.539551	0.676593	1.98302	0.419423
	-3.56993	-0.519765	0.69305	1.98472	0.419423
	-3.38061	-0.469991	0.737241	1.98822	0.419423
CHCHD10	-3.58406	-0.431661	0.774143	1.98789	0.419423
DEAF1	-3.35766	-0.421027	0.784808	1.98665	0.419423
TMEM45B	-2.77098	0.725292	0.548258	1.98408	0.419423
CD19	-1.48984	-0.73611	0.541484	1.98154	0.418774
SFRP2	-0.929705	-0.709493	0.556518	1.97448	0.41827
CDKL1	-2.64606	-0.633676	0.6057	1.97522	0.41827
HSDL2	-2.82927	-0.627507	0.610439	1.97883	0.41827
EGR2	-2.3279	-0.598883	0.630445	1.97684	0.41827
GALM	-3.94037	-0.560056	0.659929	1.97958	0.41827
PPID	-3.14622	-0.422092	0.782337	1.97652	0.41827
SOD2	-4.35272	0.522714	0.689543	1.97698	0.41827
	-1.50502	0.695766	0.565056	1.97487	0.41827
	-2.18892	-0.722067	0.548758	1.97352	0.41812
INHBA	-1.90155	-0.734297	0.541054	1.97052	0.415995
SCLY	-2.99825	-0.569783	0.651115	1.96977	0.415995
	-2.8335	-0.565752	0.653876	1.96741	0.414438
TRPM3	-2.56253	-0.677574	0.575427	1.96655	0.414386
	-2.24303	0.53129	0.680871	1.96523	0.413867
	-2.05379	-0.673632	0.577147	1.96061	0.41121
SLC25A4	-3.45194	-0.573729	0.646949	1.96123	0.41121
TGFBI	-3.60444	0.559482	0.657723	1.96016	0.41121
	-1.26305	-0.726773	0.543741	1.95748	0.410871
LMNA	-4.63849	-0.707329	0.555184	1.95505	0.410871
C4BPA	-2.72103	-0.689193	0.566503	1.95533	0.410871
DHRS4	-3.4027	-0.558088	0.658315	1.95659	0.410871
NDUFB4	-3.39307	-0.421704	0.780054	1.95691	0.410871
	-2.59912	0.534081	0.67728	1.95564	0.410871
TMC1	-1.06605	-0.724612	0.54387	1.94903	0.40722
	-2.97974	-0.610374	0.618419	1.94932	0.40722
SLC30A7	-3.06294	0.462612	0.738783	1.94921	0.40722
TRPV5	-2.96626	0.655453	0.587145	1.94694	0.405915
OSR2	-3.36112	-0.717092	0.547337	1.94136	0.405087
SLC25A25	-3.93149	-0.65158	0.588669	1.93937	0.405087
GRAMD3	-3.05716	-0.625558	0.606643	1.94134	0.405087
AGPAT4	-3.18023	-0.623644	0.607432	1.93745	0.405087
ENKD1	-2.18773	-0.537185	0.672474	1.93909	0.405087
LTA4H	-3.57313	-0.468824	0.732085	1.94267	0.405087
CRYM	-3.06796	-0.467483	0.733197	1.94172	0.405087
	-3.30356	-0.46632	0.734251	1.94152	0.405087
ADRA1B	-2.3383	0.475226	0.725377	1.93679	0.405087
ZNF711	-2.0038	0.552309	0.660526	1.93989	0.405087
	-2.14661	0.567954	0.648765	1.94255	0.405087
	-2.16823	0.627166	0.605045	1.93786	0.405087
ECH1	-3.15062	-0.53242	0.675797	1.93516	0.404227
	-1.84315	-0.654235	0.58576	1.93117	0.401142
	-2.74945	0.506109	0.697164	1.93055	0.401142
C10orf10	-1.99585	-0.709316	0.550349	1.92898	0.400667
	-2.53783	-0.586351	0.63297	1.92855	0.400667
PRP	-3.82571	-0.670715	0.574364	1.92693	0.400341
SC4MOL	-3.27008	-0.650978	0.587303	1.9267	0.400341
	-3.17344	-0.418501	0.779065	1.92593	0.400331
	-2.48212	-0.687027	0.563552	1.92425	0.400162
ACAA	-3.90772	-0.567558	0.646534	1.92438	0.400162
ASB13	-3.68959	-0.507843	0.694593	1.9228	0.399469
FOXJ1	-3.50448	-0.69344	0.558892	1.91979	0.398415
ACAD11	-3.41548	-0.62028	0.606954	1.91725	0.398415
TSPAN5	-3.12552	-0.474374	0.723927	1.92085	0.398415
PIGP	-2.46241	-0.459046	0.737787	1.91796	0.398415
SLMAP	-2.76228	0.427089	0.769121	1.91793	0.398415
BROX	-3.0313	0.5129	0.689738	1.91887	0.398415
CCDC153	-1.13427	-0.708632	0.548613	1.91364	0.397002
B3GNT5	-3.05326	-0.682589	0.564885	1.91372	0.397002
CCDC64	-3.33821	0.551722	0.657308	1.9136	0.397002
ACTL6B	-0.874331	-0.671166	0.571895	1.91145	0.396545
	-2.29277	-0.618918	0.60721	1.91228	0.396545
PPAPDC1A	-3.06728	-0.592596	0.625891	1.91092	0.396545
PPEF2	-1.49117	-0.698895	0.554049	1.90958	0.395946
GALNT11	-3.87892	-0.628957	0.599474	1.907	0.394095
	-1.82495	-0.601876	0.618294	1.90492	0.393488
TRIM62	-2.61199	0.589951	0.627056	1.90542	0.393488
OATV1	-3.50335	-0.576535	0.636763	1.90343	0.392727
GJC1	-2.56375	-0.598222	0.620231	1.89994	0.389968
SLC51A	-3.2048	-0.620213	0.604329	1.89837	0.389132
RABGAP1L	-1.80636	-0.604204	0.61534	1.89594	0.388888
RBP5	-3.35869	-0.551665	0.65498	1.89686	0.388888
UBTD1	-2.80006	-0.521471	0.679302	1.896	0.388888
	-2.16433	-0.715086	0.541606	1.89202	0.385991
LSMEM1	-1.18119	-0.686072	0.559099	1.88855	0.385991
	-1.18021	-0.651844	0.581353	1.88875	0.385991
CNKSR3	-3.17435	-0.644201	0.586789	1.89094	0.385991
DIO1	-3.66061	-0.566461	0.642318	1.88868	0.385991
RHOD	-3.18171	-0.486928	0.708173	1.88974	0.385991
	-2.48529	0.528726	0.672158	1.88799	0.385991
	-3.23291	-0.584538	0.628387	1.88667	0.385394
UCHL1	-2.25843	0.655537	0.577817	1.88121	0.380642
AIF1	-1.20118	-0.707967	0.543638	1.87591	0.376771
AOC1	-4.27503	-0.679757	0.561318	1.87605	0.376771
	-2.10182	-0.675917	0.563529	1.87432	0.376624
SOCS3	-3.25626	-0.67066	0.566717	1.87292	0.376624
SDHC	-3.85755	-0.47004	0.721125	1.8732	0.376624
SHE	-2.63153	0.568004	0.638898	1.87312	0.376624
BAG2	-1.62758	-0.708768	0.542184	1.86924	0.375814
ACHE	-2.0522	-0.669718	0.566613	1.86798	0.375814
TIMP1	-1.63501	-0.656084	0.575467	1.86743	0.375814
	-2.11041	-0.63928	0.587093	1.86991	0.375814
NAGS	-2.45255	-0.610115	0.606977	1.86718	0.375814
PAF-AH	-2.908	-0.447614	0.741565	1.86773	0.375814
	-2.95425	0.499407	0.694084	1.8682	0.375814
CLEC2D	-1.48982	-0.682189	0.558275	1.86573	0.375072
NFE2	-2.07342	-0.706019	0.542806	1.8619	0.373198
OCA2	-2.59208	-0.68869	0.55368	1.86246	0.373198
ALPL	-3.58513	-0.4998	0.692706	1.86107	0.373198
	-2.50996	0.536969	0.661555	1.86109	0.373198
TEKT2	-0.748663	-0.638754	0.585765	1.8583	0.372479
ACSM4	-3.71458	-0.629439	0.592024	1.85747	0.372479
PROC	-3.02509	-0.458871	0.729579	1.85948	0.372479
PTGIS	-3.46927	0.458628	0.729432	1.85689	0.372479
CDYL2	-2.26907	0.614168	0.602695	1.85751	0.372479
PKIG	-3.30766	-0.593578	0.617313	1.85619	0.372469
BHMT	-1.61686	-0.703414	0.543297	1.85426	0.371907
SHPRH	-2.73399	0.547187	0.652418	1.85457	0.371907
GNA14	-2.5122	0.516182	0.677463	1.8526	0.370934
FAM84A	-3.33742	-0.645756	0.579982	1.85113	0.370148
	-2.9376	-0.667929	0.565098	1.84961	0.369999
ACSM3	-3.10163	-0.487463	0.701937	1.84996	0.369999
	-2.72241	0.496409	0.693715	1.84775	0.368817
TNP2	-0.818054	0.598922	0.612071	1.84698	0.368724
HECW1	-2.05567	-0.693857	0.548042	1.84609	0.368521
PEX11G	-2.24422	-0.630488	0.588686	1.83964	0.362747
IL1RAPL2	-1.30725	-0.701202	0.541965	1.83588	0.361066
FACL2	-4.35328	-0.675175	0.557103	1.82719	0.361066
	-2.24844	-0.671183	0.560534	1.83296	0.361066
HS3ST1	-1.92694	-0.668375	0.561574	1.82769	0.361066
	-3.2816	-0.658842	0.56781	1.82767	0.361066
LRRC8C	-3.11345	-0.655859	0.570506	1.83257	0.361066
	-4.3824	-0.607953	0.602817	1.82832	0.361066
ARID3B	-2.96404	-0.601969	0.608281	1.83621	0.361066
AGXT	-3.61072	-0.592615	0.614192	1.83019	0.361066
ACADVL	-3.68475	-0.427062	0.755872	1.82614	0.361066
HMGCL	-3.57358	-0.416198	0.7683	1.83447	0.361066
TOMM7	-3.11815	-0.400997	0.783767	1.82981	0.361066
ADPRH	-2.58949	0.464131	0.720215	1.82945	0.361066
	-2.69242	0.490527	0.695606	1.82551	0.361066
	-3.20241	0.527117	0.66528	1.83169	0.361066
CYP2U1	-2.24696	0.54665	0.648525	1.82528	0.361066
ORC2	-1.93723	0.563131	0.635955	1.8275	0.361066
ZC3HAV1L	-2.20965	0.598145	0.61045	1.83216	0.361066
	-2.94933	0.642114	0.578789	1.82639	0.361066
COMT	-3.47946	-0.572889	0.627795	1.82279	0.359243
ANGPTL4	-4.17721	-0.665628	0.562336	1.8208	0.358598
SARDH	-3.94132	-0.647256	0.574048	1.81782	0.358598
	-3.30402	-0.625731	0.588674	1.81741	0.358598
ATF3	-3.97178	-0.611378	0.598773	1.81755	0.358598
PTPRE	-3.29432	-0.59792	0.608152	1.81563	0.358598
	-3.14872	-0.539227	0.653724	1.82031	0.358598
THAP2	-2.41521	-0.500057	0.686111	1.81787	0.358598
LHPP	-2.98568	-0.432174	0.749777	1.81991	0.358598
PPME1	-3.35	-0.424085	0.757384	1.8159	0.358598
ZER1	-3.34283	0.497551	0.688122	1.81673	0.358598
	-2.28668	-0.534292	0.656728	1.8137	0.357316
TXN2	-3.48323	-0.404911	0.776529	1.80958	0.353843
C14orf37	-1.68553	-0.616009	0.594108	1.8083	0.353779
AMN	-4.16546	-0.484631	0.698274	1.80823	0.353779
DPEP1	-4.13586	-0.554332	0.639203	1.80349	0.349687
AK1	-2.89125	-0.501626	0.682342	1.80183	0.348668
	-1.83884	-0.66897	0.556836	1.79866	0.348049
RELT	-2.7234	-0.635128	0.579454	1.79914	0.348049
GGT5	-2.66603	-0.59358	0.608186	1.79485	0.348049
MTMR7	-2.58498	-0.593376	0.608521	1.79608	0.348049
ITIH1	-2.38346	-0.585473	0.614349	1.79611	0.348049
BIRC2	-3.49577	-0.583863	0.615582	1.79635	0.348049
ADAMTS4	-3.82572	-0.583125	0.615923	1.79498	0.348049
	-2.47795	0.491605	0.690292	1.79645	0.348049
	-1.79182	0.592317	0.609473	1.79724	0.348049
TRIL	-2.15042	0.601261	0.603146	1.79844	0.348049
	-2.15647	-0.601786	0.601965	1.79315	0.347616
ZNF341	-1.85688	0.597102	0.605362	1.79317	0.347616
RAB3C	-1.41257	-0.692426	0.540652	1.79064	0.345844
LRAT	-2.10362	-0.673895	0.552355	1.79012	0.345844
SUGCT	-2.44659	-0.642566	0.572498	1.78663	0.344163
	-2.59198	-0.58574	0.612761	1.78696	0.344163
VWCE	-2.86678	-0.440691	0.736271	1.78656	0.344163
ADFP	-3.94735	-0.677011	0.549473	1.78435	0.342586
GFPT2	-2.75252	-0.682492	0.545778	1.78309	0.342566
ACADL	-3.66538	-0.543347	0.644849	1.78342	0.342566
AQP11	-2.48669	-0.657276	0.561966	1.78203	0.34256
IL-6	-0.931545	-0.566284	0.62665	1.78184	0.34256
USP43	-2.94806	0.490162	0.689108	1.78029	0.34163
	-1.74389	-0.680624	0.546184	1.77796	0.341167
	-2.70498	-0.53414	0.651508	1.77843	0.341167
MCCD1	-3.40076	-0.502645	0.677916	1.77853	0.341167
GAMT	-2.57928	-0.631132	0.578708	1.77624	0.340087
TRIM68	-3.13705	0.490507	0.688092	1.77565	0.340087
TULP3	-3.09922	0.395157	0.781733	1.77412	0.339789
	-0.476608	0.492789	0.685856	1.77422	0.339789
TP53INP2	-3.44643	-0.665602	0.554987	1.77217	0.339613
KCNQ4	-1.81354	-0.653131	0.563013	1.77095	0.339613
	-2.14688	-0.631497	0.577634	1.77089	0.339613
FOXI1	-3.66536	-0.537781	0.647449	1.77121	0.339613
TMIGD1	-3.73771	-0.517002	0.664613	1.77154	0.339613
	-1.56072	0.685773	0.541686	1.76999	0.339326
	-1.68345	-0.634781	0.57513	1.76925	0.3392
	-2.02885	-0.683938	0.541389	1.76053	0.336128
	-1.68574	-0.655417	0.560143	1.76217	0.336128
2002-03-01	-3.91479	-0.580916	0.612592	1.76247	0.336128
SYT3	-2.30197	-0.529514	0.652841	1.76255	0.336128
PECR	-3.78319	-0.507285	0.671335	1.7617	0.336128
CDIP1	-3.58327	-0.464122	0.709726	1.76022	0.336128
PRADC1	-3.15698	-0.462202	0.71235	1.76555	0.336128
PARG	-2.86286	0.44797	0.725213	1.76089	0.336128
C11orf42	-2.18289	0.513711	0.665626	1.76014	0.336128
ATXN7L1	-2.76394	0.572443	0.619316	1.76469	0.336128
	-1.01164	0.665178	0.553176	1.75865	0.335234
	-2.01149	-0.633829	0.573877	1.75694	0.334721
	-2.32582	0.541613	0.64222	1.75733	0.334721
GALNT16	-1.92967	-0.617331	0.585191	1.75604	0.334422
ssc-mir-425	-1.31612	0.675029	0.54602	1.75368	0.332655
2012-09-01	-1.53395	-0.675605	0.545209	1.75086	0.332205
	-2.30905	-0.529006	0.651462	1.75099	0.332205
	-2.14117	0.570902	0.618362	1.751	0.332205
	-1.65237	0.660873	0.554784	1.75085	0.332205
EMILIN2	-3.573	-0.527786	0.651709	1.74615	0.329863
DPYD	-3.97498	-0.521224	0.657167	1.74631	0.329863
	-3.73438	-0.487179	0.686647	1.74723	0.329863
CEP135	-2.47865	0.459795	0.711738	1.74701	0.329863
HRH1	-1.95815	-0.665796	0.550517	1.74417	0.328475
	-1.62939	-0.672224	0.546053	1.74232	0.327877
LTF	-2.47521	-0.634916	0.570584	1.74062	0.327877
PBXIP1	-3.32436	-0.424547	0.745355	1.74049	0.327877
ABHD4	-3.69045	0.599464	0.59545	1.74006	0.327877
EPHB3	-1.99373	0.621518	0.57989	1.74089	0.327877
	-1.85484	0.624322	0.577953	1.741	0.327877
CDC6	-2.49201	-0.565045	0.620837	1.7382	0.327171
PNPLA6	-3.60042	-0.435807	0.733625	1.73819	0.327171
CD300LB	-0.707837	-0.59198	0.600444	1.73712	0.326686
SLC27A6	-2.75462	-0.670711	0.545868	1.73491	0.325641
	-2.03154	-0.636815	0.568479	1.73548	0.325641
BCL9L	-3.8156	0.381098	0.791142	1.73349	0.324796
NXPH3	-1.32052	0.669072	0.546568	1.73261	0.324496
DHRS7	-3.34264	-0.579176	0.609128	1.73196	0.324424
MAK	-1.35177	-0.676632	0.540855	1.72734	0.323799
	-1.31214	-0.674798	0.542483	1.73018	0.323799
SYNDIG1	-1.34303	-0.674763	0.542055	1.72733	0.323799
MOGAT1	-2.17485	-0.63342	0.569421	1.72674	0.323799
	-2.26575	-0.566206	0.618149	1.72681	0.323799
NIT2	-3.61781	-0.552071	0.629333	1.7281	0.323799
ETFB	-2.66007	-0.466707	0.702337	1.72844	0.323799
OLFM3	-1.85828	0.647872	0.559629	1.72678	0.323799
	-3.70012	-0.452173	0.71559	1.72536	0.323103
ATG2A	-4.1272	0.579649	0.607656	1.7249	0.323103
SFRP5	-2.84145	0.624985	0.574599	1.72268	0.321447
QDPR	-3.70211	-0.526329	0.649082	1.72186	0.321203
MCOLN3	-1.72713	-0.633813	0.56814	1.72037	0.320275
	-2.54958	-0.584865	0.60295	1.71977	0.320241
OAF	-3.78756	-0.551166	0.628597	1.71898	0.320018
ATL2	-3.31581	-0.478348	0.690004	1.71815	0.319755
DNAJA1	-4.48909	-0.62632	0.572813	1.71727	0.319444
MICAL1	-3.25009	-0.622051	0.575507	1.71555	0.319409
UBE2QL1	-2.14356	-0.58692	0.600918	1.71657	0.319409
SORBS2	-2.32896	0.529549	0.645509	1.71606	0.319409
CSRP1	-3.69017	-0.576217	0.608032	1.71107	0.318765
AKAP12	-4.12881	-0.528158	0.645954	1.71169	0.318765
ACY1	-4.50122	-0.492692	0.676275	1.71253	0.318765
FOXRED1	-3.28338	-0.418466	0.747101	1.71197	0.318765
	-2.87522	-0.392129	0.775175	1.71098	0.318765
PAIP2B	-2.77799	0.51339	0.658485	1.71303	0.318765
	-2.06117	0.527418	0.646455	1.71102	0.318765
RGC32	-2.81009	-0.638596	0.563174	1.70971	0.31805
LURAP1	-1.99611	0.607849	0.584516	1.70915	0.31805
ARVCF	-3.89745	-0.492405	0.675854	1.70831	0.317758
	-2.69812	-0.601396	0.588706	1.70638	0.316675
	-3.29939	0.409279	0.755804	1.70611	0.316675
SLC46A2	-2.32264	-0.537003	0.637753	1.70552	0.316639
PRSS22	-3.06557	-0.647104	0.556008	1.70088	0.315704
CDHR5	-4.09156	-0.516127	0.654295	1.70131	0.315704
UHRF1BP1	-3.00806	0.386571	0.780193	1.70362	0.315704
	-2.36412	0.485054	0.681169	1.70073	0.315704
ZSCAN30	-1.76985	0.572794	0.60925	1.70253	0.315704
LIMK1	-3.28782	0.576398	0.606596	1.70297	0.315704
	-1.7264	0.669555	0.541305	1.70156	0.315704
SLC28A2	-1.75683	-0.58839	0.597125	1.69969	0.315387
	-3.10554	-0.518831	0.651706	1.69932	0.315387
	-2.19901	0.498548	0.668747	1.6976	0.314214
CFAP74	-1.68957	-0.668603	0.540988	1.69576	0.314006
RNF208	-2.06649	-0.528103	0.64359	1.69671	0.314006
HEXB	-3.64631	-0.467967	0.696013	1.69621	0.314006
P3H2	-3.58432	-0.501703	0.665443	1.69411	0.312903
PM20D1	-3.65443	-0.460613	0.702162	1.69169	0.311572
USP27X	-2.2804	0.51051	0.657538	1.69197	0.311572
PigE-108A11.6	-1.3775	-0.654302	0.549264	1.68888	0.309845
ALDOB	-5.16519	-0.455543	0.706557	1.68915	0.309845
ABCA8	-1.64825	-0.647633	0.553486	1.68749	0.309528
ATOH8	-2.15001	0.654514	0.548941	1.68776	0.309528
	-1.927	0.539595	0.632594	1.68654	0.309121
CCDC65	-2.10754	-0.622063	0.570492	1.68448	0.307604
CREB3L3	-2.81594	-0.620206	0.571187	1.68078	0.306502
	-2.42193	-0.607489	0.579916	1.67914	0.306502
TF	-3.38801	-0.555595	0.618795	1.67974	0.306502
PDHA1	-4.07346	-0.444896	0.715396	1.68036	0.306502
TMEM206	-3.27685	-0.399667	0.761809	1.67946	0.306502
FAM175A	-2.54976	0.452668	0.707926	1.68068	0.306502
	-2.18785	0.540705	0.630606	1.67982	0.306502
	-2.73164	0.545933	0.626309	1.6791	0.306502
	-1.98532	-0.525518	0.642471	1.67672	0.304655
	-2.68281	-0.553904	0.619341	1.67499	0.303456
	-2.72438	-0.632594	0.561559	1.67443	0.303429
CHST3	-2.77642	-0.640042	0.556335	1.67357	0.3031
	-2.69976	-0.49136	0.670983	1.6726	0.302656
PKIA	-2.82903	-0.624888	0.566322	1.67101	0.301605
PLIN2	-1.50376	-0.627099	0.564597	1.66986	0.300975
SMLR1	-1.4495	-0.649452	0.54899	1.66745	0.299132
	-2.23118	0.575273	0.601582	1.66696	0.299132
RNF125	-2.24256	-0.52844	0.638213	1.66546	0.298844
AAMDC	-2.53245	-0.419561	0.738524	1.66613	0.298844
DHX16	-3.08447	0.454948	0.703186	1.66509	0.298844
CCBL1	-2.97905	-0.488747	0.671816	1.66359	0.29839
SLC27A3	-3.01146	-0.473605	0.685535	1.6639	0.29839
NR4A1	-2.74962	-0.628836	0.561767	1.65998	0.297397
POU2AF1	-2.19101	-0.552462	0.618231	1.66137	0.297397
SLC47A2	-4.07522	-0.537148	0.63028	1.6604	0.297397
	-2.4961	-0.509716	0.653042	1.66038	0.297397
NFKB1	-2.86482	-0.480125	0.679065	1.66068	0.297397
STC1	-3.25799	-0.566599	0.606571	1.65723	0.295678
ERF	-3.92785	-0.529206	0.636275	1.65754	0.295678
LSDP5	-2.93077	-0.615936	0.569021	1.64946	0.295641
NFKB2_TV2	-0.615788	-0.561191	0.610196	1.65397	0.295641
SERPINI1	-2.11999	-0.532733	0.632059	1.64954	0.295641
HLX	-2.43449	-0.48618	0.672271	1.65254	0.295641
DYNLL2	-4.32597	-0.463071	0.69378	1.6547	0.295641
MSRA	-3.27143	-0.461305	0.694731	1.65044	0.295641
VEGFA	-4.05109	-0.460095	0.696842	1.65628	0.295641
MPC2	-3.57383	-0.390273	0.76744	1.65098	0.295641
	-3.72631	-0.359862	0.802558	1.65029	0.295641
SETD1B	-3.65084	0.3682	0.793408	1.65509	0.295641
SUZ12	-2.93953	0.385525	0.772778	1.65111	0.295641
FBXW2	-3.67795	0.423332	0.732163	1.65119	0.295641
PCDH7	-2.29995	0.445462	0.710408	1.65344	0.295641
FAM13C	-2.11445	0.599189	0.581416	1.65201	0.295641
	-1.26822	0.656321	0.541757	1.65137	0.295641
	-1.78043	0.571275	0.601123	1.64594	0.292626
ERCC4	-3.09592	0.500078	0.658795	1.64513	0.292326
IL1A	-1.71	-0.625794	0.561098	1.64332	0.291861
KCNJ15	-3.35168	-0.590642	0.585966	1.6419	0.291861
CKB	-3.71374	-0.484173	0.672344	1.64222	0.291861
	-2.93705	-0.480188	0.676234	1.64401	0.291861
NDUFA12	-3.3066	-0.404724	0.750086	1.64162	0.291861
PKD1	-3.53035	0.390995	0.765104	1.6418	0.291861
	-2.41649	0.545028	0.620726	1.64102	0.291769
C15orf48	-2.28918	-0.484064	0.672153	1.6405	0.291746
CSF2RA	-2.56762	-0.585741	0.589117	1.63911	0.290859
TGFB1	-2.28541	-0.522669	0.638492	1.63849	0.290748
	-1.88067	-0.651308	0.540723	1.6254	0.288441
TOX2	-1.34227	-0.650321	0.542759	1.63355	0.288441
PNP	-3.67686	-0.629425	0.556479	1.6308	0.288441
	-3.68755	-0.601826	0.575011	1.62523	0.288441
RYR2	-2.80817	-0.596313	0.579189	1.62631	0.288441
	-3.24507	-0.589365	0.584945	1.63024	0.288441
ECHDC2	-3.76406	-0.587919	0.585811	1.62906	0.288441
	-2.25093	-0.581481	0.590932	1.63106	0.288441
MYZAP	-2.4602	-0.58102	0.591073	1.62986	0.288441
PDXK	-2.95472	-0.520879	0.638102	1.62734	0.288441
	-2.48251	-0.46288	0.689158	1.62608	0.288441
ACADSB	-4.06268	-0.378647	0.777876	1.63487	0.288441
FAM76B	-2.57764	0.460348	0.691504	1.62588	0.288441
	-2.44848	0.460352	0.691615	1.62655	0.288441
LPAR2	-2.35001	0.462081	0.690965	1.63233	0.288441
ZZEF1	-2.32623	0.47336	0.679764	1.62803	0.288441
PBEF1	-4.42854	0.51902	0.639217	1.62476	0.288441
PROX1	-2.2186	0.541539	0.622127	1.63277	0.288441
MAPK9	-1.7996	0.562278	0.605738	1.63237	0.288441
ZNF395	-1.85809	0.571988	0.598426	1.63311	0.288441
CH242-196P17.1	-2.18383	0.596752	0.579341	1.62909	0.288441
SNAP91	-1.60341	0.600618	0.576457	1.62862	0.288441
ITIH4	-1.42827	0.640379	0.549759	1.63538	0.288441
FOLR2	-3.89074	-0.53796	0.62355	1.62416	0.288333
	-3.12183	-0.575123	0.594314	1.62284	0.287495
FCN1	-2.98776	-0.595107	0.579396	1.62235	0.287494
	-1.63493	-0.646512	0.542326	1.61595	0.286995
CCNB1IP1	-1.28488	-0.642605	0.545576	1.61957	0.286995
R3HDML	-1.63923	-0.605969	0.569745	1.61181	0.286995
EGF	-3.34584	-0.59729	0.57656	1.61503	0.286995
IRAK2	-2.57781	-0.597003	0.5759	1.60995	0.286995
	-2.51506	-0.577658	0.592019	1.62057	0.286995
	-2.86478	-0.571835	0.594419	1.60886	0.286995
GLB1L2	-3.372	-0.568796	0.597103	1.61102	0.286995
HOMER2	-3.0729	-0.541851	0.618014	1.61005	0.286995
TMEM144	-3.04688	-0.520444	0.636461	1.61556	0.286995
VIL1	-3.49826	-0.505235	0.650083	1.61991	0.286995
ISLR	-2.25918	-0.5009	0.652885	1.61439	0.286995
PTGS2	-0.562391	-0.498866	0.654732	1.61486	0.286995
	-3.32633	-0.482834	0.668652	1.6133	0.286995
ACAA2	-3.44506	-0.464683	0.686206	1.61865	0.286995
MYL9	-3.74711	-0.442307	0.706622	1.61269	0.286995
C4orf29	-2.33689	-0.430604	0.71761	1.60885	0.286995
PRCP	-3.19121	-0.412066	0.736833	1.60951	0.286995
ICOSLG	-3.3999	-0.410287	0.73909	1.61171	0.286995
	-3.39562	-0.394632	0.757198	1.61881	0.286995
TXNDC12	-3.2184	-0.368259	0.786802	1.61626	0.286995
ESD	-3.48268	-0.352143	0.804981	1.60892	0.286995
DSN1	-2.92505	0.456034	0.692788	1.60942	0.286995
MGA	-2.40591	0.479581	0.670971	1.6097	0.286995
	-2.24584	0.497467	0.657017	1.62111	0.286995
	-3.30468	0.505833	0.649165	1.61753	0.286995
	-2.99767	0.518115	0.63852	1.61621	0.286995
PIGR	-3.11504	-0.481234	0.66912	1.60762	0.286234
EXT1	-1.90343	-0.539752	0.619057	1.60631	0.285675
RARRES2	-4.09844	-0.438991	0.708762	1.60611	0.285675
ADM5	-1.8942	-0.540104	0.618316	1.60364	0.28456
CLIC5	-3.39789	0.40207	0.746481	1.60358	0.28456
FAM107A	-2.83958	0.555054	0.606503	1.60391	0.28456
PHF19	-2.28087	0.558107	0.603565	1.60068	0.282133
NPPC	-0.847995	-0.550969	0.609059	1.60013	0.282046
	-2.60864	0.455631	0.691484	1.59961	0.282001
LDHA	-3.69626	-0.405784	0.741514	1.59794	0.281607
	-1.96031	0.506297	0.645412	1.59799	0.281607
ACAP2	-1.6944	0.569349	0.594409	1.59781	0.281607
PPM1F	-3.09497	0.466929	0.680219	1.59598	0.280245
	-3.12841	-0.566617	0.59598	1.59483	0.28019
CALCOCO1	-3.80195	0.422024	0.723881	1.59453	0.28019
TRH-DE	-1.52166	0.642517	0.541416	1.59501	0.28019
PCCB	-3.8803	-0.448494	0.69676	1.59048	0.276664
CHPT1	-3.17378	-0.43141	0.713555	1.59007	0.276664
SNRPN	-3.23097	-0.408762	0.736805	1.58909	0.276617
KCNK6	-2.57156	0.555755	0.603464	1.58951	0.276617
TSPO2	-1.22536	-0.638907	0.542527	1.58731	0.275301
S100A10	-1.52063	-0.636771	0.543529	1.58471	0.273164
	-2.18642	-0.499054	0.649022	1.58275	0.271661
SLC22A5	-3.40996	-0.55731	0.600899	1.58175	0.271129
C9orf129	-2.22171	0.580322	0.583022	1.58001	0.269851
RFWD3	-2.3182	0.498484	0.64893	1.57939	0.26969
ALDOC	-2.03915	-0.498156	0.649093	1.57869	0.269444
	-1.27564	-0.632947	0.544986	1.57809	0.269309
DKC1	-1.33888	-0.638569	0.54078	1.57601	0.268934
JUNB	-4.05077	-0.572105	0.588489	1.57588	0.268934
	-3.44116	-0.36471	0.784148	1.57662	0.268934
	-2.84053	0.475762	0.66863	1.57619	0.268934
WNT7A	-0.986998	-0.630966	0.545829	1.57514	0.268649
RENBP	-1.80329	-0.543458	0.610567	1.57456	0.268526
ANKRD44	-2.51666	0.462155	0.680824	1.57387	0.268294
REEP4	-3.31985	0.432309	0.709712	1.57326	0.268148
NOS1	-1.75475	0.577692	0.583677	1.57251	0.267852
IGLV-3	-2.99926	-0.554187	0.601604	1.57187	0.267664
	-2.77582	-0.608893	0.559989	1.56773	0.267325
	-2.18011	-0.544026	0.609409	1.57055	0.267325
PON1	-3.44491	-0.501042	0.644956	1.56943	0.267325
	-3.27468	-0.481488	0.661909	1.56752	0.267325
	-3.83506	-0.476034	0.66732	1.57015	0.267325
PLIN3	-3.02191	-0.370283	0.776193	1.56884	0.267325
	-3.31417	0.349564	0.800954	1.56745	0.267325
TAOK3	-3.16716	0.414552	0.726935	1.56763	0.267325
PCDHGB7	-1.93722	0.558823	0.597726	1.57039	0.267325
	-2.23286	-0.542272	0.609893	1.56535	0.26584
PRDM5	-1.46503	0.627693	0.546313	1.56507	0.26584
PPP1R15A	-3.94747	-0.623069	0.549226	1.56338	0.265836
PSPH	-2.1165	-0.584647	0.576688	1.56237	0.265836
G0S2	-1.06072	-0.576813	0.582613	1.56274	0.265836
APOE	-3.00019	-0.511348	0.635234	1.56445	0.265836
MGST2	-2.51644	-0.432355	0.707805	1.56273	0.265836
MOXD1	-1.7008	0.591753	0.571533	1.56289	0.265836
LDB2	-2.54933	0.571642	0.586296	1.56146	0.265373
	-3.41159	-0.377102	0.766826	1.56069	0.265054
	-2.7157	-0.496422	0.647329	1.5601	0.26491
	-1.54427	-0.631533	0.54179	1.55452	0.264261
XIRP1	-1.62118	-0.627488	0.540836	1.53368	0.264261
	-1.39878	-0.626805	0.541886	1.53687	0.264261
PAPPA2	-2.35786	-0.619604	0.548865	1.54777	0.264261
	-2.1215	-0.619317	0.548553	1.54491	0.264261
DUSP1	-3.4319	-0.60634	0.557017	1.54083	0.264261
NR4A2	-2.69155	-0.605889	0.557693	1.5428	0.264261
TRIB1	-2.07093	-0.599549	0.562012	1.54141	0.264261
	-2.44166	-0.592231	0.570189	1.55729	0.264261
CLSTN3	-2.19828	-0.590273	0.56944	1.54506	0.264261
	-1.79418	-0.588381	0.572956	1.55693	0.264261
GRB14	-2.6806	-0.584068	0.571792	1.53265	0.264261
AZIN1	-3.93868	-0.570561	0.585278	1.55112	0.264261
AHI1	-2.88267	-0.567758	0.587962	1.55418	0.264261
	-3.9816	-0.561095	0.591944	1.54778	0.264261
WDR63	-2.5414	-0.559632	0.59156	1.53934	0.264261
	-1.24398	-0.554245	0.595984	1.54057	0.264261
TMEM91	-1.69657	-0.548462	0.601029	1.54329	0.264261
SLC7A9	-3.06517	-0.541575	0.605014	1.53496	0.264261
SMYD3	-1.74832	-0.539782	0.60775	1.54214	0.264261
CD44	-0.796465	-0.529223	0.616388	1.54246	0.264261
	-2.71322	-0.527656	0.616784	1.53751	0.264261
	-2.41323	-0.525391	0.621506	1.55341	0.264261
COQ10B	-3.3966	-0.525345	0.618189	1.53474	0.264261
	-2.88851	-0.520129	0.623051	1.53767	0.264261
TMEM2	-3.26391	-0.510674	0.630783	1.53636	0.264261
CACNG8	-0.600292	-0.508391	0.633823	1.54243	0.264261
PTRHD1	-2.25432	-0.479521	0.66181	1.55694	0.264261
	-2.41183	-0.457985	0.679155	1.54235	0.264261
ACOX1	-4.05565	-0.457141	0.680348	1.54453	0.264261
SERTAD1	-3.49591	-0.450915	0.68745	1.55093	0.264261
	-3.66527	-0.448656	0.689863	1.55223	0.264261
HPX	-3.51038	-0.446917	0.690537	1.54657	0.264261
	-3.35618	-0.445723	0.689411	1.53387	0.264261
	-2.50451	-0.428077	0.710345	1.55273	0.264261
TFEB	-2.47418	-0.41878	0.72057	1.5566	0.264261
SUMF1	-3.63234	-0.397532	0.73966	1.53695	0.264261
PAK1	-3.33194	-0.382124	0.758232	1.54474	0.264261
CST6	-3.00545	-0.371741	0.772276	1.55637	0.264261
LAMP1	-4.38097	-0.369083	0.771663	1.53559	0.264261
	-3.48291	-0.344295	0.804807	1.55201	0.264261
FBXO38	-3.47707	0.357171	0.785868	1.53535	0.264261
	-3.3407	0.366239	0.777065	1.54693	0.264261
GATSL2	-3.20086	0.367965	0.772554	1.53324	0.264261
DHX35	-2.67717	0.389248	0.750184	1.5446	0.264261
CDAN1	-3.2467	0.396769	0.742835	1.54997	0.264261
ACACA	-3.1518	0.402707	0.736301	1.54951	0.264261
	-2.46228	0.42899	0.70608	1.53416	0.264261
	-3.02085	0.429158	0.706421	1.53698	0.264261
KIF3C	-2.24601	0.441505	0.694504	1.53921	0.264261
PRDM10	-2.22991	0.465481	0.671046	1.53649	0.264261
RBL1	-2.8681	0.477682	0.660261	1.53898	0.264261
ACO1	-4.61451	0.48618	0.654282	1.54833	0.264261
	-2.31105	0.488306	0.6536	1.55512	0.264261
	-2.73314	0.498425	0.644885	1.55619	0.264261
MON1B	-3.12341	0.515499	0.627473	1.54066	0.264261
TMEM204	-2.84785	0.518792	0.624082	1.53718	0.264261
EPHB4	-3.567	0.530156	0.615617	1.54243	0.264261
ZNF182	-2.40016	0.534626	0.610206	1.53266	0.264261
	-1.8209	0.567935	0.586934	1.54918	0.264261
FGF9	-2.52486	0.584605	0.572865	1.5408	0.264261
KCND2	-1.08077	0.617204	0.551722	1.55432	0.264261
PAPD5	-3.45548	-0.581225	0.573569	1.53076	0.26364
ABCD3	-3.42699	-0.566866	0.584475	1.531	0.26364
BDKRB2	-2.85996	-0.550169	0.597402	1.53068	0.26364
HCFC1	-2.53103	0.389191	0.747653	1.53023	0.26364
SLC43A2	-4.06315	0.472715	0.663164	1.52994	0.26364
	-1.21094	-0.625492	0.540765	1.52567	0.262366
PRAP1	-2.15869	-0.594183	0.563437	1.5277	0.262366
CHRNE	-0.869119	-0.569985	0.580981	1.52489	0.262366
MUM1L1	-2.1358	-0.563925	0.585569	1.52459	0.262366
AKR1A1	-3.87567	-0.439082	0.694333	1.52508	0.262366
PLA1A	-3.58136	-0.432568	0.700767	1.52477	0.262366
MGST3	-3.35363	-0.356788	0.784439	1.52492	0.262366
	-2.47016	0.398452	0.736287	1.52389	0.262366
PPP1R26	-3.31645	0.433284	0.700584	1.5277	0.262366
IGSF10	-2.44601	0.440784	0.6924	1.52369	0.262366
CHAD	-1.66676	0.558497	0.589905	1.52533	0.262366
RASEF	-1.81663	0.583322	0.570786	1.52407	0.262366
C6orf89	-3.01447	0.37785	0.759021	1.52212	0.261211
CLEC17A	-1.07622	-0.610335	0.55054	1.52086	0.260767
TPM3	-4.05941	0.383097	0.752843	1.52109	0.260767
RBPMS	-3.62354	-0.475033	0.659209	1.51989	0.260216
ASPA	-3.02394	-0.560202	0.587232	1.51795	0.259623
	-4.48481	-0.450487	0.681692	1.51684	0.259623
CU633679.1	-2.46306	-0.406391	0.726595	1.51774	0.259623
NABC1	-2.82425	0.408464	0.724237	1.51694	0.259623
USP5	-3.83286	0.434392	0.697571	1.51727	0.259623
	-2.18315	0.468915	0.664398	1.51749	0.259623
CDH16	-4.47314	-0.42695	0.704722	1.51534	0.258531
OCIAD1	-3.33536	-0.350266	0.790479	1.51414	0.258143
SYNPR	-1.65642	0.605626	0.552714	1.51436	0.258143
ALPHA-1A	-1.61972	0.572935	0.576684	1.51366	0.258073
IL7R	-1.78701	-0.597514	0.558361	1.51323	0.258043
	-1.41018	-0.618608	0.542562	1.50925	0.257575
	-1.65942	-0.616882	0.543652	1.50858	0.257575
MFAP3L	-2.62017	-0.583739	0.568193	1.51161	0.257575
ACSL3	-3.79949	-0.559351	0.58595	1.50739	0.257575
KCP	-2.53284	-0.550727	0.593222	1.51023	0.257575
GPR160	-2.03071	-0.469845	0.662542	1.51207	0.257575
TMEM106A	-3.00314	-0.407022	0.724497	1.50999	0.257575
PBX3	-2.96931	-0.397945	0.734198	1.50948	0.257575
SNX5	-3.65174	-0.393029	0.739222	1.50745	0.257575
PBD-2	-3.26867	-0.378633	0.755391	1.50725	0.257575
FUBP3	-3.58467	0.372806	0.762131	1.50728	0.257575
	-3.60793	0.454652	0.675902	1.5071	0.257575
PAK7	-2.23047	0.497104	0.637294	1.50797	0.257575
EYS	-1.09635	0.618599	0.542228	1.5074	0.257575
ADGRG3	-2.01187	-0.606617	0.550449	1.50593	0.257533
CASQ2	-2.45962	-0.604411	0.552019	1.50586	0.257533
FBXO21	-3.72866	0.342589	0.798693	1.50648	0.257533
SLC10A6	-1.98232	-0.614384	0.544204	1.50204	0.257381
WEE1	-3.04085	-0.601187	0.553579	1.50174	0.257381
	-1.91106	-0.539203	0.601177	1.50357	0.257381
FAM167B	-2.86469	-0.503113	0.631041	1.50237	0.257381
F3	-2.60666	-0.494436	0.63857	1.50223	0.257381
ATP5F1	-3.74872	-0.377054	0.75625	1.50209	0.257381
PLDN	-2.28422	0.431023	0.698551	1.50424	0.257381
TTC9C	-2.42951	0.44028	0.689157	1.50335	0.257381
KLHL20	-2.78799	0.489287	0.643263	1.50302	0.257381
SUV39H1	-2.00275	0.494446	0.638466	1.50172	0.257381
KCNE4	-1.85708	-0.615656	0.542929	1.50001	0.256857
	-2.40594	-0.489383	0.642719	1.50055	0.256857
MOSPD2	-2.4128	-0.432533	0.696269	1.50012	0.256857
STYK1	-1.67049	-0.617481	0.541138	1.49729	0.256644
MMP1	-1.95349	-0.598524	0.555024	1.49914	0.256644
DNAJB1	-4.32839	-0.568482	0.577295	1.49864	0.256644
CYSLTR2	-2.00597	-0.55505	0.587489	1.4976	0.256644
CCDC158	-2.45295	-0.534708	0.60389	1.4986	0.256644
BPHL	-3.64535	-0.438302	0.690095	1.49786	0.256644
TSEN15	-2.39835	0.440229	0.688037	1.49704	0.256644
PLBD1	-2.7259	-0.571925	0.574013	1.49509	0.256265
WBSCR27	-2.43363	-0.53007	0.607071	1.49537	0.256265
DECR1	-3.5878	-0.454803	0.673588	1.4954	0.256265
GPBP1	-3.44558	-0.441244	0.686765	1.49558	0.256265
FHL2	-3.25398	0.460599	0.667926	1.49453	0.256101
	-3.12121	0.475607	0.653648	1.49264	0.254995
CELF5	-1.15639	0.61582	0.541445	1.49266	0.254995
CCL4	-2.19235	-0.547187	0.592512	1.49131	0.254446
	-2.37487	-0.454917	0.672731	1.49139	0.254446
DNAJB4	-3.4463	-0.596867	0.554523	1.48999	0.253692
CIPC	-3.44202	-0.541484	0.596776	1.48978	0.253692
	-1.87947	-0.54352	0.59439	1.48575	0.252951
RGS11	-0.922064	-0.54279	0.595238	1.48716	0.252951
TRA2B	-3.75181	-0.422365	0.704174	1.48711	0.252951
	-3.01729	0.350751	0.784657	1.48602	0.252951
DDX46	-3.69773	0.374319	0.75636	1.48573	0.252951
	-2.63343	0.470142	0.657352	1.48562	0.252951
PYGO1	-2.05681	0.479524	0.648758	1.48555	0.252951
HOXA6	-2.68112	0.519312	0.614454	1.48723	0.252951
	-1.75181	0.566233	0.576602	1.4857	0.252951
FLNC	-3.40088	-0.525156	0.608991	1.48402	0.2518
	-2.07807	-0.611972	0.542405	1.48325	0.251642
LY9	-0.958612	-0.594832	0.554642	1.48272	0.251642
PRKG1	-2.2836	0.477545	0.650018	1.4827	0.251642
HBEGF	-3.30563	-0.601717	0.549277	1.48077	0.251125
CGN	-3.75492	-0.585617	0.560879	1.47983	0.251125
	-0.630061	-0.524488	0.60901	1.48118	0.251125
	-2.38452	-0.510872	0.620226	1.48007	0.251125
PDZK1	-3.36695	-0.495106	0.633932	1.48056	0.251125
SDHB	-3.78806	-0.352973	0.780689	1.4795	0.251125
HSPA4	-3.80217	-0.344264	0.791871	1.48126	0.251125
SFXN1	-3.3994	-0.486246	0.641078	1.47687	0.248877
CYP2C42	-2.64055	-0.522059	0.609966	1.47556	0.247976
DF	-3.11789	-0.361421	0.769606	1.47521	0.247976
ACADS	-3.65529	-0.426202	0.697766	1.47395	0.247483
H2AFZ	-3.10452	-0.356381	0.775536	1.47432	0.247483
MMP9	-2.64888	-0.605691	0.544988	1.4732	0.247269
PRKCA	-3.0205	0.379779	0.747665	1.47298	0.247269
	-2.60194	0.450111	0.673801	1.47257	0.247247
	-1.36002	-0.6095	0.542073	1.47219	0.247241
CAR	-1.58881	-0.610077	0.541007	1.46874	0.247182
	-1.38322	-0.608613	0.542187	1.46946	0.247182
IL21R	-2.83642	-0.558229	0.58002	1.47106	0.247182
HAO1	-3.47441	-0.527646	0.604048	1.46873	0.247182
ARRDC4	-3.29456	-0.440254	0.682857	1.46962	0.247182
ABHD14B	-3.32073	-0.405454	0.718936	1.47129	0.247182
	-2.95544	0.378782	0.748242	1.47	0.247182
NOTCH4	-3.34503	0.511123	0.617884	1.46883	0.247182
	-1.31371	0.607116	0.543476	1.47061	0.247182
SLC23A1	-3.53319	-0.422046	0.700718	1.46709	0.245917
AK5	-1.7194	-0.561207	0.576697	1.46573	0.245386
ENPEP	-3.28982	-0.529978	0.601572	1.46579	0.245386
JMY	-2.60608	0.370936	0.756463	1.46543	0.245386
FGFR4	-1.28178	-0.605676	0.541311	1.45389	0.244666
MNS1	-2.16874	-0.602314	0.544616	1.45851	0.244666
	-1.23623	-0.594555	0.549514	1.45469	0.244666
	-1.76399	-0.581834	0.559395	1.45723	0.244666
RND1	-3.7619	-0.575373	0.564992	1.46113	0.244666
NFKBIE	-2.62279	-0.562067	0.574283	1.45659	0.244666
CCL3L1	-2.11282	-0.557378	0.576441	1.4489	0.244666
ZSWIM6	-3.21253	-0.551129	0.583962	1.46257	0.244666
GLA	-3.23336	-0.549632	0.584474	1.45907	0.244666
	-2.1077	-0.547069	0.586217	1.45757	0.244666
	-2.22682	-0.540383	0.590515	1.45215	0.244666
SLC22A8	-4.74579	-0.531498	0.599077	1.45924	0.244666
	-2.20673	-0.505938	0.619188	1.4525	0.244666
	-2.34505	-0.498299	0.627944	1.46371	0.244666
FAM213B	-2.19412	-0.494506	0.630513	1.45979	0.244666
ARL4A	-2.4165	-0.482814	0.639129	1.45055	0.244666
SCG5	-2.43039	-0.481298	0.641614	1.45637	0.244666
ADORA2B	-2.22572	-0.477221	0.645223	1.45592	0.244666
	-2.12419	-0.445735	0.674714	1.45513	0.244666
	-3.6175	-0.441075	0.6782	1.44953	0.244666
TMEM19	-3.06211	-0.419241	0.701082	1.45386	0.244666
SIRT2	-3.03446	-0.389947	0.73158	1.44888	0.244666
	-2.532	-0.386409	0.73774	1.46033	0.244666
FH	-3.91503	-0.377132	0.747547	1.45643	0.244666
ATP5D	-3.67001	-0.358809	0.770261	1.46209	0.244666
AGTRAP	-3.72564	-0.356122	0.771213	1.45005	0.244666
	-3.1469	-0.353711	0.774213	1.45031	0.244666
	-3.59101	-0.345778	0.785974	1.46025	0.244666
COX7C	-3.76753	-0.342619	0.788078	1.45046	0.244666
SERF2	-3.92426	-0.319898	0.818709	1.45476	0.244666
ATG2B	-3.06162	0.342037	0.789594	1.45449	0.244666
ZNF609	-3.70725	0.357828	0.769126	1.44998	0.244666
	-2.68438	0.378921	0.744301	1.45024	0.244666
ZMPSTE24	-2.54427	0.401392	0.719879	1.45335	0.244666
EFCAB14	-3.45094	0.42129	0.698197	1.44987	0.244666
LNPEP	-2.8944	0.424701	0.695233	1.45267	0.244666
	-2.43331	0.427416	0.693472	1.4579	0.244666
MRVI1	-2.43492	0.428327	0.691126	1.45051	0.244666
ANKRD32	-2.55712	0.444096	0.676918	1.45828	0.244666
ZNF318	-3.29175	0.487609	0.636254	1.45792	0.244666
TTC39A	-3.32036	0.490981	0.632671	1.45484	0.244666
CHML	-2.26709	0.507127	0.618623	1.45487	0.244666
SRGAP1	-2.41776	0.514506	0.613376	1.46022	0.244666
CRY2	-3.30702	-0.579671	0.559288	1.44828	0.244606
ACOT13	-3.08331	-0.480993	0.640296	1.44809	0.244606
CDH7	-1.02982	-0.589582	0.551767	1.44746	0.244435
	-1.49932	-0.588118	0.552469	1.4455	0.244435
	-2.12247	-0.577363	0.560541	1.4458	0.244435
SMPD2	-3.44164	-0.467489	0.652233	1.44587	0.244435
	-2.95135	0.484036	0.637233	1.44642	0.244435
	-2.39164	0.509699	0.61492	1.44706	0.244435
SPOCK3	-2.7439	0.599222	0.544326	1.4454	0.244435
DENND4A	-2.9689	-0.564397	0.570013	1.44377	0.244344
ADAMTS15	-4.02424	-0.488194	0.633155	1.44454	0.244344
FOLR1	-3.51081	-0.356215	0.769817	1.44342	0.244344
FAM117B	-2.778	0.376875	0.745283	1.44316	0.244344
TSSK3	-2.52177	0.378194	0.74382	1.44345	0.244344
	-1.50013	0.575282	0.561931	1.44488	0.244344
ABCC6	-1.89554	-0.573971	0.562375	1.44205	0.243592
B3GALT1	-1.36234	0.594799	0.546779	1.44146	0.243353
	-1.88857	0.497715	0.624019	1.44069	0.242939
IRX5	-1.85196	0.588869	0.550903	1.44029	0.242894
	-2.09869	-0.515262	0.608738	1.43949	0.242452
BCHE	-2.76694	-0.398057	0.720741	1.43908	0.242397
SAFB2	-3.76013	-0.39688	0.721865	1.43825	0.241922
CLHC1	-1.62387	-0.554018	0.576914	1.4378	0.241896
CPT2	-3.37064	-0.448677	0.668447	1.43751	0.241896
DDN	-1.89624	0.503666	0.617822	1.43538	0.240112
ABCD1	-2.83587	0.404652	0.712795	1.43492	0.240016
DCUN1D3	-2.93731	-0.446096	0.670072	1.433	0.239799
	-2.09175	-0.407799	0.709144	1.43346	0.239799
	-2.52885	-0.376313	0.744158	1.43406	0.239799
OXCT1	-3.69102	-0.36148	0.761447	1.43316	0.239799
B3GNT3	-2.82641	0.519992	0.603493	1.43294	0.239799
LRRC16B	-1.52267	-0.599839	0.541377	1.43255	0.239758
ZNF362	-2.56945	0.428693	0.687186	1.43214	0.239704
	-2.61978	-0.50655	0.614634	1.43175	0.239665
	-3.37282	-0.388338	0.729938	1.4312	0.239569
NDUFV1	-3.83334	-0.339745	0.787946	1.43095	0.239569
GCC2	-3.61633	0.368344	0.752695	1.43018	0.239149
	-2.52484	-0.392695	0.724779	1.4296	0.238921
XPNPEP2	-3.96961	-0.443315	0.671824	1.42808	0.237747
NPC1	-3.29155	-0.579363	0.554989	1.42505	0.237452
PPAP2B	-3.55331	-0.547447	0.579687	1.4255	0.237452
MOGAT2	-0.46882	-0.422602	0.691792	1.42395	0.237452
C1orf115	-3.54341	-0.418099	0.697079	1.42717	0.237452
XBP1	-3.63486	-0.413475	0.701562	1.42541	0.237452
CRELD1	-3.08408	-0.40087	0.714831	1.42451	0.237452
PET100	-2.43289	-0.397615	0.718424	1.42478	0.237452
TPD52	-3.62875	-0.3955	0.720647	1.4243	0.237452
PLOD3	-3.678	-0.329475	0.799942	1.42415	0.237452
FAM105A	-2.54611	0.405205	0.710581	1.42665	0.237452
	-1.40254	0.591451	0.546368	1.42681	0.237452
FKBP8	-3.79237	-0.346822	0.777475	1.42323	0.237424
SLC38A4	-1.44664	0.597643	0.541142	1.42324	0.237424
	-2.40658	0.408462	0.706174	1.42193	0.236473
SNORD89	-1.7775	-0.596959	0.541059	1.42029	0.236312
	-0.771479	-0.532786	0.590649	1.4213	0.236312
	-4.03865	-0.477283	0.638341	1.42087	0.236312
ZFAND6	-3.70199	-0.394526	0.720809	1.41969	0.236312
	-2.97522	-0.369226	0.749608	1.41977	0.236312
NUP85	-2.96713	0.483388	0.632786	1.4207	0.236312
	-2.65303	-0.383757	0.732623	1.41866	0.235962
TCF3	-3.34988	0.34226	0.782375	1.41892	0.235962
RAD51B	-1.75809	-0.511553	0.607297	1.41617	0.235511
ARHGAP24	-3.34102	-0.457948	0.655447	1.41656	0.235511
UGCG	-3.27282	-0.451327	0.661735	1.41637	0.235511
KLHL25	-2.28083	-0.409945	0.70366	1.41717	0.235511
AK3	-3.58885	-0.383197	0.73276	1.41614	0.235511
IFT140	-3.03686	-0.383035	0.733103	1.41695	0.235511
	-2.22467	-0.490137	0.625741	1.41552	0.235231
ZFYVE26	-3.32067	0.48232	0.632625	1.41503	0.235076
CXCL14	-2.46003	-0.506876	0.610858	1.41402	0.23441
	-1.64338	0.584327	0.549024	1.41362	0.23435
LRRC66	-1.90916	-0.574298	0.55638	1.4128	0.234091
CFAP20	-3.09982	-0.509931	0.607915	1.41233	0.234091
	-3.37495	-0.355767	0.764323	1.41265	0.234091
	-1.3978	-0.594483	0.540835	1.41007	0.233846
FAM102A	-4.45752	-0.574381	0.555921	1.41081	0.233846
GPRC5A	-3.56165	-0.563622	0.563983	1.41005	0.233846
PPTC7	-3.636	-0.520765	0.598536	1.41109	0.233846
NPL	-3.64555	-0.48733	0.627157	1.41009	0.233846
CPM	-2.58731	0.419704	0.692306	1.41145	0.233846
C-JUN	-4.61641	-0.539183	0.583097	1.40936	0.233786
	-1.85274	0.546875	0.576936	1.40931	0.233786
SPIN3	-1.33948	0.594375	0.540672	1.40885	0.233666
	-1.25913	-0.592841	0.540901	1.40438	0.233604
TRIM15	-1.57242	-0.575538	0.554281	1.40696	0.233604
CCDC173	-2.30271	-0.517572	0.599992	1.405	0.233604
ATP1B1	-4.33984	-0.468515	0.643056	1.40408	0.233604
CPB2	-3.72495	-0.463902	0.647963	1.40713	0.233604
PMVK	-2.91071	-0.419518	0.691805	1.40797	0.233604
PDLIM3	-0.407498	-0.416826	0.694406	1.40699	0.233604
	-2.82476	-0.361694	0.755689	1.40534	0.233604
MRPL28	-3.78794	-0.331146	0.79441	1.40734	0.233604
NADK2	-3.04434	0.432527	0.677899	1.40474	0.233604
	-2.3475	0.450307	0.660536	1.4054	0.233604
APAF1	-1.91509	0.472258	0.639923	1.40569	0.233604
TMEM61	-2.75017	0.482983	0.630375	1.40672	0.233604
MYO18B	-1.30666	0.588585	0.544393	1.4062	0.233604
ARSD	-3.73878	-0.39413	0.717759	1.40218	0.232702
RAD51D	-2.89886	0.372178	0.742735	1.40261	0.232702
7SK	-1.64783	0.551861	0.571599	1.40233	0.232702
MLF1	-3.10703	-0.566186	0.560238	1.40118	0.232513
HS3ST2	-1.19133	-0.531238	0.587922	1.40124	0.232513
ICK	-2.90872	0.474075	0.637313	1.40099	0.232513
C8B	-1.66586	-0.592079	0.540635	1.40026	0.232454
PigE-108A11.6	-1.83903	-0.539816	0.580779	1.40032	0.232454
C2orf40	-1.48965	-0.591397	0.540642	1.39781	0.231661
SRCAP	-3.98291	0.323758	0.802391	1.39825	0.231661
FAM208A	-3.18716	0.352144	0.765844	1.39803	0.231661
STIP	-3.46508	0.363531	0.752093	1.39837	0.231661
	-2.55117	0.508077	0.606849	1.39909	0.231661
TUBE1	-1.99339	0.499588	0.613731	1.39692	0.231105
MEIG1	-1.51475	0.560444	0.563431	1.39504	0.229554
PER1	-1.13859	-0.578061	0.549784	1.39402	0.22886
	-0.770035	-0.49098	0.620525	1.39318	0.228355
CRHBP	-1.56414	-0.579185	0.548359	1.39114	0.227204
SWAP70	-3.43945	-0.516905	0.597412	1.3894	0.227204
GOT1	-3.44174	-0.425514	0.681951	1.38961	0.227204
CYCS	-3.95066	-0.409511	0.698704	1.39012	0.227204
PRSS8	-3.31487	-0.378465	0.732881	1.38981	0.227204
DTX4	-3.03516	0.368218	0.74505	1.39104	0.227204
ALCAM	-2.79466	0.401184	0.707766	1.39081	0.227204
	-2.6028	0.425342	0.682123	1.38959	0.227204
BOK	-2.94712	-0.34725	0.770054	1.38877	0.226907
S100A12	-2.18909	-0.526579	0.588734	1.38631	0.225429
ADORA1	-2.08259	-0.507316	0.604954	1.38648	0.225429
HSPH1	-4.44497	-0.497552	0.613422	1.38662	0.225429
HPGD	-3.05016	-0.531583	0.58433	1.38485	0.224909
SERPINB10	-2.11564	-0.5236	0.590827	1.38448	0.224909
ASB1	-2.87811	0.340322	0.778019	1.38489	0.224909
	-2.9288	0.541392	0.576338	1.3846	0.224909
	-1.96143	-0.537238	0.579255	1.3825	0.224819
	-2.80069	-0.495821	0.614138	1.3827	0.224819
CTSC	-4.50988	-0.351389	0.763682	1.38273	0.224819
TSHZ1	-3.27359	0.366061	0.745888	1.38259	0.224819
	-1.7696	0.514621	0.597922	1.38244	0.224819
MGAT3	-1.94801	0.5379	0.578926	1.38351	0.224819
	-1.12201	-0.586104	0.540671	1.37869	0.224324
SNORD100	-1.2806	-0.584331	0.540913	1.37345	0.224324
CCDC152	-1.17559	-0.584309	0.540955	1.37358	0.224324
OVGP1	-1.85612	-0.569443	0.553571	1.38053	0.224324
RUNX1	-2.37884	-0.558432	0.561507	1.37787	0.224324
ITPKC	-3.43026	-0.555348	0.563421	1.37547	0.224324
	-2.04354	-0.553568	0.564699	1.3749	0.224324
CALB1	-4.08379	-0.531639	0.581158	1.36957	0.224324
MTCL1	-1.86457	-0.528786	0.584148	1.37275	0.224324
	-1.87569	-0.528035	0.586216	1.37984	0.224324
MYRF	-2.44325	-0.52782	0.585494	1.37544	0.224324
DUSP10	-3.11463	-0.523376	0.58812	1.37035	0.224324
CSRP2	-3.4187	-0.498193	0.609161	1.36852	0.224324
	-2.33937	-0.495732	0.611181	1.36789	0.224324
SUSD2	-3.88353	-0.491349	0.614699	1.36625	0.224324
RABGEF1	-3.51228	-0.471054	0.632984	1.36608	0.224324
EZR	-4.49453	-0.469903	0.635943	1.3753	0.224324
	-3.05273	-0.467106	0.637469	1.3701	0.224324
PDK3	-2.5988	-0.452651	0.650564	1.3674	0.224324
GRIK5	-2.93368	-0.440707	0.663746	1.37503	0.224324
PADI3	-0.577164	-0.435694	0.667989	1.37149	0.224324
NFS1	-3.16685	-0.42776	0.676855	1.37581	0.224324
NHS	-2.52637	-0.425596	0.677847	1.36991	0.224324
FRRS1	-2.46243	-0.415552	0.689889	1.37805	0.224324
CCBL2	-3.96443	-0.413734	0.691374	1.376	0.224324
CX3CL1	-2.87914	-0.408356	0.696596	1.37376	0.224324
TCTN1	-2.66403	-0.404517	0.70094	1.37494	0.224324
IGFBP2	-3.10999	-0.399821	0.705672	1.37328	0.224324
SKIL	-3.16581	-0.398804	0.706147	1.37021	0.224324
FAM49B	-3.20732	-0.363231	0.745863	1.36603	0.224324
LAT2	-3.1662	-0.356607	0.754005	1.36676	0.224324
	-2.99249	-0.346227	0.767558	1.37027	0.224324
NDUFA4	-3.6658	-0.344039	0.771655	1.37682	0.224324
ACACB	-3.11168	-0.333188	0.783526	1.36686	0.224324
ADI1	-3.71075	-0.317416	0.804558	1.36672	0.224324
DAB2	-4.57798	0.321066	0.800673	1.37197	0.224324
NR2C2	-3.06588	0.356491	0.755489	1.37328	0.224324
SMC6	-3.2713	0.362129	0.747295	1.36658	0.224324
	-2.74024	0.367566	0.740704	1.366	0.224324
	-2.96136	0.376055	0.732697	1.37528	0.224324
ATP6V0A2	-3.28879	0.378979	0.729267	1.37496	0.224324
	-2.06443	0.438332	0.66453	1.36743	0.224324
NSD1	-3.39263	0.438875	0.665415	1.37434	0.224324
	-2.75946	0.461812	0.644527	1.38039	0.224324
RECQL	-2.72619	0.478376	0.627755	1.37322	0.224324
	-1.96985	0.479043	0.626981	1.37239	0.224324
	-2.76835	0.479106	0.627736	1.37636	0.224324
MRE11A	-2.86894	0.501218	0.608354	1.3774	0.224324
CYBB	-0.713726	0.514861	0.5949	1.36867	0.224324
SOX12	-2.53518	0.543674	0.572407	1.37429	0.224324
MAP2K1	-3.00152	-0.42802	0.674153	1.36396	0.222597
SLA-DQB1	-3.74797	-0.320064	0.800309	1.36362	0.222567
DNAH11	-1.70368	-0.561834	0.554814	1.35819	0.221562
FUK	-2.80362	-0.466807	0.635318	1.35835	0.221562
ACBD4	-2.61749	-0.466174	0.636677	1.36207	0.221562
	-3.05106	-0.430756	0.670949	1.36185	0.221562
RNF128	-3.50389	-0.386178	0.717924	1.35959	0.221562
EPHX1	-4.16552	-0.382313	0.721952	1.35795	0.221562
	-2.90416	-0.341359	0.771095	1.35764	0.221562
PLCG1	-3.47479	0.313377	0.80832	1.35802	0.221562
CNNM3	-3.70116	0.337219	0.77669	1.35906	0.221562
	-3.01745	0.348853	0.76247	1.36152	0.221562
MTIF2	-3.03069	0.351106	0.759043	1.35848	0.221562
GPATCH2	-2.73975	0.394249	0.708598	1.35794	0.221562
ZFP28	-3.17353	0.415027	0.686819	1.36048	0.221562
MOCOS	-1.94599	0.505756	0.600636	1.35894	0.221562
LRRC16A	-3.39157	0.533185	0.578142	1.36108	0.221562
CD80	-0.878428	0.553633	0.561776	1.36097	0.221562
C1orf162	-1.70701	-0.543324	0.568928	1.3561	0.221086
JMJD6	-3.244	-0.436445	0.664063	1.35613	0.221086
MALL	-2.48673	0.486367	0.616987	1.35593	0.221086
SYT16	-0.975808	0.566492	0.550851	1.35638	0.221086
PLA2G4A	-2.51484	-0.406599	0.694606	1.35507	0.220541
SLC39A5	-3.49504	-0.424166	0.67601	1.35399	0.220068
LCP1	-3.6651	-0.333876	0.780016	1.35425	0.220068
EZH1	-3.05788	0.428245	0.671682	1.35316	0.219553
SOX11	-1.5215	-0.569862	0.547496	1.35265	0.219379
	-2.76978	-0.391678	0.71028	1.35238	0.219379
	-1.41453	-0.572065	0.545448	1.35087	0.218617
NFKBIB	-3.56669	-0.39569	0.705548	1.35091	0.218617
BRF1	-2.60056	0.366561	0.738712	1.35069	0.218617
DBI	-4.263	0.468444	0.631957	1.34953	0.218374
IRX3	-2.63887	0.505163	0.5993	1.35009	0.218374
	-2.26923	0.547095	0.564593	1.34973	0.218374
MREG	-1.90737	-0.555875	0.556576	1.34448	0.217832
ANKRD22	-2.57063	-0.549478	0.562165	1.34715	0.217832
SLC9A3	-2.53274	-0.530739	0.577171	1.34685	0.217832
SMOX	-2.93344	-0.516091	0.588501	1.34292	0.217832
PARD6B	-3.69709	-0.504719	0.599022	1.34694	0.217832
CYP1A2	-1.8372	-0.501167	0.601754	1.34534	0.217832
CTH	-3.64676	-0.487255	0.613929	1.3451	0.217832
CHORDC1	-2.96619	-0.484862	0.615678	1.34325	0.217832
STIP1	-4.02048	-0.475211	0.624955	1.34584	0.217832
	-2.59483	-0.412018	0.686502	1.34383	0.217832
BAIAP2	-3.21256	-0.367077	0.737616	1.34838	0.217832
DPP7	-3.12879	-0.331943	0.780557	1.34479	0.217832
	-3.19892	0.332484	0.780467	1.34774	0.217832
TET3	-2.7795	0.382645	0.718721	1.3443	0.217832
	-2.64046	0.389677	0.710579	1.34319	0.217832
ZNF322	-3.01483	0.404882	0.694018	1.34349	0.217832
DYSF	-3.23064	0.422364	0.676134	1.34575	0.217832
TLL1	-0.64528	0.470006	0.629647	1.34541	0.217832
GCM1	-1.53947	0.561063	0.552877	1.34607	0.217832
TET1	-0.951184	0.564537	0.550171	1.34595	0.217832
RHOJ	-3.1088	-0.501023	0.601242	1.34232	0.21783
ST6GALNAC2	-2.70557	0.393858	0.705788	1.34245	0.21783
	-2.8208	-0.523998	0.581492	1.341	0.217416
ADAMTS16	-2.3172	-0.509938	0.593363	1.34128	0.217416
FBXO2	-2.19906	-0.397969	0.701011	1.34118	0.217416
NFIL3	-2.33675	-0.561528	0.550499	1.33649	0.217235
	-2.36688	-0.554841	0.555231	1.33428	0.217235
CIDE-C	-1.80489	-0.544782	0.564412	1.34011	0.217235
SSH2	-3.44933	-0.537841	0.568694	1.33403	0.217235
HSPA4L	-2.31527	-0.534037	0.57162	1.33329	0.217235
	-0.958505	-0.517016	0.585709	1.3334	0.217235
TPPP3	-2.69607	-0.508657	0.592799	1.33345	0.217235
TNFRSF21	-1.92786	-0.490346	0.608217	1.33107	0.217235
HSH2D	-1.99822	-0.490011	0.608564	1.3313	0.217235
HPSE2	-0.576139	-0.483368	0.614431	1.33102	0.217235
NSDHL	-2.79365	-0.458581	0.63875	1.33789	0.217235
NGFRAP1	-3.12816	-0.458176	0.638708	1.33588	0.217235
	-3.57981	-0.44506	0.651242	1.3355	0.217235
PRDX3	-4.16856	-0.405692	0.692026	1.33816	0.217235
PTGES3	-3.95969	-0.391292	0.706602	1.33287	0.217235
C7H15orf24	-3.06519	-0.389347	0.709241	1.33511	0.217235
HACL1	-2.81965	-0.363868	0.737876	1.33154	0.217235
LIPA	-3.98138	-0.349789	0.755251	1.33266	0.217235
	-2.80334	-0.341826	0.766566	1.33886	0.217235
FAM162A	-3.13211	-0.325204	0.787586	1.33588	0.217235
KDM3B	-3.52451	0.314278	0.80201	1.33392	0.217235
CABLES2	-3.08036	0.325664	0.785942	1.33104	0.217235
	-2.84801	0.343317	0.763014	1.33102	0.217235
	-2.5094	0.376636	0.723006	1.33205	0.217235
	-2.89861	0.394256	0.703871	1.33545	0.217235
CBL	-2.54504	0.417612	0.67935	1.33769	0.217235
	-2.39435	0.418631	0.67871	1.33967	0.217235
LHX6	-1.96231	0.487402	0.611086	1.33226	0.217235
PPL	-3.63395	0.513403	0.589817	1.33841	0.217235
STK32B	-2.09578	0.520751	0.582105	1.33114	0.217235
BEST2	-1.67921	0.531606	0.573177	1.33129	0.217235
GULO	-1.8116	0.549519	0.560248	1.3382	0.217235
	-1.46335	0.562328	0.549701	1.33564	0.217235
SCL10A2	-3.05005	-0.486209	0.611728	1.33027	0.217082
BTG1	-3.8234	-0.39947	0.697102	1.33044	0.217082
	-2.96806	-0.389911	0.707025	1.32765	0.217082
IFT57	-3.00763	-0.33626	0.77148	1.32842	0.217082
	-2.99515	-0.325985	0.785102	1.3291	0.217082
IGF1R	-3.89265	0.36808	0.732132	1.32804	0.217082
HAUS5	-2.90927	0.382277	0.715986	1.3294	0.217082
VANGL1	-2.90495	0.393721	0.70314	1.32923	0.217082
	-2.10562	0.452863	0.642323	1.32905	0.217082
KNSTRN	-2.08686	0.456223	0.638872	1.32792	0.217082
	-1.04837	0.564682	0.546359	1.32846	0.217082
MINOS1	-3.48357	-0.346678	0.757929	1.32701	0.216808
	-2.66336	0.368555	0.731306	1.32679	0.216808
	-2.62947	-0.493935	0.60379	1.32516	0.216428
METAP1D	-2.38494	-0.431905	0.661904	1.32438	0.216428
	-2.7581	-0.428611	0.665324	1.32482	0.216428
CUTA	-3.30849	-0.315958	0.797763	1.32485	0.216428
C12orf66	-2.60536	0.392096	0.703953	1.32463	0.216428
	-2.06048	0.437898	0.656105	1.32525	0.216428
FUT1	-2.53652	0.489876	0.60727	1.32467	0.216428
NAA16	-2.9274	0.340938	0.764524	1.32394	0.216281
RINGO	-0.648903	-0.505114	0.593705	1.32345	0.216187
SLC25A33	-2.76089	-0.409868	0.684411	1.32327	0.216187
CLCA4	-1.84241	-0.529344	0.573195	1.3227	0.216108
ATXN7L3B	-3.1121	0.320049	0.791698	1.32261	0.216108
	-1.87191	-0.548398	0.557532	1.32128	0.215061
GPR65	-1.38032	-0.5694	0.540631	1.31858	0.214132
TMEM120A	-2.69497	-0.382112	0.713805	1.31833	0.214132
NUAK1	-3.19324	0.328466	0.77974	1.31943	0.214132
STEAP3	-3.03255	0.459155	0.634205	1.31911	0.214132
TMEM200B	-2.03667	0.485731	0.609788	1.31921	0.214132
SYNGR3	-1.83594	0.487457	0.608164	1.31882	0.214132
CYP2F1	-1.7393	0.504088	0.59361	1.31889	0.214132
	-2.8654	0.421469	0.670918	1.31688	0.212966
IRF1	-4.16332	-0.48282	0.611768	1.31627	0.212909
KSR2	-1.79322	0.568708	0.540658	1.31625	0.212909
F2RL3	-1.18871	-0.552209	0.552376	1.3113	0.211957
CDCP1	-3.33286	-0.518041	0.580504	1.3131	0.211957
	-2.40539	-0.46304	0.628917	1.31156	0.211957
	-2.41982	-0.410943	0.680783	1.31169	0.211957
	-3.61755	-0.377375	0.718249	1.31381	0.211957
TMEM98	-3.18688	-0.368644	0.728122	1.31246	0.211957
YTHDC2	-3.12823	-0.363254	0.734354	1.31169	0.211957
	-0.375492	-0.359472	0.738942	1.31189	0.211957
HINT2	-3.34057	-0.329802	0.776232	1.31132	0.211957
CHRNB1	-2.32451	0.432609	0.658504	1.31186	0.211957
SIM1	-2.44559	0.445249	0.646444	1.31393	0.211957
	-1.99605	0.4847	0.609384	1.31305	0.211957
MYPOP	-2.25279	0.502562	0.593741	1.31338	0.211957
	-2.00571	0.514491	0.583372	1.31255	0.211957
ZCCHC14	-3.18554	0.320009	0.789227	1.31089	0.211824
	-1.87611	-0.565957	0.540899	1.30762	0.210691
CPT1A	-1.25329	-0.565505	0.541012	1.30654	0.210691
	-1.43526	-0.54444	0.557483	1.30647	0.210691
DHX58	-2.10861	-0.535105	0.565148	1.30718	0.210691
STX11	-3.12551	-0.523155	0.575265	1.3086	0.210691
	-3.0405	-0.368168	0.727864	1.30867	0.210691
PRDX5	-3.59132	-0.360428	0.73659	1.30636	0.210691
	-2.78876	0.338287	0.7642	1.30671	0.210691
PECAM1	-3.39037	0.348691	0.751349	1.30812	0.210691
PTPN21	-3.55669	0.367883	0.7281	1.30821	0.210691
AAED1	-3.17415	0.381921	0.711781	1.30795	0.210691
PHYHIPL	-2.67256	0.5435	0.55828	1.30669	0.210691
	-1.22819	-0.564615	0.541434	1.30533	0.210228
NMNAT2	-2.24492	0.426805	0.662997	1.30552	0.210228
CCL16	-2.49027	-0.530384	0.56846	1.30471	0.21017
CLIP1	-3.73565	0.382432	0.710544	1.30493	0.21017
HCFC1R1	-1.81221	-0.563995	0.541068	1.30146	0.209822
BDKRB1	-1.80432	-0.563167	0.540727	1.29699	0.209822
C19orf26	-2.60538	-0.552653	0.549157	1.29811	0.209822
FAM43B	-2.14829	-0.54899	0.552969	1.30233	0.209822
HHLA2	-2.06428	-0.540851	0.559121	1.3008	0.209822
	-1.14935	-0.505418	0.588093	1.29872	0.209822
LRRC32	-3.59744	-0.491261	0.600634	1.29965	0.209822
ENPP2	-3.39995	-0.470826	0.618452	1.29675	0.209822
EMP3	-3.12924	-0.452427	0.635808	1.29695	0.209822
S100A10	-3.10186	-0.409588	0.679843	1.30076	0.209822
	-0.403102	-0.391149	0.700199	1.30237	0.209822
TMEM175	-2.50232	-0.389815	0.700643	1.29762	0.209822
	-2.93816	-0.380282	0.711185	1.29665	0.209822
ADAM19	-3.02026	-0.368219	0.725465	1.29793	0.209822
ECHS1	-4.04742	-0.359883	0.73661	1.30343	0.209822
RPS28	-4.08608	-0.322852	0.782317	1.29678	0.209822
SLC25A30	-3.65248	0.365534	0.728756	1.29844	0.209822
	-2.32313	0.37365	0.720324	1.30351	0.209822
BCL7A	-2.50362	0.381991	0.710406	1.302	0.209822
	-2.97376	0.388414	0.703323	1.30273	0.209822
PARS2	-2.60934	0.401535	0.687549	1.29657	0.209822
PACS1	-3.83067	0.468213	0.621138	1.29798	0.209822
RPA2	-3.02108	0.479773	0.611438	1.30206	0.209822
SPP1	-5.60228	0.492529	0.599691	1.30046	0.209822
SLC39A14	-3.91906	0.501235	0.592173	1.30088	0.209822
	-0.863573	0.519982	0.576016	1.29991	0.209822
	-1.7386	0.52099	0.574716	1.29782	0.209822
	-1.73599	0.560575	0.543878	1.30224	0.209822
SNORD15	-0.82433	-0.509682	0.583578	1.29476	0.208578
	-0.855349	-0.494902	0.595998	1.29312	0.208578
GLS	-3.70664	-0.480687	0.60888	1.29415	0.208578
	-2.57929	-0.348388	0.748468	1.29319	0.208578
ZNF366	-2.85223	-0.344803	0.753057	1.29363	0.208578
UQCRC1	-4.03488	-0.323781	0.780338	1.29345	0.208578
TSPAN17	-3.26294	0.368604	0.724145	1.29399	0.208578
	-2.41832	0.404875	0.683278	1.2935	0.208578
TMEM141	-2.97839	-0.363744	0.729461	1.29195	0.207673
	-1.29226	-0.557976	0.543454	1.29109	0.207172
ROBO1	-2.43085	0.394685	0.693716	1.29062	0.207172
VWA9	-2.12407	0.45289	0.633974	1.29062	0.207172
GATM	-4.55711	-0.540212	0.556795	1.28787	0.204694
PLAU	-3.54372	-0.525506	0.568492	1.28656	0.204301
	-3.39959	-0.449725	0.636239	1.28709	0.204301
SUDS3	-3.37114	0.32167	0.781654	1.28653	0.204301
SLC22A23	-3.75904	0.410072	0.676171	1.28638	0.204301
	-1.53725	-0.550502	0.548186	1.28599	0.204183
GLO1	-3.74214	-0.377405	0.711992	1.28534	0.203799
TIAM1	-1.99333	-0.492097	0.596233	1.28301	0.203275
	-3.29879	-0.43858	0.646378	1.28366	0.203275
	-2.53976	-0.397631	0.688852	1.28323	0.203275
SSPN	-2.62861	-0.345824	0.74971	1.28428	0.203275
TBC1D30	-2.84219	0.407319	0.678215	1.2824	0.203275
	-2.92548	0.413853	0.671274	1.28227	0.203275
	-2.00408	0.447203	0.637707	1.28268	0.203275
	-1.97506	0.482601	0.604816	1.28355	0.203275
	-1.58753	0.532357	0.562179	1.28345	0.203275
SLC10A4	-1.80673	0.558161	0.541322	1.28209	0.203275
ANGPTL1	-1.6838	-0.533443	0.560647	1.28053	0.202796
EGF	-3.05724	-0.525759	0.56701	1.28082	0.202796
CRAMP1L	-3.41843	0.318525	0.784751	1.28126	0.202796
SAMD5	-1.98145	0.505569	0.58396	1.28056	0.202796
	-2.13921	-0.520709	0.570962	1.27974	0.202703
	-3.55014	0.327975	0.771633	1.27936	0.202703
RBMX	-2.49877	0.393675	0.692383	1.27957	0.202703
AGAP3	-1.07967	0.556514	0.542085	1.27976	0.202703
ABHD12	-3.22662	-0.323333	0.777664	1.27864	0.202255
SLIT2	-2.43804	-0.438886	0.644656	1.27727	0.20115
CHST7	-1.32991	-0.554975	0.542522	1.27631	0.200737
EREG	-2.06223	-0.553586	0.543328	1.27505	0.200737
LRRC34	-1.739	-0.523509	0.567554	1.27489	0.200737
TSPAN6	-2.12695	-0.456137	0.627684	1.27625	0.200737
	-2.23321	0.4243	0.658763	1.27471	0.200737
	-2.1393	0.437815	0.645438	1.27602	0.200737
IRX6	-1.42091	0.546736	0.548698	1.27488	0.200737
FOXA1	-1.01641	0.548164	0.547659	1.2753	0.200737
SLC5A9	-1.96531	-0.555031	0.541803	1.27329	0.200528
	-1.56893	-0.554236	0.542599	1.27407	0.200528
	-2.30937	-0.426904	0.655877	1.27368	0.200528
	-2.09045	-0.404111	0.679595	1.27318	0.200528
FUT11	-2.91886	0.400172	0.683844	1.27316	0.200528
AKR1C3	-0.935033	-0.529519	0.561992	1.27219	0.200089
TMEM120B	-2.88555	-0.392723	0.691786	1.27219	0.200089
	-2.11097	-0.456202	0.6263	1.27033	0.198502
SLC27A2	-3.13647	-0.505565	0.581541	1.26971	0.198414
COL1A2	-3.81054	0.421009	0.661072	1.26992	0.198414
AFM	-1.35846	-0.553118	0.541965	1.26733	0.198288
FMO6P	-1.73477	-0.552377	0.542517	1.2672	0.198288
	-0.688076	-0.497667	0.587992	1.26799	0.198288
CCK	-0.503388	-0.407237	0.675075	1.26795	0.198288
PLGRKT	-3.09112	-0.374661	0.711586	1.26929	0.198288
	-2.38683	-0.364224	0.723595	1.26813	0.198288
HSD17B7	-2.77855	-0.361617	0.726707	1.2681	0.198288
MTMR10	-3.62304	0.332429	0.763313	1.26835	0.198288
	-3.09793	0.384354	0.700139	1.26772	0.198288
PIM1	-4.04843	-0.465597	0.616618	1.26664	0.198264
GREM1	-2.15982	0.467909	0.614515	1.26686	0.198264
IL27RA	-1.53429	-0.53469	0.556397	1.26607	0.197955
MYCBPAP	-1.48092	-0.528494	0.56092	1.26368	0.196916
SLC51B	-2.57483	-0.497683	0.587128	1.26421	0.196916
THOC6	-3.13316	-0.404671	0.676976	1.2642	0.196916
GRHPR	-3.40524	-0.354318	0.734561	1.26365	0.196916
PALB2	-2.71638	0.455026	0.62616	1.26473	0.196916
PREX2	-2.27687	0.469154	0.612593	1.26345	0.196916
CHPF2	-3.88954	0.420735	0.659702	1.26257	0.196301
PIK3R1	-2.23742	-0.550269	0.543031	1.26211	0.196104
FAM198B	-2.44317	0.478483	0.603592	1.26146	0.195713
MFSD2A	-1.99618	-0.532721	0.556765	1.2606	0.195119
	-2.25108	-0.463344	0.617237	1.26005	0.195095
NTRK1	-1.17207	0.552418	0.540873	1.26005	0.195095
RPS6KC1	-2.56573	0.351486	0.737043	1.25921	0.194521
MEST	-2.31595	-0.513315	0.572087	1.2571	0.193978
CUX2	-3.03863	-0.486714	0.595233	1.25726	0.193978
SLC19A1	-3.31511	-0.398368	0.682201	1.25716	0.193978
SAR1B	-3.83963	-0.361097	0.725026	1.25788	0.193978
CPXM2	-2.88503	-0.330193	0.763933	1.25811	0.193978
	-2.83771	0.404625	0.67536	1.25684	0.193978
DSPP	-2.08773	0.470882	0.609537	1.257	0.193978
LACTB2	-3.57824	-0.462732	0.616999	1.25647	0.193868
LRRC4	-1.11657	-0.528249	0.559309	1.25567	0.193334
SNX12	-3.25231	-0.315318	0.78311	1.2544	0.192707
LDHB	-3.41857	-0.29722	0.808632	1.25374	0.192707
	-3.35264	0.408506	0.670574	1.25402	0.192707
CAD	-2.96675	0.461004	0.618223	1.2547	0.192707
SWSAP1	-2.52661	0.471817	0.607945	1.25379	0.192707
	-3.78156	0.351508	0.735645	1.25318	0.192399
	-1.79513	-0.508525	0.575204	1.2529	0.192381
SERPINE1	-4.15707	-0.526917	0.559668	1.25243	0.192173
ZNF518A	-2.56191	0.378553	0.703099	1.25162	0.191625
PON3	-1.51392	-0.549844	0.540692	1.25033	0.191128
CDH6	-2.7466	-0.510461	0.572865	1.24988	0.191128
	-2.21168	-0.414638	0.663203	1.25007	0.191128
	-2.42716	0.483101	0.596779	1.24983	0.191128
GPR182	-1.65583	0.496677	0.584743	1.24984	0.191128
	-2.82862	-0.501003	0.58084	1.24924	0.191033
	-1.72493	0.507627	0.575132	1.24922	0.191033
RPS11	-4.59171	-0.294211	0.811927	1.24882	0.191017
PIK3IP1	-3.01045	0.346768	0.740516	1.24869	0.191017
ITGA2	-3.37618	-0.498745	0.582273	1.24692	0.189947
SLC6A18	-4.33451	-0.337553	0.751747	1.24665	0.189947
	-2.84488	-0.315303	0.781302	1.24639	0.189947
UBTF	-3.48876	0.420883	0.655795	1.24607	0.189947
	-0.868677	0.508571	0.573848	1.24714	0.189947
	-0.839203	0.522872	0.561571	1.24612	0.189947
CCNB2	-1.53433	-0.527086	0.557735	1.24459	0.189495
ADCY10	-0.830183	-0.514587	0.56833	1.24534	0.189495
GOLGB1	-4.08491	0.314643	0.781854	1.24483	0.189495
	-2.39854	0.371025	0.710327	1.24508	0.189495
STEAP1	-2.09739	-0.522063	0.561831	1.24432	0.189476
	-2.49506	-0.418173	0.657967	1.24331	0.188729
ITGA5	-3.51635	-0.480098	0.597806	1.2425	0.188679
TNS2	-2.96416	0.389463	0.688669	1.24249	0.188679
	-0.78156	0.507049	0.57414	1.24273	0.188679
MORF4L2	-2.2508	-0.49952	0.580522	1.24223	0.188673
	-2.51528	-0.455464	0.620319	1.24092	0.188617
DEDD2	-3.25519	-0.41955	0.655926	1.24065	0.188617
EPHX2	-4.07055	-0.377977	0.701374	1.24121	0.188617
SLC16A5	-3.44073	0.411342	0.664603	1.24106	0.188617
TEX264	-0.515216	0.416044	0.659635	1.24093	0.188617
	-2.29084	0.429464	0.645783	1.24065	0.188617
DCLRE1C	-2.10313	0.43903	0.636138	1.24031	0.188538
TAT	-1.81289	-0.49252	0.586101	1.23985	0.188389
PTGER1	-1.70536	-0.492111	0.586254	1.23894	0.188389
RASSF1	-3.32106	-0.480872	0.596448	1.23964	0.188389
ACAT1	-3.57683	-0.305404	0.793504	1.23921	0.188389
ATE1	-2.8585	0.36061	0.721267	1.23889	0.188389
	-2.9577	-0.365645	0.715135	1.23841	0.188165
STRADB	-2.83894	-0.34398	0.741342	1.23703	0.188104
	-2.25185	0.394119	0.682485	1.23805	0.188104
ZNF45	-2.46855	0.399954	0.67582	1.23683	0.188104
ZSCAN26	-2.27294	0.414556	0.660399	1.23749	0.188104
	-2.62145	0.432987	0.641519	1.23754	0.188104
	-1.8784	0.473986	0.60212	1.23708	0.188104
	-3.26451	-0.519396	0.562067	1.23569	0.18771
SLC2A11	-3.88028	-0.440796	0.633352	1.23579	0.18771
	-2.5571	-0.435151	0.638786	1.23509	0.18771
RNF43	-1.94606	-0.429697	0.644022	1.23404	0.18771
	-2.93336	-0.398567	0.676724	1.23422	0.18771
TCF7	-2.52645	-0.384798	0.692073	1.23457	0.18771
SPINK2	-0.269672	-0.337001	0.749626	1.23436	0.18771
PLAA	-3.54887	0.364	0.716135	1.23427	0.18771
	-1.58604	0.500441	0.577902	1.23435	0.18771
	-1.46766	0.543075	0.542295	1.23392	0.18771
ZNF354C	-1.8614	0.48719	0.589339	1.23341	0.187459
PLCB4	-1.79251	0.488951	0.587715	1.23317	0.187459
PLK2	-4.14801	-0.51829	0.562028	1.23153	0.187076
FAM84B	-2.47042	-0.353732	0.728081	1.2322	0.187076
	-3.14262	-0.335258	0.751414	1.23236	0.187076
HNRNPH3	-3.67163	-0.29635	0.804834	1.2317	0.187076
CHAF1A	-2.69165	0.46883	0.605689	1.23197	0.187076
	-2.71919	-0.385798	0.690163	1.2312	0.186994
PRPF4	-3.32514	0.310696	0.783975	1.23028	0.186328
PDE10A	-2.03333	-0.464743	0.609011	1.22991	0.186206
	-1.37309	-0.543109	0.540921	1.22813	0.184923
MCOLN2	-2.59512	-0.412286	0.660654	1.22832	0.184923
CASR	-2.6892	-0.530734	0.550811	1.22761	0.184654
LMCD1	-3.02966	-0.534825	0.54711	1.22604	0.184006
EIF2C3	-2.13789	-0.519843	0.559337	1.22556	0.184006
CD55	-2.18495	-0.481572	0.59253	1.22548	0.184006
TMEM154	-1.90534	-0.461837	0.610641	1.22522	0.184006
	-4.18161	-0.419515	0.652477	1.22563	0.184006
	-2.51161	0.381389	0.693797	1.22537	0.184006
	-1.77068	0.466834	0.605976	1.22526	0.184006
CLDN4	-3.95865	-0.517278	0.561108	1.22394	0.183831
SIGLEC5	-2.22622	-0.517024	0.560824	1.22182	0.183831
BHLHE40	-4.17998	-0.512452	0.564916	1.22282	0.183831
FAM46C	-2.99486	-0.508684	0.568272	1.22347	0.183831
SPRY4	-2.52244	-0.504958	0.571243	1.22252	0.183831
PKLR	-2.09649	-0.497435	0.577951	1.22333	0.183831
	-2.07836	-0.468716	0.603905	1.22387	0.183831
ADH5	-3.80554	-0.373118	0.703109	1.22447	0.183831
ECI1	-3.51389	-0.366478	0.71061	1.2232	0.183831
MDH1	-3.21113	-0.356142	0.722878	1.22253	0.183831
DGAT1	-3.00967	-0.330344	0.755472	1.22226	0.183831
ID2	-3.77965	-0.316976	0.773941	1.22452	0.183831
ADAM28	-2.30654	0.41412	0.657219	1.22187	0.183831
WDR66	-0.959209	-0.528021	0.551443	1.2208	0.183276
	-1.66711	-0.520094	0.557818	1.21997	0.183276
ADPRHL1	-2.86018	-0.386858	0.686366	1.22004	0.183276
FAM213A	-3.68614	-0.376774	0.697778	1.21979	0.183276
PTPN18	-3.01412	-0.343202	0.738353	1.21998	0.183276
LDB1	-3.64794	0.325976	0.760798	1.22032	0.183276
PLEKHA7	-3.79248	0.302306	0.793222	1.21899	0.183171
	-2.77113	0.333902	0.750042	1.21895	0.183171
BRD3	-3.70378	0.369822	0.7057	1.21909	0.183171
F12	-1.5024	-0.53978	0.541248	1.21812	0.182585
SLN	-2.54082	-0.52721	0.551139	1.21666	0.181593
ZAN	-1.36257	0.535076	0.544701	1.21664	0.181593
CALM1	-4.18485	-0.343704	0.736654	1.21546	0.180657
	-3.58881	-0.488225	0.584137	1.21511	0.180559
SAT1	-1.22422	-0.538497	0.540798	1.21183	0.180557
HS6ST2	-2.597	-0.420781	0.647895	1.2117	0.180557
SIL1	-2.3173	-0.381145	0.690934	1.21201	0.180557
CH242-363D24.1	-2.5569	-0.359664	0.716629	1.21414	0.180557
	-3.73727	-0.32761	0.756926	1.21311	0.180557
WDR48	-3.13409	0.317521	0.770498	1.21305	0.180557
SIN3A	-3.7007	0.348073	0.730857	1.21414	0.180557
PURG	-2.13031	0.406754	0.662741	1.21222	0.180557
FGD1	-2.64872	0.427764	0.640966	1.21263	0.180557
HPS6	-2.80513	0.446089	0.623119	1.21419	0.180557
	-2.29323	0.476228	0.594148	1.21175	0.180557
GAL3ST3	-1.95267	0.481867	0.589455	1.21352	0.180557
	-2.37858	0.511379	0.563678	1.21369	0.180557
C6orf163	-1.16112	0.538081	0.541389	1.21291	0.180557
ETFDH	-3.71366	-0.38816	0.68288	1.21144	0.180543
RNF152	-3.23675	-0.52747	0.54934	1.20996	0.180039
LONRF3	-0.888956	-0.506717	0.566574	1.20912	0.180039
FREM2	-2.8185	-0.466654	0.602569	1.21007	0.180039
GABARAPL1	-4.28063	-0.361952	0.712785	1.20953	0.180039
MAOA	-3.25417	-0.326918	0.756984	1.20947	0.180039
C5orf24	-2.5238	0.341866	0.737575	1.20951	0.180039
	-2.45419	0.409506	0.659301	1.21006	0.180039
	-1.56377	0.499058	0.57316	1.209	0.180039
	-1.04733	-0.535579	0.541895	1.20651	0.179729
LYZ	-1.96991	-0.527612	0.548373	1.20638	0.179729
EXTL1	-1.9171	-0.52147	0.553588	1.20692	0.179729
UNC-6	-2.0598	-0.442875	0.624769	1.2079	0.179729
ITGAV	-0.663334	-0.419261	0.648616	1.20811	0.179729
CHCHD4	-3.21314	-0.381898	0.688718	1.20628	0.179729
GALT	-2.97792	-0.375947	0.69562	1.20663	0.179729
NAPG	-2.33229	0.363806	0.710045	1.20733	0.179729
ZBED5	-2.97844	0.370577	0.701805	1.20636	0.179729
KLHL42	-2.65613	0.385514	0.684832	1.20715	0.179729
BCL2L13	-3.81543	-0.329994	0.751931	1.20533	0.179013
MRPL42	-2.65003	-0.366805	0.705876	1.20479	0.17896
	-2.44342	0.399936	0.668336	1.20486	0.17896
MUM1L1	-1.28215	-0.535839	0.540809	1.20283	0.178363
	-3.49168	-0.375417	0.695312	1.20276	0.178363
MOB3A	-2.85215	-0.3675	0.704729	1.20343	0.178363
	-2.56075	0.34967	0.726344	1.2035	0.178363
PTCHD3	-0.94067	0.513635	0.559243	1.20306	0.178363
PPARGC1B	-0.881555	0.516437	0.557035	1.20371	0.178363
	-1.84511	-0.478108	0.590184	1.20228	0.178116
TTL	-3.06287	0.411492	0.655208	1.20168	0.177764
PVR	-2.30751	-0.532301	0.542844	1.19931	0.177416
	-1.7562	-0.46753	0.599319	1.19984	0.177416
SUMF2	-2.81567	-0.387694	0.680371	1.19872	0.177416
KPTN	-2.74249	-0.37304	0.697327	1.19965	0.177416
	-2.7727	-0.365495	0.70608	1.19914	0.177416
SUCLG2	-4.10613	-0.356225	0.717566	1.20052	0.177416
BSDC1	-3.43874	0.299548	0.792797	1.2004	0.177416
ZNF292	-2.94011	0.311253	0.775755	1.19876	0.177416
TPBG	-2.43582	0.377001	0.692801	1.1999	0.177416
	-0.856901	0.500678	0.56981	1.20085	0.177416
RLN	-1.58901	0.517899	0.554675	1.19897	0.177416
SPATA17	-1.44891	-0.523135	0.550089	1.19807	0.177001
TST	-3.71953	-0.366309	0.70469	1.19738	0.176547
	-2.7173	-0.370886	0.699129	1.19667	0.176482
	-1.90571	0.459653	0.605981	1.19685	0.176482
	-2.18484	0.460901	0.604744	1.1966	0.176482
CD53	-1.28667	-0.53332	0.540989	1.19504	0.176007
ICAM2	-0.963795	-0.52646	0.546531	1.19471	0.176007
HK2	-2.58642	-0.498408	0.570476	1.19539	0.176007
GJA5	-3.04289	-0.455046	0.609957	1.19519	0.176007
MAPK9	-2.51388	0.374994	0.693913	1.19488	0.176007
MLEC	-3.35457	0.434808	0.629821	1.19563	0.176007
IQUB	-1.32003	-0.533104	0.540795	1.1935	0.175981
ICAM3	-0.761771	-0.481777	0.584909	1.19412	0.175981
AMIGO2	-2.58401	-0.429332	0.634967	1.19414	0.175981
	-2.6228	-0.404477	0.660735	1.19359	0.175981
	-3.89832	-0.352642	0.720316	1.19369	0.175981
BRAP	-2.38039	0.350396	0.722983	1.19323	0.175948
NAALADL1	-3.56786	-0.407711	0.657112	1.19291	0.17586
HDAC6	-4.28539	-0.376587	0.691368	1.19195	0.175137
	-2.05738	-0.389819	0.676172	1.19113	0.174547
	-3.2864	-0.454639	0.609077	1.18993	0.174049
HPN	-3.69138	-0.402838	0.661717	1.19036	0.174049
	-3.33166	0.37046	0.698007	1.18994	0.174049
SYT5	-1.53976	-0.5261	0.545439	1.18895	0.173513
	-2.73827	-0.474165	0.590426	1.18832	0.173513
APOBR	-2.53579	-0.39251	0.672552	1.18852	0.173513
ELMOD3	-3.09159	-0.353687	0.717657	1.18799	0.173513
SELPLG	-2.58589	-0.337512	0.738066	1.18832	0.173513
ZNF671	-2.38984	0.408398	0.655235	1.18817	0.173513
PROCR	-2.44532	-0.475941	0.58856	1.18732	0.173333
EIF1	-4.32059	-0.362351	0.706945	1.18716	0.173333
	-3.06128	-0.324409	0.754969	1.18711	0.173333
	-2.51862	0.407714	0.65558	1.18658	0.173043
	-2.80415	0.434153	0.628224	1.1863	0.172992
VAV3	-3.36864	-0.463158	0.599981	1.18566	0.172968
	-0.606944	-0.40335	0.659985	1.18547	0.172968
	-2.99115	-0.303902	0.783028	1.18587	0.172968
	-1.82913	0.515273	0.553597	1.18534	0.172968
XAF1	-1.91446	-0.51888	0.550409	1.18469	0.172822
BAG3	-4.45652	-0.489657	0.575525	1.18445	0.172822
LIF	-2.51488	-0.476397	0.587367	1.18411	0.172822
	-2.17267	-0.382119	0.683118	1.18404	0.172822
CEP192	-3.0401	0.346822	0.725264	1.18426	0.172822
PRKG2	-3.05824	0.423102	0.638816	1.18381	0.172822
PARD6B	-1.13432	-0.5284	0.541999	1.18258	0.172518
MPP2	-2.32478	-0.403953	0.658647	1.18264	0.172518
CUBN	-4.56226	-0.344888	0.727398	1.18305	0.172518
SLC30A6	-2.32193	0.362778	0.705367	1.18277	0.172518
B4GALT7	-3.25656	0.377778	0.687492	1.18162	0.171791
	-3.1892	-0.494327	0.570405	1.18035	0.170985
APOA4	-4.38777	-0.454107	0.607274	1.1804	0.170985
CCDC107	-2.31163	-0.409639	0.651919	1.17994	0.170808
RDH16	-3.22959	-0.495444	0.569185	1.17937	0.170465
	-3.12169	-0.336521	0.737078	1.179	0.170328
JARID2	-3.12184	-0.478743	0.583898	1.17863	0.170187
EVA1C	-2.16605	-0.468233	0.593403	1.17808	0.169864
DMGDH	-4.34124	-0.400522	0.661074	1.17741	0.169424
ERCC3	-3.30582	0.325694	0.750781	1.17696	0.169331
DMRT2	-1.8738	0.526485	0.54218	1.17685	0.169331
RIF1	-3.15353	0.295006	0.793673	1.1766	0.169307
TPP1	-4.20666	-0.388037	0.674446	1.17585	0.168784
BSPRY	-2.77563	0.375474	0.688645	1.17546	0.168631
HGF	-2.44024	0.402934	0.657795	1.17466	0.168419
PLK4	-2.07096	0.444864	0.614833	1.17479	0.168419
	-1.71983	0.468695	0.591946	1.17388	0.168419
	-2.60026	0.480814	0.580867	1.17391	0.168419
DEPTOR	-1.73773	0.52125	0.545895	1.1743	0.168419
ssc-mir-421	-1.15169	0.526939	0.54112	1.17406	0.168419
CDH20	-0.66423	-0.469768	0.590897	1.17365	0.168418
MXD1	-3.08181	-0.520125	0.546607	1.17338	0.168383
	-1.17379	-0.525908	0.541326	1.17143	0.168323
CYP27B1	-3.58893	-0.489901	0.572118	1.17139	0.168323
FRMD4B	-3.23333	-0.485097	0.576421	1.17149	0.168323
COL26A1	-1.66553	-0.478506	0.582537	1.1722	0.168323
HABP4	-3.82919	-0.474503	0.585894	1.17102	0.168323
FZD4	-3.83286	-0.450424	0.608639	1.17153	0.168323
FAM195A	-3.1033	-0.411155	0.648476	1.17243	0.168323
PIK3R5	-2.83214	-0.363941	0.701391	1.17219	0.168323
DNAJB2	-3.27897	-0.320665	0.756033	1.17082	0.168323
RNF219	-2.87928	0.429517	0.629209	1.17124	0.168323
	-2.15886	0.451988	0.607432	1.17274	0.168323
THBD	-3.82604	-0.502084	0.56111	1.17001	0.168151
ORAI1	-3.0819	-0.334189	0.737826	1.16974	0.168151
	-1.98237	0.422057	0.636575	1.17026	0.168151
ZNF396	-1.97365	0.451577	0.607135	1.16993	0.168151
CNIH2	-1.06798	-0.521384	0.543406	1.16466	0.167916
TXLNG	-1.4081	-0.510626	0.552841	1.16619	0.167916
	-3.6184	-0.456623	0.602118	1.16916	0.167916
YWHAG	-3.97203	-0.429398	0.627867	1.16532	0.167916
ARL3	-2.20027	-0.407318	0.650855	1.16556	0.167916
IGKV-11	-2.52087	-0.389932	0.670459	1.16823	0.167916
	-3.60773	-0.377899	0.683939	1.16769	0.167916
ALDH9A1	-4.29811	-0.363233	0.701165	1.16784	0.167916
TBC1D7	-2.952	-0.355072	0.710452	1.16549	0.167916
B4GALT3	-3.46023	-0.298337	0.786386	1.1668	0.167916
KCTD2	-2.83623	0.324721	0.749025	1.16454	0.167916
FBXO3	-2.79744	0.332192	0.739274	1.16506	0.167916
	-3.09264	0.340395	0.729433	1.16811	0.167916
NIPAL3	-3.09912	0.343189	0.725352	1.16595	0.167916
NFATC2IP	-3.10692	0.380137	0.680923	1.16587	0.167916
NFXL1	-2.70006	0.412586	0.64546	1.16632	0.167916
RAPGEF5	-3.09345	0.433735	0.623358	1.16473	0.167916
ANLN	-2.18668	0.44813	0.609539	1.16619	0.167916
C16orf59	-2.4751	0.458056	0.600634	1.16866	0.167916
EPHA7	-1.69991	0.472463	0.586495	1.16586	0.167916
	-1.99548	0.476305	0.58277	1.16503	0.167916
ACACA	-1.29743	0.516051	0.54817	1.16587	0.167916
	-3.85881	-0.331149	0.74026	1.16353	0.167351
MFNG	-2.51199	0.481465	0.57776	1.16369	0.167351
PLET1	-2.0384	-0.52119	0.54271	1.1612	0.166703
CDADC1	-3.41841	-0.464014	0.593165	1.16116	0.166703
AFTPH	-2.88531	-0.34426	0.722904	1.16154	0.166703
UGPP	-2.72052	-0.334521	0.735391	1.16164	0.166703
NDUFC1	-3.04144	-0.327959	0.744168	1.16234	0.166703
SNAP47	-2.78954	0.339123	0.729315	1.16106	0.166703
SYDE1	-2.86214	0.359174	0.704318	1.16087	0.166703
	-2.46457	0.410307	0.646568	1.16108	0.166703
ANO3	-1.91057	0.433517	0.622653	1.16101	0.166703
	-1.7604	-0.517828	0.545347	1.1605	0.166597
SLC30A10	-1.19084	-0.476091	0.58156	1.15936	0.166597
TNFRSF12A	-4.08774	-0.457932	0.598188	1.15832	0.166597
NAB1	-3.10683	-0.347562	0.71808	1.15881	0.166597
CLPP	-3.01354	-0.340325	0.727353	1.15935	0.166597
ATP5G3	-3.86712	-0.32259	0.750673	1.15966	0.166597
COX6C	-3.72956	-0.283434	0.806669	1.15884	0.166597
TUBA1B	-4.27313	0.354869	0.709127	1.15914	0.166597
DESI1	-3.28724	0.433788	0.621775	1.15857	0.166597
	-2.11652	0.459017	0.597452	1.15949	0.166597
VWA7	-1.43376	0.52128	0.541944	1.15842	0.166597
EMC6	-3.26094	-0.295048	0.78903	1.15805	0.166555
	-1.7425	-0.477684	0.579599	1.15732	0.166261
TRBV27	-0.784337	-0.449869	0.605669	1.15738	0.166261
	-2.79294	-0.397918	0.658813	1.15678	0.165951
PARK2	-1.84675	-0.517029	0.54494	1.15618	0.165921
	-1.64184	-0.506441	0.553372	1.15396	0.165921
PLAT	-3.99473	-0.502525	0.55577	1.15008	0.165921
SLC17A4	-1.77044	-0.494585	0.563281	1.15244	0.165921
NT5C3A	-2.92658	-0.437294	0.616086	1.1498	0.165921
TFPI2	-4.32577	-0.430808	0.623106	1.15192	0.165921
MGP	-3.0189	-0.419715	0.63404	1.15034	0.165921
	-0.477088	-0.412905	0.642102	1.15416	0.165921
TRAF3IP1	-3.29537	-0.404921	0.650117	1.15231	0.165921
KIF12	-3.51047	-0.402787	0.65214	1.15122	0.165921
SLAMF1	-1.97012	-0.399803	0.65494	1.14951	0.165921
MMP8	-2.3107	-0.353786	0.708522	1.15141	0.165921
F2	-3.29433	-0.352907	0.710077	1.15331	0.165921
	-3.40069	-0.342751	0.722373	1.15176	0.165921
TSPAN4	-3.25342	-0.340419	0.72653	1.15653	0.165921
PTGES	-3.0508	-0.339017	0.727777	1.15435	0.165921
ATP5B	-2.81385	-0.335904	0.731073	1.15151	0.165921
BETA-ACTIN	-5.06699	-0.335485	0.731422	1.15075	0.165921
	-2.71916	-0.33515	0.732335	1.15265	0.165921
	-0.223972	-0.311648	0.76347	1.1509	0.165921
DIS3	-2.69101	0.332936	0.735654	1.15441	0.165921
DENND1B	-2.37621	0.337054	0.729778	1.15227	0.165921
FAM114A1	-3.01481	0.353366	0.709561	1.1535	0.165921
LTBP1	-3.75925	0.359932	0.701285	1.15238	0.165921
PATZ1	-2.22108	0.377787	0.680914	1.155	0.165921
	-2.73234	0.39445	0.662331	1.15565	0.165921
SPIRE2	-3.31886	0.397236	0.65878	1.15367	0.165921
TNIK	-3.08553	0.398281	0.656727	1.15004	0.165921
NMT2	-2.965	0.42872	0.624649	1.14966	0.165921
	-1.65152	0.463283	0.592444	1.15551	0.165921
C19orf60	-1.66444	0.466814	0.587817	1.15021	0.165921
CEP70	-2.90505	0.480049	0.576886	1.15504	0.165921
	-1.68395	0.485259	0.571435	1.15199	0.165921
CD69	-1.55718	-0.488637	0.567618	1.14879	0.165635
	-3.17628	0.349865	0.712716	1.14884	0.165635
BIRC6	-3.58951	0.312647	0.761485	1.14853	0.165594
[truncated: 17,221 more rows]

## Sheet:  Table S3
Gene	BaseMean	log2FoldChange	lfcSE	pvalue	padj
HSPB1	-2.43195	-2.67694	0.596206	25.3605	21.0768
HSPB1	-2.68087	-2.15326	0.553223	13.857	9.8729
SLC16A3	-3.22566	-1.38676	0.724301	12.7033	8.8962
CH242-238L13.2	-2.66638	-1.49251	0.64305	10.2716	6.59007
CXCL13	-2.25569	-1.04291	0.698261	6.71444	3.12981
PDZD3	-3.34631	-1.18082	0.622366	6.12843	2.62253
VMO1	-2.06223	-1.0338	0.670466	5.88941	2.44931
	-1.83994	-1.31988	0.540805	5.34294	2.06438
CXCL8	-2.28949	-1.31293	0.540816	5.29328	2.06438
	-2.27336	-1.31282	0.541705	5.31158	2.06438
IL1R2	-1.93847	-1.30997	0.540681	5.26922	2.06438
IL1B	-2.42641	-1.28216	0.552966	5.33348	2.06438
ADM2	-2.56994	-1.15354	0.592435	5.1945	2.02464
SELL	-2.7484	-0.933669	0.676079	5.02319	1.88547
LTB4R	-1.56918	-1.19541	0.56381	4.92445	1.84305
	-3.35914	-1.10925	0.596516	4.92812	1.84305
TNFAIP6	-1.43999	-1.2569	0.540676	4.8962	1.84234
SLC30A2	-2.95426	-1.10843	0.589493	4.78252	1.75326
RASL10A	-2.14799	-1.0962	0.587186	4.64589	1.66205
BAIAP2L2	-3.29632	-1.04439	0.607063	4.62342	1.66205
SETBP1	-2.83457	0.81757	0.714081	4.63639	1.66205
A1CF	-2.39165	-1.11887	0.573134	4.54821	1.60756
	-3.13841	-0.993369	0.623593	4.52724	1.60464
CCL2	-3.69989	-1.14589	0.56008	4.49894	1.59607
UNC5D	-2.00178	1.15947	0.553901	4.48017	1.59444
FAM71A	-1.53356	-1.18181	0.541489	4.40561	1.54938
UPP2	-3.30365	-1.13154	0.560122	4.4023	1.54938
	-2.33366	0.773008	0.721198	4.32422	1.48748
	-2.60105	-1.03708	0.591926	4.29585	1.47411
	-2.31964	-1.15609	0.542802	4.26201	1.45532
ACTC1	-2.05208	-1.13797	0.544536	4.17457	1.38244
AKR1C3	-2.72627	-0.936407	0.624176	4.09152	1.31271
ADAM12	-2.35695	0.83849	0.66722	4.01144	1.25522

## Sheet:  Table S4
RASL10A
Primer pair 1
	Sequence (5'->3')	Template strand	Length	Start	Stop	Tm	GC%	Self complementarity	Self 3' complementarity
Forward primer	GCATTTGGGGTAAACCTGGAA	Plus	21	462	482	58.75	47.62	4	2
Reverse primer	GCCACTCCTCCAAGCTTAAT	Minus	20	643	624	57.57	50	6	2
Product length	182
Exon junction	636/637 (reverse primer) on template XM_021073283.1
Products on intended target
Primer pair 2
	Sequence (5'->3')	Template strand	Length	Start	Stop	Tm	GC%	Self complementarity	Self 3' complementarity
Forward primer	TTGCATTTGGGGTAAACCTGGAA	Plus	23	460	482	60.95	43.48	4	2
Reverse primer	GCCACTCCTCCAAGCTTAATTC	Minus	22	643	622	59.31	50	6	2
Product length	184
Exon junction	636/637 (reverse primer) on template XM_021073283.1
Products on intended target
PDZD3
Primer pair 1
	Sequence (5'->3')	Template strand	Length	Start	Stop	Tm	GC%	Self complementarity	Self 3' complementarity
Forward primer	CAAGGCGAGGAGGGAATTGG	Plus	20	109	128	60.75	60	4	0
Reverse primer	CAGGGATCAGAAGGATCGAGG	Minus	21	211	191	59.38	57.14	4	0
Product length	103
Exon junction	204/205 (reverse primer) on template XM_021062959.1
Products on intended target
Primer pair 2
	Sequence (5'->3')	Template strand	Length	Start	Stop	Tm	GC%	Self complementarity	Self 3' complementarity
Forward primer	CCCTGTAAGTGCCCTGCTAT	Plus	20	77	96	59.16	55	4	2
Reverse primer	CTCCAGGGATCAGAAGGATCG	Minus	21	214	194	59.38	57.14	4	2
Product length	138
Exon junction	204/205 (reverse primer) on template XM_021062959.1
Products on intended target
LTB4R
Primer pair 1
	Sequence (5'->3')	Template strand	Length	Start	Stop	Tm	GC%	Self complementarity	Self 3' complementarity
Forward primer	TGGTACTTCCTCTCTGGCTGA	Plus	21	1924	1944	59.92	52.38	4	3
Reverse primer	CCATTGCAAGGACAGGCTTT	Minus	20	2088	2069	59.03	50	6	3
Product length	165
Exon junction	2075/2076 (reverse primer) on template XM_013978181.2
Products on intended target
Primer pair 2
	Sequence (5'->3')	Template strand	Length	Start	Stop	Tm	GC%	Self complementarity	Self 3' complementarity
Forward primer	CTGGGACAGTGCTTATCTGGG	Plus	21	1986	2006	60.13	57.14	3	0
Reverse primer	CCATTGCAAGGACAGGCTTT	Minus	20	2088	2069	59.03	50	6	3
Product length	103
Exon junction	2075/2076 (reverse primer) on template XM_013978181.2
Products on intended target
IL1B
Primer pair 1
	Sequence (5'->3')	Template strand	Length	Start	Stop	Tm	GC%	Self complementarity	Self 3' complementarity
Forward primer	CCAATTCAGGGACCCTACCC	Plus	20	7	26	59.45	60	7	1
Reverse primer	GTTTTGGGTGCAGCACTTCAT	Minus	21	180	160	59.93	47.62	7	3
Product length	174
Exon junction	165/166 (reverse primer) on template NM_214055.1
Products on intended target
Primer pair 4
	Sequence (5'->3')	Template strand	Length	Start	Stop	Tm	GC%	Self complementarity	Self 3' complementarity
Forward primer	GCCAGTCTTCATTGTTCAGGTTT	Plus	23	33	55	59.68	43.48	3	0
Reverse primer	CCAAGGTCCAGGTTTTGGGT	Minus	20	191	172	60.11	55	4	0
Product length	159
Exon junction	51/52 (forward primer) on template NM_214055.1
Products on intended target
SLC16A3
Primer pair 1
	Sequence (5'->3')	Template strand	Length	Start	Stop	Tm	GC%	Self complementarity	Self 3' complementarity
Forward primer	GCCCTTTAGAGCCAGCTGAA	Plus	20	663	682	60.04	55	6	2
Reverse primer	GGTTCCGCGTCCCTGG	Minus	16	813	798	59.71	75	4	3
Product length	151
Exon junction	801/802 (reverse primer) on template XM_021066368.1
Products on intended target
Primer pair 2
	Sequence (5'->3')	Template strand	Length	Start	Stop	Tm	GC%	Self complementarity	Self 3' complementarity
Forward primer	AGGTAACCTGAGACCTGGCT	Plus	20	625	644	59.88	55	7	3
Reverse primer	TGGTTCCGCGTCCCTGG	Minus	17	814	798	61.75	70.59	4	3
Product length	190
Exon junction	801/802 (reverse primer) on template XM_021066368.1
Products on intended target
AKR1C1
Primer pair 1
	Sequence (5'->3')	Template strand	Length	Start	Stop	Tm	GC%	Self complementarity	Self 3' complementarity
Forward primer	ACCTTTGTACCTGAAGAGGTTTCT	Plus	24	75	98	59.59	41.67	4	2
Reverse primer	AGTGCCCAATCCCAGCATAG	Minus	20	220	201	59.82	55	3	2
Product length	146
Exon junction	92/93 (forward primer) on template NM_001044618.1
Primer pair 3
	Sequence (5'->3')	Template strand	Length	Start	Stop	Tm	GC%	Self complementarity	Self 3' complementarity
Forward primer	AGTCCATGGATCCCCAAACC	Plus	20	5	24	59.37	55	8	0
Reverse primer	TGTTGAGAGAAACCTCTTCAGGTA	Minus	24	105	82	59.1	41.67	4	2
Product length	101
Exon junction	92/93 (reverse primer) on template NM_001044618.1
Products on intended target

## Sheet:  Table S5
T: T: Accession	T: T: Description	Non-RIC 1	RIC 1	Non-RIC 2	RIC 2	Non-RIC 3	RIC 3	Non-RIC 4	RIC 4	Non-RIC 5	RIC 5	Non-RIC 6	RIC 6	Non-RIC 7	RIC 7	Non-RIC 8	RIC 8
A0A287AE24	Ig-like domain-containing protein OS	-0.248444	0.161341	-0.714705	-0.746935	1.00389	0.158181	0.172348	-0.400914	0.316812	-0.229694	-0.563574	-0.0599995	0.0599995	0.311132	1.11971	-1.86093
P62802	Histone H4 OS	-0.689892	-0.219532	0.266165	0.249847	0.0349565	0.507172	0.441638	-0.0349565	-0.0755035	0.115213	-0.751521	0.478283	-0.505467	0.0570075	-0.0433105	-1.58861
Q29550	Liver carboxylesterase OS	0.4119	0.563178	-0.124939	0.0652941	0.622855	0.916531	-0.257018	-0.015271	-0.183978	-0.368818	-0.469837	-0.164029	0.351445	0.358985	0.015271	-2.53356
P12069	Lysozyme C-3 OS	-2.12907	-0.506822	-1.81775	-0.238888	-0.706493	0.00259049	0.213859	0.489493	0.498078	1.24843	0.308921	0.621059	-0.00259049	-0.475272	0.632243	-1.10658
I3LM30	Uncharacterized protein OS	-1.42196	0.125051	-0.519425	-0.126369	0.015557	0.408002	0.273452	0.673583	-1.1944	-1.2904	-1.33407	-0.015557	0.024895	0.111341	0.0341731	-2.55874
P12068	Lysozyme C-2 OS	-0.340082	0.451544	-1.33051	-0.526429	0.0614445	-0.208003	-0.0614445	0.442638	0.180051	0.287158	0.22099	0.474663	-0.19058	0.194712	-0.623626	-2.27804
A0A287B3U6	Uncharacterized protein OS	-0.187586	0.171525	-0.285888	0.333194	0.0566088	0.59663	0.113809	0.523579	-0.494475	-0.284039	-0.700926	-0.0492967	0.245053	-0.387407	0.0492967	-2.17212
I3L8P8	Uncharacterized protein OS	-3.55942	0.200979	-1.82246	-0.130464	0.346359	0.792047	0.616934	0.923927	-1.45162	-2.37301	-2.84249	0.0731104	-0.0731104	0.3878	0.115274	-2.52663
P12067	Lysozyme C-1 OS	0.77664	0.07747	0.261631	0.612042	-0.240749	0.362619	-0.496803	0.277524	-0.691204	-1.3277	2.45763	0.203826	-0.07747	-0.832935	-0.793155	-2.6172
F1STC2	Ig-like domain-containing protein OS	0.0184975	0.212968	-0.875898	-0.809548	0.754731	-0.119371	-0.180947	-0.298873	0.233566	0.283053	0.149345	-0.0184975	0.663083	-0.511815	1.52529	-1.52507
P15175	Cathelin OS	-1.78392	-0.311187	-1.42424	-0.77653	-0.225099	-0.103459	-0.205296	0.103459	0.246788	1.19168	0.120481	0.512428	1.23393	0.722425	1.80253	-2.13172
A0A287AFA5	HATPase_c domain-containing protein OS	2.30844	2.77576	-0.169022	0.165397	-0.124109	0.124109	0.272151	0.622772	2.2753	1.80073	-0.194911	-0.206571	-0.284741	-0.937701	-0.278571	-2.5521
A0A286ZK48	PDZ domain-containing protein OS	-0.83767	0.403338	-0.598928	-0.0726071	0.199324	0.573012	0.338487	0.666561	-0.673407	-0.762064	-1.09803	0.0726071	0.296423	-0.347662	0.475129	-2.34196
A0A075B7J0	Ig-like domain-containing protein OS	0.296445	-0.0166008	-1.44956	-1.28975	-0.167756	-0.476605	0.0180919	-0.429096	0.121597	0.472094	-0.315809	0.0166008	0.538021	0.461172	0.756547	-1.1359
A0A286ZKM8	WH1 domain-containing protein OS	-0.223971	0.111414	-0.0472836	0.136032	0.0982868	0.382268	0.155175	0.508701	-0.395339	-0.670681	-0.404653	0.0540984	-0.0917234	-0.346059	0.0472836	-2.67519
F1SEN8	PDZ domain-containing protein OS	-0.0246111	0.691868	0.146356	0.0246111	0.62362	0.664955	0.168425	0.477705	-0.611139	-0.91034	-1.03088	-0.249353	-0.0340301	-0.733683	0.422535	-2.52451
A0A286ZQF6	Uncharacterized protein OS	0.340549	0.118156	-0.51261	-0.996487	0.23825	0.048017	0.42126	-0.744947	-0.080225	-0.648047	-0.685447	0.436071	-0.048017	0.65674	1.52251	-1.24013
A0A287BIK2	Uncharacterized protein OS	-0.676243	0.32257	-0.30395	-0.0430562	0.188269	0.472435	0.389846	0.460613	-0.961276	-1.08497	-1.10719	0.0430562	0.304648	-0.329846	0.438869	-1.71472
A0A287BMA5	Histone domain-containing protein OS	-0.672249	0.11473	-0.660296	-0.0579797	0.146379	0.568205	0.155875	0.0579797	-0.0737477	0.875428	-0.274114	0.251348	-0.360438	-0.439946	0.138189	-2.10906
A0A286ZRV9	Ig-like domain-containing protein OS	-0.596807	0.122721	-1.16404	-0.470002	0.894252	0.248638	0.275342	0.0016855	0.780134	0.251473	-0.551642	-0.0016855	-0.559071	-0.239628	0.43346	-1.41055
F1SQ14	UBIQUITIN_CONJUGAT_2 domain-containing protein OS	-0.337913	-0.0422409	-0.428048	0.0422409	0.0761535	0.485716	0.165158	0.532137	-0.0693869	0.107862	0.0906531	0.193647	-0.0986979	-0.596682	-0.0823409	-2.47425
A0A286ZRB3	Histone domain-containing protein OS	-2.00963	-0.191196	-0.511004	0.40054	0.0432689	0.603005	0.441619	-0.0141226	0.143574	0.0141226	-1.20827	0.376693	-1.47543	0.478364	-0.0567821	-1.73269
A0A287BDV3	Ig-like domain-containing protein OS	-0.045483	0.448722	-1.61702	-1.15968	1.21787	-0.007466	0.099182	0.007466	1.39509	1.97508	-0.465022	-0.605621	0.251185	-0.745681	0.939998	-2.3559
A0A287BIA5	Uncharacterized protein OS	-0.999231	0.440458	-0.457606	0.0682695	0.27472	0.742113	0.580105	0.993168	-0.2329	-0.459925	-0.464571	0.558514	-0.0682695	-0.318631	0.21059	-2.30607
F1SNX3	Uncharacterized protein OS	-1.48295	0.153525	-0.912799	-0.578189	-0.070038	0.147965	0.302824	0.070038	-0.660529	-0.672809	-0.450416	0.359202	1.02668	0.208371	0.860904	-1.00014
A0A075B7I5	Ig-like domain-containing protein OS	-1.93001	0.250449	-1.37172	-0.823087	0.685027	0.333688	0.607958	0.250449	-0.250449	-0.902527	-1.4778	0.682437	-0.366339	1.579	1.63097	-1.33977
A0A287BAB5	Uncharacterized protein OS	-1.14553	0.193191	-0.584416	0.0397031	0.220974	0.740257	0.473928	0.756621	-0.0397031	-0.426243	-0.822928	0.363116	-0.164235	-0.362024	0.106479	-2.52607
A0A286ZSP8	Gamma-interferon-inducible protein 16 isoform 1 OS	-1.61997	0.503572	-1.37456	-0.161404	0.162609	0.809627	0.671059	0.876338	-0.378591	-0.516297	-1.39894	0.0334127	-0.0334127	0.0664415	0.705778	-2.42375
A0A286ZN89	PDZ domain-containing protein OS	-0.307801	0.015202	-0.344097	0.146571	0.0796438	0.346554	0.203003	0.480223	-0.668325	-0.684522	-0.293535	0.0782732	-0.015202	-0.355167	0.086478	-2.71272
A0A287AMY4	Uncharacterized protein OS	-2.17238	0.651486	-1.30851	-0.496873	0.435197	0.531738	0.42845	1.31415	-1.58059	-2.02311	-1.87667	-0.0621713	0.280199	0.0621713	0.695236	-2.33123
A0A287B4H3	Fe-S_biosyn domain-containing protein OS	-0.18217	0.390957	-0.807471	0.0280474	0.189798	0.414531	0.298957	0.93004	-0.959781	-0.470891	-0.296175	-0.0280474	0.459421	-0.523678	0.17331	-2.1335
A0A287A725	ATP synthase subunit OS	-0.657281	0.262286	-0.396933	-0.105681	0.271985	0.307786	0.284017	0.522073	-0.54659	-0.223384	-0.481997	0.105681	0.127213	-0.529642	0.16414	-2.39502
P35479	Leukocyte cysteine proteinase inhibitor 1 OS	-0.538788	0.510942	-0.861438	-1.2443	0.152954	0.766275	0.23641	1.00214	-1.25376	-1.41954	-1.02595	-0.152954	0.891708	0.895992	2.00611	-1.33176
A0A287B1C1	Uncharacterized protein OS	-1.05734	0.542152	-0.716141	-0.162813	0.162813	0.433885	0.307139	0.655324	-0.620562	-0.438359	-0.653299	0.199943	0.280149	-0.681964	0.373645	-2.24775
A0A287B9Z6	PDZ domain-containing protein OS	-2.42485	1.01603	-0.777662	0.158121	1.35064	1.5885	1.18278	1.05075	-0.963642	-1.12208	-1.32603	0.115375	-0.115375	-0.583692	0.45853	-2.73472
A0A287A284	Uncharacterized protein OS	-0.105165	0.117922	0.0233319	0.376324	0.214495	0.564178	0.1576	0.609281	-0.121448	-0.801158	-0.198814	-0.0233319	-0.445015	-0.392694	0.0570037	-3.17652
P16225	Sodium/potassium ATPase inhibitor SPAI-2 OS	-2.73279	-0.0370955	-2.36475	-1.20227	1.07809	1.45484	0.140001	1.89918	-1.12742	0.0370955	-0.531687	0.796663	-0.547868	-0.693255	0.19775	0.353952
A0A287AG77	Uncharacterized protein OS	-0.807554	0.635062	-0.471706	-0.344125	0.215571	0.104335	0.022197	0.417426	-0.659961	-1.10891	-0.860309	-0.022197	0.12348	0.168945	0.540554	-1.61167
I3LLA0	PWI domain-containing protein OS	-2.20748	0.592605	-1.38878	-0.424146	0.518933	0.567405	0.534189	0.834494	-1.19665	-0.937212	-1.56333	-0.04159	0.967268	0.04159	0.845018	-0.946262
Q28988	Cystatin-A1 OS	-0.704087	-0.148359	-0.360939	-0.433832	0.617844	1.28838	0.383379	0.824117	-0.552077	-1.74473	-0.829617	0.148359	0.603075	1.60644	1.392	-1.49897
A0A287AHC1	Ig-like domain-containing protein OS	0.0839261	0.195928	-1.43836	-1.34525	-0.221357	-0.0760249	-0.0359249	-0.280101	0.349142	0.235783	0.616008	0.00462895	-0.00462895	0.101291	0.264327	-0.986171
A0A287BL70	Uncharacterized protein OS	0.103719	0.719963	1.28919	0.612555	0.317674	-0.486159	0.605641	-0.195087	-0.187061	-0.559383	-0.469028	-0.058864	-0.41179	0.653357	0.058864	-1.8044
F1RNU6	ThiF domain-containing protein OS	-1.31338	0.748368	-1.74676	-0.642691	0.357309	0.893908	0.558023	1.33132	-0.912084	-0.052454	-0.158019	0.052454	0.559173	-0.47806	0.456844	-1.61132
F1RMT5	Uncharacterized protein OS	-1.56145	0.821681	-1.7188	-1.08291	0.0154785	0.311709	0.416748	0.762403	-1.39366	-0.643061	-1.64561	0.278513	0.138993	-0.0154785	0.875959	-0.372414
F1SVB3	Uncharacterized protein OS	-1.58194	0.567437	-0.996979	-0.0933955	0.231646	0.592833	0.596701	0.929021	-0.874122	-1.20007	-1.53887	0.0933955	-0.147363	0.112432	0.355518	-2.53887
A0A287AY31	Uncharacterized protein OS	0.206169	0.36232	-0.026964	0.0210575	-0.032895	0.239765	0.105824	0.531618	-0.52368	-0.490656	-0.579012	0.147066	-0.0210575	-0.228302	0.192254	-2.40164
F1RZA4	Uncharacterized protein OS	-1.77696	0.647201	-1.6895	-0.289124	0.289124	0.689621	0.700793	1.77858	-0.768537	0.291813	-0.676303	-0.329882	0.804235	-0.587141	0.462633	-0.92834
A0A287B626	Ig-like domain-containing protein OS	-0.654494	2.48181	-1.04396	-0.368194	0.484604	0.470153	0.839699	0.409173	-0.682924	-1.37978	-1.59926	0.368194	-0.643984	1.58786	1.72942	-1.09557
A0A287B249	Ig-like domain-containing protein OS	0.677981	1.96519	-0.459523	-0.381229	0.0514385	0.0974255	0.338289	-0.212765	-0.0938735	-0.703817	-0.743796	0.152921	-0.0514385	1.01895	1.23921	-1.27732
A0A287B0N7	CARD domain-containing protein OS	-0.147787	0.703869	-0.116795	0.123468	0.293393	0.52719	0.40887	0.771689	-0.133024	-0.40129	-0.182834	-0.0691773	0.0691773	-0.445193	0.692863	-2.93224
A0A286ZZP5	HIT domain-containing protein OS	-0.66938	0.0870746	-0.30483	0.181587	-0.354157	-0.0084123	-0.190019	0.0111974	0.18035	0.152869	-0.390453	0.0084123	-0.159945	0.0844326	0.176633	-2.68508
A0A287BCM4	Uncharacterized protein OS	-1.15945	0.558946	-0.0574528	0.0156875	-0.00225305	0.217773	0.274754	0.529071	-0.606144	-0.688472	-1.27465	0.00225305	0.490034	-0.37821	0.447711	-1.66924
F1S6P3	5-hydroxyisourate hydrolase OS	-0.362291	-0.100595	-0.17442	0.163276	0.107863	0.583531	-0.197503	0.033557	0.495482	0.404069	0.5109	0.488824	-0.033557	-0.503411	-0.468435	-2.87486
I3LFH1	Ig-like domain-containing protein OS	0.746145	1.61426	-0.450029	-0.46237	0.238451	0.258142	0.470398	0.325734	-0.789261	-0.605586	-0.622106	0.056658	-0.218885	-0.056658	0.996611	-1.20845
A0A287AYR8	Uncharacterized protein OS	0.160333	1.1408	-0.270073	-0.0977725	0.555838	0.413634	-0.0768325	1.27635	-1.03181	0.0768325	-0.358277	-0.318408	1.65367	-1.1937	0.202052	-0.70184
A0A286ZQI6	Uncharacterized protein OS	-1.66375	0.0512975	-1.51129	-0.228478	0.0964265	0.529438	0.268389	0.337745	-3.71004	-2.38811	-2.22652	-0.445336	0.474653	-0.0512975	1.24846	1.43216
A0A287AAB4	SUMO-activating enzyme subunit 2 OS	-0.0413525	0.729783	-0.45044	-0.235701	-0.364026	0.284149	-0.0608588	0.1365	-0.249409	0.14176	-0.0383747	0.0383747	0.524608	0.0510115	0.108563	-1.58517
I3LJA6	Fibrinogen C-terminal domain-containing protein OS	-2.14458	0.02829	-1.49557	-0.732202	-0.245027	0.117989	-0.002461	0.062202	0.149415	0.002461	-0.482618	-0.291494	0.378296	1.30409	1.42832	-1.65011
F1RZA6	RING-type domain-containing protein OS	-0.185827	-0.111825	-0.488895	0.0108475	0.0772085	0.283237	0.305014	0.473136	-0.41806	-0.17072	-0.929138	0.0174575	-0.0108475	0.0322205	0.422983	-2.15577
F1S7X0	Nesprin-1 isoform 4 (Nesprin-1 alpha 2)-like OS	-1.70035	0.0153525	-1.24737	-0.557311	-0.0153525	0.415343	0.122979	0.190162	0.152846	-0.476406	-0.335603	0.410278	0.152846	-0.0179175	0.431177	-2.68845
A0A287B4F9	Uncharacterized protein OS	0.168915	0.449974	0.216648	0.794955	0.557235	0.792094	0.662303	0.842753	-1.26306	-1.22281	-1.59902	-0.243648	-0.396319	-0.92622	-0.168915	-3.23859
K7GSF1	Uncharacterized protein OS	0.124936	0.405458	-0.060689	0.149359	0.069337	0.3909	0.408352	0.663413	-1.15939	-1.11182	-1.43779	-0.067518	-0.105144	-0.75785	0.060689	-3.09025
I3LG75	MLV-related proviral Env polyprotein OS	-1.24434	0.262701	-1.11239	-0.216164	0.328384	0.909699	0.633825	0.88947	0.211768	-0.204258	-0.310869	0.131048	-0.131048	-0.369496	0.145077	-2.7735
P51525	Prophenin-2 OS	-1.20722	0.0348175	-2.08318	-1.44458	-0.774428	0.561987	-0.0750065	0.489434	-0.0348175	0.52751	-0.863127	-0.0348175	0.887841	0.848632	1.40649	0.0442275
P15983	SLA class II histocompatibility antigen, DQ haplotype D beta chain OS	0.240625	1.15064	-0.0960575	0.0960575	1.51758	1.69027	0.689647	0.905002	-1.64338	-1.20836	-2.18564	-0.926365	-0.433427	-1.40428	0.9333	-1.70021
P15982	SLA class II histocompatibility antigen, DQ haplotype C beta chain OS	0.140192	2.13875	-0.213338	0.679558	0.17816	0.308835	1.48729	1.68616	-1.08326	-0.78462	-1.51209	-0.118956	-0.160416	-0.62041	0.118956	-2.98665
P15980	SLA class II histocompatibility antigen, DQ haplotype C alpha chain OS	-1.56012	0.367736	-0.0315345	0.288999	0.701243	0.984923	0.458613	0.611484	-0.300855	-0.711002	-1.42124	0.0315345	-0.360887	-0.180057	0.288999	-2.17813
Q29126	Protein WAP-3 OS	-1.55152	0.64423	-1.89616	-0.494065	-0.003075	-0.990795	-0.00616503	1.44171	-0.251385	2.18929	2.28137	1.63831	1.27249	0.003075	1.20204	-0.823595
A0A287AKL0	Serum amyloid A protein OS	-2.83026	0.697558	-2.28795	-0.588987	0.842988	1.56072	0.902145	0.266237	-0.2107	-0.403019	-1.2976	-0.051195	0.051195	0.440341	1.68229	-2.00897
F1SMF9	ATP synthase subunit d, mitochondrial OS	-1.40408	0.469157	-0.786246	-0.035443	0.440267	0.633341	0.586573	0.495326	-0.646146	-0.890976	-1.00237	0.345781	0.035443	-0.251246	0.427946	-2.64837
A0A287BD08	Uncharacterized protein OS	-0.0093077	0.0093077	-0.420188	-0.658933	0.660543	0.450691	0.382117	0.147372	-0.691132	-0.0456737	-0.424346	-0.171059	0.54302	0.101839	0.297552	-1.73177
A0A287AE99	Small nuclear ribonucleoprotein-associated protein OS	-0.505996	-0.209417	0.0702761	0.580192	0.0305056	0.460031	0.265642	-0.0305056	0.29702	-0.287322	-0.393521	0.306918	-0.490912	0.662484	-0.350099	-2.13718
A0A287ARG2	UBIQUITIN_CONJUGAT_2 domain-containing protein OS	-0.558676	0.28058	-1.72208	-0.405485	0.236061	0.846823	0.252409	1.11463	-0.270899	0.0875552	-0.300403	0.265893	0.0661362	-0.491345	-0.0661362	-1.83268
A0A286ZQJ2	Cytochrome c domain-containing protein OS	-1.62062	0.000380501	-1.46218	-0.650502	-0.366899	0.0983709	-0.0458005	-0.000380501	2.93849	-0.0729865	2.72507	2.054	0.848062	0.247233	0.69706	-2.05433
F6PUJ1	Uncharacterized protein OS	-1.07783	0.450507	-0.33898	0.106343	0.300198	0.409616	0.41521	0.975395	-0.477237	-0.527863	-0.510789	0.35478	0.0223345	-0.571452	-0.0223345	-2.74028
A0A287AEN3	Uncharacterized protein OS	-2.20554	0.009442	-1.29907	-0.677083	-0.164439	0.151143	-0.070876	0.044825	0.635641	0.395327	0.29395	0.052313	0.113101	-0.009442	-0.033517	-2.91378
A0A287ACS9	Guanine nucleotide-binding protein subunit gamma OS	-2.81126	0.754861	-1.9938	-0.759	0.446596	0.801039	0.435426	1.41472	-1.23024	-0.557118	-1.81718	0.193171	0.439159	-0.193171	0.669518	-0.925009
I3LPQ1	Uncharacterized protein OS	0.0118535	-0.0118535	0.324684	0.585011	0.652279	0.940414	0.249758	0.471132	-0.105304	-0.216991	-0.116275	0.0710835	-0.189696	-0.966477	-0.0359565	-2.90177
F1RQ23	Ig-like domain-containing protein OS	-0.321775	2.76916	-0.098615	1.71005	1.71659	2.35159	2.50082	2.77417	-2.07132	-2.16442	-3.03569	-1.45072	-1.11712	-1.77852	2.31239	0.098615
I3LBL3	Uncharacterized protein OS	0.0499595	-0.0499595	0.273117	0.602988	0.488932	0.959588	0.72333	0.547086	-1.04177	-1.06495	-1.5327	-0.151034	-0.50818	-0.797161	0.0880025	-3.06613
A0A287BDN8	Olfactory receptor OS	-1.57674	0.158345	-1.135	-0.076032	0.085462	0.412083	0.223458	0.574842	-0.930369	-0.869769	-1.26198	0.24982	0.190074	-0.673499	0.076032	-3.01131
A0A287BE86	Uncharacterized protein OS	-0.907443	1.11548	-0.817864	0.692176	1.00025	1.31121	0.975399	1.50104	-0.963304	-0.851113	-1.21952	0.0935405	-0.0151405	-0.571384	0.0151405	-2.73199
A0A286ZLN4	Ferritin OS	-2.86446	1.10922	-2.01514	-0.947269	0.354948	0.420025	0.633474	1.53352	-2.56416	-2.63358	-2.96315	0.309434	-0.297494	0.297494	1.24803	-2.30759
F1SF38	DNA helicase MCM9 isoform 2 OS	-2.02064	0.00820495	-0.888186	-0.250214	0.130673	0.247015	0.156668	0.230791	-0.545152	-0.721076	-1.50773	0.0952674	0.148055	-0.00820495	0.0563443	-0.633613
F1RSA0	Phosphorylase b kinase regulatory subunit OS	0.010191	2.07045	1.54507	2.36987	2.28712	1.67495	2.36987	2.62359	-0.885662	-0.928472	-1.32266	-0.041873	-0.262831	-1.19194	-0.010191	-2.94081
A0A287BBY3	Olfactory receptor OS	-1.59764	0.530526	-0.870977	-0.136723	0.426608	0.660218	0.473956	0.818184	-0.892067	-0.498507	-1.0589	0.294824	0.136723	-0.242937	0.565485	-2.23352
A0A287BQQ6	Myosin motor domain-containing protein OS	-1.46463	0.528684	-1.13206	-0.0298435	0.305885	0.645195	0.531048	0.418498	-0.948369	-0.761669	-1.36115	0.417823	0.0298435	-0.284819	0.538761	-2.55027
A0A287BLZ5	Sulfotransferase OS	-0.338214	0.669615	0.14122	0.0075896	0.569026	0.227431	0.0212515	0.274964	-1.32605	-2.30203	-2.45253	-0.605791	0.0508599	-0.614215	-0.0075896	-1.38971
A0A286ZTC9	Uncharacterized protein OS	0.236286	0.158595	-0.500679	-0.73872	0.329832	0.0222735	0.350685	-0.284302	-0.0391275	-0.0222735	-0.570019	0.355852	-0.0979505	0.654122	0.9196	-1.16112
A0A286ZJL9	Uncharacterized protein OS	-0.615059	0.042572	-0.694393	-0.979534	0.548344	0.098831	0.420435	-0.042572	0.045943	-0.110369	-0.972694	0.079225	-0.112246	1.00756	0.895249	-0.47804
A0A287A2V7	Uncharacterized protein OS	-0.199996	-0.0904215	-1.14119	-1.02296	0.666737	0.37458	0.417035	-0.15717	0.155889	0.0432395	-0.576232	0.126478	-0.0432395	0.463513	1.6106	-0.840876
A0A286ZK70	Tankyrase_bdg_C domain-containing protein OS	-1.05367	0.152681	-0.296325	0.0566908	0.114242	0.636051	0.287447	0.589462	-0.312485	-0.676087	-0.655328	0.0747508	-0.0566908	-0.247177	0.110206	-2.97725
A0A286ZN10	Calponin-homology (CH) domain-containing protein OS	-1.80088	-0.044158	-1.23077	-0.699083	-0.003198	0.052628	0.076858	0.086505	-0.123797	0.003198	0.163756	0.548897	0.501591	-0.177494	0.192263	-1.3586
A0A287AQB7	COesterase domain-containing protein OS	-0.292506	-0.21834	0.0040525	0.154843	0.129134	0.142658	-0.0877105	0.41403	0.256722	0.319771	0.083968	-0.0040525	-0.442305	-1.2278	-0.128476	-3.52154
A0A287BAG6	Ig-like domain-containing protein OS	-0.351927	-1.21443	-0.820697	-0.798327	0.13682	0.435344	-0.033727	-1.30613	1.36913	0.891585	0.452766	0.467346	-0.297134	0.033727	0.398472	-2.12821
A0A286ZLR0	Ig-like domain-containing protein OS	1.12928	0.10971	-0.160884	-0.483846	1.45476	1.17339	-0.383966	-0.0591445	-1.47354	-1.53115	0.0767815	0.0591445	-0.710122	0.370744	0.904773	-0.883452
I3L728	Ig-like domain-containing protein OS	-0.446917	0.730211	-0.773727	-0.027014	0.746405	0.642329	0.283535	0.027014	0.32599	-0.191484	0.0835978	0.0790917	-0.636471	-0.15387	-0.561853	-1.41267
A0A287A013	Ig-like domain-containing protein OS	-0.00982749	0.0407305	-0.110212	-0.556708	0.755358	0.00982749	0.241949	-0.193173	0.431682	0.316447	-0.347176	-0.0828915	-0.0177655	0.804577	1.3251	-0.377495
A0A286ZQQ8	Ig-like domain-containing protein OS	1.34516	0.644075	-0.153206	-0.566866	-0.039956	-0.203684	-0.238346	0.082705	0.176144	0.039956	-1.12862	0.139491	-0.666595	1.41023	1.29149	-1.58907
A0A287ALJ6	Ig-like domain-containing protein OS	-0.203036	0.439159	-1.17113	-0.619612	1.4655	1.14538	0.593081	0.336667	-0.589172	-0.395024	-0.384531	0.0480405	0.141756	-0.0480405	1.47273	-1.70515
F1SF13	Cobl domain-containing protein OS	-1.04277	-0.01811	-0.0631249	0.536999	0.01811	0.425676	0.264154	0.30504	-0.284204	-0.923473	-1.29342	0.13542	0.127153	0.7038	-0.0615489	-2.20031
A0A287ALS7	Ig-like domain-containing protein OS	-0.0686075	0.0354005	-1.10804	-1.07215	0.568444	-0.0405935	0.0598675	-0.0354005	-0.455631	0.416315	-0.488367	0.101318	0.0902745	0.60548	1.20368	-1.33589
A0A286ZL57	Uncharacterized protein OS	-0.393944	0.526304	-0.913315	-0.138971	-0.0470698	0.332076	0.380689	0.49494	-0.521001	-0.577035	-0.996845	0.0685342	0.0470698	0.355964	0.933843	-2.14072
A0A286ZYQ7	Ig-like domain-containing protein OS	-1.24981	-0.432193	-1.10142	-0.904043	0.862883	1.18648	2.2622	2.00632	0.596509	0.042965	0.833397	-0.799153	-0.042965	0.513949	-0.717913	-2.42878
A0A287AV26	Ig-like domain-containing protein OS	0.558729	-0.238435	-0.296022	0.050502	-0.491468	1.10755	-0.798523	-0.552543	0.295454	0.345133	0.95408	0.128774	-0.848713	-0.050502	0.201477	-3.08392
A0A286ZJ78	Uncharacterized protein OS	-0.522308	0.00154295	-0.413494	-0.170117	-0.00154295	0.484326	0.299851	0.589585	-0.41144	-0.203485	-0.461554	0.152158	0.93127	0.0183989	0.7283	-1.84646
A0A287A1J6	Ig-like domain-containing protein OS	0.106723	0.577111	-0.760543	-0.827973	0.434778	-0.0515115	0.0515115	-0.390669	-0.740914	-0.677343	-0.560914	0.242749	0.795589	0.450514	1.96303	-0.411207
A0A075B7I6	Ig-like domain-containing protein OS	-0.03311	0.03311	-0.433648	-1.57289	0.978863	1.12804	0.265904	-0.265006	0.292311	-0.244614	-0.944108	0.484738	-0.709438	0.988585	0.887125	-1.84485
A0A287B2X8	Ig-like domain-containing protein OS	0.932573	-0.105395	-0.481216	-0.370739	0.15443	0.346674	0.48085	-0.046962	1.11452	-0.380017	-0.49627	-0.028607	0.113697	0.028607	1.07772	-2.56868
A0A075B7H9	Ig-like domain-containing protein OS	0.857072	0.619651	-1.37282	-1.03892	-0.146134	-0.447343	0.318348	0.0290125	-0.46059	-0.0290125	-0.321153	0.352078	0.245163	0.986691	1.5334	-0.582735
A0A286ZXB0	Uncharacterized protein OS	0.208651	0.456221	-0.798151	-0.337481	0.570467	-0.208651	0.394323	0.236874	-1.27922	-0.643151	-0.450813	0.375103	0.610052	-0.789993	0.503453	-2.87949
A0A287AFK6	Ig-like domain-containing protein OS	-1.47838	0.0166531	-1.55194	-0.876646	0.67267	0.464611	0.139937	-0.300047	0.778839	-0.899057	-0.849112	-0.0166531	0.298521	0.598619	1.05796	-2.04449
A0A287A8V0	Ig-like domain-containing protein OS	0.815557	-0.0356205	-0.438607	-1.26504	1.35824	0.0260985	0.379894	-0.624411	0.0658245	-0.190813	-0.59033	0.183766	0.64006	-0.0260985	1.43195	-0.63306
A0A286ZV86	Ig-like domain-containing protein OS	0.612469	0.344919	-0.148065	-0.850101	0.593561	0.00478649	-0.00478649	-0.715101	-0.702591	-1.03389	-0.454168	0.331288	0.125538	0.0331315	1.86251	-1.47531
A0A287B541	Ig-like domain-containing protein OS	-1.82954	-1.67481	-1.66265	-1.13961	3.39928	2.77849	2.29663	-0.485995	1.96021	1.08098	2.16961	-0.319055	0.319055	-1.69948	0.764469	-3.9136
A0A287ASW4	Ig-like domain-containing protein OS	-0.40929	0.29248	-0.81855	-1.45342	0.953758	-0.58958	-0.29248	-0.773111	3.01292	1.0438	0.388092	0.36287	0.789312	-0.39632	2.69494	-2.04287
A0A286ZVT2	Ig-like domain-containing protein OS	-1.70334	0.125288	-1.50947	-0.681241	-0.0449985	0.253154	0.00434551	0.0546455	-0.679481	1.14	-0.218176	-0.00434551	0.498587	0.41299	1.61277	-1.4795
A0A286ZZ82	Amidohydro-rel domain-containing protein OS	-0.714322	0.749077	-0.451718	-0.15793	-0.0164575	0.0164575	-0.0862915	0.573781	0.0682053	0.219909	-0.22596	0.475749	0.021099	-0.673753	0.223942	-2.67626
I3LRU9	Uncharacterized protein OS	-0.884331	0.410897	-0.545887	-0.0642875	1.05199	0.840277	0.0608075	0.333661	-0.117529	-0.382735	-1.096	0.15661	-0.0608075	0.190592	0.856936	-2.00958
A0A287ARD6	Ig-like domain-containing protein OS	-0.00847	0.326275	-0.813933	-0.573689	0.627336	-0.266968	0.137272	0.212299	-0.630833	-0.042958	-0.06839	0.333762	0.00847	0.896652	1.10788	-1.32945
A0A287AX82	Ig-like domain-containing protein OS	-0.650885	-0.205745	-0.466235	-1.298	2.29975	0.840322	1.7825	-0.622205	1.29299	1.21725	0.075615	-0.075615	1.38488	-0.842705	3.39718	-1.85601
A0A286ZLN6	Ig-like domain-containing protein OS	-1.09582	-0.230657	-1.34208	-0.952266	1.48396	0.827847	0.608377	-0.753606	1.24726	0.640707	0.161661	-0.161661	0.232315	-0.803486	2.12546	-2.61994
A0A287ACY6	Ig-like domain-containing protein OS	-2.00998	0.182874	-1.27027	-0.474029	-0.015447	0.245076	0.058775	0.236137	-0.327393	-0.171965	-0.526702	0.179567	0.023152	0.015447	2.28387	-3.24411
A0A287AA42	Ig-like domain-containing protein OS	0.318491	0.671642	-0.852229	-0.345936	0.126073	0.703731	-0.126073	-0.328358	0.703731	-0.222513	-0.437194	0.795925	-0.486475	0.541111	1.75998	-0.863039
A0A287ACR9	Ig-like domain-containing protein OS	-1.21269	0.833183	-0.537188	-0.086418	0.522084	0.819731	0.594559	0.779262	-0.653358	-0.607518	-0.569598	0.475458	0.086418	-0.192968	0.601211	-2.64298
A0A287AXC8	Ig-like domain-containing protein OS	-1.4171	-0.95873	-0.062698	-0.88388	1.42338	0.058238	0.551778	-0.57825	0.019764	-0.019764	-0.258952	0.302164	0.219702	0.965691	2.2305	-2.08349
A0A286ZWF5	Ig-like domain-containing protein OS	-2.17878	0.587317	-2.19789	-1.10027	0.629934	0.505512	0.289259	-0.178776	0.178776	-0.938859	-0.963179	0.318131	-0.352562	0.328184	2.59254	-1.69878
A0A287ANU5	Ig-like domain-containing protein OS	0.810395	-0.944629	0.935661	-2.9199	-1.43648	-2.10656	0.0119825	-0.279974	0.0027765	0.685919	0.693949	0.00830749	-0.142879	1.0275	-0.0027765	-1.56749
A0A287A7P3	Uncharacterized protein OS	-1.97203	-0.0732955	-1.53457	-0.512169	-0.0242595	0.316318	0.153658	0.21157	-0.61885	0.363305	-0.0240635	0.0240635	0.39586	0.0761255	0.515159	-1.27346
F1SP42	CA domain-containing protein OS	-0.810365	0.369197	-0.581582	-0.251126	0.310983	0.654571	0.346902	0.646906	-0.776479	-0.243985	-0.839673	0.438533	0.243985	-1.06341	0.251585	-2.57485
I3LQ36	RRM domain-containing protein OS	-1.28531	0.819849	-1.74865	-0.0648325	0.659079	0.991383	0.882629	1.29742	-0.694432	-0.59726	-0.365422	0.95415	-1.01783	0.54976	0.0648325	-1.85038
A0A287B3W7	Ig-like domain-containing protein OS	0.643489	0.116622	-0.750449	-0.405146	-0.727074	0.271637	-0.973713	-0.330837	0.374864	-0.0140072	0.0140072	0.0140072	-0.366509	0.0890864	1.05803	-1.83955
A0A286ZNU0	HHH_8 domain-containing protein OS	-0.450545	0.206106	-0.830317	-0.072195	0.305198	0.714003	0.268672	0.830921	-0.65071	-0.362959	-0.442169	0.0838414	0.072195	-0.247177	0.19943	-2.23809
I3LG66	Uncharacterized protein OS	-0.921698	0.182922	-0.349015	-0.286673	0.305488	0.637564	0.694507	0.971268	-0.217503	-0.37389	-0.568328	0.201282	-0.0798281	0.0798281	0.516458	-2.18229
A0A287AVG9	Ig-like domain-containing protein OS	-0.816047	-1.14882	-0.726997	-1.1625	2.58831	1.237	1.12748	-0.893747	2.31123	2.32599	1.34364	-0.536887	0.536887	-1.27683	1.53265	-3.48443
A0A287BCF3	ANK_REP_REGION domain-containing protein OS	-0.504833	0.118205	-0.315292	0.207955	0.204167	0.391269	0.0621046	0.301931	-0.544649	-0.643577	-0.500705	0.0167509	0.220511	-0.328035	-0.0167509	-2.13813
A0A287BQ20	Uncharacterized protein OS	-1.80776	0.119807	-1.67522	-0.56009	0.150751	0.538749	0.366019	0.854425	-1.19497	-0.691136	-0.93735	-0.0297359	0.274154	0.0297359	0.484114	-1.13777
F1S404	Uncharacterized protein OS	-1.39437	0.361358	-0.96057	-0.247283	0.194366	0.514032	0.120961	0.771354	-1.12944	-1.1263	-1.14843	0.387953	0.0366318	-0.0366318	0.486609	-1.533
A0A287BLH9	Ig-like domain-containing protein OS	-1.48773	0.897925	-2.64491	-1.38881	1.0879	0.409824	0.191797	0.996035	-1.50647	-0.631996	-2.73043	-0.087896	0.087896	0.494713	1.16096	-0.884269
A0A287B2F5	Ig-like domain-containing protein OS	-0.004287	0.113338	-0.270335	-0.739822	1.65335	0.267322	1.02656	-0.175288	0.004287	-0.296424	-0.336465	0.886314	-0.275515	0.924086	0.975141	-1.41717
A0A287B7Q3	GST C-terminal domain-containing protein OS	-1.79453	-0.0075375	-1.20804	-0.486612	-0.0386215	0.0075375	0.0178735	0.247281	0.904266	2.15467	1.67971	1.20383	0.118495	-0.677694	-0.0150495	-2.64807
F1SCL3	Heterogeneous nuclear ribonucleoproteins A2/B1 isoform X1 OS	-1.5809	0.389603	-1.02394	-0.058831	0.305774	0.392502	0.366668	0.460238	-0.726409	-0.950819	-1.22875	0.186376	0.058831	-0.550719	0.240099	-3.02747
A0A286ZIG0	Ig-like domain-containing protein OS	-2.56942	-0.442313	0.413393	-0.319102	1.00793	0.240102	0.320154	-0.459792	1.85579	-0.0281415	0.907847	-0.278192	-0.328703	0.0281415	2.70111	-0.520892
A0A286ZT75	PDZ domain-containing protein OS	0.02873	0.15165	-0.555451	0.202475	0.196915	0.482746	0.231316	0.453902	-0.02873	-0.095379	-0.968149	-0.404151	0.636461	-0.151008	-0.194184	-3.01254
I3LND9	Uncharacterized protein OS	0.132635	0.426686	-0.091781	0.314813	0.012473	0.386539	-0.012473	0.419243	-0.155187	-0.068923	-0.361923	-0.019199	0.688482	-0.13131	0.462129	-1.63138
A0A287AQS5	PDZ domain-containing protein OS	-0.237541	0.913919	-0.173788	-0.165497	0.476208	0.731716	0.3314	1.09737	-1.45271	-0.386168	-1.53044	0.165497	1.39023	-0.717766	0.751554	-1.96153
A0A287A1C9	Uncharacterized protein OS	-1.84477	0.0262905	-1.34691	-0.347759	-0.0983445	0.305868	-0.117323	0.103913	-0.0259305	0.0259305	-0.0738655	0.618755	0.62237	0.141267	0.588279	-1.82388
A0A287AGK1	Uncharacterized protein OS	-0.620168	0.164797	-0.346407	0.182736	0.0264604	0.573224	0.24185	0.341034	-0.394703	-0.23413	-0.890398	-0.0264604	0.0863319	-0.11809	0.45443	-1.49424
A0A287BK07	Uncharacterized protein OS	-1.33601	-0.159823	0.483761	0.378188	1.36087	0.02542	1.1851	0.81381	-0.496021	-1.68907	-0.258547	1.23951	-0.409739	-0.02542	1.02742	-0.275678
A0A287B3S0	Ig-like domain-containing protein OS	0.176792	1.30393	-0.53869	0.0518135	-0.257995	0.0022935	0.222722	-0.0371715	-1.58267	-1.5025	-0.381031	1.60772	-1.6822	2.16712	1.26151	-0.0022935
A0A286ZJ38	Ig-like domain-containing protein OS	-1.81398	-1.29013	0.290199	-0.89254	0.084462	-0.341915	-1.0325	0.135272	0.603131	0.782018	-0.003782	-0.89605	0.003782	0.944102	2.04239	-2.46701
A0A287BS79	FH2 domain-containing protein OS	-2.13632	0.740731	-1.51389	-0.611662	-0.0223078	0.333425	0.116922	0.498391	-0.952406	-1.09885	-1.69309	0.033601	0.488167	0.0223078	0.501445	-0.960786
A0A287ATB9	Uncharacterized protein OS	-0.243842	-0.0465	-1.18588	0.565815	0.03405	0.0748561	0.255598	0.444276	-0.0749131	-0.08451	-0.270978	0.164009	0.368928	0.446498	-0.03405	-1.61591
A0A287AX42	Uncharacterized protein OS	-1.77932	0.26162	-1.14973	-0.244659	0.152508	0.446601	0.324646	0.43481	0.00869098	-0.110571	-0.026285	-0.00869098	0.398126	-0.406347	0.577728	-2.33062
A0A287B2Q1	Uncharacterized protein OS	-1.27822	0.367886	-0.00390701	0.239632	0.436564	0.632416	0.193089	0.70411	-1.13791	-0.994099	-1.49634	0.00390701	-0.014253	-0.641799	0.099645	-3.24885
A0A287ABJ9	Uncharacterized protein OS	-0.0673745	0.386748	-0.16535	0.21016	0.0564855	0.286263	-0.0564855	0.52727	0.131406	-0.0894005	-0.641448	0.324249	-0.274667	-0.157572	0.656416	-1.94185
A0A287ABC5	Uncharacterized protein OS	-0.154269	0.0980325	-0.956864	-0.956864	0.0848704	-0.252937	-0.0848704	0.514889	-1.24368	0.352306	0.236727	0.340049	0.570508	-1.18228	0.622038	-2.88892
I3LA78	Uncharacterized protein OS	0.172941	0.417232	0.112541	0.184941	-0.031489	0.252845	0.036314	-0.047991	-0.531887	-0.874949	-1.25936	-0.164959	0.031489	-0.377921	0.084862	-2.66653
A0A287B1Y4	Ig-like domain-containing protein OS	-1.65178	0.233604	-1.03828	-0.233604	0.347118	0.390374	0.317996	0.310878	-0.977627	-0.270408	-1.79978	2.50117	-1.36627	1.04636	1.33248	-1.15652
A0A287B3M5	Uncharacterized protein OS	0.0173043	0.341521	-0.105107	0.493295	-0.117625	0.369821	0.255558	0.193577	0.0315462	-0.330619	-0.218508	-0.00869104	0.00869104	-0.15262	-0.0381347	-3.12708
A0A287A7S8	Ig-like domain-containing protein OS	-1.3316	0.199002	-0.920721	-0.380659	-0.0176625	0.210493	0.0176625	0.369108	0.0848125	-0.84859	-0.558101	1.95463	-0.86678	0.990946	1.07054	-1.92659
A0A287AEB1	Ig-like domain-containing protein OS	0.718895	1.28009	-0.0388015	-0.443749	-0.0772755	0.174341	-0.416364	-0.0540675	-0.0388015	0.258622	-0.141051	0.325034	0.0388015	0.560015	0.958349	-1.34187
A0A286ZIE2	Uncharacterized protein OS	-1.69284	-0.012734	-1.34024	-0.409345	0.019303	0.314825	0.077676	0.34635	-0.875738	-0.370347	-1.21983	0.012734	0.437716	0.061327	1.1744	-2.06337
A0A287A0G8	Endogenous retrovirus group K member 25 Pol OS	0.599864	0.635994	0.159815	0.387397	0.111019	0.78502	0.497539	0.208614	-1.03617	-1.19487	-1.42359	-0.126305	-0.186049	-0.785876	-0.111019	-3.18553
A0A286ZLE5	Uncharacterized protein OS	0.112258	0.505921	-0.185129	-0.112258	0.294077	0.530474	0.33465	0.355114	-0.865288	-0.240045	-0.234638	-0.32559	0.644403	-0.494079	0.253613	-1.46424
A0A287AXZ0	Zinc finger protein 501 OS	-1.77546	0.035953	-1.24856	-0.379662	-0.025071	0.119346	0.025071	0.043942	0.329405	-0.131672	-0.784607	0.539846	-0.080283	0.207457	0.636346	-1.66331
A0A287ATA3	Uncharacterized protein OS	-1.70299	0.094946	-0.890856	-0.452259	0.048024	0.274821	0.138827	0.425453	-0.469196	-0.048024	-0.455599	0.653828	0.73315	-0.507966	0.671285	-2.24681
A0A287AHA0	Uncharacterized protein OS	-0.323086	0.378787	-0.174441	0.150846	0.305932	0.379933	0.27425	0.638188	-0.631563	-0.27903	-0.360855	-0.126485	0.126485	-0.387894	0.138717	-2.08638
A0A287A234	Uncharacterized protein OS	-1.36094	0.315056	-0.934176	-0.094052	0.42193	0.62491	0.575756	0.575825	-0.768436	-0.700366	-0.969686	0.216356	0.094052	-0.241023	0.315588	-2.59583
A0A287ADN5	Bromo domain-containing protein OS	0.134031	0.550855	-0.35885	-0.0086295	0.0086295	0.594113	0.18046	0.547638	-0.855996	-0.21897	-0.652387	-0.16696	0.463659	-0.550059	0.259919	-2.83346
A0A287AVN8	Par3_HAL_N_term domain-containing protein OS	-1.93955	0.0373165	-1.23906	-0.444391	-0.0752915	0.139421	0.189143	0.270941	-0.0528095	0.32675	-0.106358	0.451408	0.815807	-0.0373165	0.301082	-2.24628
A0A287AT77	Ig-like domain-containing protein OS	0.032281	3.92099	-0.284343	0.600318	0.010868	-0.010868	0.244389	-0.0413	-0.462683	-0.552273	-0.706433	0.420211	0.333046	-0.404123	0.780027	-2.57671
A0A287AVJ9	Uncharacterized protein OS	-0.771024	0.214452	-0.204646	-0.452472	0.335719	0.333481	0.091352	0.521217	-1.60083	-1.41623	-1.26272	0.0359867	0.231382	-0.0359867	0.310903	-2.15823
A0A287A0C8	Ig-like domain-containing protein OS	1.108	0.742082	-0.282696	0.23324	-0.511159	0.309066	0.0541495	-0.125703	-0.0541495	-0.273637	-0.0756395	1.1295	-0.825125	0.509979	1.05864	-1.43849
A0A286ZT61	Uncharacterized protein OS	-2.14353	0.123746	-1.14198	-0.480276	-0.057258	0.057258	0.066185	0.186857	-0.652655	0.097985	-1.1103	0.395204	1.2327	-0.452516	0.802607	-1.81615
A0A286ZK67	Uncharacterized protein OS	-1.93777	0.0138195	-1.32307	-0.671749	-0.137918	-0.0138195	0.0545025	0.164263	-0.366215	0.27169	0.341197	0.309639	0.59902	-0.617332	0.194162	-2.2781
A0A287BP16	Uncharacterized protein OS	-1.24628	0.380302	-1.15021	-0.242791	0.48897	0.554381	0.598659	0.521168	-0.861273	-0.589583	-1.01834	0.385893	0.242791	-0.440664	0.346978	-2.78339
A0A287A0W8	Uncharacterized protein OS	-0.499515	0.18889	-0.386686	0.14814	-0.0042938	0.629132	0.346907	0.0042938	-0.392311	-0.41694	-0.682652	0.0671205	0.359233	-0.20084	0.435297	-2.63742
F1SQ77	Ribosomal_L30 domain-containing protein OS	-0.249033	0.012663	-0.368194	0.196284	0.719525	0.516147	0.526734	-0.08067	-0.084245	0.073296	-0.201663	0.436044	-0.012663	-0.265175	0.263934	-3.02464
A0A287AUY0	Uncharacterized protein OS	0.113523	0.852226	0.274537	0.462315	0.765284	0.81423	0.408078	0.563761	-1.00835	-1.04969	-1.58833	-0.152141	-0.343571	-0.74081	-0.113523	-2.92547
A0A287A5H3	Uncharacterized protein OS	-0.17648	0.161259	-0.0642591	0.0104451	0.380589	0.656973	0.149164	-0.0044897	-0.476171	-0.0564571	-0.318558	0.326716	0.0044897	-0.21071	0.161259	-3.1447
F1SNU5	Neurobeachin-like protein 2 isoform X1 OS	-0.310291	0.279858	-0.486943	-0.469431	0.460228	0.478388	0.270625	0.290176	-0.798144	-2.60307	-0.120679	0.120679	-1.37222	0.219958	0.395866	-3.2311
A0A287AT71	PDCD2_C domain-containing protein OS	-0.09596	0.466616	-0.45853	-0.05162	0.30823	0.455598	0.124115	0.529845	-0.49132	0.044651	-0.044651	-0.119566	0.83864	-0.433279	0.252735	-2.13428
A0A287AMH4	Uncharacterized protein OS	-1.67999	0.0532435	-1.04864	-0.621372	0.0688995	0.19975	0.12509	0.209213	-0.910561	-1.11584	-1.24982	0.700939	-0.0532435	0.755015	0.817572	-1.46898
I3L8U7	MTS domain-containing protein OS	-0.0325325	-0.139883	-0.499271	0.0550405	-0.0064365	0.350168	-0.0591095	0.436952	0.0064365	0.526492	-0.0533735	0.0603415	0.318075	-0.430741	0.309197	-3.2233
A0A287AEK4	Uncharacterized protein OS	-1.46964	0.169053	-0.483383	0.0169101	-0.0141169	0.533296	0.0141169	0.360442	-0.412148	-0.622071	-1.43869	0.0527381	0.155175	-0.233898	0.211124	-3.15162
A0A287AHY7	Uncharacterized protein OS	-0.353933	0.240867	-0.553243	0.186634	-0.0810615	0.494533	0.0810615	1.02848	-0.0986765	-0.585167	0.0935255	0.169076	0.503901	-0.553243	-0.0828135	-2.81337
A0A287A3N1	Uncharacterized protein OS	-2.13207	0.022576	-0.997023	-0.324325	-0.044088	0.15906	0.00209901	0.187587	0.408787	-0.133168	0.23522	0.429427	-0.00209901	-0.255218	0.518175	-3.5926
A0A287BM67	Uncharacterized protein OS	-2.17355	0.420759	-1.08816	0.0643359	0.385368	0.846536	0.333078	0.542498	-0.349211	-1.07825	-1.46933	0.185883	-0.0798969	0.0280779	-0.0280779	-2.93417
A0A286ZKT8	Uncharacterized protein OS	-1.81292	-0.00136951	-1.19702	-0.563069	0.00136951	0.132982	0.191794	0.226429	-0.942032	-1.35939	-1.68715	0.54936	0.439964	0.00472951	0.581231	-1.69888
A0A287B706	Uncharacterized protein OS	-1.71487	0.322806	-0.870898	-0.0785825	0.379355	0.443303	0.430248	0.601322	-0.557749	-0.584879	-1.14358	0.166625	0.0785825	-0.204865	0.365277	-2.61514
A0A287A6V5	Uncharacterized protein OS	-2.43181	1.27732	-2.35164	-0.995043	0.130646	0.384346	0.28596	1.77541	-2.02971	-1.77319	-2.18605	-0.130646	0.98676	-0.308432	1.61008	0.727769
A0A287AF59	Heat shock 70 kDa protein 14 isoform X1 OS	-2.03907	0.274032	-0.98723	0.298604	0.142535	0.428334	0.219925	0.201428	-0.96327	-0.95073	-1.43029	0.133616	-0.057671	-0.335951	0.057671	-2.8348
A0A287BKC4	RPOL4c domain-containing protein OS	-1.97883	0.0776125	-1.29039	-0.607816	-0.0167965	0.311592	0.238221	0.0903235	-0.657948	-0.183542	-0.224548	0.0587755	0.791779	0.0167965	0.437841	-1.52799
A0A287A813	Uncharacterized protein OS	-1.87734	-0.039588	-1.15611	-0.339987	0.039588	0.080409	0.081297	0.322935	1.37417	1.32585	1.25732	0.289803	-0.8674	-0.65294	-0.89038	-3.5711
A0A287AZI4	FH2 domain-containing protein OS	-1.50723	0.362388	-0.50193	-0.098836	0.309008	0.35468	0.467669	0.292194	-0.86554	-0.8846	-0.99324	0.267934	0.098836	-0.69002	0.481617	-2.42952
A0A286ZRT6	Reverse transcriptase domain-containing protein OS	-1.93771	0.0261045	-1.04453	-0.470222	-0.0261045	0.403417	0.0829015	0.342435	-0.860302	-1.36339	-1.54894	0.641578	0.346967	0.58856	1.14408	-0.729512
A0A287B5E6	Uncharacterized protein OS	-0.066174	0.066174	0.59422	1.20853	0.169267	0.835893	0.354223	0.219779	-1.00442	-0.91949	-1.6787	-0.17267	-0.41121	-0.75579	0.125468	-2.94754
F1RSW7	Uncharacterized protein OS	-0.219453	0.169216	-0.193557	0.209977	0.205813	0.650768	0.246919	0.661956	-0.225063	-0.09097	0.003206	0.152007	-0.22132	-0.309952	-0.003206	-3.74769
A0A287AB18	Uncharacterized protein OS	-1.54703	0.386556	-0.72884	-0.224765	0.297936	0.718792	0.533664	0.502832	-0.62072	-0.53214	-1.25653	0.224765	0.303718	-0.46651	0.370377	-2.57247
A0A287BCB5	Uncharacterized protein OS	0.443908	0.803979	-0.253165	-0.077315	0.724808	0.978565	0.698679	1.27567	-0.72173	-0.85927	-0.93538	0.01336	-0.01336	-0.476962	0.119786	-3.34149
A0A287AWF8	Uncharacterized protein OS	-1.76848	0.136771	-1.31956	-0.67685	-0.060785	0.060785	-0.165252	0.096145	-1.16134	0.71134	-0.680977	2.87313	0.58698	0.696233	1.53091	-1.65861
A0A287BD85	BMERB domain-containing protein OS	-1.6681	-0.0774255	-0.151527	0.94052	0.571365	1.26676	0.786116	0.864394	0.523291	0.0774255	-0.890497	0.45265	-0.387994	-0.323453	-0.321202	-3.76274
A0A287A333	Alpha-1B-glycoprotein OS	-0.85798	0.531963	-1.08297	-0.87047	0.629441	0.825132	0.555499	0.427419	-0.531088	-0.994869	-1.01206	-0.0703055	0.0703055	0.383384	1.34945	-1.54604
F1SD00	APOBEC1 complementation factor isoform 2 OS	-0.955254	0.275449	-0.583842	0.354346	0.0308685	0.699612	0.414972	0.844189	-0.562643	-0.34192	-0.958324	0.395847	-0.0308685	-0.0422355	0.264947	-2.28487
F1SLX2	Uncharacterized protein OS	0.0168155	0.394816	-0.636212	-0.352419	-0.152278	0.127169	0.267889	-0.0495075	0.28317	-0.0168155	-0.686744	0.305113	-0.0599875	0.844916	0.920601	-1.31011
F1SFR0	WD_REPEATS_REGION domain-containing protein OS	-0.193212	0.128716	-0.215238	0.239477	0.0431645	0.385666	0.0692149	0.22728	-0.0023895	-0.248921	-0.235729	-0.0216685	0.234069	-0.0265295	0.0023895	-2.07437
A0A286ZIR9	Aminotran_1_2 domain-containing protein OS	-0.0171137	-0.171126	-0.334156	-0.0676863	0.428839	0.471322	0.15849	0.58283	0.531246	-0.0490905	0.174402	0.0171137	-0.166108	-0.733643	0.303006	-2.22751
B5KFA0	Aromatic-L-amino-acid decarboxylase OS	-1.2101	0.299018	-0.335295	-0.0865333	0.281032	0.487828	0.33682	0.473192	-0.505467	-0.408461	-0.806916	-0.0683023	0.355356	0.0683023	0.216255	-0.871546
A0A287ANL8	Alpha-and gamma-adaptin-binding protein p34 isoform 1 OS	-1.17436	0.278861	-1.10188	-0.44604	0.394881	0.651681	0.525845	0.567107	-0.79833	-1.21201	-1.56141	0.916811	-0.278861	1.04762	1.06682	-1.6325
F1SPM8	AP2-associated protein kinase 1 OS	-0.893963	0.226585	-0.108546	0.0855726	-0.000683449	0.199464	0.18631	0.320424	-0.791045	-1.1012	-1.08661	0.000683449	0.0384386	-0.220343	0.305018	-2.48913
A0A286ZXA4	Uncharacterized protein OS	-0.610989	0.232095	-0.864299	-0.0676639	0.205959	0.63118	0.239845	0.731698	-0.315791	-0.338692	-0.423872	0.285487	0.0921292	-0.319583	0.0676639	-2.51439
F1S431	AA_TRNA_LIGASE_II_ALA domain-containing protein OS	-0.354887	0.322423	-0.504413	-0.0803996	0.108045	0.287751	0.0571036	0.689076	-0.375323	-0.35286	-0.681388	0.213066	0.783354	-0.0571036	0.440533	-1.69417
F1RQT7	AA_TRNA_LIGASE_II_ALA domain-containing protein OS	-0.16468	0.950798	0.047371	0.322464	0.687319	0.80985	0.668548	1.08426	-0.841114	-0.846964	-1.19115	-0.047371	-0.052049	-0.347261	0.086146	-2.83029
A0A287BF30	Alanyl-tRNA editing protein Aarsd1 OS	-1.24868	1.0212	-1.10744	-0.170467	0.507117	0.625408	0.388891	1.10262	-0.814203	-0.428434	-0.863843	0.170467	1.01091	-0.290506	0.833432	-1.46149
F1SV35	L-aminoadipate-semialdehyde dehydrogenase-phosphopantetheinyl transferase isoform X1 OS	0.0171942	0.12433	-0.0443403	-0.0540453	-0.0835553	0.127195	0.210611	0.451412	-0.253895	-0.100215	0.018738	-0.0171942	0.409659	-0.604532	0.257133	-1.71566
A0A287BAZ8	Uncharacterized protein OS	-0.632225	0.520808	-0.376844	0.0615047	0.343527	0.524921	0.123849	0.632716	-0.511473	-0.425622	-0.648345	-0.0110809	0.027119	-0.8099	0.0110809	-2.54773
F1S1B7	Uncharacterized protein OS	-0.621796	0.154475	-0.289827	0.188826	0.19534	0.492624	0.159813	0.345782	-0.817716	-0.699417	-0.592329	-0.154475	0.31501	-0.317378	0.464858	-3.03836
P80147	4-aminobutyrate aminotransferase, mitochondrial OS	-0.970542	-0.0148431	-0.496376	0.076672	0.0738543	0.293221	0.122388	0.948708	-0.416942	-0.143377	-0.148303	0.0294602	0.351388	-0.407067	0.0148431	-2.06055
A0A287BJ46	Uncharacterized protein OS	-2.31901	0.823569	-0.929598	0.386116	1.20279	1.19213	0.413891	1.95594	-0.988868	-1.01581	-1.337	0.114136	-0.114136	-0.797178	0.230903	-2.9434
F1RG41	Uncharacterized protein OS	-1.94501	0.450196	-1.34397	-0.49331	0.144595	0.893192	0.702241	1.07456	-1.06833	-1.15683	-1.30844	-0.144595	0.325084	0.340086	0.969945	-2.05846
I3LMV8	ATP-binding cassette sub-family B member 8, mitochondrial isoform X1 OS	-0.546339	0.41426	-1.01494	-0.003914	-0.035658	0.445636	0.0784607	1.10345	-0.884941	-1.38431	-1.84783	0.315814	0.003914	0.129445	0.899519	-1.52591
F1RLT0	Uncharacterized protein OS	-0.464089	-0.0584695	0.348339	0.480513	0.349464	0.334771	-0.00429805	1.13072	-0.375928	-0.13192	0.227507	0.00429805	-0.526693	-0.947935	0.0409667	-3.05698
F1S8V9	Uncharacterized protein OS	-0.474584	0.137039	-0.548912	0.0874285	-0.345951	0.22506	0.0052137	-0.0052137	-0.476655	0.563209	-0.390169	0.221231	0.43134	-0.21916	0.76076	-0.622683
A0A287ANH9	ATP-binding cassette sub-family D member 3 OS	-1.92757	0.00624849	-1.20884	-0.570946	0.00410749	0.10606	-0.00410749	0.128436	-0.160525	-0.152361	0.287889	0.210887	0.154429	-0.187376	0.513705	-1.40284
F1RS49	ATP-binding cassette sub-family E member 1 OS	-1.90745	0.0869924	-1.54611	-0.639797	0.0828085	1.04245	0.354429	1.04675	-0.952536	-0.913008	-1.09692	0.0229253	-0.0229253	0.355586	0.174782	-1.0533
K7GL02	ATP-binding cassette sub-family F member 1 OS	-0.583157	0.168633	-0.29735	0.250723	0.0293853	0.355737	0.212214	0.46021	-0.569674	-0.319746	-0.451618	-0.0293853	0.0455377	-0.34824	0.351018	-2.57192
F1SSL4	ATP-binding cassette, sub-family F (GCN20), member 2 OS	-0.767952	0.755496	-0.652273	0.160939	0.056877	0.392926	0.213603	1.11978	-0.542943	-0.290777	-0.416479	-0.056877	0.545046	-0.325038	0.397603	-1.70896
I3LB03	ATP-binding cassette sub-family F member 3 isoform 1 OS	0.072005	0.169616	0.124421	0.607063	-0.11242	0.510298	0.139644	0.512426	-0.35462	-0.12229	-0.471715	0.193684	-0.072005	-0.677033	-0.150628	-2.75423
A0A287AL53	Hydrolase_4 domain-containing protein OS	-0.998445	-0.0147671	-0.548435	-0.0866489	0.324069	0.51184	0.167209	0.50873	-0.790032	-0.777321	-1.4727	0.0147671	0.474066	0.0307569	0.384142	-1.98377
F1RJM8	Protein ABHD11 isoform 1 OS	-1.2062	0.369044	-0.697083	0.0677007	0.323201	0.653664	0.456579	1.17203	-0.850506	-0.379759	-0.429799	-0.0677007	0.278453	-0.331396	0.306742	-1.9323
A0A287BMN4	Monoacylglycerol lipase ABHD12 isoform a OS	-0.107723	0.393785	-0.051047	0.332976	0.556129	0.787398	0.551561	1.10154	-0.989411	-0.645511	-0.856231	0.046991	-0.046991	-0.372111	0.115621	-2.98544
A0A287A5T1	AB hydrolase-1 domain-containing protein OS	-0.668754	0.335475	-0.927838	-0.260792	0.842852	1.13981	0.505244	1.42285	-0.552191	0.0772185	-0.0979765	0.185816	-0.0772185	-0.705928	0.134968	-1.78329
F1SGJ4	Monoacylglycerol lipase ABHD6 OS	0.296603	0.392482	-0.012016	-0.183355	0.012016	0.107309	-0.054644	0.765726	-0.306738	-0.61486	-0.662247	0.295298	-0.024999	0.0953608	0.355393	-2.57613
A0A287BCJ4	Abl interactor 1 isoform b OS	-0.776302	0.16436	-0.651364	0.0512498	0.0869057	0.453529	0.140678	0.36594	-0.570959	-0.315145	-0.776302	-0.0512498	0.131854	-0.706817	0.0592498	-2.64919
A0A287A2E5	Uncharacterized protein OS	-0.151897	0.124736	-0.101949	0.116592	0.116592	0.39878	0.140885	0.231651	-0.220729	-0.260831	-0.367202	0.147561	-0.0354106	-0.640935	0.0354106	-2.92203
A0A287BB27	Tyrosine-protein kinase OS	-1.56936	0.381123	-0.809561	-0.0096926	0.303502	0.784087	0.309531	0.69294	-0.735691	-0.773427	-1.15321	0.0096926	0.0861351	-0.0096926	0.271739	-2.48346
I3LP68	Tyrosine-protein kinase OS	-1.65553	0.436919	-0.854924	-0.045637	0.372487	0.737239	0.514398	0.744403	-0.679296	-0.868521	-1.10234	0.268237	0.045637	-0.102344	0.264504	-2.4291
A0A287AIZ9	Uncharacterized protein OS	-0.772097	0.414806	-0.500102	-0.0623531	0.358033	0.572837	0.243993	0.894978	-0.592318	-0.363817	-0.841139	0.0623531	0.615719	-0.235579	0.316793	-2.10078
A0A286ZZF2	Uncharacterized protein OS	-0.587002	0.38129	-0.597072	-0.0367435	0.444025	0.586544	0.112859	0.594308	-0.559663	-0.385913	-0.651132	0.0367435	0.374864	-0.0749395	0.350179	-1.97306
F1RLA7	Uncharacterized protein OS	-0.482437	0.254965	-0.595914	0.122037	0.192084	0.486679	-0.0085925	0.67262	-0.305979	0.164472	-0.208892	-0.10275	0.698842	-0.491194	0.0085925	-2.42468
F1S6Z3	Costars domain-containing protein OS	-0.103138	0.212679	-2.21487	-1.08242	0.0403343	0.234432	0.0417864	1.20881	-1.28961	0.403227	-0.0403343	-0.503804	0.769433	-1.74539	0.105664	-1.46823
F1SDP0	MPN domain-containing protein OS	-0.433097	0.30036	-0.238506	-0.0151413	0.0349822	0.353246	0.0151413	0.187126	-0.490693	-0.498821	-0.913858	0.0335741	0.288602	-0.283432	0.296843	-1.94962
A0A287B3X6	Activator of basal transcription 1 OS	-0.157392	-0.0777985	0.234333	0.537701	0.304464	0.682876	0.472521	-0.0087725	-0.211771	-0.485559	-0.537861	0.211096	0.0087725	-0.0314165	0.317322	-3.06607
F1RRB7	3-ketoacyl-CoA thiolase, peroxisomal isoform X1 OS	-0.46409	0.263964	-0.938802	-0.395594	-0.0432175	0.150955	0.0432175	1.03745	-0.59879	0.470132	-0.127737	0.0612005	1.01916	-0.667126	0.397355	-1.20965
D0G0B3	3-ketoacyl-CoA thiolase, mitochondrial OS	-0.56505	0.254625	-0.891317	-0.230802	0.113331	0.241952	0.301524	1.08365	-0.582476	-0.0484985	-0.232766	0.0484985	1.03305	-0.182547	0.582989	-1.69171
A0A287AU59	Uncharacterized protein OS	-1.57098	0.458751	-0.808151	-0.333931	0.406161	0.685063	0.599213	0.389434	-0.757221	-0.707711	-0.991902	0.189265	0.199336	-0.189265	0.33125	-2.68165
F1RGB5	Uncharacterized protein OS	-1.81136	0.175065	-1.38619	-0.414872	0.145994	0.194249	0.106027	0.483559	-0.720667	-0.983038	-1.56601	0.751128	0.600594	-0.106027	1.11076	-1.59015
A0A287AFL8	Uncharacterized protein OS	-0.370716	0.425688	-0.223675	0.0566524	-0.0566524	0.160275	0.289966	0.813131	-0.374849	-0.165228	-0.229277	0.0581862	0.514409	-0.0633083	0.361288	-1.65999
F1SNT1	Uncharacterized protein OS	-1.01952	-0.0064695	-0.285186	0.166341	-0.0661765	0.460033	0.573066	0.762311	-0.186176	-0.522436	-0.353803	0.0064695	0.29055	0.675861	0.470577	-1.63598
I3LUR5	Acyl-CoA dehydrogenase family member 9, mitochondrial OS	-0.887475	0.432804	-0.468321	-0.0349047	0.187487	0.532706	0.486803	0.593037	-0.638246	-0.678096	-1.0719	-0.288837	0.215903	0.0349047	0.325465	-2.50579
P79274	Long-chain specific acyl-CoA dehydrogenase, mitochondrial OS	-1.01454	0.129486	-0.491242	-0.126501	-0.0255027	0.100945	0.171266	0.652372	-0.504338	-0.482577	-0.688862	0.0255027	0.619548	0.0285368	0.615518	-1.45689
P41367	Medium-chain specific acyl-CoA dehydrogenase, mitochondrial OS	-1.08488	0.049216	-0.732055	-0.217237	-0.0058886	0.206757	0.103664	0.580059	-0.674531	0.0591412	-0.525115	0.0058886	0.601563	-0.601236	0.422025	-1.72717
A0A287A8Y8	Short-chain specific acyl-CoA dehydrogenase, mitochondrial isoform 1 OS	-1.04861	0.365591	-0.432665	-0.454725	-0.0385765	0.122063	0.355485	0.640952	-0.516029	-0.0121645	-0.602043	0.0121645	0.67792	0.266595	0.640952	-1.7968
A0A287B1V1	Uncharacterized protein OS	-0.43099	0.479269	-0.396996	0.0337666	0.256159	0.234635	0.0656667	0.891343	-0.449317	-0.342694	-0.254112	0.230803	-0.0337666	-0.864354	0.0756705	-2.10139
F1ST43	Very long-chain specific acyl-CoA dehydrogenase, mitochondrial isoform 1 OS	-0.854041	0.0219179	-0.341929	-0.0219179	0.0630148	0.183714	0.233422	0.487427	-0.361217	-0.343846	-0.738564	-0.0608066	0.731832	0.20354	0.378852	-2.2911
A0A287B863	Aggrecan core protein OS	-0.510639	1.25107	-0.671544	-0.0131395	1.09579	1.06263	0.356094	0.645352	-0.967891	-0.907491	-1.36815	0.0131395	0.210768	-0.222041	0.526323	-1.64665
A0A286ZLK5	Uncharacterized protein OS	-0.506974	0.167136	-0.466834	-0.191391	0.0628347	-0.0628347	0.139955	0.134167	-0.890692	-1.11014	-2.20233	0.317721	0.54739	0.515464	0.586065	-2.18053
I3LP02	Uncharacterized protein OS	-0.765896	0.331065	-0.403898	0.068031	0.265896	0.44321	0.334668	0.735242	-0.753095	-0.837057	-0.897753	-0.068031	0.142536	-0.185226	0.357275	-2.04601
A0A287AHQ0	Acetyl-CoA acetyltransferase, cytosolic OS	-2.09063	-0.0126905	-1.51051	-0.386898	0.0126905	0.159992	0.0511995	0.395656	-0.712806	-0.430542	-0.354658	0.495986	0.591902	0.101517	0.792567	-1.28712
I3LPF1	ACB domain-containing protein OS	-1.44516	0.358283	-1.0419	-0.0315864	0.0315864	0.842749	0.408909	0.635621	-1.26873	-0.92551	-1.91735	0.0455661	0.362756	-0.186365	0.536151	-2.45693
I3LKN7	GOLD domain-containing protein OS	-1.24005	0.377585	0.152797	0.93761	-0.152797	0.806018	0.387123	0.681699	-1.35859	-0.496486	-2.1931	-0.238209	0.707625	-0.797733	0.469123	-2.60105
A0A287ARC2	ACB domain-containing protein OS	-0.296277	-0.035363	-0.250407	-0.035363	0.035363	0.188544	0.266626	0.483271	-0.248357	0.14708	-0.100458	0.215539	0.625367	-0.100458	0.571822	-2.16863
A0A286ZLW3	ACB domain-containing protein OS	-0.523451	0.450675	-0.279873	0.169594	0.00620525	0.448403	0.669333	0.798923	-0.606045	-0.464468	-1.19219	-0.00620525	0.0681849	-0.213615	0.234324	-2.79499
F1S683	Acyl-CoA-binding domain-containing protein 6 OS	-1.60698	-0.042752	-1.36351	-0.394649	-0.156964	0.187579	0.159202	0.35717	-0.51504	0.085982	0.114099	0.042752	1.09923	-0.704615	0.503679	-1.13405
A0A286ZJN9	ACB domain-containing protein OS	-0.800688	0.049568	-0.049568	0.091227	2.10688	2.509	0.582897	1.117	-0.655808	-0.553828	-0.182248	0.545423	-0.399688	-0.984648	2.27899	-1.61952
I3LST0	Uncharacterized protein OS	-0.0137259	0.315267	-0.463567	-0.209674	0.0137259	0.613218	0.168295	0.516315	-0.489026	-0.572748	-1.49332	0.257752	0.389329	-0.57957	0.0451064	-2.60951
F1RRW5	Angiotensin-converting enzyme OS	-0.783544	0.195341	-0.450316	-0.146114	0.510999	0.773195	-0.00573073	0.0767314	0.102314	-0.749424	-1.12097	0.00573073	0.104981	0.184035	-0.0406717	-2.25474
K7GLM4	Angiotensin-converting enzyme OS	-0.00344151	0.800215	-0.611863	-0.17143	0.564762	0.673337	0.421901	0.746906	-0.361586	-0.614493	-0.532616	-0.0017195	0.469868	0.0017195	0.269042	-1.91162
A0A287B6W8	SAP domain-containing protein OS	-0.827534	0.516754	-0.375867	-0.0371593	0.353039	0.464968	0.418223	0.885324	-1.29006	-1.43325	-1.24165	0.0371593	0.3615	-0.132388	0.596749	-2.63489
F1S0N2	ATP-citrate synthase OS	-0.028065	0.288128	-0.299541	-0.11658	-0.077729	0.246984	0.150625	0.336001	-0.601291	-0.654872	-0.894702	0.028065	0.334692	0.352905	0.753325	-1.8947
F1S0C2	2-amino-3-carboxymuconate-6-semialdehyde decarboxylase OS	-0.267926	0.564448	-0.269767	-0.0045849	-0.121085	0.0889077	-0.292048	0.459439	0.150787	0.483687	0.146651	0.260747	-0.0107306	-0.597234	0.0045849	-2.29018
A0A287BQT2	Uncharacterized protein OS	-0.510965	0.333705	-0.494947	0.0990894	0.404949	0.733932	0.213523	0.845072	-0.0500695	0.0104955	-0.339762	-0.0104955	-0.0433975	-0.339762	0.369142	-2.45456
F1SRC5	Aconitate hydratase, mitochondrial OS	-0.541569	0.189869	-0.758668	0.0755633	0.087959	0.420816	-0.0306073	0.641497	-0.550081	-0.518418	-0.61557	-0.166325	0.109736	0.245027	0.0306073	-2.11807
P16276	Aconitate hydratase, mitochondrial OS	-0.756629	0.2333	-0.669019	0.131235	0.0773611	0.393365	-0.0081677	0.78848	-0.489419	-0.493595	-0.67612	-0.136145	0.418027	0.0081677	0.110752	-2.11669
A0A287B1V5	Uncharacterized protein OS	-0.143767	0.495319	0.106844	-0.0307897	0.27011	0.447881	0.312428	0.533532	-1.13299	-0.946105	-1.30906	-0.32125	0.390312	-0.0307897	0.0307897	-1.6129
F1RUE0	4HBT domain-containing protein OS	-1.00674	-0.0143293	-0.151681	0.10267	0.317618	0.67115	0.0584519	0.306684	-0.28133	-0.22207	-0.729123	0.0143293	0.243108	0.135997	-0.0560597	-1.88475
A0A287BCT2	Uncharacterized protein OS	-1.17961	0.255126	-0.507545	0.134179	0.198051	0.380544	0.039089	0.938138	-0.446337	-0.039089	-0.3149	-0.059314	0.970918	-0.482294	0.260576	-1.68211
A0A286ZVQ0	BAAT_C domain-containing protein OS	-1.29732	0.260895	-0.528888	0.0223391	0.260895	0.538429	0.280054	1.06715	-0.925518	-0.88512	-0.949118	0.0933785	-0.127811	-0.0223391	0.38052	-2.13625
A0A287BDI3	Uncharacterized protein OS	-0.612321	0.036161	0.535199	0.850935	0.569257	0.79645	0.101824	0.786501	-0.32881	-0.320184	-0.153847	-0.23462	0.473282	-0.097485	-0.036161	-2.52053
F1S3J0	Uncharacterized protein OS	-0.35945	0.868428	-2.99001	-2.54874	-3.38315	-3.08577	0.891961	1.50037	0.35945	0.409225	0.543303	0.660713	-2.18077	-1.7752	0.735662	-2.12157
I3LA89	Acyl-coenzyme A thioesterase 8 OS	-0.268768	0.0492015	-0.0905225	0.112781	0.185263	0.362862	0.0634005	0.701279	-0.0852925	-0.0492015	-0.227851	-0.0975265	-0.171341	0.250146	0.587986	-1.6056
K7GPJ4	Uncharacterized protein OS	0.0333408	0.500466	-0.316513	-0.0428948	0.0927192	0.208644	0.101419	0.59385	-0.800781	-0.484267	-0.162773	-0.0333408	0.527616	-0.623073	0.601025	-1.59469
F1RVZ1	Acyl-coenzyme A oxidase OS	-0.56035	0.0948219	-0.425947	0.0223391	-0.0239051	0.232326	0.249276	0.560535	-0.286	-0.324068	-0.367137	-0.0223391	0.320097	0.165211	0.395824	-1.78882
F1SGH9	Acyl-coenzyme A oxidase OS	-1.28406	0.0950339	-1.20056	-0.505822	-0.786397	-0.218298	0.0453314	-0.140107	0.412357	0.0601284	0.0762317	0.202976	0.220206	-0.0046044	0.0046044	-1.98777
F1S7X9	Acyl-coenzyme A oxidase OS	0	0.079398	0	0.432279	-0.148154	0.611249	0.441324	0.832496	-1.10909	-1.0067	-1.05014	0.00978297	-0.128792	-0.466015	0.304075	-2.87641
F1S9H9	Low molecular weight phosphotyrosine protein phosphatase OS	-0.292217	0.0994955	-0.967024	-0.378206	0.0387564	0.306591	-0.0051869	0.677525	-0.413301	0.17757	0.0227989	0.0051869	0.393772	-1.04744	-0.129367	-2.29767
P81693	Low molecular weight phosphotyrosine protein phosphatase OS	-0.583258	0.452811	-0.206777	-0.0318243	0.290657	0.217996	0.235357	0.395277	-0.764643	-0.551153	-0.413108	0.0940523	0.0723193	-0.764643	0.0318243	-2.35652
F1SIC2	Uncharacterized protein OS	-0.263657	0.282084	-0.318105	-0.146905	0.093581	0.484322	0.449904	0.570558	-0.423255	-0.638121	-0.696616	0.163765	0.0468026	-0.0468026	0.248888	-2.42531
P09889	Tartrate-resistant acid phosphatase type 5 OS	0.610394	0.448863	-0.619355	0.0757	0.00653	0.403246	0.248749	0.515384	-1.03809	-1.13751	-1.30593	-0.00653	-0.313607	-0.810165	0.07271	-3.29583
F1SDC2	Uncharacterized protein OS	-0.463765	0.263345	0.0719351	0.316739	0.112303	0.385368	0.138151	0.608085	-0.765373	-0.623748	-0.658458	0.0761639	-0.18041	-0.522232	-0.0719351	-2.35539
A0A287B7S7	Acyl-CoA synthetase family member 2, mitochondrial isoform 2 OS	-0.0748013	0.21875	-0.502458	-0.253318	0.0962657	0.371172	0.0748013	0.498693	-0.463802	-0.322835	-0.357849	0.0794276	0.733043	-0.417438	0.14857	-1.57816
A0A287A933	Uncharacterized protein OS	-1.41038	0.197424	-0.853832	0.0166001	0.28888	0.667119	0.334241	0.972407	-0.636292	-0.581263	-0.57265	0.106495	-0.0166001	-0.447298	0.0848812	-2.00496
A0A287AIP7	Long-chain-fatty-acid--CoA ligase 1 isoform X2 OS	-0.563897	0.0644455	-0.154816	-0.0437855	0.0437855	0.176237	0.442694	0.877649	-0.593259	-0.432653	-0.522228	-0.0698145	0.912252	0.346161	0.925488	-0.942409
F1SR72	AMP-binding domain-containing protein OS	0.0628957	0.119148	-0.813487	-0.401744	0.0856604	0.336408	0.0912961	0.401364	-0.980785	-0.415664	-0.614603	0.381952	-0.0628957	-0.309748	0.383102	-2.17005
A0A287BK93	Long-chain-fatty-acid--CoA ligase 4 isoform X1 OS	0.0588575	0.0682385	-1.53284	-0.739451	-0.278957	-0.0399101	-0.223942	0.048061	-0.78699	0.0960215	0.0399101	0.364288	0.13353	-0.479147	0.255865	-3.10168
F1S5J8	AMP-binding domain-containing protein OS	0.469481	0.500688	-0.111241	-0.111241	-0.0950005	-0.0613035	-0.201088	0.486369	0.0629125	0.16534	-0.18381	0.479155	0.0613035	-0.563658	0.734738	-1.95815
A0A287A7U8	Uncharacterized protein OS	-0.328122	0.353595	-0.206244	0.386997	0.0858735	0.361371	-0.0640455	0.417159	-0.319806	-0.166561	-0.43857	0.0365315	0.66561	-0.0365315	0.538746	-1.42736
F1RPB0	Uncharacterized protein OS	-0.168071	0.53956	0.053008	0.173932	0.006543	0.076467	-0.006543	0.472768	-0.577606	-0.381608	-0.40741	-0.038106	0.684004	-0.128195	0.578419	-1.6502
F1RPB1	Uncharacterized protein OS	-0.656196	-0.0810815	-0.0490995	0.37295	0.119849	0.389901	0.625013	1.00944	-0.304072	0.0195315	-0.525766	-0.0195315	0.685404	-0.111952	0.0278855	-1.23049
I3LSY0	Acyl-coenzyme A synthetase ACSM4, mitochondrial OS	-0.248122	0.535808	-0.144228	0.373683	0.187885	0.545589	0.613423	1.16744	-0.444696	-0.130535	-0.42546	-0.160039	0.109275	-0.109275	0.863613	-1.44955
I3L882	Acyl-coenzyme A synthetase ACSM5, mitochondrial isoform 1 OS	0.12291	-0.00459048	-0.855605	0.509122	0.648267	1.11995	0.818344	1.22454	-0.801665	-0.867715	-1.25751	0.00459048	-0.0545235	-0.583295	0.143891	-3.10614
A0A287BA23	Acetyl-coenzyme A synthetase OS	-0.53991	-0.315087	-0.42987	-0.133413	0.308898	0.488993	0.373615	0.759954	0.040992	-0.040992	-0.202976	0.363245	0.438026	-0.060055	0.436791	-1.7074
A0A287BEZ5	Acetyl-coenzyme A synthetase, cytoplasmic isoform X1 OS	0.353058	0.150266	-0.115734	-0.255911	-0.0857685	0.225303	0.0632665	0.332318	-0.238353	-0.0632665	-0.21527	0.0820235	0.402398	-0.185054	0.439234	-2.28566
A0A286ZJB9	Acyl-CoA synthetase short-chain family member 3, mitochondrial isoform 1 OS	-0.213484	0.501859	-0.272294	-0.0325605	0.186573	0.547134	0.374126	0.811145	-0.780675	-0.166562	-0.64853	-0.180091	0.695261	0.0325605	0.634735	-1.60878
C7AI81	Actin alpha 2 OS	-0.0153915	0.319254	-0.238056	-0.0858625	0.0765916	0.425611	0.299643	0.576649	-0.386878	-0.306536	-0.296552	0.0153915	0.357693	-0.196618	0.401282	-1.86766
Q6QAQ1	Actin, cytoplasmic 1 OS	-2.0993	-0.00745699	-1.45716	-0.586176	0.00745699	0.199549	0.044085	0.229934	-0.930134	0.083511	0.493021	-0.204865	1.46919	-0.846904	0.545717	-2.06284
I3LVD5	Actin, cytoplasmic 2 OS	-0.74651	0.530421	-0.506376	-0.172952	0.204385	0.510358	0.374636	0.756659	-0.503973	-0.259461	-0.547842	0.076983	0.390219	-0.076983	0.528075	-1.33859
F1SGC8	Actin-like protein 6A isoform X1 OS	-1.49576	0.836714	-1.37585	-0.285782	0.344204	0.798988	0.506647	1.12874	-1.08795	-1.26105	-1.20887	0.139612	0.40213	-0.139612	0.76828	-1.93016
I3LLY3	Uncharacterized protein OS	0.054567	1.00015	-0.567313	-0.288279	0.15918	0.353597	0.334176	0.720295	-0.923564	-0.51103	-0.893814	-0.054567	1.14492	-0.158812	1.05711	-1.10102
F1RHL9	Alpha-actinin-2 isoform 1 OS	0.200632	0.601716	-0.436644	-0.505199	-0.314537	0.133848	0.182467	0.325584	-0.516567	-0.375333	-0.7705	-0.133848	1.02436	0.42995	0.863524	-1.04227
A0A287A4Q7	Alpha-actinin-4 isoform 1 OS	-0.292908	0.977574	-0.51875	-0.203825	0.494621	0.596107	0.44727	0.839785	-0.767354	-0.455671	-0.633335	0.130148	1.0689	-0.130148	0.915303	-1.02528
I3LHK5	Actin-related protein 10 OS	-1.53981	0.116964	-1.02609	-0.406915	-0.0539645	0.324852	0.0635365	0.324828	-0.435265	0.0311015	-0.0311015	0.183288	0.966971	-0.228984	0.484819	-1.08407
F2Z5G5	Uncharacterized protein OS	-0.975773	0.239239	-0.528887	0.0734701	0.102229	0.385683	0.133083	0.749119	-0.637904	-0.528887	-0.588919	-0.0734701	0.258835	-0.289495	0.284157	-2.21834
F1STD5	Uncharacterized protein OS	-0.0334878	0.0778819	-0.241228	0.179954	0.381931	0.339035	0.0334878	0.521198	-0.449033	-0.330121	-0.304159	-0.0426576	0.0778819	-0.428855	0.126415	-2.87631
B5APU3	Actin-related protein 2 OS	-0.900544	0.348262	-0.525036	-0.0828815	0.0826473	0.357607	0.213217	0.711093	-0.488993	-0.457922	-0.693352	-0.0074597	0.0295535	0.0074597	0.468509	-1.94007
F2Z5D2	Actin-related protein 3 isoform 1 OS	-0.984443	0.38586	-0.987773	-0.038638	0.041905	0.314699	0.051664	0.944001	-0.583606	0.038638	-0.408375	-0.093152	1.06216	-0.082439	0.512569	-0.084219
F1SDX1	Actin-related protein 5 OS	-1.74436	0.109278	-1.09876	-0.442032	0.006392	0.247581	-0.006392	0.325614	-0.196281	-0.292124	-0.292124	0.481252	0.80264	0.077853	0.987712	-1.73665
F1SH80	Actin-related protein 8 OS	-0.154601	0.326491	-0.0105445	0.195485	0.887884	1.06346	0.466421	0.394971	-0.998023	-0.605113	-1.21755	0.0105445	-0.18749	-0.492282	0.245826	-2.89114
P37111	Aminoacylase-1 OS	-1.09978	0.146905	-0.495889	0.19841	0.280796	0.741284	0.269125	1.0188	-0.348762	-0.248428	-0.591952	-0.0583478	0.0502008	-0.0502008	0.142647	-1.59669
J9JIK5	Acylphosphatase OS	0.0490813	0.250094	-0.4533	0.0347259	0.15773	0.365858	0.261234	0.480453	-0.085568	-0.228886	-0.0438377	0.256294	-0.0347259	-0.543041	-0.0684211	-2.53874
I3LC10	Acylphosphatase OS	-0.701712	0.0657132	-1.01049	-0.169785	0.11871	0.346852	0.214338	0.592381	-0.234782	-0.601871	-0.647605	0.0494267	-0.0494267	0.0670622	0.0858163	-2.35971
I3LDF4	A_deaminase domain-containing protein OS	-1.92046	0.740502	-1.0774	-0.402414	0.166999	0.378504	0.442634	0.988956	-1.13497	-0.725447	-1.45873	-0.082697	1.10463	0.082697	0.876003	-0.998469
F1SI59	Adenosine deaminase-like protein isoform X1 OS	0.594395	1.02732	-0.446873	0.527132	0.827034	0.726864	0.492846	1.27129	-1.1492	-0.182765	-0.0063	-0.126663	0.0063	-1.17031	-0.267438	-4.25423
O77633	Disintegrin and metalloproteinase domain-containing protein 10 OS	-0.874437	0.141773	-0.449247	0.00963295	-0.00963295	0.658896	0.353765	0.363014	-0.938321	-0.901866	-1.28676	-0.100457	0.218927	0.457778	0.54467	-1.5433
A0A287BGA9	Disintegrin and metalloproteinase domain-containing protein 15 isoform 6 preproprotein OS	-0.153715	0.376404	-0.0240386	-0.0162106	0.529714	0.646754	-0.0915266	0.143267	0.0949362	0.0162106	-0.746427	-0.0800576	-0.131558	0.0374271	0.188678	-2.13325
F1SA97	Disintegrin and metalloproteinase domain-containing protein 17 OS	-2.09415	0.0326205	-1.35823	-0.755936	-0.0326205	0.0392025	0.0522475	0.257333	-0.365297	-0.159148	-0.446696	0.113329	0.895662	0.0970095	0.720302	-1.3927
F1RZL4	Disintegrin and metalloproteinase domain-containing protein 9 OS	-1.82718	0.771185	-1.12177	-0.291491	0.396757	0.68511	0.521423	0.989381	-1.52694	-1.3697	-1.45864	0.0106194	0.0954222	-0.0106194	0.508684	-1.77952
F1RM86	Uncharacterized protein OS	-1.89543	0.788811	-1.55565	-0.217723	0.404794	0.524845	-0.178954	0.178954	-0.653492	-0.562758	-0.959686	0.635669	0.511362	0.678525	0.738584	-1.77489
F1SHP1	Peptidase M12B domain-containing protein OS	-0.447613	0.343159	-1.24777	-0.155673	0.616876	0.995994	0.398092	0.281085	-0.701608	-0.744006	-0.94754	-0.0898602	0.165918	0.0898602	0.464215	-2.01008
F1S6D2	A disintegrin and metalloproteinase with thrombospondin motifs 15 preproprotein OS	-2.06312	0.00616901	-1.1375	-0.784357	-0.00616901	0.111064	0.077606	0.327294	-0.790787	-1.27377	-1.41771	0.365802	0.201534	0.130529	0.866847	-0.757477
I3LAK9	A disintegrin and metalloproteinase with thrombospondin motifs 2 isoform 1 preproprotein OS	0.049933	0.561094	0.154761	0.58593	0.943892	1.09703	0.187584	0.764658	-1.34023	-1.2615	-1.50393	-0.237255	-0.189007	-1.13622	-0.049933	-3.13141
F1S1A7	Peptidase M12B domain-containing protein OS	-0.23905	-0.111263	0.313656	0.182294	0.25717	0.604728	-0.104668	-0.0513787	0.25589	0.0643428	-0.385246	-0.00611965	0.00611965	-0.13795	0.157818	-2.45484
A0A287B8M3	Peptidase M12B domain-containing protein OS	-1.80844	0.114026	-1.11102	-0.382378	0.0538565	0.157677	0.00980051	0.217998	0.154559	-0.18692	-0.238069	-0.137521	-0.00980051	0.122813	0.473509	-2.16407
A0A287A826	ADAMTS-like protein 4 isoform 1 OS	-0.251623	0.296055	-0.776317	-0.0243259	0.297293	0.50011	0.0243259	0.457562	-0.196572	-0.0682849	-0.680606	0.218465	-0.0682849	0.0406782	0.345955	-2.32781
F1RGM8	Uncharacterized protein OS	-0.577692	0.440512	-0.577692	-0.0743842	0.163389	0.521843	0.325224	0.664196	-0.413376	-0.303253	-0.988156	0.0743842	0.289263	-0.157511	0.531429	-2.13544
F1S456	A to I editase domain-containing protein OS	-0.59329	0.215642	-0.55406	-0.0373384	0.0373384	0.636971	0.140579	0.478887	-0.645021	-0.298571	-1.08314	0.0487094	0.487268	-0.197715	0.105619	-2.39733
A0A287ATE6	CMP/dCMP-type deaminase domain-containing protein OS	-0.00719449	0.734451	-0.521462	0.351344	0.812588	0.940732	0.691768	1.26133	-0.895072	-0.756222	-1.57886	0.00719449	-0.131882	-0.592432	0.0861985	-3.14105
A0A287BPU6	Uncharacterized protein OS	-1.38799	0.778869	-1.41583	-0.281731	0.510915	0.879632	0.698933	1.45245	-1.07899	-0.482938	-1.32506	0.281731	0.523183	-0.385694	0.703252	-1.55333
I3L9P4	Adenylate cyclase OS	0.258048	0.323274	0.4311	0.032191	0.94462	0.677157	0.53265	0.372041	-1.05466	-1.28614	-1.56366	-0.170928	-0.323792	-0.784074	-0.032191	-3.29553
A0A287AQR6	Adenylate cyclase OS	-1.85356	0.147328	-1.09865	-0.616194	0.035206	0.195474	0.332618	0.307796	-0.625074	-1.33476	-1.10344	0.868545	-0.035206	0.310054	0.813008	-1.46601
A0A287AI37	Aldolase_II domain-containing protein OS	-1.53937	0.404283	-0.921306	-0.323311	0.112337	0.473628	0.421934	0.534074	-0.991041	-1.05855	-1.56778	0.000691351	0.0981985	-0.000691351	0.471635	-2.16923
A0A286ZR45	Aldolase_II domain-containing protein OS	-1.53249	0.125224	-0.0343906	0.296025	0.0343906	0.391976	0.327201	0.230355	-0.252631	-0.633364	-1.67165	-0.128381	0.214386	-0.36257	0.188211	-2.93104
I3L5B0	Beta-adducin OS	-1.6795	0.063583	-1.17792	-0.552023	0.042192	0.308235	0.18235	0.262425	-0.042192	-0.250778	-0.342972	-0.056131	0.893993	0.98237	1.08935	-1.6371
A0A287BQQ3	Aldolase_II domain-containing protein OS	-1.81977	0.41104	-0.272951	-0.00436297	0.0373321	0.317274	0.274629	0.71912	-0.630009	-0.791798	-1.56188	0.00436297	0.530634	-0.0457971	0.558551	-2.32484
F1S5M9	Aldolase_II domain-containing protein OS	-0.295318	0.274286	-0.100155	0.215032	0.0313679	0.434296	0.282907	0.461672	-0.710967	-0.728186	-1.26808	-0.0313679	0.230394	-0.255542	0.459501	-2.28618
F1S747	Ras-related protein Rab-32 OS	-1.8587	0.783659	-0.927594	-0.039647	0.683268	1.22656	0.783659	0.809761	-1.006	-1.01053	-1.232	0.039647	0.096862	-0.666614	0.105867	-2.85927
F1RX85	Uncharacterized protein OS	-2.24159	-0.174554	-1.14584	-0.37825	-0.428162	0.228932	-0.0285665	0.137464	0.289914	0.0285665	-0.20709	0.271518	0.520719	0.13259	0.319145	-1.50833
A0A287A168	Uncharacterized protein OS	-1.5165	0.186088	-0.991326	-0.607287	-0.047999	0.3178	0.047999	0.079373	-0.678616	-0.892626	-1.59221	0.219937	0.566495	1.5077	1.56712	-1.04501
K7GMF6	Uncharacterized protein OS	-0.143562	0.147164	-0.151975	0.0740293	-0.0152379	0.264328	0.18506	0.452541	-0.463395	-0.527621	-0.476013	-0.00911185	0.229778	0.00911185	0.482197	-2.80429
F1RQ16	Adhesion G-protein coupled receptor F1 isoform 1 OS	-0.121551	0.668743	-0.584134	-0.04791	0.208271	0.257514	-0.00248	0.655157	-0.901735	-0.449337	0.00248	0.142383	0.650951	-0.21634	0.425748	-1.80901
I3LB22	Uncharacterized protein OS	-2.08967	0.00548449	-1.38631	-0.637532	-0.135513	0.139442	-0.00548449	0.41894	0.16298	0.0206865	0.236024	0.466619	-0.294659	-0.767009	0.150171	-3.10421
F1RQ17	Uncharacterized protein OS	-0.4886	0.309462	-0.347445	0.11986	-0.322451	-0.11986	0.747414	1.07458	-0.719249	-0.89644	-0.86002	0.673413	0.653955	0.36864	1.98342	-3.12706
A0A286ZU80	Uncharacterized protein OS	-0.179556	0.458399	-1.06363	0.020797	-0.020797	0.041153	0.209111	0.089599	-0.475949	-0.767466	-0.501484	0.08593	0.239157	-0.434956	0.219196	-2.92637
F1RF37	Uncharacterized protein OS	-0.883573	0.0200255	-1.01616	-0.930063	-0.814863	0.482702	0.409922	-0.0200255	0.156331	0.203471	-1.00463	0.0789935	-0.378183	1.79834	1.45723	-1.43893
A0A286ZZF3	Adhesion G protein-coupled receptor L1 isoform 2 OS	0.0644683	0.518472	0.388335	0.433031	0.455399	0.730712	0.178985	0.402657	-0.243324	-0.37997	-0.711359	-0.311828	-0.0644683	-0.628369	-0.139107	-3.34457
A0A287AE93	Uncharacterized protein OS	-0.58616	0.164042	-0.151314	0.263314	0.137448	0.252202	0.213259	0.145477	-0.314288	-0.357134	-0.793122	0.125318	-0.125318	-0.151314	0.344614	-2.63805
A0A286ZWR2	Uncharacterized protein OS	-0.0714944	-0.053892	0.027224	-0.027224	0.269112	0.323998	0.052446	0.144461	-0.567312	-0.66055	-0.867316	0.099187	0.056192	-0.249617	0.076006	-2.61219
A0A287AGR4	Adhesion G protein-coupled receptor L4 OS	-1.1282	0.0951427	-0.470682	-0.0774604	0.235109	0.486441	0.259508	0.425324	0.0144421	-0.253429	-0.584928	-0.0299994	0.350786	-0.0099077	0.0099077	-0.872404
F1S0C1	S-(hydroxymethyl)glutathione dehydrogenase OS	-0.976525	0.628596	-0.224256	0.0105905	-0.0304215	0.101474	0.204044	0.754655	-0.284499	-0.0950815	-0.57599	0.0999545	0.333811	-0.0105905	0.271736	-0.762403
F1RTZ1	Fe-ADH domain-containing protein OS	-0.13869	0.312715	-0.688524	-0.0920403	0.391043	0.545507	0.155888	0.444013	-0.424251	-0.0484414	-0.229543	0.0851531	0.381629	-0.567338	0.0484414	-2.38959
I3LEI8	1,2-dihydroxy-3-keto-5-methylthiopentene dioxygenase OS	-0.647727	0.705582	-1.05523	-0.818596	0.556204	0.570343	0.0997751	1.31142	-1.16266	0.0771027	-0.150122	-0.0771027	0.665615	-0.967764	0.367301	-1.59095
A0A287AHI7	C1q domain-containing protein OS	-1.65152	-0.016166	-1.42609	-0.429786	-0.078837	0.016166	0.033973	0.221302	0.069158	-0.324368	-0.469973	0.372338	0.161059	1.00722	1.2033	-1.73557
A0A287BI19	BTB domain-containing protein OS	-0.109645	-0.0881653	0.124243	0.055141	0.085703	0.0120341	0.196034	-0.0120341	-0.505574	-0.853842	-0.980032	0.114395	0.300696	-0.16254	0.283222	-2.28101
A0A287ACN2	Uncharacterized protein OS	-0.286567	0.499152	-0.679006	-0.120769	0.904247	0.956317	0.126517	0.608169	-0.306222	-0.023207	0.300347	0.12505	-0.30227	-1.82164	0.023207	-2.34839
A0A287AXX0	PfkB domain-containing protein OS	-0.450743	0.289526	-0.161424	-0.134614	0.107798	0.0936953	0.106394	0.640363	-0.932042	-0.853432	-0.920546	-0.0936953	0.687136	0.102173	0.484798	-1.26847
P53366	ADM OS	-2.04496	0.176593	-1.11752	-0.496153	-0.083651	0.250115	0.083651	0.111092	-0.405817	-0.420742	-0.993255	0.238138	0.62115	1.90817	1.139	-1.41326
A0A287B2L0	Uncharacterized protein OS	-0.442618	0.315118	-0.384593	0.0770777	0.009439	0.571132	0.214832	0.536509	-0.706047	-0.754221	-1.29813	-0.009439	0.0618548	-0.139362	0.175512	-2.59002
F1RFB8	2-aminoethanethiol (Cysteamine) dioxygenase OS	-1.35639	0.438472	-0.918807	-0.17849	0.249875	0.471912	0.328532	0.722811	-0.902128	-0.69402	-1.07829	0.17849	0.249875	-0.394759	0.280637	-1.4706
F1SI90	Uncharacterized protein OS	-0.449081	0.453501	0.148728	0.567598	0.471338	0.704984	0.392881	0.801425	-1.24458	-1.05696	-1.32854	-0.0917745	-0.184189	-0.742531	0.0917745	-3.05094
F1SV59	Poly(ADP-ribose) glycohydrolase ARH3 OS	-0.243441	0.74816	-0.720517	-0.158073	0.383482	0.578498	0.423597	0.871231	-0.65778	-0.0830865	-0.459912	0.0830865	1.00062	-0.277339	0.649	-1.18396
A0A287BCD1	RPN13_C domain-containing protein OS	-2.6171	0.860432	-1.6629	-0.358666	0.109307	0.653843	0.812887	1.02113	-1.0591	-1.4924	-1.50625	0.41019	-0.109307	0.707829	0.722749	-2.25564
F6QAM9	Adenylosuccinate lyase OS	-1.90492	0.139996	-0.899225	-0.0144655	0.0144655	0.441887	0.168728	0.720346	-1.14645	-1.77939	-1.71299	0.0443051	-0.442894	0.790691	0.712933	-1.7331
A4Z6H1	Adenylosuccinate synthetase isozyme 2 OS	-0.840925	0.384452	-0.706695	-0.0258995	0.422354	1.02426	0.147047	0.872801	-0.611713	-0.214661	-0.26799	0.0258995	0.578216	-0.261967	0.300106	-2.15391
A0A287BAF3	Adenylosuccinate synthetase isozyme 1 OS	0.159376	0.170276	-0.013092	0.496541	0.013092	0.554741	0.332943	0.546399	-0.424025	-0.153593	-0.777917	-0.194956	0.250236	-0.342083	-0.046955	-2.31577
F1SSF7	Adipocyte enhancer-binding protein 1 OS	-1.13116	0.487819	-0.301846	-0.0877802	0.203467	0.220229	0.220229	0.345561	-1.13725	-0.992278	-1.43049	-0.0658431	0.0658431	0.0816531	0.32024	-1.86813
A0A287BGH4	Uncharacterized protein OS	-0.475161	0.363975	-0.624151	-0.114963	0.127787	0.567822	0.198784	0.360719	-0.790319	-0.991953	-1.22642	0.180437	0.114963	-0.251108	0.153098	-2.53051
A0A287BMR7	Uncharacterized protein OS	-0.949546	0.171529	-0.551536	-0.0175288	0.0175288	0.407371	0.208175	0.391011	-0.699154	-0.841701	-1.112	0.0175288	0.15588	-0.361116	0.171529	-2.61207
F1RW30	AF4/FMR2 family member 1 isoform X5 OS	-0.154746	0.292347	-0.085227	0.239135	0.015584	0.583679	0.29903	0.594584	-0.456275	-0.414133	-0.882611	-0.022232	0.244684	-0.015584	0.450766	-2.21821
A0A287B8T6	AF4/FMR2 family member 4 isoform X1 OS	-1.08608	0.164045	-0.570222	-0.0355637	0.233919	0.695806	0.488132	0.746303	-0.699435	-0.534708	-0.719232	0.0355637	0.0820593	-0.0941347	0.404845	-2.60203
I3LLQ8	AAA domain-containing protein OS	-0.14484	0.62849	-0.585412	-0.348373	0.28812	0.5474	0.286713	0.790124	-0.816851	-0.28843	-0.640554	0.14484	1.02761	-0.593162	0.592505	-1.3704
A0A287A363	Uncharacterized protein OS	-0.340612	0.349736	-0.972194	-1.07147	0.795014	0.891902	0.092092	-0.002717	-0.745744	-0.965104	-0.807804	0.002717	0.544866	0.737511	1.55538	-0.428075
A0A287B5F1	Kynurenine formamidase OS	-1.64936	-0.00168701	-1.25855	-0.439624	-0.054843	0.388242	0.145806	0.345908	-0.5337	-0.522708	-1.07652	0.493624	0.233294	0.598024	0.910353	0.00168701
A0A287A110	Clathrin_bdg domain-containing protein OS	-1.34754	0.291265	-0.520313	-0.0467767	0.0494386	0.34317	0.175413	0.670728	-0.805222	-0.959899	-1.30612	0.0467767	0.0639917	-0.171403	0.231575	-2.659
F1RT17	N(4)-(Beta-N-acetylglucosaminyl)-L-asparaginase OS	-1.35216	0.272336	-1.18538	-0.364584	-0.0401621	0.621078	0.369882	0.872509	-0.820009	-0.487362	-0.939772	0.0535696	0.157814	0.0401621	0.0508987	-2.23017
A0A287AC08	Uncharacterized protein OS	-2.23513	1.08487	-1.97048	0.23745	0.756378	1.90381	1.08487	1.7081	-1.30099	-0.743209	-1.22972	-0.015841	0.015841	-0.670989	0.146052	-3.06768
F1SNM7	Arf-GAP domain and FG repeat-containing protein 1 isoform X1 OS	-0.93197	-0.0587845	-0.515521	0.123419	0.0637892	0.412925	0.172826	0.518967	-0.0177572	-0.417397	-0.662363	0.0279529	0.0623728	-0.146151	0.0177572	-2.51129
A0A287AMJ9	Arf-GAP domain and FG repeat-containing protein 2 isoform X1 OS	0.0224344	0.271596	-0.185079	-0.115069	0.335221	0.587471	0.263442	0.457692	-0.237015	-0.381144	-0.337968	-0.0224344	0.178022	-0.357597	0.0578899	-1.90882
F1S2H1	Uncharacterized protein OS	0.052103	0.738244	0.250517	0.460188	0.580482	0.903179	0.671185	0.974203	-1.20226	-1.03298	-1.46378	-0.052103	-0.417585	-0.581816	-0.064337	-3.03866
B8XSJ0	Acylglycerol kinase OS	-0.38615	0.374752	-0.522191	0.0587468	0.380138	0.693872	0.415185	0.716187	-1.08226	-0.724629	-0.880748	-0.0587468	0.448375	-0.615569	0.308511	-1.28211
A0A287B3F4	Uncharacterized protein OS	-0.275564	0.175686	0.0380569	0.0925562	0.190754	0.261441	0.151503	0.875058	-0.614417	-0.672311	-0.483077	0.0142563	-0.38301	-0.39984	-0.0142563	-3.04041
F1SUU6	Uncharacterized protein OS	-1.07664	-0.131264	-0.544711	0.199861	0.0210575	0.27019	0.0591925	0.940867	-0.276742	-0.0568656	0.13389	0.149686	0.0437776	-0.879407	-0.0210575	-2.19467
A0A287BNJ6	Protein argonaute-1 isoform 1 OS	0.0271979	0.220511	-0.192971	-0.0271979	0.138872	0.415634	0.165794	0.0523359	-0.561104	-0.565123	-0.691203	-0.610083	0.207614	-0.599741	0.0588779	-2.15614
K7GP47	PlsC domain-containing protein OS	0.324146	0.365028	-0.057306	0.174061	0.057306	0.136183	0.210971	0.397412	-1.21909	-0.963634	-1.15507	-0.384307	0.114369	-0.865786	-0.091467	-1.75213
A0A287A3U2	Alkylglycerone-phosphate synthase OS	-0.806666	-0.361414	-0.105248	0.0850483	0.265297	0.363541	0.465035	0.452334	-0.557266	-0.519243	-0.546604	-0.0850483	0.141526	0.206	0.51577	-2.10213
A0A286ZQI4	Alkylglycerone-phosphate synthase OS	-0.0504165	0.0638072	-0.122191	0.345773	0.078773	0.513771	0.217765	0.193219	-0.271725	-0.460036	-0.35374	-0.0471635	0.0471635	-0.247255	0.164045	-2.04717
A0A287AM82	Anterior gradient protein 2 homolog OS	0.394778	0.583729	-0.595808	-0.0131935	0.275459	0.310927	0.0131935	0.335737	-0.621846	-0.156347	-0.243701	-0.0920665	0.609391	-0.221814	0.454899	-2.71051
A0A286ZS39	Uncharacterized protein OS	-1.02993	0.691497	-1.07529	-0.25232	0.366962	0.536597	0.223053	1.01238	-0.985949	-0.364795	-0.775507	0.118464	1.22737	-0.556821	0.244511	-0.118464
F1RG45	Angiotensinogen preproprotein OS	0.491479	0.539447	0.084973	-0.450655	0.404177	0.133486	0.004511	-0.117427	-0.582251	-0.959953	-0.810053	-0.004511	-0.054233	1.36548	1.37247	-1.47804
I3LRT0	Uncharacterized protein OS	-0.233102	0.374032	0.611166	0.24019	0.315225	0.146391	0.197017	0.408198	-1.16454	-1.00071	-0.851157	-0.330474	0.333659	-0.328767	-0.146391	-1.58568
F1SHW5	Serine--pyruvate aminotransferase OS	-0.427918	0.155053	-0.589905	-0.229316	0.164322	0.121454	0.214903	1.00982	-0.831723	-0.302221	0.103668	0.0842651	-0.0842651	-0.75483	0.294246	-2.61687
F1SND2	Uncharacterized protein OS	-0.367926	0.683316	0.281166	0.776605	1.60043	1.64838	0.909197	1.88376	-0.657436	-0.283975	-0.565696	-0.281166	-0.318124	-1.03887	0.968238	-2.26443
F1S8P4	Uncharacterized protein OS	-0.531225	0.334718	-0.30122	0.165098	0.195014	0.512629	0.338378	0.488674	-0.409596	-0.212864	-0.623148	0.106204	-0.106204	-0.229024	0.376852	-2.85985
A0A287B4J2	Adenosylhomocysteinase OS	-0.309002	0.627666	-0.099349	0.15513	0.28334	0.284566	-0.0291116	0.635376	-0.776781	-0.519727	-0.607993	0.0291116	0.1817	-0.528315	0.423518	-1.74641
E7EI18	Adenosylhomocysteinase-like protein 1 OS	-0.287953	0.279176	0.358311	-0.02758	0.02758	0.172445	0.145137	0.491278	-1.4811	-1.50975	-1.04095	-0.287953	0.21058	-0.455001	0.445108	-2.19528
F1SMQ4	AdoHcyase_NAD domain-containing protein OS	-2.38796	0.470758	-0.198239	0.124632	0.255604	0.552505	0.495286	0.751331	-1.09357	-1.15027	-1.89436	-0.124632	0.232446	-0.279129	0.455838	-2.20612
A0A286ZSJ9	AdoHcyase_NAD domain-containing protein OS	-1.94918	0.195699	-0.0558955	-0.327433	0.0558955	0.309407	0.131098	0.367664	-1.45147	-1.80891	-2.0933	-0.68318	0.156106	0.0584245	0.469984	-2.59908
F1STN3	DUF4683 domain-containing protein OS	-0.881948	0.232476	-0.11143	0.232476	0.10568	0.618457	0.191436	0.567244	-0.195687	-0.53559	-0.566055	0.0749836	-0.0749836	-0.199093	0.0848217	-2.85752
A0A287A608	Uncharacterized protein OS	-0.62277	0.48949	-0.615415	0.0534575	0.218932	0.633284	0.429127	0.870012	-0.574434	-0.595985	-0.366716	0.236651	-0.0534575	-0.220073	0.295057	-2.67024
A0A286ZM70	Uncharacterized protein OS	-0.672094	0.360655	-0.563427	0.0200172	0.154757	0.508695	0.373786	0.795345	-0.584054	-0.590996	-0.4062	0.192976	-0.0200172	-0.229715	0.249767	-2.68194
A0A286ZPY1	Uncharacterized protein OS	-0.557466	0.330889	-0.497345	0.157612	0.284221	0.770589	0.474063	0.811387	-0.17587	-0.220037	-0.06095	0.249552	-0.210723	-0.275276	0.06095	-2.91768
A0A286ZXM0	PDZ domain-containing protein OS	-0.818382	0.232942	0.01893	0.309322	-0.106601	0.117815	0.805714	1.2798	0.036691	-0.01893	-0.886742	-0.30992	-0.271661	-0.42234	0.389421	-2.01393
I3LF82	Aryl hydrocarbon receptor OS	-1.72758	0.129537	-1.34529	-0.657043	0.01394	0.209211	-0.01394	0.104358	-0.642781	0.144848	-0.802116	0.259347	0.291279	-0.366551	0.346206	-2.48203
F1SE06	Aha1_N domain-containing protein OS	-0.491247	0.0887499	-0.113879	0.361229	-0.150321	0.379935	0.0410651	0.015871	-0.30419	-0.233178	-0.821699	-0.015871	0.426791	0.0787659	0.0701527	-1.5676
F1SFI7	Alpha-2-HS-glycoprotein OS	-0.885459	0.426481	-1.05788	-0.622428	0.945855	0.99262	0.378953	0.804994	-1.37421	-1.31048	-0.94298	0.132665	-0.132665	0.643138	1.27299	-0.9055
A0A287AK38	Alpha-hemoglobin-stabilizing protein OS	-0.01942	1.06053	-0.389614	-0.310986	0.230821	0.454048	1.74598	0.740519	-1.19922	-0.225693	-0.658654	0.01942	1.88237	-0.061717	1.84851	-1.66588
F1S9H0	Axin interactor, dorsalization-associated protein OS	-0.55094	0.806816	0.0274975	0.592387	0.380484	0.728511	0.697135	1.00584	-1.16491	-0.795796	-1.54951	-0.0274975	-0.204623	-0.789856	0.0744675	-2.88644
A5D9N3	Allograft inflammatory factor 1 OS	-0.0976845	0.484724	-0.503819	-0.0506255	0.126893	0.536188	0.636217	0.80025	-0.366085	0.0303955	-0.386979	0.247777	-0.0303955	-0.0843525	0.966862	-1.93501
A0A287AKV5	Uncharacterized protein OS	-0.090421	0.476576	-0.254957	-0.068133	0.408518	0.666449	0.354963	0.655158	-0.322347	-0.186874	-0.199864	0.255156	0.068133	-0.405884	0.0896431	-2.51993
F1RTH3	Uncharacterized protein OS	-0.866383	0.245739	-0.431622	-0.238503	0.0245322	0.220627	0.177778	0.397505	-0.942678	-1.08153	-1.22201	0.0203804	-0.0203804	0.220627	0.430211	-1.0638
F1RFM7	Uncharacterized protein OS	-1.49281	0.143127	-0.991204	0.192362	0.172151	0.556637	0.286062	0.985138	-0.733991	-0.41341	-0.481466	0.045858	-0.045858	-0.282947	0.093417	-2.06266
F1RUZ6	TPR_REGION domain-containing protein OS	-0.784541	0.757768	-1.28826	-0.396138	0.450364	0.755753	0.390588	1.07627	-0.729876	-0.279972	-0.718627	0.279972	0.66955	-0.347677	0.573297	-1.71583
I3L8V8	Uncharacterized protein OS	-1.30399	0.76104	-0.881701	-0.695661	0.43214	0.534502	0.42714	1.26634	-0.647388	-0.636877	-0.881701	0.180543	0.503955	-0.180543	0.905572	-2.19589
A0A286ZQ79	Adenylate kinase isoenzyme 1 OS	-0.493909	-0.0822615	0.0240475	0.406797	0.0412875	0.4902	-0.0240475	0.245764	0.236268	-0.0256785	-0.160735	0.123057	0.087286	-0.132342	-0.200713	-2.7583
A0A287AH85	Adenylate kinase 2, mitochondrial OS	-0.825719	0.0467078	-0.754528	-0.0983278	0.264054	0.598063	0.447106	0.869963	-0.511671	-0.0467078	-0.376016	0.130107	0.314589	-0.74388	0.357246	-2.43903
F1SK45	GTP:AMP phosphotransferase AK3, mitochondrial OS	-0.868558	0.174916	-0.74694	-0.0506018	0.213214	0.569399	0.328391	0.665877	-0.348479	-0.0600208	-0.362007	0.132821	0.0506018	-0.367844	0.166864	-2.91054
B1NI70	Adenylate kinase 4, mitochondrial OS	-0.94352	0.140178	-1.33376	-0.746364	0.0382979	0.410842	0.294278	1.02344	-1.11762	-0.0382979	-0.281872	0.184095	0.199281	-1.0206	0.125678	-2.67771
A0A287A3E1	Adenylate kinase isoenzyme 6 OS	-1.90475	0.087635	-1.17983	-0.691756	-0.135221	0.128221	0.098811	0.041463	-0.055659	-0.041463	-0.237897	0.34774	0.687357	0.165459	0.655032	-1.38026
A0A287BLS6	Tudor domain-containing protein OS	-1.26022	0.502023	-0.914046	-0.125261	0.332869	0.721323	0.412821	0.725739	-0.77031	-0.723807	-1.30997	0.125261	0.129267	-0.268981	0.26167	-2.37279
A0A287B518	A-kinase anchor protein 10, mitochondrial OS	-0.420808	0.148646	-0.359743	0.18876	-0.166857	0.358978	0.0975835	0.0270537	-0.0270537	-0.141766	-0.798113	0.306467	0.18876	-0.0912536	0.317364	-2.4472
A0A287AKU1	AKAP_110 domain-containing protein OS	-0.427484	0.597782	-0.0505425	0.220647	0.351185	0.837249	0.607767	0.76213	-1.07087	-0.885889	-1.51955	-0.206603	0.0550425	-0.880298	0.0505425	-3.17016
A0A287BE06	Uncharacterized protein OS	-1.96443	0.818051	-1.15151	-0.411375	-0.0713375	0.0713375	0.3007	0.897587	-2.41138	-2.73331	-2.75242	0.139008	0.153196	0.131209	1.01312	-2.34461
A0A287AUQ9	Uncharacterized protein OS	-1.15939	0.696752	-0.903046	-0.363527	-0.0179412	0.163877	0.375746	0.866266	-1.25606	-1.49642	-1.53923	0.166544	0.230385	0.0179412	0.753725	-2.47133
F1SCI4	Uncharacterized protein OS	-1.8376	0.31909	-1.08785	-0.0373195	0.0560559	0.529083	0.311313	0.489262	-0.76768	-1.03307	-1.7513	0.0373195	0.256822	-0.0558798	0.41966	-2.66987
A0A287AHC7	Uncharacterized protein OS	-0.773365	0.465229	-0.722935	-0.175158	0.31242	0.958746	0.468849	1.01017	-0.346967	0.073364	-0.224977	-0.073364	0.715317	-0.366189	0.471258	-2.25651
A0A287AT38	AKAP2_C domain-containing protein OS	-0.717829	0.258752	-0.58255	-0.0230435	0.145034	0.459143	0.306418	0.578442	-0.600472	-0.679226	-0.725184	0.126087	0.0230435	-0.164177	0.381381	-2.39102
F1SP07	Uncharacterized protein OS	-0.36469	0.77305	-0.0396395	0.763552	0.795363	1.08286	0.955154	1.07807	-0.967648	-1.03209	-1.47583	0.0396395	-0.148556	-0.790518	0.0476985	-3.15123
A0A287AEZ9	Uncharacterized protein OS	-1.04489	0.636416	-0.629093	-0.0206958	0.115171	0.222963	0.472423	0.994223	-0.586293	-0.0433682	-0.872598	0.0206958	0.219158	-0.475262	0.270309	-2.6177
F1SA04	Uncharacterized protein OS	-1.20363	0.264469	-0.662246	0.0787967	0.266854	0.649666	0.337754	0.559174	-0.755961	-1.10168	-1.22358	0.148992	-0.156547	-0.0787967	0.254891	-1.88766
F1SA03	Uncharacterized protein OS	-0.670051	0.226252	-0.462359	0.0007312	0.318267	0.594921	0.27662	0.744696	-0.515723	-0.853418	-0.490848	-0.0007312	0.123946	-0.355588	0.167567	-2.85871
A0A286ZYK6	Uncharacterized protein OS	-0.647626	0.436527	-0.530708	-0.079941	0.0813548	0.462798	0.079941	0.334701	-0.764665	-0.752021	-1.05333	0.205826	0.400737	-0.406618	0.513948	-2.09424
A0A287APF1	Uncharacterized protein OS	-2.17791	0.449012	-1.12988	-0.172289	0.267791	0.870119	0.405796	0.966744	-0.877182	-1.28714	-2.02141	0.456292	-0.235399	0.172289	1.14326	-1.69141
A0A287BDC1	Uncharacterized protein OS	0.118288	0.0270777	-0.474537	-0.0270777	0.318929	0.718377	0.356881	0.572005	-0.662582	-0.262935	-0.478844	0.138109	-0.185226	-0.403227	0.178321	-2.38897
I3L6L6	Uncharacterized protein OS	-0.166049	0.380379	-0.6498	0.149153	0.0687516	0.352544	0.415554	0.466219	-0.222499	-0.243586	-0.386765	-0.0687516	0.136967	-0.205158	0.327741	-2.72442
Q2TJA5	Aldo-keto reductase OS	-0.794793	0.423028	-0.252051	0.172915	0.486507	0.620968	0.436692	1.13227	-0.436748	-0.172581	-0.151984	0.447775	-0.276164	-0.6565	0.151984	-1.96399
A0A287A3Y9	Aldo-keto reductase family 1 member A1 OS	-1.00379	0.0113488	-0.357258	0.166811	0.188284	0.407819	0.0746932	0.958435	-0.300076	0.0053124	-0.213053	0.151861	-0.234322	-0.848139	-0.0053124	-2.15107
A0A287A5M7	Aldo-keto reductase family 1 member B1 OS	-0.740463	-0.0219647	-0.509902	0.114906	-0.0759301	0.205795	0.220009	0.181789	0.0219647	0.222364	-0.529585	0.237581	-1.03176	-1.12449	0.111097	-2.78
F1RYU4	Aldo-keto reductase family 1 member C3 isoform 2 OS	-1.66948	0.014789	-0.741828	-0.014789	0.417986	0.675269	0.506244	1.23741	-0.588177	-0.258365	-0.973867	0.197847	0.57735	-0.294185	0.524638	-1.42486
P82125	1,5-anhydro-D-fructose reductase OS	-1.88358	-0.456758	0.484899	0.693484	0.510996	0.809572	-0.0280405	0.304632	0.148586	-0.275151	-0.626958	0.377982	-0.134829	-0.0594225	0.0280405	-2.22935
F1SUP1	Aflatoxin B1 aldehyde reductase member 4 OS	-1.29414	0.138417	-0.705567	0.0613815	0.317097	0.633571	0.105904	1.08521	-0.485237	-0.316	-0.522874	-0.0110582	0.0198106	-0.710384	0.0110582	-2.00957
F1RHU2	Uncharacterized protein OS	-1.75845	0.366345	-0.598116	0.0568403	0.366345	0.753846	0.543089	0.769729	-0.235546	-0.930272	-0.80213	0.128394	-0.0978823	-0.0568403	0.231393	-2.53822
A0A287BGW4	Delta-aminolevulinic acid dehydratase OS	-1.26049	0.202742	-0.45368	-0.0031775	0.340874	0.734743	0.206878	0.895409	-0.733788	-0.736432	-0.981051	0.0031775	0.532107	-0.260491	0.156449	-1.45586
A0A287BAY9	Serum albumin OS	-0.794325	0.233624	-1.04821	-1.03565	0.813967	0.800017	-0.182566	-0.248692	-0.742355	-0.904225	-0.783774	0.182566	0.656425	1.17538	1.29542	1.24053
K7GLE8	CD166 antigen OS	-1.04466	0.494728	-0.584949	0.0060681	0.255188	0.467559	0.308836	0.737889	-1.0137	-0.813803	-0.989404	-0.0060681	0.509723	-0.0891575	0.328298	-1.33486
F1RHZ9	Uncharacterized protein OS	-0.541105	0.153984	-0.0477098	0.235056	0.0477098	0.318206	0.131169	0.816635	-0.676488	-0.419114	-0.318161	-0.0922323	0.339314	-0.469614	0.0831778	-2.19319
F1SC47	Delta-1-pyrroline-5-carboxylate synthase OS	-0.041047	0.0963056	0.112777	0.45099	0.202252	0.491632	0.165403	0.535609	-0.067796	-0.329818	-0.042705	0.041047	-0.317728	-0.337934	-0.122828	-2.6079
I3LRS5	Retinal dehydrogenase 1 OS	-0.80162	0.236125	-0.568342	-0.0530962	0.322151	0.459435	0.137781	0.824936	-0.397171	0.0143744	-0.734626	-0.0143744	0.129506	-0.561627	0.314871	-1.51331
I3LK62	Aldedh domain-containing protein OS	0.032353	0.55261	-0.465147	-0.232581	-0.032353	0.286926	-0.265262	0.537085	-0.449598	0.115342	-0.158486	0.048086	0.671138	-0.828994	0.235636	-2.31672
F1ST54	Aldedh domain-containing protein OS	-0.0125925	0.806895	-0.725559	-0.305329	0.17437	0.269968	0.254971	0.987407	-0.734509	-0.0162265	-0.153549	0.0125925	0.89949	-0.833619	1.03997	-0.6903
I3LEN7	10-formyltetrahydrofolate dehydrogenase OS	-0.75719	0.401927	-0.24585	0.15686	0.290462	0.452845	0.225207	1.0806	-0.524072	-0.374132	-0.735816	-0.0159245	0.0159245	-0.505867	0.43999	-1.85174
F1SG41	Carrier domain-containing protein OS	-1.89601	0.447788	-1.28505	-0.290211	0.318117	0.565807	0.289571	0.668703	-0.914487	-1.64615	-1.96587	0.00632935	0.000704851	-0.000704851	0.506516	-2.06266
Q2XQV4	Aldehyde dehydrogenase, mitochondrial OS	-0.607775	0.162743	-0.54656	-0.0153874	0.0153874	0.364035	0.230512	0.756407	-0.386659	-0.0620513	-0.276054	0.073643	0.0540141	-0.561622	0.0455194	-2.27783
A0A287BBJ7	Aldedh domain-containing protein OS	-0.0881575	0.686661	-0.479925	-0.0397175	0.269909	0.547512	0.182189	0.572213	-0.597712	-0.143757	-0.787498	0.0965485	0.0397175	-0.132827	0.786952	-1.41008
I3LNB4	Multifunctional fusion protein OS	-1.34518	0.183828	-0.522227	-0.0154306	0.102804	0.393355	0.520353	1.02456	-0.678916	-0.623188	-0.958846	0.0154306	0.333384	-0.0694586	0.334608	-1.92623
A0A287AR05	Succinate-semialdehyde dehydrogenase OS	-0.691412	0.524055	-0.543444	-0.162138	0.186716	0.492475	0.308588	0.948031	-0.874496	-0.039091	-0.696795	0.039091	1.0113	-0.180874	0.385742	-1.47942
F1S3H1	Methylmalonate-semialdehyde dehydrogenase acylating, mitochondrial isoform 1 OS	-0.419727	0.483412	-0.746939	-0.099674	0.392972	0.76057	0.049889	0.919892	-0.467345	0.335855	-0.479499	-0.049889	0.980598	-0.328961	0.335855	-1.63667
A0A286ZL79	Aldedh domain-containing protein OS	-0.648383	0.500858	-0.431123	-0.0940885	0.62587	0.860108	0.412385	1.06746	-0.648383	-0.578389	-0.583654	-0.112996	0.791609	0.0940885	0.575978	-1.34366
I3LQA1	Aldehyde dehydrogenase family 8 member A1 isoform 1 OS	-0.0472666	0.360015	0.0834111	0.276613	0.0472666	0.362468	-0.0818735	0.374674	-0.401719	-0.281924	-0.494134	-0.0802066	0.593067	-0.125903	0.16157	-2.09697
F1S232	4-trimethylaminobutyraldehyde dehydrogenase OS	-1.05755	0.312221	-0.567846	0.034414	0.35039	0.492566	0.351645	1.30122	-0.514277	-0.155777	-0.421311	-0.034414	0.0699231	-0.801753	0.279624	-1.31195
A0A287A1V5	Fructose-bisphosphate aldolase OS	-1.02595	0.518103	-1.29089	-0.0844405	0.219467	0.501628	0.0635775	0.749671	-0.785917	-0.393984	-0.898028	-0.0164215	0.423317	0.0164215	0.227504	-1.86632
A0A286ZTA4	Fructose-bisphosphate aldolase OS	-0.83777	0.530874	-0.7237	-0.0862695	0.227682	0.536754	-0.0400145	0.94856	-0.551589	0.136122	-0.366765	0.0400145	0.983431	-0.529298	0.204223	-1.03652
A0A287B8Z2	Fructose-bisphosphate aldolase OS	-0.291795	0.982718	-0.70477	-0.169191	0.613306	0.669508	0.555973	0.985275	-0.895449	-0.365904	-0.622002	0.144754	0.867312	-0.144754	0.570805	-1.17109
A0A287B3Y6	Alpha-ketoglutarate-dependent dioxygenase alkB homolog 3 OS	-0.497284	0.225619	-0.430918	0.0367097	0.111492	0.388182	0.263765	0.665995	-0.335844	-0.286996	-0.484988	0.00218705	0.0842448	-0.452702	-0.00218705	-2.36559
A0A287A496	2OG-FeII_Oxy_2 domain-containing protein OS	-0.362352	0.222611	-0.380249	0.134324	0.209375	0.529973	0.349897	0.665055	-0.581783	-0.536482	-0.473225	0.14965	0.32802	-0.134324	-0.205219	-2.61672
F1RLH4	Alpha-ketoglutarate-dependent dioxygenase alkB homolog 6 isoform 2 OS	-0.947175	0.0163733	-0.46463	0.213442	0.213442	0.482902	0.125818	0.486105	-0.217137	-0.491675	-1.05786	0.174271	0.0104545	-0.0104545	-0.0301451	-2.54952
F1SBT3	Alpha-ketoglutarate-dependent dioxygenase alkB homolog 7, mitochondrial OS	-1.02194	0.28119	-0.748405	-0.0881961	0.20217	0.521259	0.323289	0.876692	-0.638112	-0.342741	-0.480809	0.104843	0.225192	-0.365491	0.0881961	-2.33337
A0A287AH92	ALMS_motif domain-containing protein OS	-0.748167	0.16966	-0.396561	0.155279	0.108542	0.574253	0.144729	0.452291	-0.427714	-0.483904	-0.525423	-0.013169	0.116662	-0.443546	0.013169	-2.51076
K7GQF9	Arachidonate 15-lipoxygenase OS	1.6747	1.50527	-1.29987	-0.18439	-0.1666	0.1666	1.10349	0.799412	-0.41183	-0.61436	-0.64103	0.521783	0.467168	-0.27657	0.797584	-2.57257
A0A287BSC3	Alkaline phosphatase OS	-0.630679	0.102016	-0.253443	0.0703076	0.330911	0.735572	0.21178	0.555734	-0.16845	-0.600207	-0.469466	0.271308	-0.275498	-0.0198897	0.0198897	-2.25162
A0A287A8G5	Uncharacterized protein OS	-1.91822	0.111545	-1.16243	-0.388698	-0.0610025	0.192197	-0.0804405	0.206593	-0.0759785	0.178087	-0.43036	0.0610025	0.330411	0.559808	0.473423	-1.7745
A0A287BET5	RRM domain-containing protein OS	-0.470693	0.0205275	-0.229841	0.102026	0.0674602	0.304372	0.194623	0.488084	-0.204276	-0.291317	-0.320316	0.0910545	-0.0205275	-0.154466	0.103391	-2.45855
F1SP14	Uncharacterized protein OS	-0.456307	1.0215	0.0809305	0.513651	1.4007	1.46325	0.959511	1.58685	-1.06176	-0.614937	-0.853717	-0.0809305	-0.671937	-1.38012	1.71466	-0.543377
P04366	Protein AMBP (Fragment) OS	0.0862689	0.648677	-0.576075	-0.602285	0.598303	0.626278	-0.259351	0.0937093	-0.611935	0.0951928	-0.767708	-0.359428	0.622167	-0.0862689	0.372245	-0.751618
F1SI99	Activating molecule in BECN1-regulated autophagy protein 1 isoform X1 OS	-0.654547	0.252919	-1.14041	0.447578	-0.0438979	0.605605	0.359423	0.581052	-0.893593	-0.266762	-0.880904	0.169983	0.102578	-0.337812	0.0438979	-2.55444
F1RT08	S-adenosylmethionine decarboxylase proenzyme OS	-0.231053	0.53116	-1.00737	-0.793452	0.681768	0.880921	0.404556	0.686592	-1.04845	0.120763	-0.142841	-0.120763	0.802217	-0.902226	0.540782	-2.72268
F1SUH7	N-acetylglucosamine-6-phosphate deacetylase OS	-0.543051	-0.111986	-0.359605	0.144162	0.360427	0.564023	0.320668	1.26017	-0.186421	0.0777704	0.0992928	0.110642	-0.365489	-1.2127	-0.0777704	-2.96626
I3L7P3	Uncharacterized protein OS	-2.88824	0.537435	-1.76113	-0.463744	0.841111	1.47054	0.808299	1.4248	-1.35919	-1.44501	-2.68771	0.664731	-0.657736	0.685073	0.463744	-1.84462
A0A287AGR2	Uncharacterized protein OS	-1.73811	0.576535	-0.756388	0.134471	0.340166	1.05509	0.524493	0.894494	-1.22043	-1.08887	-1.74331	-0.0210003	0.0210003	-0.220426	0.351184	-2.35721
F1SAM7	Protein amnionless OS	-1.06555	0.110985	-0.424079	-0.0477742	-0.00427255	0.156417	0.12933	0.393883	-0.311987	-0.624663	-1.01575	0.00427255	0.375337	0.17672	0.103051	-1.78474
F1RWT7	Angiomotin isoform X1 OS	-1.03082	0.411609	-0.587306	-0.039704	0.0988787	0.518292	0.308113	0.613856	-0.752628	-0.742929	-1.32789	0.157017	0.039704	-0.189729	0.106946	-2.39466
F1STJ4	Angiomotin-like protein 1 isoform X1 OS	-0.039645	0.872961	-0.356077	0.296747	0.597942	0.621812	0.420387	0.764875	-1.11866	-0.983832	-1.14296	0.143111	-0.027749	-0.707622	0.027749	-3.14103
F1SL93	Angiomotin_C domain-containing protein OS	-1.12917	-0.0241969	0.0241969	-0.186234	0.140406	0.333835	0.212586	0.176336	-0.579929	-0.700583	-0.993589	0.288137	-0.342264	0.125273	0.144165	-2.44959
A0A286ZLH5	AMP deaminase OS	-0.54215	0.565555	-0.259586	-0.104555	0.240773	0.57465	0.365232	0.755489	-0.829472	-0.419694	-0.705943	0.104555	0.677431	-0.196334	0.633499	-2.19247
I3LCG9	AMP deaminase OS	-0.869207	0.404026	-0.964357	-0.191132	0.120012	0.569428	0.434188	0.642296	-0.62678	-0.189215	-0.832827	0.298673	0.496262	-0.120012	0.777841	-1.92555
I3LIR4	Aminomethyltransferase OS	-0.358825	0.291429	-0.0726015	0.46107	0.492507	0.446238	0.270855	0.970298	-0.292258	-0.0546394	0.0289045	0.107874	-0.16068	-0.853499	-0.0289045	-2.53779
D4NZI4	Anaphase-promoting complex subunit 13 OS	-2.11629	-0.012645	-0.977069	-0.533124	0.012645	0.243426	0.035531	0.190954	-0.5671	-1.1113	-0.842739	0.431474	0.546622	0.458335	0.886618	-3.84965
A0A287BSR1	Anaphase-promoting complex subunit 16 OS	-0.300582	0.419309	-0.316457	0.0280405	0.139886	0.561816	0.402436	0.719019	-0.703175	-0.772651	-0.687606	0.0820226	-0.0280405	-0.0932105	0.459486	-2.10695
A0A287A474	Angiogenin OS	-0.52878	0.146328	-0.669707	-0.336792	0.0857155	0.440623	-0.0857155	0.914285	-0.46442	-0.128959	-0.888717	0.32593	0.460652	0.95156	1.00163	-1.57697
A8BV05	Angiopoietin-like protein 2 OS	-0.552364	0.868859	-0.201867	0.343665	0.19045	0.393665	0.376006	0.74501	-0.58889	-0.191298	-1.06051	-0.0445704	0.129928	-0.392493	0.0445704	-2.45644
F1S7Z7	Fibrinogen C-terminal domain-containing protein OS	0.0786895	0.000869498	0.547077	-0.0078475	0.657049	0.16654	-0.170577	0.294006	-0.367422	-0.569393	-0.640815	-0.178428	-0.000869498	0.868052	1.02927	-2.43871
Q2TNK5	Angiopoietin-related protein 4 OS	-0.821514	0.252846	0.591362	-0.146324	0.187099	0.413168	0.62978	0.988717	-0.507092	-0.332799	-0.37022	-0.0219965	0.0219965	0.430198	-0.112461	-1.9322
F1S3I1	Fibrinogen C-terminal domain-containing protein OS	0.0163274	0.385892	-0.12382	0.398335	0.417354	0.659303	0.433931	0.702814	-0.430865	-0.420895	-0.762329	-0.0163274	-0.224281	-0.102946	0.216109	-2.65794
A0A287AUI5	Uncharacterized protein OS	-1.2365	0.278993	-0.262635	-0.249511	0.0720436	0.0326812	0.0156995	0.156164	-0.455819	-1.0397	-1.40921	0.337317	0.701128	-0.0156995	0.727916	-2.65401
K7GLA8	Uncharacterized protein OS	-0.769141	0.217791	-0.232273	-0.0402394	0.103606	0.384398	0.159346	0.273962	-0.558283	-0.75502	-1.26025	0.0402394	0.19978	-0.427482	0.200989	-2.36359
K7GNH3	Uncharacterized protein OS	-0.488292	0.308092	0.343831	0.386177	0.433098	0.655903	0.398052	0.675548	-1.14356	-0.930752	-1.3383	-0.0101175	-0.206905	-0.916462	0.0101175	-3.25036
F1RGE8	ANK_REP_REGION domain-containing protein OS	-0.919011	0.148989	-0.433982	0.220264	0.0485989	0.591658	0.213928	0.467193	-0.678431	-0.678431	-0.978715	-0.0485989	0.158258	-0.231916	0.310921	-2.5871
F1SFC9	RBR-type E3 ubiquitin transferase OS	0.00431518	-0.00431518	0.109386	0.089245	0.0157425	0.317613	0.0811094	-0.23539	-0.135628	-0.240479	-0.276612	0.180917	0.143643	-0.541739	-0.0144496	-2.99282
I3LVP6	LEM domain-containing protein OS	-0.875443	0.247852	-0.459065	0.0726852	-0.00146165	0.419417	0.285516	0.711306	-0.79462	-0.45305	-1.04302	0.00146165	0.328055	-0.41163	0.178508	-2.22581
F1SIQ4	Uncharacterized protein OS	-1.15516	0.452721	-0.981353	-0.23149	0.415248	0.550961	0.395701	0.46018	-0.815013	-0.547923	-1.1184	0.246158	0.23149	-0.495443	0.524876	-3.00524
F1SEJ0	Ankyrin repeat and MYND domain-containing protein 2 OS	-0.590617	0.358568	-0.254733	-0.510044	0.073578	0.045143	0.241714	0.358568	-0.863458	-1.03499	-1.02347	-0.045143	0.177041	0.102778	0.299032	-1.95349
A0A287AKA9	ANK_REP_REGION domain-containing protein OS	-0.915918	0.385783	-0.908589	-0.253856	-0.0668332	0.212875	0.154587	0.567583	-1.08462	0.19937	0.170824	-0.461617	1.13816	-1.46699	0.0668332	-2.20516
A0A286ZRF8	ANK_REP_REGION domain-containing protein OS	-1.33803	0.668733	-0.499376	-0.0649205	0.355007	0.718644	0.507136	0.692644	-0.659456	-0.591347	-0.951546	0.428638	0.0649205	-0.293036	0.401938	-2.34845
F1SM99	Ankyrin repeat domain-containing protein 12 isoform X1 OS	-0.528545	0.178748	-0.692282	0.0910574	0.230086	0.461499	0.204048	0.292073	-0.864431	-0.605996	-0.960215	-0.0357655	0.0371065	-0.579029	0.0357655	-3.21418
A0A287AJ61	Ankyrin repeat domain-containing protein 13A isoform X1 OS	-1.84962	0.657395	-0.866025	-0.134532	0.518559	0.599711	0.559838	0.826435	-0.696486	-0.643225	-1.29962	0.282379	0.134532	-0.432645	0.417439	-2.51755
A0A287BN54	ANK_REP_REGION domain-containing protein OS	-1.84258	0.23181	-0.520657	-0.0352305	0.125472	0.659296	0.330846	0.708639	-0.738493	-0.706998	-1.39758	0.0352305	0.278551	-0.157619	0.310865	-2.4568
A0A287AC41	ANK_REP_REGION domain-containing protein OS	-1.16424	0.287208	-0.912057	-0.135357	0.0838544	0.384608	0.151837	0.503661	-0.580362	-0.674193	-1.11955	0.168665	0.264507	-0.0838544	0.423957	-2.01354
A0A287BSK7	Uncharacterized protein OS	-2.03337	0.09273	-1.26191	-0.560931	-0.027771	0.278217	0.228228	0.027771	-0.55894	-0.673298	-1.13056	0.817714	0.809429	0.649208	1.11191	-1.24239
A0A287BAC0	Serine/threonine-protein phosphatase 6 regulatory ankyrin repeat subunit A isoform d OS	-0.30546	0.150258	-0.283377	0.340027	-0.0127543	0.319732	0.322135	0.249523	-0.589414	-0.614465	-0.800562	0.0880927	0.229185	-0.369927	0.0127543	-2.44148
A0A287B957	ANK_REP_REGION domain-containing protein OS	-0.293106	0.195492	-0.212085	0.267578	0.489432	0.711517	0.237124	0.382185	0.00680165	-0.00680165	-0.0736271	0.307208	-0.25834	-0.641197	-0.276533	-2.9099
A0A287BCW4	ANK_REP_REGION domain-containing protein OS	0.488331	0.574471	-0.144766	-0.324359	0.013282	0.102582	0.500118	0.775038	-0.551263	-0.013282	-0.777309	-0.124715	0.209828	-0.165099	0.588892	-2.32853
F2Z556	Ankyrin repeat domain-containing protein 46 isoform 1 OS	-1.74392	0.090079	-1.56106	-0.581987	-0.00944	0.096482	0.00944	0.023185	-0.336125	-0.064887	-1.4999	0.928591	1.0716	0.379594	1.14657	-1.72817
F1STJ8	Ankyrin repeat domain-containing protein 49 OS	-0.519521	0.0007357	-0.419704	0.115194	0.0863807	0.274515	0.116552	0.251216	-0.187504	-0.254379	-0.250873	0.117909	0.0399063	-0.318988	-0.0007357	-2.71821
I3LD98	ANK_REP_REGION domain-containing protein OS	0.035083	0.926902	0.363943	0.327081	0.618216	0.833266	0.6121	1.07387	-1.20616	-1.17046	-1.53665	-0.059947	-0.42453	-0.902514	-0.035083	-3.4233
F1SKL6	ANK_REP_REGION domain-containing protein OS	-0.915907	0.443386	-0.822797	-0.0887415	0.51072	1.0732	0.561745	1.21736	-0.743568	-0.673703	-0.876127	0.237029	0.0887415	-0.404126	0.382879	-2.2301
F1RZ13	Ankyrin repeat and SAM domain-containing protein 1A isoform X6 OS	-0.430554	0.258835	-0.200447	0.017936	-0.017936	0.32333	0.0460048	0.28498	-0.382999	-0.526503	-0.984902	0.101893	0.300209	-0.297629	0.178699	-2.58127
F1RK68	Uncharacterized protein OS	0.441384	0.419655	-0.241008	-0.12553	0.219748	0.0259685	0.0015413	0.325623	-0.834191	-0.157837	-0.519425	-0.0015413	0.798521	-0.552952	0.34274	-2.38655
F1RPC7	Ankyrin repeat and SAM domain-containing protein 4B OS	-1.16309	0.646241	-0.90064	-0.278572	0.305138	0.477428	0.354423	0.808007	-0.81914	-0.582765	-1.00867	0.278572	0.37964	-0.813686	0.589736	-2.65408
F1SSF0	Ankyrin repeat and SAM domain-containing protein 6 isoform X3 OS	-0.514538	0.0266922	-0.134886	0.12516	0.0411772	0.493911	0.238858	0.325433	0.240114	-0.462525	-0.296693	-0.15952	-0.0266922	-0.619988	0.185086	-2.64064
F1SR83	bVLRF1 domain-containing protein OS	0.429098	0.0497025	0	0.337902	-0.132308	0.561975	0.0710974	0.130727	-0.669176	0	-0.818553	-0.140482	0.37048	-1.02703	-0.412066	-3.06386
A0A287A905	Anoctamin OS	-1.2898	0.293649	-1.27312	-0.491408	-0.00130801	0.293955	0.157092	0.279225	-0.30672	0.00130801	-0.265323	0.413349	0.576258	-0.125857	0.720202	-1.38802
F1SIV3	Acidic leucine-rich nuclear phosphoprotein 32 family member A OS	-1.39024	0.484227	-0.522346	0.0397453	0.320029	0.251047	0.339492	0.75815	-1.25639	-1.31604	-1.07474	-0.0397453	0.706619	-0.380258	0.400993	-2.43915
A0A287AXA0	Uncharacterized protein OS	0.213133	0.864654	-0.8492	-0.77775	0.559857	0.437266	0.550231	1.11371	-1.9652	-0.94464	-0.235853	-0.213133	1.33586	-1.11414	0.97759	-2.70678
K7GMF9	Aminopeptidase OS	-0.790307	0.673217	-0.886423	-0.245343	0.0846746	0.347964	0.319523	0.78334	-0.999143	-0.479695	-0.868463	0.112068	0.716496	-0.0846746	0.865223	-0.743183
K9J4T3	Anthrax toxin receptor OS	-2.08195	0.110117	-1.25791	-0.357153	0.0029005	0.198944	-0.0762645	0.228283	-0.0426355	-0.0029005	-0.74236	0.370002	0.712251	0.123875	0.629188	-2.26631
F1SJB5	Annexin OS	-1.08781	0.535967	-1.37732	-0.92666	-0.0586033	0.390569	0.475122	0.550786	-1.56997	-0.9414	-1.3975	0.0586033	0.31322	0.150416	1.11738	-0.833001
F1S2E2	Annexin OS	-0.218321	0.427528	-0.290282	0.0428647	0.103237	0.407317	0.229138	0.909747	-0.48765	-0.199966	-0.267167	-0.0428647	0.310771	-0.478772	0.266577	-1.01372
A0A287A080	Annexin OS	0.307276	1.68309	-0.960453	-0.307276	1.04859	0.984092	0.31562	1.30393	-1.59252	-0.627284	-0.920703	-0.469854	0.77611	-0.905114	1.34934	-1.14964
A0A286ZJV6	Annexin OS	-0.966032	0.676709	-1.1312	-0.616628	0.185273	0.508449	0.340551	1.02788	-1.10805	-0.402034	-0.666476	0.083393	1.2154	-0.188718	0.826378	-0.083393
P08132	Annexin A4 OS	-1.15131	0.341046	-0.330588	-0.0496168	0.106309	0.416256	0.315469	0.563767	-0.665885	-0.67751	-0.97743	0.0496168	0.451906	-0.125606	0.345648	-1.57829
A0A287A531	Annexin OS	-0.424588	0.410509	-0.340407	0.0599547	0.0673117	0.349059	0.0790054	0.321021	-0.723989	-0.708829	-0.522797	-0.0599547	0.635049	-0.144116	0.518581	-1.4143
F1S0V3	Annexin OS	0.298897	0.345971	-0.131373	-0.255879	-0.134601	0.0272239	0.0656981	0.159598	-0.250617	-0.471551	-0.621968	-0.0272239	0.440093	0.0272239	0.248997	-1.51085
I3LEY2	Annexin OS	-0.355436	0.596711	-0.587713	-0.241812	0.312476	0.407134	0.306953	0.703546	-0.809676	-0.353248	-0.542151	0.082946	0.991236	-0.29121	0.485001	-0.082946
A0A287BCY4	Amine oxidase OS	-1.25082	0.437234	0.465227	0.0812714	0.022197	-0.350748	0.0913652	0.13663	-0.675607	-0.321758	-0.214842	0.682064	-0.022197	0.332926	-0.0378279	-1.19718
I3LDH5	Uncharacterized protein OS	-0.153828	0.0885545	0.0459935	0.764527	0.147717	0.0321045	-0.0321045	0.601281	-0.604357	-0.556351	-1.47973	0.355776	-0.192033	-0.852284	0.0390655	-2.39285
F1RFI2	AP complex subunit beta OS	-0.368085	-0.0657806	-0.345335	0.230191	0.017026	0.409204	0.0786094	0.498895	-0.286367	0.120069	-0.373829	0.0869971	-0.017026	-0.504252	0.0786094	-2.40485
F1S3C7	AP-1 complex subunit gamma OS	-0.966979	0.738886	-0.805858	0.261339	0.829045	1.39997	1.1295	1.13823	-0.829919	-0.752818	-1.18239	-0.0161915	0.0161915	-0.692058	0.0612535	-2.99647
F2Z5I7	AP-1 complex subunit mu-1 isoform 2 OS	-0.412579	0.160031	0.140045	0.261798	0.118503	0.238491	0.16251	0.0207895	-0.531751	-0.482508	-0.674876	-0.0928672	-0.0207895	-0.0420372	0.105679	-1.91508
I3LVB8	AP complex subunit sigma OS	-2.04646	0.731688	-0.945622	-0.051368	0.62404	0.677386	0.43242	0.754348	-0.930482	-1.27212	-1.37493	0.017383	0.321717	-0.017383	0.539586	-1.42074
F1RH60	AP-2 complex subunit alpha OS	-0.932564	0.475608	-0.582904	-0.036673	0.318243	0.492708	0.337301	1.18292	-0.846894	-0.463756	-0.785135	0.036673	0.134342	-0.56628	0.29893	-2.01395
F1RZ02	AP-2 complex subunit alpha OS	-0.720109	0.195229	0.242023	0.71534	0.328884	0.434508	0.426652	1.1137	-0.362253	-0.116169	-0.0302495	0.0302495	-0.425853	-0.64014	-0.107995	-2.6029
F1S182	AP complex subunit beta OS	-0.746279	0.440376	-0.321312	-0.128915	0.128915	0.338838	0.291741	0.734967	-0.425946	-0.321312	-0.502412	0.163266	0.508763	-0.347271	0.303339	-1.40482
A0A286ZU22	MHD domain-containing protein OS	-0.659301	0.244352	-0.311559	0.585532	0.0565735	1.00756	0.336864	0.65392	-0.381447	-0.220208	-1.17205	0.215401	-0.0565735	-0.463786	0.103979	-1.85304
A0A287BIG4	AP complex subunit sigma OS	-0.630625	-0.129815	0.0338506	0.119098	0.00285405	0.316498	0.237604	0.0885568	-0.330513	-0.459964	-0.542772	-0.00285405	0.0477227	-0.269037	0.0952509	-1.9592
A0A287B311	AP-3 complex subunit beta OS	-0.526397	0.352029	-0.299032	0.171694	-0.00378265	0.389473	0.187724	0.262787	-0.69007	-0.304627	-0.806972	0.00378265	0.497378	-0.0913399	0.412392	-1.49194
M3VK02	AP-3 complex subunit delta-1 isoform 3 OS	-1.57469	0.664052	-0.680611	-0.0160469	0.0160469	0.43828	0.372191	0.68144	-0.699439	-0.325856	-0.823033	0.0586912	0.615365	-0.238931	0.450075	-1.32038
A0A287B006	MHD domain-containing protein OS	-0.458065	0.114808	-0.0371958	0.645432	0.196714	0.578647	0.231383	0.602273	0.0340248	-0.252464	-0.196447	-0.0340248	-0.318438	0.0844947	-0.0340248	-2.57071
A0A287AAA9	Clat_adaptor_s domain-containing protein OS	-0.267264	0.605383	0.0249722	-0.0249722	0.131401	0.175065	0.318812	0.494534	-1.21802	-1.00534	-1.09142	-0.440951	0.600816	-0.229361	0.70151	-1.51833
A0A287AZL8	Clat_adaptor_s domain-containing protein OS	-0.475946	0.333075	0.0125332	-0.00419385	0.00419385	0.10772	0.0208246	0.316331	-1.3746	-1.22006	-1.05703	-0.00559655	0.650557	-0.243037	0.792103	-1.42626
I3LM40	AP4E_app_platf domain-containing protein OS	-0.0109235	-0.377127	0.378488	0.13395	-0.519221	0.235935	-0.0732075	-0.67417	0.251547	0.0109235	-0.875269	0.321801	0.149185	-0.425961	0.193946	-3.07321
A0A287AD88	MHD domain-containing protein OS	-0.346592	0.619083	0.440594	0.628317	0.836838	0.987944	0.460117	1.10583	-1.3222	-1.54329	-1.41714	-0.183656	-0.372066	-0.778651	0.183656	-3.42513
F1RMN5	Uncharacterized protein OS	-2.05337	0.922875	-0.999999	-0.194139	0.656519	0.980663	0.727858	1.37407	-0.762219	-1.27637	-1.3457	0.435419	-0.0034935	0.0034935	0.683958	-1.81348
I3LFA7	Uncharacterized protein OS	0.056477	0.816897	0.006225	0.105037	-0.149053	0.217729	0.361545	0.619321	-0.649398	-0.006225	-0.729708	-0.187527	-0.042631	-0.123397	0.732302	-2.49886
I3LJX4	Uncharacterized protein OS	-1.51313	0.433294	-0.496051	-0.162291	0.156604	0.446601	0.214796	0.611243	-0.576767	-0.745571	-1.17413	0.0646638	0.443286	-0.0646638	0.274467	-2.05995
A0A287A0Q9	Uncharacterized protein OS	-0.427429	0.142267	-0.0416346	0.20973	-0.12692	0.254198	0.38642	0.339222	-0.751732	-1.1393	-1.7305	0.106004	0.0416346	-0.346233	0.473375	-1.77328
O19063	Serum amyloid P-component OS	0.357439	0.297343	0.0853587	-0.795678	-0.101681	-0.0777775	0.323223	0.0777775	-1.34081	-0.733002	-0.285009	-0.361275	0.194541	0.748801	0.985174	-1.23884
F1SPS7	Acylamino-acid-releasing enzyme OS	-0.718495	0.189361	-0.314962	0.0073309	0.0232884	0.307802	-0.0073309	0.319599	-0.661726	-0.685108	-0.925688	-0.175967	0.526128	0.0784841	0.319599	-1.60264
A0A287BTC2	DNA-(apurinic or apyrimidinic site) lyase OS	-0.610874	0.664354	-0.616227	-0.040231	0.386452	0.661039	0.317935	0.943488	-0.811175	-0.47337	-0.877115	0.040231	1.01188	-0.043833	0.423446	-0.381628
F1SHH7	Uncharacterized protein OS	-0.244704	0.43434	-0.282127	-0.0401995	0.0733295	0.43434	0.359572	0.602645	-0.752074	-0.587687	-0.582763	0.0401995	0.626225	-0.212024	0.686606	-1.70852
A0A286ZZL6	Methylthioribulose-1-phosphate dehydratase OS	-0.662432	0.127052	-0.200656	0.129764	0.0688929	0.480394	0.432875	0.410748	-0.272238	-0.486005	-0.600445	0.304347	-0.0688929	0.0927165	-0.153735	-1.66478
A0A287B1H0	Uncharacterized protein OS	-0.416809	0.415656	-0.363407	-0.142402	0.244033	0.341358	0.142402	0.462414	-0.359529	-0.359529	-0.700953	0.205283	0.362644	-0.226433	0.170837	-2.44119
A0A287A5V7	Amyloid-like protein 2 isoform 1 OS	-1.06978	0.519259	-1.26286	-0.451513	0.296187	0.530415	0.22556	0.609055	-0.94655	0.0364764	-0.742351	-0.0364764	0.577134	-0.254137	0.108626	-1.65016
A0A287A6K7	Str_synth domain-containing protein OS	-0.122482	0.375514	-0.188544	-0.0905507	0.222039	0.56364	0.13374	0.24593	-0.376369	-0.222746	-0.356247	0.0351187	0.540215	-0.0351187	0.71965	-1.58532
K7GM40	Apolipoprotein A-I OS	-0.425356	1.10546	-0.454395	-0.374009	0.633538	0.831349	0.287894	-0.082669	-0.101338	-0.739466	-0.51986	0.133231	0.347234	0.082669	1.23926	-2.25776
F1RP34	NAD(P)H-hydrate epimerase OS	-1.36016	0.155727	-0.943247	-0.20572	0.223556	0.547983	0.238481	1.00023	-0.473138	0.0623561	-0.310435	0.0255436	0.166172	-0.696206	-0.0255436	-2.09089
F1S1A9	Apolipoprotein A-II preproprotein OS	-1.66296	0.28397	-0.884888	-0.756428	0.65568	-0.058016	0.129435	0.087661	0.354766	-0.377692	-0.865818	-0.265161	0.058016	1.1199	1.39418	-2.12445
O46409	Apolipoprotein A-IV OS	-0.186695	1.1076	-0.813308	-0.220317	1.10999	0.88667	0.500147	0.255934	-1.14812	-0.258845	-0.621415	0.186695	0.355949	-0.942678	0.349223	-2.47577
A0A287BM29	Apolipoprotein A-IV OS	0.452891	0.77999	-0.735738	-0.421016	0.950812	0.668025	0.253957	-0.262834	-0.809468	-0.0708831	-0.16108	0.0708831	0.297254	-1.13545	0.108546	-2.93943
C1KBZ5	Apolipoprotein A-V OS	-0.623513	-0.176218	-0.292749	0.100593	0.331478	0.563274	0.44265	0.923198	-0.100593	0.274488	-1.23331	-0.635875	0.187355	-1.29864	0.102083	-3.64835
A0A287AG13	Apolipoprotein B-100 OS	-1.32236	0.527775	-1.05363	-0.509512	0.060754	0.541954	0.827929	0.979739	-0.261584	-0.504646	-0.879761	-0.060754	0.397379	1.0225	0.93388	-1.78823
A0A287AGN1	Uncharacterized protein OS	-0.927421	0.51599	-0.711781	-0.143365	0	0.343739	0.574289	0.784385	-0.534459	-0.747041	-1.10664	0	0.148098	1.14329	1.1766	-1.81714
D3Y264	Apolipoprotein C-II OS	-0.390829	0.667257	-0.819386	-0.267612	0.958085	0.933116	0.74047	1.00197	-0.708346	-0.545076	-1.23782	-0.204187	0.570833	0.204187	1.43514	-1.95825
P27917	Apolipoprotein C-III OS	-0.0700015	0.416003	-0.0028875	0.0028875	0.524359	0.68144	0.428929	0.196732	-0.394964	-0.679417	-0.902328	-0.227853	-0.44912	1.46424	1.0686	-1.94245
A0A286ZPG0	Uncharacterized protein OS	-1.21996	0.251664	-0.236887	0.100047	0.438445	1.12298	0.598349	0.7361	-0.100047	-0.670701	-0.737971	-0.102262	-0.224774	1.81449	1.24558	-1.72085
F1SQX9	Apolipoprotein D OS	-1.78399	0.536827	-2.12279	-0.238703	0.189209	0.668315	0.406915	-0.025371	-0.873365	-0.731814	-1.20649	-0.007307	0.007307	1.00083	1.15462	0.036098
F1RM45	Apolipoprotein E OS	-0.683406	0.13359	-0.339767	-0.13359	0.614363	0.631212	0.313987	0.629117	-0.637277	-0.597476	-1.32547	-0.441797	0.165748	0.282337	1.06936	-1.88426
A0A286ZFW3	Beta-2-glycoprotein 1 OS	-0.610484	0.330803	-0.918474	-0.115818	0.434532	0.810071	0.115818	0.529963	-0.132667	-0.173491	-0.637284	0.190531	-0.154009	1.40419	1.01041	-1.18662
A0A140TAK8	Beta-2-glycoprotein 1 OS	-1.64198	0.0123355	-1.37288	-0.509463	-0.0123355	0.23252	0.237023	0.270275	-0.61454	-0.474586	-0.779601	0.912277	0.529491	0.412203	1.18809	-1.06091
A0A287AVQ5	Apolipoprotein M OS	0.235684	-0.012693	-1.2537	-0.635498	0.362861	0.885636	0.395392	-0.459378	-0.769718	-0.699328	-0.402345	0.445963	0.012693	1.38084	1.72342	-1.26383
Q68RU1	Ovarian and testicular apolipoprotein N OS	-1.40212	0.232202	-0.814124	-0.766334	0.619397	0.806832	0.328891	0.261319	-0.605246	-0.924544	-1.13985	0.377571	-0.232202	1.11028	1.27638	-1.30076
K7GPW3	MICOS complex subunit OS	-0.255315	0.146589	-0.611459	-0.515467	0.200177	0.352311	0.137003	0.660206	-0.986277	0.428381	-0.0521137	-0.0773967	0.556156	-0.687283	0.0521137	-2.27712
K7GNC6	MICOS complex subunit OS	-1.0887	-0.027762	-0.11446	0.370734	0.0336386	0.31874	0.221694	0.216537	0.027762	-0.551324	-0.651488	0.127298	-0.129157	0.755571	-0.120974	-1.90325
A0A287ARA5	Uncharacterized protein OS	-1.13678	0.4792	-1.11809	-0.42961	0.00213945	0.389497	0.32036	0.78921	-0.860746	-1.02227	-1.29228	0.0730034	0.0972062	-0.00213945	0.39276	-2.35292
A0A287AVB3	Uncharacterized protein OS	-0.417091	0.362741	-0.364623	0.147371	0.445883	0.702783	0.237413	0.538336	-0.729035	-0.582728	-1.3247	-0.102816	0.102816	-0.687012	0.611254	-1.98498
Q03472	Apolipoprotein R OS	-0.382493	-0.08653	-0.266805	-0.185748	0.043453	0.47218	0.0063	-0.0063	0.527132	-0.025409	-0.723708	0.248273	0.527132	1.93669	1.51543	-0.964718
P79307	Amyloid-beta A4 protein OS	-0.542619	0.29552	-0.334157	-0.0473669	0.369581	0.464909	0.314693	0.411369	-0.395152	-0.661695	-0.922857	0.19046	0.0473669	-0.282823	0.285838	-2.33603
B5LX40	Adaptor protein phosphotyrosine interaction PH domain and leucine zipper containing 1 OS	-0.16773	0.543817	-0.438378	-0.131938	0.131938	0.485758	0.158334	0.410313	-0.615346	-0.432146	-0.827965	0.195032	0.553271	-0.363337	0.536422	-1.70017
B6DZ39	APPL2 OS	0.001584	0.283737	-0.269064	0.0725756	-0.046671	0.1388	-0.001584	0.352329	-0.979562	-0.578641	-0.592902	0.144542	0.572771	-0.428294	0.401115	-1.90649
F1S6K5	Pribosyltran domain-containing protein OS	-0.497454	0.147017	-0.387561	0.0631495	0.0720552	0.346145	-0.064413	0.993765	-0.399822	-0.000778001	0.000778001	-0.049848	0.52758	-0.801921	0.0764873	-1.59982
Q7YRZ1	Aprataxin OS	-1.15353	0.143275	-0.381126	0.04937	-0.04937	0.20883	0.498207	1.16986	-0.798308	-0.646305	-1.54677	-0.23837	1.25094	0.149224	0.213096	-2.3747
A0A287AT23	Aquaporin-1 OS	-0.296345	0.353361	0.272241	0.0748834	0.229904	-0.0748834	0.275531	0.294035	-0.863507	-0.973766	-0.856287	-0.31767	0.259005	-0.349416	0.324003	-1.83484
F1RTM6	Androgen receptor OS	-1.96601	1.33777	-1.34975	-0.046515	0.751851	2.16707	1.07262	1.74317	-0.973929	-0.870069	-1.0851	0.232932	0.046515	-0.135816	0.345936	-2.525
I3LPU3	Uncharacterized protein OS	-0.0694564	0.408193	-0.107176	0.0806835	0.0694564	0.301878	0.162214	0.446667	-0.713797	-0.261658	-0.538226	-0.277698	0.471403	-0.391384	0.49047	-1.88615
F1RM54	Uncharacterized protein OS	-2.09718	-0.0016305	-1.43613	-0.598476	-0.00713252	0.156403	0.0016305	0.0138435	0.0269145	-0.0152615	-1.13998	0.388137	0.378668	0.0129925	0.720276	-2.29155
A0A287AL76	Coatomer subunit delta OS	-0.977739	0.189456	-0.673924	0.119795	-0.108984	0.72333	0.343643	0.237232	-1.28003	-1.13308	-1.56134	0.0692137	-0.0692137	0.0744847	0.477969	-1.23045
A0A287B5T6	Uncharacterized protein OS	-1.09935	0.311975	-0.503452	-0.458397	-0.014604	0.2383	0.313213	0.763391	-0.799998	-0.770851	-0.865711	0.014604	0.28951	0.292024	0.704233	-1.03808
Q56P20	ADP-ribosylation factor 4 OS	-1.00278	0.426325	-0.323538	-0.190502	0.0572365	0.39446	0.515709	0.898854	-0.83671	-0.630819	-1.00278	-0.0572365	0.460923	0.136429	0.80052	-2.03778
Q007T5	ADP-ribosylation factor 6 OS	-0.0151868	0.327926	-0.320042	-0.411347	0.0421273	0.0294288	0.0151868	0.147737	-1.1906	-0.268606	-0.569776	0.0322603	0.701465	-0.584883	0.21408	-0.646944
A0A287AQ96	Arf-GAP domain-containing protein OS	-0.26295	0.0793158	-0.0872478	0.215788	-0.0793158	0.430979	0.245141	0.445346	-0.528502	-0.436473	-0.923522	0.104602	0.305751	-0.291986	0.241346	-2.28285
A0A287A3U5	Arf-GAP domain-containing protein OS	-0.524054	0.0546847	-0.179536	0.130279	-0.0546847	0.205856	0.212083	0.336992	-0.385986	-0.420247	-0.730665	0.11441	0.0643533	-0.431851	0.10641	-2.62035
A0A287BQU4	Arf-GAP domain-containing protein OS	-1.04635	0.25929	-0.614169	0.0507844	0.078556	0.614561	0.386942	0.630596	-0.559638	-0.694148	-0.990459	0.019605	-0.019605	-0.369404	0.245881	-2.5812
F1RU02	SEC7 domain-containing protein OS	-1.8595	0.051945	-1.22	-0.309433	-0.066645	0.183564	0.06457	0.249671	-0.579963	-0.051945	-0.836525	0.177923	0.817747	0.484754	0.709175	-1.83331
F1SBE8	SEC7 domain-containing protein OS	0.293549	0.496545	0.3017	0.311152	0.0999305	0.559079	0.116967	0.278485	-1.20634	-1.25047	-1.55702	-0.282709	-0.519367	-1.2772	-0.0999305	-3.37634
A0A287B8Z3	AH domain-containing protein OS	-0.0868663	0.245806	-0.145215	-0.126621	0.220942	0.548929	0.0868663	0.192954	-0.146917	-0.116579	-0.743852	0.293028	0.356885	-0.451071	0.280417	-2.44687
A0A287AHY2	AH domain-containing protein OS	-0.616395	0.293688	-0.189421	-0.0816957	0.206443	0.514755	0.356103	0.248932	-0.346837	-0.337826	-1.02998	0.0816957	0.447546	-0.627333	0.334846	-1.93724
F1SA26	Arginase OS	0.0407474	0.369537	-0.696218	-0.155961	-0.0407474	0.211171	0.0585771	0.808479	-0.86241	-0.547208	-0.296208	0.0496898	0.197825	-0.671513	0.387282	-2.22978
F2Z517	Arginine and glutamate-rich protein 1 OS	-1.74994	0.512877	-0.848924	-0.0207543	0.400897	0.815061	0.51072	0.993988	-1.12587	-1.47318	-1.79725	0.0581512	0.0207543	-0.279739	0.673795	-2.79725
A0A287AZG0	Uncharacterized protein OS	-0.653633	0.319491	-0.274749	-0.0638369	-0.117914	0.210678	0.238334	0.646835	-0.564462	-0.73581	-0.71293	0.0638369	0.434399	0.304618	0.43212	-2.05263
F1RS73	Rho GTPase-activating protein 10 OS	-0.45051	0.534923	-0.549727	0.0636175	0.206222	0.949115	0.662049	1.00791	-0.554513	-0.227798	-0.48435	-0.0636175	0.341152	-0.669191	0.271213	-2.56897
A0A287AYI7	Uncharacterized protein OS	-0.214135	0.0503298	-0.0503298	0.430271	-0.221021	0.514563	0.0603041	0.216278	-0.349064	-0.252423	-0.906013	0.129611	0.306437	-0.521113	0.114647	-2.1536
I3LUA7	Uncharacterized protein OS	-2.3687	0.0724145	-1.4949	-0.56032	-0.0494135	0.0972165	0.0494135	0.231018	-0.561124	-0.285139	-2.47747	0.0973005	0.560139	1.22688	1.64658	-1.67302
A0A286ZZA8	Rho GTPase-activating protein 17 isoform 1 OS	-0.577313	0.227607	-0.835007	-0.030978	0.030978	0.556204	0.437211	0.811641	-0.634383	-0.474052	-0.900457	0.343941	0.404324	-0.039332	0.652705	-1.70706
A0A287BC86	Rho GTPase-activating protein 17 isoform 1 OS	0.0571892	0.124503	-0.625582	-0.429998	-0.130438	-0.0795812	0.290848	0.237503	-0.771583	0.456749	-0.606876	0.0905225	0.274546	-0.0571892	0.38497	-1.82463
A0A287B0W8	Rho-GAP domain-containing protein OS	-0.755757	0.368092	-0.650538	0.0529537	-0.0393432	0.440295	0.152399	0.433027	-0.613515	-0.536079	-1.29978	0.0393432	0.302377	-0.433829	0.266611	-2.44144
A0A287BHC4	Rho-GAP domain-containing protein OS	-6.5624	0.486364	-1.83448	-0.884323	0.371885	0.946192	0.298071	0.538793	-1.68957	-2.5356	-6.5624	0.0419728	-0.0419728	0.464405	0.23072	-2.6364
I3LDR4	Uncharacterized protein OS	-0.748088	0.110522	-0.286998	0.070959	-0.0074752	0.421837	0.232376	0.440985	-0.57007	-0.57007	-0.881944	0.0074752	0.147803	-0.360126	0.054039	-2.8522
A0A287BGM7	Rho GTPase-activating protein 22 isoform X1 OS	-1.84049	0.0657625	-1.33741	-0.53503	-0.220463	-0.0657625	-0.176089	0.189159	0.505576	0.216862	-0.462664	0.916743	0.505576	0.0956835	0.893299	-1.95742
F1RW15	Uncharacterized protein OS	0.061583	0.384684	-0.0865153	-0.107792	0.312594	0.542185	0.303944	0.464474	-0.309179	-0.488614	-0.581723	0.313826	0.0229503	-0.25705	-0.0229503	-2.74138
A0A287A2H2	Uncharacterized protein OS	-0.523139	0.450748	-0.66821	0.257162	-0.0682226	0.377556	0.53083	0.562674	-0.219003	-0.122732	-0.881095	0.0202576	0.0867663	-0.0202576	0.403882	-2.5253
A0A287AXU8	Uncharacterized protein OS	-1.81971	0.255834	-1.0213	-0.379557	-0.102112	0.239928	0.110117	0.266197	-0.252023	0.673856	0.102112	-0.242878	0.809712	-0.700315	0.368433	-1.69719
F1RR27	Uncharacterized protein OS	-0.253809	0.142866	-0.390804	-0.00213525	0.0510449	0.285167	0.0106385	0.00213525	0.0288917	-0.363076	-0.905643	0.0849926	-0.216944	-0.350317	0.11816	-2.59281
F1S540	Rho GTPase-activating protein 29 isoform a OS	-0.655881	0.299132	-0.347175	-0.0441695	0.0441695	0.268786	0.45257	0.739085	-0.681415	-0.424837	-0.55567	0.344119	0.475859	-0.403431	0.49764	-2.19598
A0A287BSE0	Rho GTPase-activating protein 30 isoform 1 OS	-0.263447	0.0397826	-0.267243	0.432758	0.0134245	0.357094	0.637492	0.37912	-0.209489	-0.240874	-0.931315	-0.0134245	-0.145201	0.499074	0.696182	-2.18414
I3LII1	Rho GTPase-activating protein 31 OS	-0.884891	0.23812	-0.60849	0.0388539	-0.0388539	0.281393	0.228842	0.274646	-0.396231	-0.573576	-0.832963	0.0612418	0.0533798	-0.252866	0.286991	-2.62102
A0A287BT02	Uncharacterized protein OS	-0.935531	0.105035	-0.124263	0.0781178	0.238654	0.50533	0.179102	0.508358	-0.575707	-0.794541	-1.22626	0.163821	-0.0781178	-0.135246	0.186682	-2.71707
A0A287BSS5	Rho GTPase-activating protein 33 isoform X6 OS	0.0042391	-0.175582	-0.0042391	0.160322	0.218558	0.609718	0.342975	0.477945	0.0238297	-0.405174	-0.0328649	0.352967	-0.705742	-0.905649	-0.332203	-4.50391
F1RM07	Rho GTPase-activating protein 35 OS	-0.533015	0.145057	-0.212837	0.201325	-0.00755345	0.465892	0.136836	0.36862	-0.305013	-0.44401	-0.627874	0.00755345	0.324664	-0.30688	0.170784	-2.74959
F1RSQ1	Uncharacterized protein OS	-0.553554	0.0113243	-0.527202	0.0999324	0.145692	0.588777	0.0584851	0.239484	-0.328315	-0.0113243	-0.452984	0.171395	0.0232599	-0.430425	-0.0655963	-3.1187
A0A287BES7	Uncharacterized protein OS	0.00149655	0.50074	-1.07683	-0.358299	-0.190081	0.19171	0.236859	0.415787	-0.322301	0.185144	-1.12825	-0.00149655	0.0586549	-0.455507	0.879089	-2.31297
F1STH9	Rho GTPase-activating protein 42 OS	0.0039185	0.048549	0.16216	0.381348	0.0621239	0.437977	0.316123	0.509082	-0.231559	-0.287849	-0.560867	-0.0039185	-0.184491	-0.742981	-0.0830565	-3.00077
A0A287BH96	Rho GTPase-activating protein 45 isoform 1 OS	-2.04093	1.17501	-1.9193	-0.121623	0.0730076	0.403857	0.770239	1.66771	-0.68468	-0.0730076	-1.13048	-0.214615	0.616755	0.120064	0.766427	-0.713666
I3LD06	Rho GTPase-activating protein 5 isoform X1 OS	-1.60705	0.0378269	-1.10104	0.159485	0.288983	1.22329	0.719136	0.311739	-0.66142	-0.349722	-0.855648	-0.0378269	0.30495	-0.328453	0.287836	-2.18139
F1SG15	Rho-GAP domain-containing protein OS	-0.191107	0.0793158	-0.30858	-0.0793158	0.348713	0.851836	0.191082	0.335721	-0.184286	-0.583531	-0.576816	0.117081	0.51301	-0.406395	0.255212	-2.80368
K7GN21	Rho-GAP domain-containing protein OS	0.041618	0.284037	-0.292003	0.115901	0.266026	0.594223	0.0159822	0.305358	-0.0159822	-0.202345	-0.260333	-0.0159822	0.0901983	-0.647222	-0.0546945	-2.98978
E7EI20	Rho GDP dissociation inhibitor alpha OS	-1.05631	0.163243	-0.144125	0.122427	0.0157043	0.253071	0.164462	0.0170547	-0.857639	-0.872564	-1.05915	0.108561	0.0304878	-0.0157043	-0.0577275	-1.2968
A0A287B0I3	Uncharacterized protein OS	-1.16935	0.523518	-1.11015	0.158609	-0.145006	0.34862	0.586378	0.528183	-0.240966	-1.09932	-1.50837	0.145006	-0.389225	1.45963	0.62282	-1.38483
A0A287AFF7	Uncharacterized protein OS	-0.421605	0.296135	-0.352699	0.166813	-0.0264241	0.528769	0.342097	0.516904	-0.485264	-0.22585	-0.89958	0.0216961	0.357904	-0.0216961	0.516904	-2.34677
A0A287AJM5	Rho guanine nucleotide exchange factor 10-like protein isoform 1 OS	-1.52487	-0.0141445	-0.876496	-0.150537	0.0434156	0.312537	0.134999	0.127825	0.0141445	-0.119473	-0.310899	0.241198	0.297271	-0.401411	0.472869	-2.39107
F1RHK9	Uncharacterized protein OS	-0.712958	0.229518	-0.137425	0.0964094	-0.015051	0.316117	0.259764	0.14648	-0.426231	-0.644136	-1.20356	0.015051	0.257368	-0.193694	0.348002	-2.60873
A0A287AV56	Uncharacterized protein OS	-0.336352	0.305338	-0.179132	0.013304	-0.013304	0.447619	0.208875	0.320806	-0.134637	-0.295865	-0.809143	0.230456	0.213982	-0.107309	0.113718	-2.63605
I3LPE0	DH domain-containing protein OS	-2.09009	-0.014167	-1.29573	-0.61915	-0.061498	0.207999	0.021365	0.223231	0.014167	-0.267036	-0.47126	0.553564	0.355383	0.114497	0.349995	-2.31117
A0A287ANX2	Uncharacterized protein OS	-0.880207	0.158838	-0.210137	0.0124851	0.201687	0.553225	0.0624944	0.429927	-0.695885	-0.488985	-0.812861	-0.0124851	0.0124851	-0.684692	0.138818	-2.62143
F1SUT6	DH domain-containing protein OS	-1.02469	0.498346	-0.588589	-0.0171314	0.282618	0.567329	0.431433	0.764366	-0.800565	-1.14801	-1.30112	0.0748468	0.0171314	-0.141429	0.250419	-2.48488
A0A287A1S5	Rho guanine nucleotide exchange factor 18 isoform X3 OS	-0.996559	0.267843	-0.630951	-0.117865	0.18095	0.533534	0.16513	0.481418	-0.769092	-0.878347	-0.896111	0.117865	0.263278	-0.42535	0.423261	-2.59527
A0A287B6A9	Rho guanine nucleotide exchange factor 2 OS	-0.444146	0.376015	-0.315949	-0.0176485	0.0176485	0.383927	0.18094	0.328785	-0.492986	-0.534989	-0.918411	0.0521026	0.331125	-0.186457	0.422846	-2.07382
I3LSI2	Uncharacterized protein OS	-0.91319	-0.026084	-0.297531	0.118772	0.0893931	0.19391	0.026084	0.244619	-0.653607	-0.747292	-0.998392	0.0501521	0.358223	-0.418926	0.229475	-2.2429
A0A287BP24	Uncharacterized protein OS	0.370711	0.896361	0.0508405	0.8528	0.154938	0.763617	0.446907	0.878129	-1.0195	-1.09883	-1.62804	-0.0849175	-0.332485	-1.00659	-0.0508405	-2.90733
A0A287BA40	DH domain-containing protein OS	-6.73476	-0.0981328	-2.12595	-1.04267	0.477618	0.578126	0.546941	1.31455	0.320525	-0.311851	-1.1771	0.257331	0.0981328	-0.134845	0.235636	-2.068
I3LFZ9	Uncharacterized protein OS	-0.138309	0.367401	-0.43318	0.229785	-0.123922	0.334208	0.123922	0.199596	-0.734561	-0.584746	-1.37903	0.198325	0.638897	-0.459032	0.350328	-2.74921
I3LQ81	Rho guanine nucleotide exchange factor 5 OS	-1.16217	0.499327	-0.780467	0.0077482	0.39595	0.780338	0.532918	0.886415	-0.928922	-1.03607	-1.0682	0.123226	-0.0077482	-0.0077482	0.547835	-2.52276
A0A287AH65	Rho guanine nucleotide exchange factor 6 isoform 1 OS	0.0879305	0.277736	-0.422393	0.0241226	-0.157339	0.265245	0.281462	0.418627	-0.457158	-0.546822	-1.15063	0.0592762	-0.0241226	-0.345667	0.443232	-3.12081
A0A286ZZJ2	Uncharacterized protein OS	-0.53982	0.544119	-0.406553	-0.0190541	0.0823339	0.382793	0.223497	0.599496	-1.05661	-0.820244	-1.45171	0.0190541	0.645048	-0.255156	0.565908	-1.59632
A0A287ASP4	ARID domain-containing protein OS	-1.09989	0.181837	-0.370871	0.103207	0.0697016	0.502259	0.204243	0.39488	-0.695562	-0.749567	-1.3061	-0.119848	0.194328	-0.0697016	0.234797	-2.34896
A0A287AEF8	ARID domain-containing protein OS	-1.21568	0.15511	-0.406947	0.157604	0.0702967	0.531893	0.234032	0.338836	-0.704666	-0.790997	-1.51202	-0.0368221	0.0368221	-0.0846507	0.0462736	-2.43485
I3LU38	Uncharacterized protein OS	0.0450665	0.558832	0	0.118461	-0.619355	0.188304	0	0.274549	-0.77207	-1.00556	-1.11848	-0.714029	-0.195819	0.285971	0.317483	-1.71403
F1S6T2	AT-rich interactive domain-containing protein 3A OS	-1.24139	0.0246605	-1.274	-0.291436	-0.0179485	0.333164	-9.35048e-05	0.0967765	-0.173486	-0.0986075	9.35048e-05	0.275729	0.497431	0.672557	0.902435	-2.70034
F1SIE5	Uncharacterized protein OS	-0.52105	0.053875	-0.636335	-0.053875	0.0890832	0.307582	0.339714	0.381062	-0.380402	-0.177585	-0.271544	0.15124	0.201066	-0.080842	0.311476	-2.40788
F1SSK5	ARID domain-containing protein OS	-0.649568	0.154268	-0.0833662	0.291072	0.0833662	0.46022	0.14269	0.212034	-0.692704	-0.701953	-1.20794	-0.0970267	0.192202	-0.586118	0.332426	-3.01694
A0A287BMI9	Uncharacterized protein OS	-1.04351	0.380989	-0.492695	0.0184183	0.0850501	0.538286	0.382167	0.509463	-0.396619	-0.10491	-1.06583	0.12078	-0.473387	-0.0184183	0.612445	-2.83201
F1RGW9	AT-rich interactive domain-containing protein 4B isoform X1 OS	0.0027272	0.0095165	0.035028	0.297175	0.056167	0.429625	0.040342	0.211445	-0.700608	-1.08134	-0.949089	-0.129749	-0.0827804	-0.525521	-0.0027272	-3.52356
F1SU48	ARID domain-containing protein OS	-0.346969	0.0034845	-0.531092	0.184568	0.49387	0.477695	0.247565	0.412426	-0.72194	-0.38287	-0.133149	-0.0034845	0.63407	-0.0641265	0.306517	-2.96556
A0A287A3V7	AT-rich interactive domain-containing protein 5B isoform 1 OS	-0.414505	0.0543285	-0.46835	-0.0543285	0.142124	0.376256	0.315003	0.319718	-0.609108	-0.410595	-0.584674	0.202082	0.101634	-0.0789376	0.126064	-2.49708
I3LD12	RBR-type E3 ubiquitin transferase OS	-0.481658	0.122679	0.381948	0.757642	-0.122679	0.278526	0.347155	0.206468	-0.801066	-0.844516	-1.11483	-0.156102	0.527394	-0.346908	0.365218	-2.77363
I3LU23	ADP-ribosylation factor-like protein 13B isoform 1 OS	-1.53314	0.510959	-1.05778	-0.063038	0.281819	0.512818	0.415544	0.58401	-0.804803	-0.542543	-1.25908	0.407506	0.063038	-0.340383	0.290811	-2.70357
A0A287A2Y6	ARL14 effector protein OS	-0.0077465	0.71159	-0.419542	0.145425	0.0230735	0.301275	0.0077465	0.882041	-1.14482	-1.22668	-1.29107	0.0369515	-0.167	-0.930472	0.0832435	-2.90723
F1SLQ2	Uncharacterized protein OS	0.255742	0.367403	-0.0291285	0.159739	0.482991	0.820961	0.280299	0.457644	-0.983111	-1.10589	-1.56163	-0.0674275	-0.0814535	-0.97952	0.0291285	-3.14135
A0A287B226	ADP-ribosylation factor-like protein 2 isoform 1 OS	-0.834018	0.400245	-0.406252	0.182042	0.287245	0.320271	0.221426	1.21559	-0.328355	-0.123674	-0.254449	0.00377475	0.288482	-0.908585	-0.00377475	-2.6617
F1RF32	ARL2_Bind_BART domain-containing protein OS	-1.56577	1.30695	-1.1701	-0.217163	1.00415	1.00739	0.60913	2.00523	-0.62133	0.075773	-1.08954	-0.075773	1.55192	-0.60806	1.02984	-1.03083
A0A286ZN47	ADP-ribosylation factor-like protein 3 OS	-0.336204	0.374399	-0.646307	-0.301015	0.275554	0.536645	0.238829	0.918892	-0.634091	-0.0994648	-0.0994648	0.0994648	0.482696	-0.716696	0.183308	-2.01943
A0A287A875	Uncharacterized protein OS	-0.276484	0.160124	0.0282918	-0.192072	0.246424	0.24526	0.166287	0.430756	-0.879953	-0.774672	-0.69431	0.0363893	0.0404213	-0.259862	-0.0282918	-1.80089
F1RFJ6	Uncharacterized protein OS	-0.615142	0.221622	-0.186486	0.0207237	0.1692	0.463667	0.125322	0.326785	-1.14638	-1.29979	-1.45964	-0.0207237	0.530499	-0.396193	0.60004	-2.75046
Q56P28	PRA1 family protein 3 OS	-0.849966	1.04787	-0.0136215	0.630755	0.759285	1.20132	0.811571	1.11083	-0.805885	-0.999476	-1.44271	0.0136215	-0.0993835	-0.673546	0.237811	-2.97099
A0A287A2L0	Uncharacterized protein OS	-1.35434	0.678171	-0.438982	-0.110965	0.147433	0.893369	0.642572	0.670111	-0.375041	-0.467595	-1.04811	0.212699	0.016879	-0.016879	0.982308	-2.2861
F1SFL1	Uncharacterized protein OS	-1.95158	0.777302	-1.34001	-0.894153	0.330245	1.40651	1.07652	1.09525	-0.944283	-1.12242	-1.34482	0.316627	-0.290549	0.290549	1.34672	-1.90121
F1RTB0	Armadillo repeat-containing protein 1 OS	0.248032	0.467325	-0.0731215	0.408986	0.62702	1.07472	0.361126	0.555023	-0.94622	-0.9026	-1.16439	-0.221118	-0.371599	-0.98324	0.0731215	-2.87205
F1SB68	Arm_2 domain-containing protein OS	-0.341077	0.0250095	-0.547715	0.44665	-0.0250095	0.335167	-0.0687305	1.02122	-0.906676	-1.14965	-1.95808	0.263251	0.719765	0.332113	0.984746	-0.544906
A0A287BSI6	Uncharacterized protein OS	-0.230393	0.336331	-0.316271	-0.14421	0.14421	0.488334	0.167782	0.668258	-0.71727	-0.325921	-0.682142	0.190974	0.608716	-0.280178	0.255811	-1.6382
K7GNG5	Arm_2 domain-containing protein OS	-2.19965	0.524299	-1.43907	-0.3744	0.287525	0.746843	0.671311	0.857841	-0.437004	-0.769808	-1.23152	0.354639	0.0297271	-0.0297271	0.0738496	-2.32391
F1SS94	Aryl hydrocarbon receptor nuclear translocator OS	-0.654603	0.319196	-0.219388	0.0200786	0.144666	0.548306	-0.0200786	0.411587	-0.80435	-0.539647	-0.938102	0.0313497	0.259344	-0.357726	0.171657	-2.59923
F1REX9	Actin-related protein 2/3 complex subunit OS	-0.991163	0.414545	-1.09602	0.0426426	0.165143	0.830144	0.16781	0.874895	-1.01819	-0.76326	-1.02426	0.110747	-0.0426426	-0.305677	0.399876	-1.58657
B5APU6	Actin-related protein 2/3 complex subunit OS	-0.639419	0.797467	-0.943969	-0.0553205	0.0798255	0.680954	0.541686	0.788831	-1.08853	-1.00273	-1.43903	-0.0415635	0.0415635	0.515171	0.959291	-1.37294
F1SS01	Arp2/3 complex 34 kDa subunit OS	-0.333528	0.383249	0.0639695	0.0787835	-0.0639695	0.391182	0.544899	0.574234	-0.141973	-0.572357	-0.630073	-0.128675	-0.242736	1.40169	0.991014	-1.7794
B5APU8	Actin-related protein 2/3 complex subunit 3 OS	-0.647005	0.536036	-0.82002	-0.523946	0.118821	0.328079	0.191077	0.748133	-1.02304	-0.0055215	-0.570042	0.0055215	0.703299	-0.483682	0.389584	-0.694722
A0A286ZPY9	Actin-related protein 2/3 complex subunit 4 OS	-0.26743	0.524377	-0.0674235	-0.0318835	0.0588215	0.142678	0.180685	0.610434	-0.671358	-0.3033	-0.3033	0.0318835	0.374772	-0.0968495	0.739442	-1.29726
B5APV0	Actin-related protein 2/3 complex subunit 5 OS	-0.505983	0.21701	-0.36927	-0.073667	0.130205	0.38342	0.327212	0.645477	-0.189279	-0.213911	-0.349641	0.163372	0.049715	-0.049715	0.266183	-2.7111
B5APV1	Actin-related protein 2/3 complex subunit 5 OS	-0.613168	0.226079	-0.453091	0.02005	0.239728	0.735982	0.463284	0.863998	-0.277565	-0.271744	-0.289278	0.325431	-0.02005	-0.129846	0.263975	-2.76845
A0A287B5T1	Uncharacterized protein OS	-1.25035	0.277715	-0.458863	0.15039	0.229326	0.554611	0.0935023	0.42437	-0.486195	-0.985087	-1.08303	0.259024	-0.0935023	-0.488168	0.219692	-2.43965
A0A286ZND1	Beta-arrestin-1 isoform X1 OS	-2.15767	0.135438	-1.35612	-0.65108	-0.02562	0.181142	0.050391	-0.120399	0.158834	-0.539542	-0.203737	0.572631	0.328575	0.02562	0.504039	-1.97438
F1RNX8	Arrestin_C domain-containing protein OS	0.173101	0.478464	0.055589	0.419262	0.628368	1.17843	0.02042	0.356183	-1.39011	-1.3636	-1.75962	-0.206512	-0.613316	-1.02881	-0.02042	-2.94346
A0A286ZTA6	Sulfatase domain-containing protein OS	-0.58881	0.22972	-0.712914	-0.204958	0.103494	0.325689	0.100714	0.7009	-0.415648	-0.26464	-0.533781	0.0782814	0.092343	-0.0782814	0.377136	-2.0533
A0A286ZRI8	Sulfatase domain-containing protein OS	-0.528497	0.339932	-0.360351	0.0388297	-0.169997	0.304433	0.443802	0.865235	-0.322199	-0.136506	0.0678526	0.811155	-0.0885257	0.091848	-0.0388297	-2.39537
I3LM95	Arylsulfatase D isoform alpha OS	-1.21057	0.268771	-0.370291	0.0149719	-0.0149719	0.206437	0.11262	0.348972	-0.512553	-0.88738	-1.40953	-0.308304	0.153577	0.0665734	0.147445	-1.80185
A0A287A0M2	Sulfatase domain-containing protein OS	-1.41486	-0.14374	-0.717353	-0.149008	0.269544	0.724181	0.035698	0.141618	-0.035698	-0.381405	-0.831309	0.413495	0.157354	0.561681	0.767701	-2.40222
F1REY9	Arylsulfatase K OS	-0.626491	0.440077	-0.168031	0.278261	-0.094127	0.362783	0.441352	0.697573	-0.513482	-0.613194	-0.602644	0.686863	0.282536	0.041528	-0.041528	-2.39952
K7GM93	NAD(P)(+)--arginine ADP-ribosyltransferase OS	-2.00496	-0.01786	-0.954414	-0.501329	-0.066199	0.131887	0.163512	0.054526	-0.492229	-0.522391	0.0977	0.205913	1.35023	0.636201	0.01786	-1.87123
F1RHN2	Uncharacterized protein OS	-0.912287	0.290059	-0.134907	0.0348404	0.0945275	0.331031	0.158362	0.54913	-0.848157	-0.804396	-0.979401	-0.0786306	0.458004	-0.0348404	0.0447268	-1.87987
F1S850	Arsenite methyltransferase OS	-0.52444	0.50535	-0.105774	-0.0872586	0.0872586	0.327012	0.10078	0.58736	-0.993766	-0.838605	-0.372852	0.183167	0.759205	-0.130838	0.359996	-1.16118
A0A287B5G7	Uncharacterized protein OS	-0.311569	0.463909	-0.698312	-0.461345	0.0956956	0.254422	0.0749171	0.502803	-0.80982	-0.103053	-0.0749171	0.0777049	0.549741	-0.791898	0.172032	-2.08112
A0A287AGL0	Uncharacterized protein OS	-0.682633	0.379546	-0.612125	-0.0985007	0.192516	0.530117	0.296031	0.526888	-0.214394	-0.295903	-0.682633	0.0985007	0.33962	-0.290197	0.548277	-2.30547
A0A287B4V4	Arf-GAP with SH3 domain, ANK repeat and PH domain-containing protein 2 isoform a OS	-1.90153	0.526774	-1.36332	-0.229352	0.464866	1.56586	0.730736	0.959475	-0.744206	-0.764028	-1.17717	0.451423	0.103165	-0.103165	0.504461	-2.03278
F1SA85	Arf-GAP with SH3 domain, ANK repeat and PH domain-containing protein 2 isoform X2 OS	-1.35438	0.302817	-0.438854	-0.0981987	0.0981987	0.264372	0.131536	0.377792	-0.925731	-0.58563	-1.41726	0.183088	0.262144	-0.657626	0.212234	-2.19896
A0A286ZZK0	ANK_REP_REGION domain-containing protein OS	-1.98578	-0.023942	-1.48431	-0.547758	0.139745	0.257115	-0.016763	0.229292	0.016763	-0.147967	-0.723829	0.223817	0.539459	0.457812	0.476359	-1.53953
K7GN41	Ankyrin repeat and SOCS box protein 9 isoform 2 OS	-0.776609	0.305503	-0.789275	-0.0507838	0.130954	0.45691	0.145669	0.530106	-0.623597	-0.679092	-0.741723	0.326789	0.326789	-0.10359	0.0507838	-2.27827
K7GNQ9	Ankyrin repeat and SOCS box protein 9 isoform 1 OS	0.311949	0.483955	-0.197725	0.37608	0.946029	1.03952	0.0432835	0.664771	-1.15353	-1.1021	-1.46276	0.0178545	-0.24017	-0.682575	-0.0178545	-3.34155
K7GQI7	Apoptosis-associated speck-like protein containing a CARD OS	0.162669	0.642065	-1.00125	-0.535704	-0.12985	0.035359	0.455727	1.06222	-1.04227	0.104339	-0.521131	-0.035359	0.4861	-0.29357	1.02712	-1.98783
I3LBQ6	KH domain-containing protein OS	-1.72032	0.380347	-1.21008	-0.148822	0.180235	0.36149	0.176648	0.526169	-1.19574	-1.01847	-1.07902	0.180716	0.148822	-0.523776	0.225194	-2.75458
A0A286ZQL9	Activating signal cointegrator 1 complex subunit 2 isoform X8 OS	-1.29686	0.227538	-0.550873	0.070905	0.114121	0.548791	0.342064	0.443329	-0.522228	-0.501578	-1.03437	0.027646	-0.027646	-0.0949522	0.299907	-2.56638
A0A287AF88	Uncharacterized protein OS	-0.161984	0.51158	-0.722144	-0.0411285	0.0411285	0.781914	0.330003	1.10654	-0.146063	-0.40554	-0.523981	0.125521	0.671714	-0.11668	0.570574	-1.84205
F1RF46	Asialoglycoprotein receptor 2 isoform d OS	-1.67809	0.12632	-1.18397	-0.52083	0.010167	0.274751	0.017722	0.221362	-0.224437	0.092864	-0.403051	-0.010167	0.532549	-0.183037	0.660873	-2.48873
F1RLM3	Histone-lysine N-methyltransferase OS	0.229313	0.506772	-0.178743	0.332044	0.269247	0.786006	0.481811	0.816274	-0.649913	-0.561639	-0.437406	-0.097497	-0.235565	-0.294718	0.097497	-2.78577
I3L7I5	Set1/Ash2 histone methyltransferase complex subunit ASH2 isoform X1 OS	-0.112542	0.175209	-0.145073	0.211636	0.0557734	0.447	0.137838	0.341763	-0.606357	-0.43769	-0.858111	-0.0557734	0.312113	-0.202117	0.320477	-2.05114
F1RJH8	Argininosuccinate lyase isoform 1 OS	-0.427964	0.466374	-0.248111	0.0888496	0.151555	0.456474	0.0469457	0.518059	-0.58723	-0.399714	-0.753462	-0.0469457	0.434227	-0.1457	0.371217	-1.73066
A0A287BDT0	Uncharacterized protein OS	-0.132973	0.643412	-0.864448	-0.198604	0.688713	1.06778	0.242574	0.870688	-0.0985565	0.0985565	-0.107534	0.206809	0.614222	-0.429013	-0.215975	-2.65516
A0A287AIE6	ATPase ASNA1 OS	-0.354393	0.3872	-0.232246	0	0.0992335	0	0.102051	0.476768	-0.360198	-0.136145	-0.198918	0.0090358	0.214385	-0.271823	0.197358	-2.07918
F6Q1M2	Asparagine synthetase [glutamine-hydrolyzing] OS	-1.15028	0.181727	-0.964458	-0.181727	0.187892	0.990405	0.678582	0.706765	-0.988588	-0.553695	-0.649379	-0.244683	0.476839	0.627331	1.19709	-2.65213
A0A286ZYD6	Aspartoacylase OS	-0.735564	0.413556	-0.928577	-0.32972	0.399319	0.603543	-0.0966376	0.367981	-0.490533	0.314611	-0.172587	0.0966376	0.642344	-0.605458	0.166957	-1.36574
F1RH12	Putative L-aspartate dehydrogenase isoform 1 OS	-0.871403	0.0889134	-0.35711	0.361734	0.406236	0.543635	0.101788	0.835903	-0.0340068	0.00611315	-0.00611315	0.250512	-0.536117	-0.750773	-0.0481588	-2.80582
A0A287AT82	TPR_REGION domain-containing protein OS	-0.170832	0.231843	0.0252966	-0.003645	-0.0168607	0.274656	0.003645	0.157973	-0.423074	-0.286993	-0.821268	0.0367127	0.315064	-0.204037	0.0842477	-1.73139
F1SUE4	Asporin isoform 1 preproprotein OS	-0.36746	1.32223	-0.616635	0.0375935	0.400998	1.34669	0.820046	1.27121	-1.41294	-1.05551	-1.37244	-0.0375935	-0.203072	0.719418	0.950484	-1.19422
A0A287BCG1	UBX domain-containing protein OS	-0.999262	0.160449	-0.860198	0.00787587	0.116215	0.537185	0.228029	0.625229	-0.309431	0.0610044	-0.352661	-0.00787587	0.165565	-0.636692	-0.200109	-2.89973
F1RPW8	Uncharacterized protein OS	-0.845183	-0.0585097	-0.58971	0.291836	0.0991911	0.542309	0.0656061	0.450963	0.101955	-0.30528	-0.501067	0.1707	0.0585097	-0.213087	-0.263774	-2.52645
A0A287A9G4	Argininosuccinate synthase OS	-0.883642	0.275262	-0.339725	-0.0306339	0.0513936	0.438851	0.244592	0.881561	-0.57476	0.0290719	-0.456655	-0.0290719	0.137379	-0.382969	0.207967	-1.6047
F1S518	Uncharacterized protein OS	0.054638	-0.019098	0.019098	0.503546	0.336221	0.756749	0.593743	0.447354	-1.31157	-1.01861	-1.69913	-0.240066	-0.282892	-0.980564	0.054732	-3.15477
F1SDL7	Uncharacterized protein OS	-0.536412	0.136115	-0.162313	0.33284	0.000897497	0.543371	-0.000897497	0.312742	-0.142359	-0.166337	-0.124633	0.149127	0.421308	-0.116825	0.246179	-2.68437
F2Z5H2	AAA domain-containing protein OS	-0.301151	0.685194	-0.579318	-0.184709	0.292151	0.293536	0.182781	0.926608	-0.76006	-0.182781	-0.74861	0.182781	0.967969	-0.367469	0.705108	-1.12427
A0A287BGV4	Bromo domain-containing protein OS	-2.04669	0.173307	-1.12422	0.0905616	-0.0148875	0.645124	0.453838	0.573263	-1.24734	-1.17527	-1.83875	-0.0621476	0.0148875	0.157619	0.627711	-2.458
F1RJE4	AAA domain-containing protein OS	-0.595767	0.846272	-0.43744	-0.172513	0.281235	0.261776	0.264572	0.818002	-1.19347	-0.595767	-0.921508	0.020132	0.84347	-0.020132	0.864816	-1.20502
A0A287BP37	Arginyl-tRNA--protein transferase 1 OS	-0.359046	0.912758	-0.302366	0.859751	-0.40242	0.173014	0.629599	1.15904	-0.752459	-0.220172	-0.742589	0.420027	1.09535	-0.173014	0.674492	-1.43649
A0A287BS39	Cyclic AMP-dependent transcription factor ATF-2 OS	-1.20561	0.278613	-0.281383	0.069946	0.161235	0.360208	0.282206	0.62645	-0.720189	-1.08036	-1.45396	-0.0334556	0.0334556	-0.0394233	0.361341	-2.4381
F1S2W1	Cyclic AMP-dependent transcription factor ATF-3 isoform X1 OS	-0.787149	-0.321857	0.0833998	-0.24037	0.562504	0.422886	0.385166	0.320439	-0.586452	-1.10169	-0.934374	-0.0833998	0.309153	0.727962	0.717566	-2.46092
A0A287AI44	BZIP domain-containing protein OS	0.0491089	0.18253	-0.710898	-0.0491089	0.082995	0.417236	0.0661509	0.233322	-0.89147	-0.391652	-0.866379	-0.314969	0.241424	-0.395237	0.247183	-2.40243
A0A287B825	Cyclic AMP-dependent transcription factor ATF-7 OS	-0.617158	0.174655	-0.187542	0.0595036	-0.0595036	0.337038	0.19534	0.39295	-0.304276	-0.277309	-0.653684	0.208118	0.0888193	-0.0656426	0.248266	-2.66296
F1SQ86	Activating transcription factor 7-interacting protein 1 isoform X2 OS	-0.344828	0.974589	0.0404235	0.503169	0.717775	0.941024	0.930698	1.16635	-1.13217	-0.936412	-1.5098	0.0413495	-0.142091	-0.745251	-0.0404235	-3.01325
D7RA34	Ubiquitin-like protein ATG12 OS	-0.08433	0.795296	-0.387138	-0.25128	0.317818	0.14094	0.631956	0.884164	-1.15381	-0.066114	-0.069739	0.02507	0.943807	-0.02507	0.671575	-2.38263
A0A287A5J3	Autophagy-related protein 16-1 isoform X1 OS	-0.332934	0.29824	-0.682318	-0.101147	0.101147	0.490886	0.146621	0.5365	-1.30643	-1.18236	-2.00994	0.179497	0.283194	-0.177547	0.832028	-2.10419
I3L979	Uncharacterized protein OS	-0.79827	0.190984	-0.514859	0.102004	0.0875909	0.491723	0.152729	0.632408	-0.992827	-0.177183	-0.182413	-0.0861417	0.750556	-0.852821	0.0861417	-1.5415
A0A287BFM0	Uncharacterized protein OS	0.0063431	0.176892	-0.0306147	-0.119698	0.0987508	0.272182	0.0327643	0.11966	-0.339285	-0.0670667	-0.780113	-0.0063431	0.0546443	-0.437039	0.323774	-2.49149
F1SLS7	Autophagy-related protein 3 OS	-0.575131	0.826213	-0.894522	-0.446646	0.340018	0.64109	0.440002	0.995391	-0.493797	-0.307456	-0.685757	0.30325	0.591126	-0.30325	0.673463	-2.04091
A0A286ZVF1	Autophagy-related protein 9 OS	-1.41849	0.395844	-0.711978	-0.071912	0.29148	0.578682	0.157657	0.712837	-0.314942	-0.491896	-0.620312	0.0704314	0.0943874	-0.0704314	0.32449	-2.14795
A0A287AWD2	GB1/RHD3-type G domain-containing protein OS	-1.78278	0.114479	-1.62176	-0.632594	0.0777485	0.250951	-0.0777485	0.146738	-0.758923	-0.12784	-0.522626	0.0999005	0.89079	0.896622	0.945273	-1.24068
A0A286ZXQ0	GB1/RHD3-type G domain-containing protein OS	-0.372822	0.307174	-0.96454	-0.555322	0.0237992	0.505669	-0.178493	-0.0237992	0.0426962	-0.0574584	-0.407917	0.0853826	0.0993353	0.279254	0.693985	-2.05128
I3L8Y8	Atrophin-1 OS	-0.425095	0.00808445	-0.224577	0.153935	0.0197309	0.462057	0.0341579	0.125921	-0.205807	-0.293164	-0.596748	-0.00808445	0.147314	-0.209202	0.213463	-2.21773
I3L7P7	Copper transport protein ATOX1 OS	-0.757222	-0.107138	-0.202691	0.202527	0.0544285	0.469076	0.172663	0.535393	0.0450405	-0.198968	-0.257785	0.272581	0.0340095	-0.508861	-0.0340095	-2.52276
A0A287B1K5	Cation-transporting ATPase OS	-1.81845	0.940382	-0.357079	0.112406	0.555135	0.514807	0.729321	0.867155	-1.3013	-1.04422	-1.31609	0.0736995	-0.0736995	-0.62057	0.138279	-3.16167
F1SAX3	Sodium/potassium-transporting ATPase subunit alpha OS	-0.849723	0.736197	-0.755358	-0.524929	0.319247	0.50566	0.422603	0.646523	-1.07594	-1.02972	-1.33228	-0.0087535	0.419037	0.0087535	0.688604	-0.261895
P05027	Sodium/potassium-transporting ATPase subunit beta-1 OS	-1.6029	0.810831	-1.12419	-0.412865	0.545449	0.728369	0.585993	1.05732	-1.16975	-1.26132	-1.38573	0.290381	1.05567	-0.290381	0.652951	-0.713831
A0A287AR12	Sodium/potassium-transporting ATPase subunit beta OS	-0.153616	-0.0650981	0.267522	0.315417	-0.302904	0.0326989	-0.016853	0.09165	-0.0559283	-0.360066	-0.210134	0.0240774	0.212934	0.183555	0.016853	-2.11025
F1SKD9	Mitochondrial inner membrane protease ATP23 OS	-0.187277	0.324928	-0.540006	-0.0272915	0.126989	0.270333	0.0191735	0.705108	-0.570527	0.174484	-0.0191735	-0.0888345	1.03563	-0.0486165	0.0519099	-0.96359
P11607	Sarcoplasmic/endoplasmic reticulum calcium ATPase 2 OS	0.228068	0.372078	-0.216495	-0.0365611	0.234695	0.496407	0.0365611	0.226739	-0.277424	-0.490418	-0.42838	-0.258688	0.436731	-0.130522	0.642109	-1.5036
A0A286ZW82	Calcium-transporting ATPase OS	-1.45089	0.511071	-0.912291	-0.176341	0.441119	0.97188	0.66853	0.878464	-0.627172	-0.557941	-0.975492	0.419492	0.176341	-0.320911	0.451793	-2.6735
F1SPZ4	Calcium-transporting ATPase OS	-1.46984	0.249236	-0.465716	-0.0358136	0.130196	0.481816	0.424036	0.381135	-0.848149	-1.17209	-1.52461	0.0358136	0.367318	-0.155376	0.47109	-1.3133
K7GRJ7	Calcium-transporting ATPase OS	-1.8308	0.495283	-1.28277	-0.146887	0.16005	0.146887	0.326915	0.641353	-1.08036	-0.961555	-1.62262	0.352368	0.381881	-0.627136	0.263686	-2.31519
M3TYK5	Calcium-transporting ATPase OS	-1.94112	0.410809	-1.00871	-0.260001	0.10815	0.592395	0.226079	0.296209	-0.304919	-0.375859	-1.25695	0.199708	0.177358	-0.10815	0.302419	-1.93624
A5GFX4	ATP synthase, H+ transporting, mitochondrial F1 complex, epsilon subunit OS	-1.84751	-0.005546	-1.16517	-0.054071	0.217983	0.902511	0.451426	1.04601	0.0658281	-0.360862	-0.822076	0.372844	0.177924	-0.706383	0.005546	-1.55904
P80021	ATP synthase subunit alpha, mitochondrial OS	-0.317685	0.619121	-0.614078	-0.13046	0.338321	0.440557	0.445423	0.706837	-1.0859	-0.694755	-0.619149	0.13046	0.738898	-0.686747	0.78761	-1.85003
K7GLT8	ATP synthase subunit beta OS	-0.169924	0.347052	-0.192426	-0.00152665	0.105934	0.27948	0.266847	0.348252	-0.435021	-0.451627	-0.636242	0.00152665	0.33015	-0.147767	0.375574	-2.13598
A0A287A9I8	ATP synthase subunit gamma OS	-1.0731	0.386334	-0.713202	-0.215591	0.134498	0.502676	0.6556	0.81257	-0.407965	-0.640138	-0.850709	0.152236	-0.134498	0.721442	0.608191	-1.2995
A0A286ZYL7	ATP synthase subunit delta, mitochondrial OS	-1.90372	0.409532	-1.22565	0.142429	0.467845	0.999325	0.750493	0.962206	-0.355277	-0.947655	-1.1682	0.741297	-0.142429	-0.264481	0.521209	-2.41829
Q29307	ATPase inhibitor, mitochondrial OS	-2.44617	0.267309	-1.50562	-0.267309	0.40531	1.08245	0.982804	1.22784	-0.757494	-1.63243	-1.53391	0.508318	-0.97295	0.437235	0.33926	-2.12603
F1RFD4	Uncharacterized protein OS	0.0924582	0.590894	-0.289958	-0.627611	0.119203	-0.0575466	0.0575466	0.545604	-1.22872	0.203545	-0.315598	-0.0980456	0.802785	-0.800627	0.213232	-1.02953
Q9MYT8	ATP synthase subunit e, mitochondrial OS	-0.735423	0.260644	-0.852647	-0.0259477	0.287952	0.673383	0.623214	0.657518	-0.555929	-0.343479	-0.477197	0.316016	0.0259477	-0.841331	0.125895	-2.27909
Q95339	ATP synthase subunit f, mitochondrial OS	-0.255627	0.0581347	-0.255627	0.005931	0.0147638	0.234848	0.0919163	0.174378	-0.422458	0.0132954	-0.373614	-0.0299514	0.377497	-0.306064	-0.005931	-1.70228
F1S9V7	Uncharacterized protein OS	-0.0614468	0.332096	0.152178	-0.237625	0.161865	0.274581	0.402661	0.165997	-0.5834	-0.102273	-0.644801	-0.00771485	-0.208806	0.00771485	0.0766417	-0.903018
A0A286ZYM6	Uncharacterized protein OS	-2.30608	0.307258	-1.18773	-0.349713	0.0944036	0.42452	0.423393	0.685488	-1.02509	-1.21905	-2.13698	-0.0944036	0.453508	0.919248	0.748023	-0.594754
A0A287B0C3	ATP synthase subunit d, mitochondrial OS	-0.976585	0.33796	-1.16207	-0.33796	0.375159	0.692884	0.579071	0.931867	-0.815235	-0.361807	-0.487338	0.401154	0.380395	-0.580924	0.43552	-2.48021
P13618	ATP synthase-coupling factor 6, mitochondrial OS	-0.773135	0.519825	-0.799715	-0.633771	0.401659	0.73572	0.734691	1.25008	-0.069323	-0.074723	0.069323	0.620157	-0.372066	-0.860595	0.534086	-3.00433
A0A2C9F3A3	ATP synthase subunit O, mitochondrial OS	-0.299596	0.578351	-0.878193	-0.247356	0.421968	0.701468	0.283948	1.11624	-0.641342	-0.00950851	-0.210882	0.00950851	0.599045	-0.288994	0.532474	-2.34718
K9IWA3	V-type proton ATPase subunit S1 OS	0.0645473	0.383461	-0.191876	-0.191876	0.681284	0.526988	0.16629	0.117767	-0.333523	-0.228309	-0.521922	-0.0645473	0.155019	-0.215453	0.551909	-2.44702
A0A287AJK1	Renin receptor OS	-0.353452	0.326744	-0.338656	0.0107695	0.437725	0.549893	0.21942	0.466897	-0.315704	-0.162667	-0.489256	-0.0008315	0.0008315	-0.0396205	0.592427	-2.64178
F1S1D6	V-type proton ATPase subunit a OS	0.0069195	0.581515	-0.579765	-0.434761	0.119481	0.312921	0.1603	0.800933	-1.32018	-0.0156365	-0.240363	-0.0069195	1.26766	-0.812102	0.746294	-1.20006
F2Z5H6	V-type proton ATPase subunit OS	-0.446192	0.321037	-0.337378	-0.0853458	0.22271	0.374713	0.293431	1.1644	-0.28293	-0.470777	0.100596	0.0853458	-0.12382	-0.944081	0.132107	-1.88581
F1SP93	V-type proton ATPase catalytic subunit A OS	-0.302782	0.602544	-0.361498	-0.130255	0.130255	0.413146	0.319345	0.834333	-0.937611	-0.194043	-0.650513	0.202598	0.901536	-0.215946	0.715218	-1.25871
F1SLE5	Vacuolar proton pump subunit B OS	-0.557523	0.579504	-0.394584	-0.194373	0.0905085	0.493823	0.754965	1.17237	-0.58124	-0.0905085	-0.130773	0.269117	0.314092	-0.12883	0.710077	-2.31732
F1RMZ8	Vacuolar proton pump subunit B OS	-1.31125	0.305269	-1.03469	-0.23194	-0.0042853	0.458659	0.300637	0.901745	-0.914044	-0.935739	-0.99714	0.0042853	0.0352818	0.14915	0.481346	-1.82026
F1S0R4	V-type proton ATPase subunit C OS	-0.221226	0.508862	-0.233383	-0.0060585	0.107546	0.405499	0.456846	0.748186	-0.602364	-0.146519	-0.33016	0.0060585	0.895027	-0.112438	0.526995	-1.02354
F1SAA2	V-type proton ATPase subunit C OS	-0.849564	0.305497	-0.614301	-0.346751	-0.0598084	0.221839	0.337413	0.584972	-1.46004	-1.02182	-1.0369	0.0598084	0.254401	0.153095	1.28321	-2.49709
A0A286ZJL5	V-type proton ATPase subunit D OS	-1.27194	0.195731	-0.363835	0.0752086	-0.225451	0.154414	0.121592	0.522382	-0.457848	-0.562857	-0.838842	-0.0752086	0.565728	0.45042	0.436032	-1.78081
A0A287AIQ8	V-type proton ATPase subunit E 1 OS	-0.933528	0.0750516	-0.4922	0.101887	0.104683	0.504628	0.384379	0.590907	-0.33619	-0.456731	-0.52208	0.295406	-0.0750516	-0.289557	0.178194	-2.70827
F1SMN6	V-type proton ATPase subunit F OS	-0.500381	0.175125	-0.504946	-0.166197	0.25155	0.62401	0.401792	0.729805	-0.732301	-0.171631	-0.128723	0.395682	0.128723	-0.812089	0.317679	-2.33071
A0A287AKZ9	V-type proton ATPase subunit G OS	-1.72245	-0.0051869	-1.0973	0.0051869	0.149787	0.811064	0.417268	0.878716	0.0154867	-0.252836	-0.479945	0.279986	-0.132612	-0.439188	0.118732	-2.78747
Q9TSV6	V-type proton ATPase subunit G 2 OS	-1.32225	1.01146	-0.656789	-0.0557665	0.993757	1.18685	0.882726	1.31402	-1.01607	-0.637209	-1.09754	0.230382	0.0557665	-0.473129	0.257052	-2.70058
A0A287BRQ6	V-type proton ATPase subunit G OS	-1.05242	0.15043	-0.538889	0.0419995	0.254097	0.826797	0.644266	0.758916	-0.23415	-0.191314	-0.0419995	0.580526	-0.0734775	-0.286472	0.329576	-2.53645
F1RSG6	V-type proton ATPase subunit H OS	-0.794502	0.267744	-0.521577	-0.232274	-0.0101435	0.498445	0.347178	0.561135	-0.440983	-0.718068	-0.715503	0.0101435	0.121921	0.42363	0.656291	-1.9456
A0A287ANF8	Uncharacterized protein OS	-1.39097	0.437466	-1.03961	-0.174912	0.378573	0.957235	0.467698	0.913162	-1.01773	-1.35918	-1.4865	-0.0022985	0.114123	0.0022985	0.590826	-1.76507
F1RPI9	Uncharacterized protein OS	-0.992832	0.683664	-0.674689	-0.117791	0.385921	0.710996	0.538651	1.06883	-0.854756	-0.782188	-1.28129	0.117791	0.360256	-0.53054	0.408755	-2.43972
F1RUJ3	Ataxin-1 OS	-0.13927	0.232394	-0.21142	0.304386	0.171556	0.645164	0.337273	0.560009	-0.127588	-0.330719	-0.289226	0.0867082	0.0737564	-0.119301	-0.0737564	-2.80168
I3LCM4	Ataxin-10 isoform 1 OS	-1.5927	-0.0144885	-1.28266	-0.58259	-0.0650115	0.153054	0.0144885	0.253419	0.409414	0.157211	-0.0804805	0.314352	0.628816	-0.248449	0.668959	-1.16721
A0A287AZE0	AXH domain-containing protein OS	-0.203638	0.226417	-0.616501	0.0852754	0.0691559	0.419971	0.127401	0.393243	-0.61433	-0.139791	-0.213463	0.0446336	0.236076	-0.901428	-0.0446336	-2.59066
F1RMZ0	LsmAD domain-containing protein OS	-1.66403	0.129018	-0.776623	-0.0935823	0.132764	0.49478	0.277391	0.546242	-0.565651	-1.09504	-1.33605	0.0935823	-0.144052	0.111409	0.117723	-2.38519
A0A286ZI01	LsmAD domain-containing protein OS	-2.62291	0.26106	-0.950319	-0.137489	0.235969	0.676098	0.443304	0.606019	-0.694617	-1.03213	-2.28879	0.385801	0.129703	-0.129703	0.362805	-2.43465
A0A287AV57	LsmAD domain-containing protein OS	-1.125	0.25476	-0.44086	0.11763	0.176689	0.562164	0.382262	0.747112	-0.703491	-0.788233	-0.867377	0.10248	-0.10248	-0.129869	0.211767	-2.53035
Q06AV3	Ataxin-3 reference isoform OS	-1.15844	0.294979	-0.198274	-0.0422372	0.0422372	0.396884	0.120743	0.176629	-0.429038	-0.595649	-1.25933	0.193967	0.186562	-0.444284	0.198882	-2.94551
A0A287BCM8	SCA7 domain-containing protein OS	-3.42914	0.633594	-1.87115	-0.58784	0.42219	1.36441	0.767255	1.47132	-0.610383	-0.665967	-0.978481	-0.0171137	0.0171137	0.134287	0.452957	-2.28437
A0A287AZQ4	Uncharacterized protein OS	-1.72028	1.02923	0.0771425	0.446143	0.60291	0.703788	0.844595	0.823142	-1.20193	-1.23201	-1.35369	0.129145	-0.0771425	-0.810607	-0.117894	-3.22271
F1RN10	Methylglutaconyl-CoA hydratase, mitochondrial isoform 1 OS	-0.0913314	0.510466	-0.378957	-0.141292	0.324976	0.427807	0.171139	0.722782	-0.837356	-0.171404	-0.663649	0.0913314	0.529311	-0.592421	0.367485	-1.63622
F1SNV5	Ancient ubiquitous protein 1 OS	-0.567495	0.437693	-0.39382	0.0474795	-0.0096475	0.27181	0.0096475	0.318975	-0.925615	-0.631271	-0.945745	0.0474795	0.734012	-0.172088	0.800983	-1.49897
A0A287B3R8	DUF1713 domain-containing protein OS	-1.59224	0.491644	-0.0403402	0.210434	0.244817	0.425159	0.406588	0.936384	0.377084	-0.6988	-0.0371593	0.0371593	-0.171964	-0.510561	-0.269383	-3.45431
A0A287AHU0	Uncharacterized protein OS	-1.3925	0.13357	-0.587894	0.00219815	0.273501	0.540571	0.25028	0.722979	-0.0363551	-0.688217	-0.755893	0.0943013	-0.00219815	-0.301194	0.221662	-2.96596
I3LI80	Advillin isoform X1 OS	-0.75881	0.27546	0.06588	0.217413	-0.022954	-0.140932	-0.142741	0.331262	-0.459249	0.184607	-0.644186	-0.151821	1.18172	0.022954	0.431927	-0.999813
I3LIX7	Axin-1 isoform b OS	-0.47224	0.231654	-0.0592476	0.234161	0.0198853	0.375984	0.133014	0.451176	-0.620615	-0.648052	-0.59369	-0.0198853	0.114084	-0.266879	0.348481	-2.82724
A0A287BJ64	MHC_I-like_Ag-recog domain-containing protein OS	0.305048	0.252939	-0.110451	-0.946692	0.686854	0.497692	0.255804	-0.0794245	0.0794245	-0.814582	-1.01412	-0.344265	-0.436074	0.598197	1.55465	-2.29521
F1RNP2	Ig-like domain-containing protein OS	-0.209831	0.355979	-0.721876	-0.969276	0.50971	0.475848	0.162764	0.078244	0.147481	-0.078244	-0.866416	-0.23966	-0.23966	0.473398	1.30523	-1.99279
I3LKX7	5-azacytidine-induced protein 2 isoform X1 OS	-1.07664	0.556347	-0.732589	0.0498198	0.365608	0.831312	0.486933	0.989497	-1.10234	-1.11537	-1.45706	0.19407	-0.0498198	-0.247162	0.326405	-2.26338
P80015	Azurocidin OS	-0.890458	0.0298645	-1.37021	-1.11233	-0.720537	0.440297	0.305935	0.217696	-0.0298645	0.693446	-0.862267	-0.0885405	0.54109	0.991752	1.05883	-1.54843
A0A287B7B9	Beta-2-microglobulin OS	-1.57448	0.88906	-1.36001	-0.799811	0.674242	0.677411	0.386028	0.986832	-1.00467	-0.753543	-1.83249	-0.0337535	0.282982	0.0337535	0.887236	-1.482
I3LK23	Galactosylgalactosylxylosylprotein 3-beta-glucuronosyltransferase OS	-0.909851	0.242747	-0.545627	-0.0539279	0.0539279	0.579614	0.231981	0.719143	-0.621701	-0.50004	-0.862931	-0.0605309	0.211575	0.314668	0.623526	-1.36111
F1SIW5	Hexosyltransferase OS	0.300469	1.06514	-0.036256	0.036256	0.719182	0.563503	0.611758	0.819158	-1.47808	-1.07368	-1.48878	-0.065178	-0.183108	-1.06708	0.116843	-3.22036
A0A287BG16	Beta-1,4-galactosyltransferase 1 OS	-0.0054735	0.635428	-0.73305	-0.772579	0.170196	0.668275	0.0054735	0.127885	-0.159397	0.256514	-0.116379	-0.2164	0.251267	-0.152428	0.674168	-2.09451
F1S1A6	Uncharacterized protein OS	-0.811512	0.200581	-0.457875	0.0509838	-0.00346375	0.240955	-0.0343096	0.218533	-0.267608	0.0496478	-0.416652	-0.00069185	0.282508	0.00069185	0.292711	-2.29112
F1RUS9	Beta-1,4-glucuronyltransferase 1 OS	0.242978	-0.423284	-0.294001	-0.19363	0.0489209	0.429279	0.275949	0.0865767	-0.684751	-0.531104	-0.684751	-0.0131557	0.0131557	0.417288	0.584535	-1.57616
A0A287BIY2	Uncharacterized protein OS	-2.76867	-0.049085	-1.25945	-0.650916	-0.090642	0.094877	0.081869	0.323265	-0.647529	-0.012256	0.017455	0.270654	0.247242	0.012256	0.699414	-2.72066
F1RH86	B9 domain-containing protein 2 isoform X1 OS	-1.95934	0.031432	-1.48867	-0.497485	-0.016376	0.321592	-0.062981	0.301781	-0.235163	-0.070974	0.016376	0.1123	0.958421	0.095327	0.789317	-2.0961
A0A286ZQV9	Uncharacterized protein OS	-1.21996	0.635333	-0.917055	-0.201574	0.497148	0.985608	0.498397	1.1167	-0.403816	-0.157611	-0.3511	0.157611	0.798427	-0.185432	0.392154	-1.9071
A0A286ZV36	Uncharacterized protein OS	-0.618692	0.19029	-0.32484	0.300454	0.154732	0.340862	-0.530291	0.171962	-0.618692	-0.0934464	-0.424907	0.0934464	0.618279	-0.286317	0.246424	-1.58046
F1SHM8	Transcription regulator protein BACH1 OS	-1.06286	0.0711393	-1.14791	0.0960133	0.114392	0.603293	0.183331	0.131337	-0.653336	-0.450621	-0.831837	-0.0711393	0.29389	-0.336391	0.364177	-2.21363
A0A287AEF3	Uncharacterized protein OS	-0.265482	-0.00215858	-0.239765	0.22906	0.0750092	0.598571	0.231513	0.332111	-0.455658	-0.424421	-0.547321	0.00215858	0.0953579	-0.347333	0.152148	-3.08674
F1RQ09	Uncharacterized protein OS	-0.899952	0.565879	-1.13831	-0.116913	0.331107	0.489235	0.463511	0.487033	-0.882052	-0.549152	-0.997712	0.116913	0.163011	-0.394932	0.310385	-2.68962
F1SE85	BAG family molecular chaperone regulator 1 OS	-0.439539	0.308227	-0.871352	-0.340838	0.383221	0.632636	0.226495	0.993112	-0.217742	-0.0146315	-0.0115295	0.0742003	0.304498	-1.03181	0.0115295	-2.8518
A0A287AV76	BAG domain-containing protein OS	-0.413931	0.467682	-0.590906	-0.260353	0.275909	0.544977	0.56567	0.809747	-1.02044	-0.473669	-0.905217	0.220442	0.333351	-0.220442	0.901229	-2.18353
F1S415	BAG domain-containing protein OS	-1.00109	0.203034	-0.758854	-0.40978	0.413159	0.886613	0.613237	0.710557	-1.06608	-1.11339	-1.0235	-0.0912304	0.0912304	0.415542	0.805363	-2.06608
A0A287AP23	BAG family molecular chaperone regulator 4 isoform 1 OS	-1.67474	0.342391	-0.796423	-0.10043	0.305227	0.596444	0.416458	0.858012	-0.688066	-0.810924	-1.32341	0.377344	0.10043	-0.230826	0.406465	-2.34435
A0A287BRD8	BCL2 associated athanogene 5 OS	0.0565904	0.226193	-0.10285	0.112113	-0.0723754	0.375613	-0.0565904	0.398697	-0.376949	-0.315549	-0.54516	0.184297	0.349787	-0.214011	0.333108	-1.94051
A0A2C9F389	Large proline-rich protein BAG6 OS	-0.276389	0.0714129	-0.407633	0.0846729	0.0349897	0.531692	0.0780589	0.217008	-0.513549	-0.499629	-1.00378	0.110834	-0.0349897	-0.413215	0.0458781	-2.64308
F1SSR6	Bromo adjacent homology domain-containing 1 protein isoform X1 OS	-1.29528	0.248515	-0.771877	-0.12987	0.272362	0.901052	0.395193	0.840211	-1.18521	-1.18863	-1.16147	0.282286	-0.353634	0.12987	0.354616	-2.87288
A0A287BKX8	Uncharacterized protein OS	-0.70787	0.0652857	-0.492785	-0.0113601	0.0113601	0.396143	0.143217	0.396143	-0.303892	-0.399926	-0.494785	0.148351	0.232947	-0.265833	0.104117	-2.14944
A0A287BRR9	Uncharacterized protein OS	-2.76453	0.327074	-0.947128	-0.458842	0.445189	0.449544	0.725746	1.15241	-1.54503	-2.1235	-3.05404	-0.0341442	0.0341442	0.227877	0.481797	-2.01751
F1RFK7	Uncharacterized protein OS	-1.01952	0.260934	-1.1037	-0.0475311	0.0475311	0.446801	0.233014	0.693894	-0.78549	-0.664103	-1.04307	0.229332	0.0778758	-0.147705	0.365271	-2.33853
F1SKP3	Brain-specific angiogenesis inhibitor 1-associated protein 2-like protein 2 isoform X6 OS	-1.03553	0.302502	0.302502	0.203051	0.31667	0.317844	-0.155892	-0.00731595	-0.396603	-0.653104	-0.991231	0.00731595	0.104423	-0.182213	0.341132	-2.5791
F1RZR2	Bcl-2 homologous antagonist/killer OS	-1.61054	1.46145	-0.983831	0.248216	0.822144	1.39506	1.35543	1.41355	-0.859671	-0.839721	-0.924761	0.196619	-0.196619	-0.724121	0.602363	-2.73049
F1RU33	Uncharacterized protein OS	-0.102537	0.13619	-0.478612	-0.0294955	0.229115	0.677682	0.184115	0.467245	-0.344813	0.502038	-0.0064915	0.231881	-0.0311535	-0.87121	0.0064915	-1.6875
I3LS23	BEN domain-containing protein OS	-0.214817	0.41545	0.0344795	-0.0344795	0.239695	0.233843	0.0411975	0.25133	-0.819927	-0.772038	-0.357732	-0.129355	0.990032	-0.59493	0.631178	-2.13882
A0A287A7E1	Uncharacterized protein OS	0.0587605	0.149037	-0.255103	0.145386	-0.344678	0.364293	-0.00202155	0.241994	0.163549	-0.255103	-0.576227	-0.243888	0.0114116	-0.84248	0.00202155	-3.43471
A0A287ALA0	Uncharacterized protein OS	-3.39181	0.881576	-1.21718	-0.418575	1.52705	1.55964	0.530558	0.900107	-2.45691	-1.98742	-2.06988	1.37326	-0.697907	0.418575	1.26388	-2.77883
A5D9L4	G patch domain and ankyrin repeat-containing protein 1 OS	-0.55851	0.211641	-0.552149	0.00432813	0.0648894	0.425465	0.158343	0.171213	-0.463941	-0.219264	-0.597272	-0.00432813	0.250968	-0.277528	0.32078	-2.65289
F1RIQ4	Uncharacterized protein OS	-0.11814	0.629332	0.0632779	-0.0802969	0.12127	0.389707	-0.0632779	0.4009	-0.825587	-0.380216	-0.309188	0.234455	0.842176	-0.193571	0.77924	-1.27139
F1SHI5	Uncharacterized protein OS	-2.05444	0.105224	-1.23631	-0.508281	-0.117039	0.134458	0.00636999	0.217618	-0.389314	0.447095	-0.640853	-0.00636999	0.658364	0.00947399	0.704517	-2.84413
I3LCE6	Tyrosine-protein kinase BAZ1B isoform X1 OS	-0.434137	0.503801	-0.329549	0.0667031	0.0528385	0.663373	0.412654	0.769853	-0.772429	-0.224508	-1.06315	-0.0088315	0.0088315	-0.360136	0.771736	-2.88061
F1SLA2	Uncharacterized protein OS	0.129092	0.193397	-0.109722	0.384276	0.0073383	0.720749	0.245085	0.282972	-0.768602	-0.773611	-1.24058	-0.0073383	-0.122447	-0.128852	0.343216	-2.78115
A0A287BKD3	Uncharacterized protein OS	0.116029	0.0878413	0.118565	0.298168	0.0735373	0.52439	0.141186	0.33461	-0.463235	-0.391131	-0.571463	-0.150816	-0.156936	-0.561281	-0.0735373	-2.92646
F1RM01	Bcl-2-binding component 3 isoform 4 OS	-0.559979	-0.027516	-0.534845	-0.307123	0.203615	0.176479	0.188603	0.211063	-0.422245	-0.039839	-0.440801	0.613041	0.88206	0.027516	0.758395	-1.86677
F1S3H2	DUF4515 domain-containing protein OS	0.295173	1.22067	-0.51021	-0.450765	0.099368	0.025177	0.071991	1.14212	-2.07327	-0.809563	-1.13573	-0.025177	1.87592	-0.333863	1.51441	-0.552193
F1SGL4	Uncharacterized protein OS	-0.837549	0.218778	-0.99848	-0.683143	0.096863	0.545067	0.19416	1.08704	-0.587935	0.0470854	-0.355944	-0.0470854	0.599363	-0.340717	0.188924	-1.56122
F1SL36	HMG box domain-containing protein OS	-0.372478	0.475093	0.0281176	0.269461	0.258368	0.574841	0.298632	0.754888	-0.898317	-1.00121	-1.14435	-0.0281176	-0.316116	-0.202766	0.183455	-3.12163
I3L9I6	Uncharacterized protein OS	-0.336864	0.683712	-0.62659	-0.0578012	0.385423	0.743733	0.0578012	0.474714	-0.595563	-0.22671	-0.908077	0.196532	0.575674	-0.61937	0.112305	-1.66077
I3LRE0	B-cell receptor-associated protein 29 isoform b OS	-0.512719	0.34736	0.0673346	-0.210667	0.133236	0.12516	0.0375289	0.249229	-1.45307	-1.54028	-1.1621	-0.0375289	0.397388	-0.124708	0.670445	-1.46928
F1S2A8	B-cell receptor-associated protein 31 isoform b OS	-2.37029	0.973248	-1.02496	-0.332238	0.585949	1.03107	1.07171	1.12418	-1.72317	-1.83768	-2.31685	0.332238	-0.428149	0.431866	1.06753	-1.17142
A0A286ZKG5	Breast cancer anti-estrogen resistance protein 1 isoform 6 OS	-0.588627	0.314879	-0.22939	0.296279	0.222016	0.77061	0.399803	0.752531	-0.563497	-0.558974	-0.713739	0.163013	0.0222208	-0.398866	-0.0222208	-2.64983
A0A287BI52	Uncharacterized protein OS	-1.78702	0.17502	-1.21063	-0.531065	-0.0481355	0.324332	0.0481355	0.202705	-0.55885	-0.250834	-0.581174	0.313856	0.575881	0.39615	0.783424	-1.46505
I6L631	Pre-mRNA-splicing factor SPF27 OS	-0.374618	0.226069	-0.295783	0.0160053	0.212978	0.483227	0.302219	0.463464	-0.587162	-0.420804	-0.580309	0.174326	-0.0160053	-0.280891	0.292295	-2.25702
A0A287BDP6	Branched-chain-amino-acid aminotransferase OS	-0.0370005	0.244457	-0.683286	-0.458527	0.229855	0.546196	0.0370005	0.72135	-0.634377	-0.170097	-0.27865	0.356241	0.836666	-0.225363	0.87095	-1.30605
A0A287BER5	Branched-chain-amino-acid aminotransferase OS	-1.49887	0.24029	-1.06001	-0.319348	0.107978	0.477068	0.301259	0.451467	-0.24132	-0.16948	-0.107978	0.490047	0.544098	-0.385443	0.980709	-1.91533
A0A287BH26	BRCA2 and CDKN1A-interacting protein OS	0.498434	-0.0406865	0.0406865	0.706927	-0.391852	0.840567	0.344659	0.315735	-0.562914	0.192353	-0.725185	-0.0514135	0.668222	-1.19467	-0.145958	-2.50279
A0A287ACH4	2-oxoisovalerate dehydrogenase subunit alpha OS	-0.762334	0.370338	-0.290325	-0.0915454	0.341238	0.402247	0.201852	0.603881	-0.652895	-0.785255	-0.674129	0.0915454	0.236402	-0.259685	0.370338	-2.21232
F1RQL3	Transket_pyr domain-containing protein OS	-0.381346	0.231382	-0.481806	0.020694	0.442245	0.549073	-0.020694	1.53143	-0.833514	0.318928	0.603479	-0.222244	0.411457	-1.45887	-0.100097	-1.59728
F1RIR7	Protein-serine/threonine kinase OS	-0.283201	0.00448505	-0.275942	0.213616	0.0266695	0.0828013	-0.0470993	0.808429	-0.357872	-0.30151	0.00597465	-0.00448505	0.0514062	-0.66408	0.255547	-2.58346
A7XP20	B-cell CLL/lymphoma 10 OS	-0.873329	0.237433	-0.667266	0.0747438	0.185216	0.685162	0.518572	0.900753	-0.404653	-0.38167	-0.419472	0.295625	-0.0747438	-0.260464	0.08528	-2.60545
F1SAQ5	Uncharacterized protein OS	-2.25633	-0.02212	-1.46978	-0.602904	-0.050386	0.279339	-0.022437	0.370054	0.085887	0.02212	-0.397941	0.382646	0.234688	0.06332	0.803207	-2.13118
O77737	Bcl-2-like protein 1 OS	0.196054	0.172742	-0.439236	0.211388	-0.298652	0.535603	0.339036	0.0301378	-0.617416	0.0286958	-0.642467	-0.29143	-0.0286958	-1.0453	0.326181	-3.11691
F1SU81	Bcl-2-like protein 11 OS	0.0618898	0.485428	-0.246021	0.585774	0.561859	0.839497	0.496441	0.815953	-0.407025	-0.0781369	-0.0618898	-0.186687	0.0883351	-0.286977	-0.177906	-2.42146
F1RHX9	Uncharacterized protein OS	-0.0269265	0.126548	-1.12379	-0.468073	0.0575415	0.282636	0.0384835	0.604565	-0.726028	0.0269265	0.204993	-0.20625	0.104725	-1.17329	-0.395436	-3.10106
A0A287AZD8	Uncharacterized protein OS	-0.909764	0.413844	-0.37516	-0.109228	0.0789876	0.329735	0.307015	0.451405	-0.699024	-0.708739	-1.20739	0.135734	0.130295	-0.0789876	0.634477	-2.63279
F1SQ67	Uncharacterized protein OS	-2.15446	0.0107825	-1.47383	-0.231886	-0.0107825	0.519409	0.265092	0.318389	-0.0486805	0.674343	-0.560053	0.217073	0.409081	-0.384964	1.36687	-1.89953
A0A287B2U5	Bcl-2-like protein 15 OS	-1.8928	0.155333	-0.990961	-0.531657	0.0979615	0.159084	0.110118	0.168554	-2.27874	-0.00381149	-0.572622	0.00381149	0.787898	-0.59836	1.03577	-6.24222
F1RNS0	Uncharacterized protein OS	-1.49551	0.0731969	-0.161509	0.247505	0.197137	0.586952	0.113498	0.26192	-0.0504775	-0.395974	-0.890482	0.0443007	0.040125	-0.267931	-0.040125	-3.0211
F1RJN5	Uncharacterized protein OS	-0.920583	0.55874	0.0251075	0.721282	0.454372	0.988675	0.739388	0.879649	-1.20609	-1.18826	-1.32858	-0.0838145	-0.0251075	-1.07624	0.1463	-3.24397
F1RG97	Uncharacterized protein OS	-0.968345	0.0138858	-0.523061	0.0138858	-0.0138858	0.369256	0.173844	0.289699	-0.744789	-0.873708	-1.20393	0.0152605	-0.327426	0.0731641	0.264489	-2.99855
F1SDC1	B-cell CLL/lymphoma 9 protein OS	-1.36201	0.398233	-0.629736	0.00836575	0.40054	0.795269	0.537834	0.739877	-0.629736	-0.883855	-0.8923	0.13566	-0.00836575	-0.195992	0.311419	-2.52316
A0A287BRW5	BCL9 domain-containing protein OS	-1.17472	0.225456	-0.732906	-0.0862667	0.124732	0.541484	0.356311	0.660832	-0.522646	-0.718058	-0.752944	0.0673246	0.175973	-0.0673246	0.323199	-2.52911
A0A287BLS0	Uncharacterized protein OS	-0.903979	0.255801	-0.435361	0.117948	0.207293	0.518836	0.208495	0.685309	-1.2924	-1.28561	-1.35855	-0.117948	0.316183	-0.691648	0.208495	-3.22591
A0A287BRF0	BCLAF1 and THRAP3 family member 3 isoform X1 OS	-2.00171	0.0477965	-1.65072	-0.673499	-0.00982049	0.0805695	-0.0713565	0.113667	0.0582775	-0.0940905	-0.733958	0.336838	0.168943	0.00982049	0.512622	-2.24407
F1RXQ4	ANK_REP_REGION domain-containing protein OS	-0.39234	0.420482	-0.479677	-0.061962	0.236996	0.479008	0.19195	0.379708	-1.14283	-1.09607	-1.19114	0.262852	0.014604	-0.014604	0.706119	-2.39033
F1RTH5	ANK_REP_REGION domain-containing protein OS	-0.804445	0.495494	-0.430604	0.148734	0.132361	0.595358	0.441311	0.538186	-0.965909	-0.668045	-0.551549	-0.0860261	0.0860261	-0.603339	0.216019	-2.31383
A0A287AIC4	Uncharacterized protein OS	-1.1211	0.257403	-0.4264	-0.0150428	0.0914774	0.472751	0.232011	0.4031	-0.517429	-0.549094	-1.10337	0.110603	0.0785844	-0.404513	0.0150428	-2.73006
A0A287AKM3	BCS1-like OS	-0.890517	0.093609	-0.368434	0.12278	0.220469	0.441093	0.186334	0.706538	-0.801055	-0.305555	-0.193444	-0.093609	0.20464	-0.435951	0.144277	-2.25309
F1SQX8	D-beta-hydroxybutyrate dehydrogenase, mitochondrial OS	-0.625461	-0.0888434	-0.238162	0.140211	0.311206	0.438568	-0.0257651	0.559712	-0.231029	0.0257651	-0.0696294	0.0826923	0.155261	-0.623124	0.11244	-1.69001
I3LHC8	3-hydroxybutyrate dehydrogenase type 2 isoform X2 OS	-1.07073	0.72649	-0.314791	0	0.294396	0.656661	0.597812	0.948592	-0.247296	-0.30644	-0.679756	0.318895	0	-0.152564	0.618792	-1.18091
F1SK28	SANT domain-containing protein OS	-0.31165	0.254469	-0.1212	-0.0346426	0.394449	0.373862	0.169005	0.667134	-1.56419	-1.56002	-2.20023	0.0346426	0.120399	-0.385465	0.314832	-2.5517
F1S1F6	Beclin-1 OS	-1.50266	0.105919	-1.17785	-0.34549	0.250021	0.463662	0.203662	0.562453	-0.893595	-0.965744	-0.703395	0.490323	1.27242	-0.105919	1.21737	-1.40984
A0A287B0B0	BEN domain-containing protein 3 OS	-0.119108	0.22093	0.225422	0.299721	0.595282	0.677359	0.394516	0.490946	-1.45472	-1.24452	-1.40926	-0.09157	-0.329481	-0.930259	0.09157	-3.04811
A0A287BGI0	BEN domain-containing protein OS	-0.871086	1.08336	-1.07139	0.316539	0.860142	1.29629	0.891976	1.13272	-1.04748	-0.835835	-1.65569	0.113799	-0.0738715	-0.705436	0.0738715	-2.97072
A0A287BJU8	BEN domain-containing protein 7 isoform X3 OS	-0.409471	0.235411	-0.340115	0.134793	0.260437	0.551522	0.156287	0.640951	-0.0193163	-0.215839	-0.2332	0.136146	0.0193163	-0.327009	-0.132035	-3.00433
F1RGD1	BET1-like protein isoform 1 OS	-1.09877	0.915727	-0.753715	-0.212429	0.202609	0.556116	0.390812	1.00234	-0.933715	-0.202609	-0.588578	0.419076	0.419076	-0.785615	0.473995	-2.92077
I3LIH1	Uncharacterized protein OS	-1.69103	-0.0129615	-1.40787	-0.736528	-0.0765125	0.287997	0.0469785	0.123969	0.200332	0.535761	0.0129615	0.478444	-0.271289	-0.368536	0.103106	-2.34811
F1S2B6	Biglycan OS	0.170978	1.09458	-1.0867	-0.514622	0.156153	0.202804	-0.119125	0.754152	-0.95504	0.0332059	-0.33443	-0.0332059	0.346256	-0.878117	0.0767953	-2.07394
A0A287B7J3	Class A basic helix-loop-helix protein 15 OS	1.55704	1.84949	-0.614599	0.004191	0.075933	0.269175	0.355573	0.313021	-0.004191	0.108956	-0.658913	-0.561673	-0.505851	-0.938451	-0.125144	-3.04858
A0A287BEM0	Class E basic helix-loop-helix protein 40 OS	-0.372894	-0.0705411	1.0092	-0.304543	0.0819346	0.107246	-0.216426	0.0705411	0.353926	-0.611253	-0.524465	0.409243	-0.0943881	0.38185	0.205573	-2.40832
E7D6R2	Betaine homocysteine methyltransferase OS	-1.38825	0.151155	-1.41846	-0.803283	-0.0499649	0.484864	0.112055	0.427627	-0.315366	-0.463033	-1.16053	0.0499649	0.359148	0.31965	0.374649	-1.55864
A0A287ABJ0	Hcy-binding domain-containing protein OS	-0.705908	0.0433489	-0.0433489	0.251023	0.119337	0.413717	0.220227	0.513174	-0.308335	-0.128681	-0.422023	-0.0547669	0.454556	-0.133862	0.209359	-1.62831
A0A287A174	Protein bicaudal C homolog 1 OS	-0.581042	0.142287	-0.310365	-0.0278038	0.0278038	0.472676	0.128965	0.429863	-0.563633	-0.529434	-0.64826	0.305122	0.209642	-0.256926	0.202029	-2.65055
A0A287AJT8	Protein bicaudal D homolog 2 isoform 1 OS	-0.415697	0.824195	-0.93338	-0.284138	0.314	0.543868	0.357069	0.749656	-0.79493	-0.442527	-0.75464	0.266597	1.14407	-0.266597	1.01646	-1.7793
I3LLE2	GLTSCR1 domain-containing protein OS	-0.238206	0.365357	-0.0851496	0.427528	0.201628	0.426421	0.251227	0.419763	-0.786774	-0.961196	-0.955416	0.147578	-0.261204	-0.0632186	0.0632186	-2.67328
F1RU59	GLTSCR1 domain-containing protein OS	-0.0286	-0.001573	0.149327	0.001573	0.0988019	0.402397	-0.041496	0.307699	-0.094263	-0.133418	-0.334966	0.0295874	0.0372736	-0.406149	0.0388059	-2.85209
A0A287AYM3	BH3-interacting domain death agonist OS	-0.642718	0.432302	-0.717076	-0.228247	0.23812	0.282924	0.304228	0.855112	-0.712315	-0.243622	-0.315816	0.307748	0.228247	-0.510784	0.484039	-2.35795
A0A287AVP0	Uncharacterized protein OS	-0.841023	0.0576939	-0.399936	-0.02184	0.104153	0.363797	0.0939569	0.578287	-0.563795	-0.699081	-0.76947	0.023184	0.02184	-0.653277	0.0285469	-2.64471
A0A287AMG7	Uncharacterized protein OS	-2.54388	-0.389218	-1.19487	1.0271	1.45802	3.10936	1.33851	0.963082	1.54805	0.00520849	-0.200838	0.992175	-1.28084	-0.00520849	-0.846949	-2.49902
I3L7Y9	BAR domain-containing protein OS	-0.00586101	0.503152	-0.49803	-0.233026	-0.112259	0.05666	0.379875	0.839892	-0.266879	0.00586101	-0.521877	-0.092484	0.188884	0.348653	0.757099	-2.21931
F1RMA2	Bridging integrator 3 isoform X5 OS	-1.11554	0.446909	-0.866681	0.124384	0.508857	0.995591	0.579192	0.955859	-0.698738	-0.785871	-1.06698	0.390899	-0.124384	-0.169443	0.419176	-2.60167
A0A287A5K7	Uncharacterized protein OS	-1.32838	-0.063814	-1.12434	-0.282768	-0.034656	0.272205	0.137235	0.211319	0.071509	0.461312	-0.036106	0.50911	0.403228	-0.30464	0.034656	-2.54844
F1S402	UBIQUITIN_CONJUGAT_2 domain-containing protein OS	0.82932	0.208562	0.313391	1.09694	0.411118	1.35052	0.545265	0.371397	-1.41059	-1.3709	-1.65581	-0.331072	-0.564758	-1.15999	-0.208562	-3.61665
A0A287BH83	RING-type domain-containing protein OS	-1.32455	0.395292	-0.596681	-0.236424	0.539127	0.686662	0.303656	0.623403	-0.920371	-0.618581	-1.32167	0.236424	0.273017	-0.678641	0.265541	-2.93063
F1RN71	Uncharacterized protein OS	-2.65581	0.250497	-1.32858	-0.155908	0.0561643	0.525875	0.151552	0.672307	-1.03299	-1.25299	-1.78053	0.0669307	0.207357	-0.0561643	0.209788	-1.56159
F1SBG3	B-cell linker protein OS	-1.7388	0.403495	-0.696691	-0.022591	0.0863989	0.464801	0.552649	0.896386	-0.909352	-1.07716	-1.58629	0.022591	-0.345285	0.258686	0.792393	-2.30379
F2Z5S5	Uncharacterized protein OS	-0.134274	0.424138	-1.14378	-0.472472	0.320846	0.4983	0.354981	0.723163	-1.13743	-0.142188	-0.232232	0.148617	0.134274	-1.22549	0.229348	-2.66654
F1S8V1	Uncharacterized protein OS	-0.923911	0.534701	-0.75432	-0.189949	0.395013	0.735101	0.619465	1.06782	-1.16492	-0.891291	-0.935961	0.379299	0.189949	-0.797632	0.531424	-2.93899
A5A769	Biogenesis of lysosome-related organelles complex 1 subunit 3 OS	-1.29644	0.253285	-0.806049	-0.0613948	0.350352	0.726582	0.355285	0.856626	-0.252633	-0.615471	-0.608251	0.177336	0.0613948	-0.167047	0.382115	-2.43008
I3LDD9	Uncharacterized protein OS	-0.248231	0.152515	-0.398895	-0.038452	0.123502	0.31648	0.161626	0.530525	-0.368601	-0.286659	-0.256876	0.131473	0.084344	-0.427885	0.038452	-2.65353
A0A286ZJX3	Biogenesis of lysosome-related organelles complex 1 subunit 5 OS	-1.80829	0.33381	-0.922603	-0.0651465	0.281815	0.898199	0.538216	1.118	-0.772124	-0.962803	-1.22709	0.324845	-0.28082	0.0651465	0.390148	-1.57948
F1SSF5	Biliverdin reductase A OS	-0.992565	0.10207	-0.10207	0.185486	0.192225	0.336679	0.235926	0.962419	-0.889367	-0.615466	-0.733102	0.175999	-0.363457	-0.309155	0.2834	-1.92102
I3LQH7	Flavin reductase (NADPH) OS	-1.12398	0.154129	-1.03145	-0.00424325	0.0931161	0.449632	0.134936	0.63683	-0.40376	-0.339711	-0.683735	0.119395	0.20041	-0.209712	0.00424325	-2.00566
I3LIF5	Uncharacterized protein OS	-1.26506	1.21134	-1.51237	0.107362	0.831677	0.902672	0.611209	1.28574	-0.850616	-0.932536	-1.1776	0.054782	-0.054782	-0.549046	0.115568	-2.52135
A0A287A038	Protein kinase domain-containing protein OS	-0.648725	0.504102	-0.308555	0.198749	0.158966	0.497737	0.523029	0.551988	-0.595585	-0.74105	-0.76381	-0.122199	0.122199	-0.273657	0.473075	-2.167
F1SI16	Receptor protein serine/threonine kinase OS	-0.34305	0.629692	0.189541	-0.0304087	0.309728	0.421804	0.527908	0.63851	-0.556789	-0.541216	-0.856521	0.0304087	0.0815994	-0.430513	-0.0428867	-2.771
F1RG23	Bms1-type G domain-containing protein OS	-0.823434	0.0495023	-0.435136	0.0429113	0.0336333	0.535116	0.3521	0.266435	-0.809055	-0.619394	-1.23927	-0.0027221	-0.191865	0.0027221	0.421829	-2.39879
I3LG80	Uncharacterized protein OS	-0.388014	0.403631	-0.24909	0.379358	0.651797	0.833634	0.808856	0.588356	-1.06158	-1.22626	-1.56257	0.169565	-0.169565	-0.521207	0.190726	-3.64715
F1SJY7	Uncharacterized protein OS	-0.77588	0.837417	-1.18999	-0.527224	0.312723	0.749727	0.555434	0.81553	-0.82088	-0.679485	-1.00335	0.166208	0.59986	-0.166208	0.659437	-1.44346
A0A287AJ14	Uncharacterized protein OS	-1.04997	0.873642	-0.373789	0	0.50068	0.947195	0.69974	1.3653	-0.478892	-1.08814	-1.4463	-0.025698	0.172954	0	0.726375	-2.32739
F1RJT5	BCL2/adenovirus E1B 19 kDa protein-interacting protein 3-like isoform 1 OS	0.0372946	0.436519	0.0608664	0.417311	0.228192	0.29051	0.304517	0.735152	-0.468121	-0.665593	-0.60761	-0.239223	-0.0372946	-0.23584	-0.0461547	-2.94051
F1SJZ3	Biorientation of chromosomes in cell division protein 1 OS	-0.744056	0.153944	-0.55727	0.234864	-0.0470291	0.612895	0.0470291	0.510335	-0.393849	-0.307636	-0.164026	0.208392	0.236112	-0.329634	0.0654075	-2.78907
A0A286ZIL6	Biorientation of chromosomes in cell division protein 1-like 1 OS	-1.42956	0.44165	-0.687837	0.0295071	0.253963	0.625988	0.457854	0.860214	-0.824865	-0.985025	-1.27161	0.123249	-0.0295071	-0.121212	0.343898	-2.58466
F1SDF8	Uncharacterized protein OS	-0.591312	-0.126458	-0.317999	0.100566	0.0453558	0.437215	0.112407	0.495649	-0.0106239	0.0106239	-0.13421	0.0273995	0.115026	-0.756177	-0.170417	-2.49235
A0A287BQV4	Uncharacterized protein OS	-0.80415	0.0071775	-0.363577	-0.0071775	0.273118	0.654775	0.362677	0.690794	-0.0778075	-0.200739	-0.279863	0.136143	0.174808	-0.843678	0.105337	-2.36974
A0A287B5J6	Ribosome biogenesis protein BOP1 OS	-0.103555	0.235136	-0.176969	0.140265	0.00370115	0.315851	0.157623	0.235136	-0.444697	-0.622452	-1.19042	-0.00370115	0.199481	-0.125997	0.435621	-2.51912
A0A287AHF8	BLOC-1 related complex subunit 5 OS	-0.118544	0.694934	-1.26051	-0.856039	0.337268	0.343055	0.179326	0.665676	-1.27108	-0.176973	-0.506791	0.118544	0.391888	-1.1426	0.477511	-2.61259
I3L825	BLOC-1-related complex subunit 6 OS	-0.510636	0.198706	-0.542068	0.0770876	0.0421876	0.534261	0.117883	0.45475	-0.241052	-0.451742	-0.372379	0.0506408	-0.0421876	-0.21887	0.148396	-2.76376
A0A287B4Y0	Uncharacterized protein OS	-0.778447	0.414198	-0.81665	-0.101004	0.200029	0.513	0.121388	0.777745	-0.775936	0.353562	0.0424876	-0.285143	0.723757	-1.20189	-0.0424876	-1.50041
A0A286ZQ31	Phosphoglycerate mutase OS	-1.58169	-0.0284385	-0.674205	-0.0608598	0.0732329	0.296844	0.364678	0.516797	-0.492649	-0.550666	-0.876436	0.0284385	0.304137	0.36002	0.597166	-1.8958
F1RWY7	AB hydrolase-1 domain-containing protein OS	-1.1845	0.440212	-0.225368	0.554483	0.76944	0.965591	0.537481	1.32321	-0.242047	-0.256801	-0.328461	0.344313	-0.0965595	-0.594171	0.0965595	-2.36453
A0A287ADQ5	Uncharacterized protein OS	-0.0380245	0.0380245	0.259094	0.735184	0.521334	1.34768	0.583562	0.851452	-1.0538	-1.15635	-1.56105	-0.244578	-0.199445	-0.773291	0.177215	-2.87659
F1S9K3	3'(2'),5'-bisphosphate nucleotidase 1 isoform X1 OS	-0.955424	0.109628	-0.010918	0.296479	0.185651	0.395845	0.255256	0.706109	-0.223912	-0.225734	-0.302522	0.010918	-0.02831	-0.152829	0.270853	-2.2683
A0A287B9K5	Uncharacterized protein OS	-0.489453	0.19038	-0.19355	0.247109	0.0351596	0.455091	0.201656	0.280578	-0.544909	-0.4206	-1.03075	-0.0351596	0.20415	-0.262463	0.265135	-2.97326
A0A286ZVY2	Uncharacterized protein OS	-1.43856	0.487837	-1.06762	-0.480713	0.0741243	0.368795	0.175071	0.752196	-1.5689	-1.72136	-1.99918	0.320518	-0.0661613	0.0661613	0.68011	-2.49242
A0A286ZSU2	BRCA1-associated protein OS	-1.50186	1.10069	-1.06359	0.140249	0.817571	1.55629	0.822567	1.50437	-1.0006	-0.877452	-1.1369	0.261537	-0.140249	-0.553932	0.194153	-3.23309
A0A286ZS33	Breast cancer type 1 susceptibility protein homolog OS	-1.4064	0.233807	-1.2536	-0.450479	-0.0519955	0.204526	0.236271	0.204372	-0.167718	0.21575	-0.394977	0.0519955	0.41655	-0.149102	0.662356	-2.77154
A0A287B8J8	Tower domain-containing protein OS	-1.62559	-0.0039635	-1.03006	-0.602738	-0.0364495	0.255183	0.0039635	0.473496	0.0488435	-0.0958295	0.281161	0.142287	0.0736565	0.217376	-0.105745	-2.25003
K7GRH5	Lys-63-specific deubiquitinase BRCC36 isoform 2 OS	-1.3299	0.566142	-0.885391	-0.215283	0.215283	0.546633	0.500201	0.579574	-0.991722	-0.894801	-1.18155	0.292881	0.313062	-0.450251	0.247924	-2.44947
A0A287BHW3	Uncharacterized protein OS	-0.76826	0.345984	-0.828267	-0.148108	0.0588063	0.492547	0.263449	0.556871	-0.604284	0.061815	-0.680168	-0.0588063	0.444944	-0.474388	0.560066	-2.71579
A5D9K6	Bromodomain containing 2 OS	0.161094	0.162387	-0.434257	-0.0867527	0.0867527	0.396917	0.1057	0.288564	-0.794316	-0.72572	-1.09755	-0.177099	0.372539	-0.232114	0.573541	-2.39949
F1S033	Bromodomain containing 3 OS	-0.176724	0.324043	-0.0484697	0.0484697	0.0803002	0.410417	0.0979855	0.39289	-0.539295	-0.551968	-0.506032	-0.133223	0.369558	-0.522567	0.161469	-2.90607
I3L6E5	Uncharacterized protein OS	-0.383953	0.426971	-0.229867	0.001598	0.147203	0.47489	0.272854	0.62125	-0.702237	-0.638672	-0.686724	-0.001598	0.409035	-0.348939	0.431717	-2.5612
I3L640	Bromo domain-containing protein OS	-0.37206	0.131238	-0.205797	0.100864	0.164994	0.0755282	0.442195	0.718021	-0.373997	-0.451677	-0.427327	-0.0755282	0.203188	-0.27472	0.218701	-2.91315
A0A287BBE7	Bromodomain-containing protein 8 isoform 1 OS	-0.551857	0.120569	-0.68891	-0.120569	0.409303	0.777266	0.472728	0.426567	-0.579164	-0.565446	-0.908001	0.167874	0.376513	-0.281328	0.427711	-2.21557
A0A287AHP6	Uncharacterized protein OS	-1.62419	0.093041	-1.10936	-0.475876	0.003354	-0.00783001	0.026686	0.061732	-0.003354	-0.733354	-1.37958	0.676144	0.11183	0.476351	0.592983	-2.1018
F1SND4	Ribosome biogenesis protein BRX1 homolog OS	-0.254858	0.0165987	-0.0715201	0.643924	0.0825535	0.705689	0.266577	-0.0875501	-0.0843301	0.50224	-0.607892	-0.0045511	-1.15183	0.0045511	0.134612	-2.30084
F2Z5S6	Uncharacterized protein OS	-0.51111	0.619138	-1.26344	-0.491937	0.50568	0.981708	0.529331	1.1845	-1.1204	-0.188217	-0.468325	0.188217	0.420972	-1.04861	0.589069	-1.94721
F2Z5N1	Uncharacterized protein OS	0.019808	0.513917	-0.864595	-0.647985	0.375414	0.458487	0.173841	0.591685	-1.41253	-0.52204	-0.47063	-0.019808	0.630077	-0.8332	0.431716	-2.33852
F1SQG0	Uncharacterized protein OS	-0.406818	1.6329	-0.632638	-0.104901	0.801804	1.08252	0.851356	1.39514	-0.892768	-0.759698	-0.931978	0.517482	0.104901	-0.214267	0.373327	-2.38841
I3LSN1	Bromodomain and PHD finger-containing protein 3 OS	0.074603	0.082456	-0.192849	0.074603	0.152771	0.425223	-0.155422	0.546011	-0.528587	-0.157271	-0.404852	-0.074603	0.308201	-0.385223	0.180843	-2.3809
I3L7U1	BSD domain-containing protein OS	-1.3862	0.369367	-0.601573	-0.0547588	0.204868	0.476205	0.417479	0.758627	-0.890843	-0.938496	-0.960191	0.0547588	0.0815507	-1.00177	0.406926	-3.0273
B0LY42	Basigin isoform 2 OS	-0.974944	0.208724	0.257831	0.0741903	-0.0814437	-0.0741903	0.173813	0.208724	-0.641178	-1.08728	-1.38819	-0.205918	0.191976	0.397945	0.327399	-1.95883
I3LPW1	B box and SPRY domain-containing protein isoform 2 OS	-0.633865	0.480778	-0.531295	0.0209709	-0.0209709	0.32208	0.0750614	0.688497	-0.640388	-0.50725	-0.765523	0.0428509	0.3176	-0.846168	0.0319524	-2.39636
K7GN83	Uncharacterized protein OS	-0.063907	0.773964	-1.78723	-0.821579	0.182758	0.063907	0.181313	1.1238	-1.57701	-0.821579	-0.720887	0.202835	0.646777	-1.30991	0.653045	-0.905069
A0A287AFM0	TATA-binding protein-associated factor 172 OS	-0.306953	0.0415938	-0.157918	0.291323	-0.0415938	0.357756	0.0900924	0.257512	-0.310446	-0.303468	-0.496859	0.162436	0.214408	-0.125252	0.263399	-2.37664
F2Z5H8	Transcription factor BTF3 OS	-1.01008	0.114955	-0.637977	0.0651068	0.165769	0.705352	0.353973	0.653821	-0.349931	-0.815952	-0.718147	0.0280027	-0.296457	-0.0280027	0.214854	-2.82637
A0A287BEU1	Transcription factor BTF3 OS	-1.14339	0.154087	-0.360486	-0.00891835	0.00891835	0.166366	0.13172	0.576505	-0.520536	-1.03821	-0.814204	0.0399447	0.142947	-0.203734	0.288224	-2.27665
A5YRP0	B-cell translocation gene 1 OS	0.236853	0.0933876	-0.29893	0.0151365	0.301629	0.224632	0.190133	0.570898	-0.735029	-0.523284	-0.797352	-0.0151365	-0.132494	-0.491575	0.0432415	-2.70355
F2Z5F3	WD_REPEATS_REGION domain-containing protein OS	-0.613516	0.360532	-0.301442	0.129982	0.165845	0.335315	0.121578	0.685314	-0.194392	-0.11943	-0.388787	0.00152825	-0.027774	-0.00152825	0.17264	-2.35908
F1SJV0	Uncharacterized protein OS	-0.621083	0.235038	-0.185171	0.0976534	0.0963434	0.449409	0.166732	0.729457	-0.689533	-0.749557	-0.574403	-0.015423	0.015423	-0.416358	0.348406	-3.13658
F1RJN0	Uncharacterized protein OS	-0.699156	0.650019	-0.814188	-0.227277	0.324912	0.747224	0.512408	1.23604	-1.31961	-1.47715	-2.03463	0.0655845	0.284572	-0.0655845	0.578412	-2.27874
K7N7E9	Protein BUD31 homolog isoform X2 OS	-0.34019	0.562796	-0.598359	-0.0202125	0.110353	0.391405	0.0202125	1.24071	-0.47818	0.333	-0.140252	-0.138131	1.51779	-0.0881635	0.420463	-0.502518
I3LH38	Uncharacterized protein OS	-1.77851	0.00074549	-1.2343	-0.287835	0.0293345	0.354312	-0.00074549	0.317385	-1.32269	-1.34702	-1.24749	0.501791	0.0494935	0.922945	1.5487	-1.30352
F1SI55	Basic leucine zipper and W2 domain-containing protein 1 OS	-2.42025	0.564547	-1.98901	-0.961658	0.166266	1.17013	0.93025	1.47292	-1.59834	-1.72483	-2.22877	-0.147549	0.147549	0.575091	1.33774	-1.36546
A0A287AEC0	W2 domain-containing protein OS	0.0376676	0.157963	-0.850658	-0.550634	-0.403858	0.568696	0.241448	0.52176	-0.435003	-1.94773	-0.191859	0.838335	-0.0376676	0.225133	0.528424	-2.01812
F1SMA8	Uncharacterized protein OS	-1.93626	-0.017414	-1.14422	-0.527995	-0.111616	0.082452	0.02471	0.069044	0.017414	-0.177916	-0.810579	1.00885	0.528226	0.440539	0.21347	-1.65555
F1STK8	Ester hydrolase C11orf54 isoform a OS	-0.623834	0.086851	-0.906714	-0.340424	0.212382	0.383182	1.25701	2.48622	-0.402454	0.036532	-0.166327	-0.055391	2.04043	-0.036532	0.040978	-1.76416
A0A287AEP6	Small acidic protein OS	-2.07062	0.129962	-0.522492	0.0317444	0.170274	0.654785	0.426882	0.752241	-0.686986	-1.18736	-1.24092	0.0803247	-0.115248	-0.0317444	0.23301	-2.63452
F1RU27	UPF0696 protein C11orf68 isoform 2 OS	-1.0288	0.078444	-0.363748	0.217363	-0.078444	0.285178	0.333433	0.402918	-0.505103	-0.32017	-0.274249	0.174294	0.252924	-0.0911271	0.0869138	-2.13313
A0A287BPI4	Uncharacterized protein OS	-1.63326	0.139239	-1.08678	-0.522179	-0.003453	0.31557	0.081856	0.32556	-0.510274	-0.97889	-0.59141	0.254597	0.303507	0.003453	0.799202	-2.62763
A0A287A1Z7	Uncharacterized protein OS	-0.683342	0.822031	-1.03071	0.74803	0.738935	1.07245	1.07967	0.798148	-1.63525	0.054234	-1.1651	0.113494	-0.29686	-0.054234	-0.062161	-2.5773
A0A287B0P3	Uncharacterized protein OS	-1.3331	0.259735	-1.3433	-0.0288981	0.190749	0.711902	0.424036	0.812531	-1.14597	-0.964529	-0.959293	0.0288981	0.0472261	-0.532542	0.118297	-2.25403
A0A286ZZ06	Uncharacterized protein OS	-0.356214	0.0588233	-0.225958	0.0813658	0.0502782	0.275932	0.264896	0.540798	-0.548318	-0.291425	-0.252142	-0.0502782	0.145618	-0.442021	0.067318	-2.4063
F1RFR7	Uncharacterized protein OS	-0.663182	-0.036496	-0.796121	-0.418467	0.202486	0.419492	0.291669	0.0543495	-0.20375	-0.211158	0.0954634	0.012029	0.283786	-0.012029	0.446814	-2.47308
F1SFR1	Uncharacterized protein OS	-0.39271	0.017595	-0.331047	-0.100914	0.462734	0.478893	-0.215105	0.634335	-0.29724	0.0794561	-0.017595	0.122703	0.227518	-0.369793	0.181714	-1.92206
A0A287ALR8	Protein C12orf4 homolog isoform X1 OS	0.09672	0.375733	0.265705	0.372942	0.106832	0.77606	0.386841	0.616526	-1.17316	-1.36961	-1.47809	-0.119028	-0.218219	-0.691398	-0.09672	-2.68805
F1RJG8	Uncharacterized protein C12orf43 isoform b OS	-0.883028	0.250442	-0.0255238	0.0255238	0.167312	0.362128	0.159267	0.557399	-0.75842	-0.919483	-0.855599	-0.0393443	0.400172	-0.218169	0.289049	-2.83135
I3LPE1	Uncharacterized protein OS	-0.876813	0.000702649	-0.525759	-0.000702649	0.0945145	0.347422	0.197381	0.40056	-0.772296	-0.806301	-0.690634	0.0132906	0.129625	-0.00633835	0.165155	-2.35246
A0A287A018	Uncharacterized protein OS	-0.821183	0.406458	-1.17536	-0.733143	0.0798073	0.269164	0.186159	0.858728	-0.735453	0.289757	0.160297	-0.175365	0.247102	-1.54107	-0.0798073	-2.3988
F1RFL3	RF_PROK_I domain-containing protein OS	-2.11567	-0.0978319	-0.407721	0.347906	0.477967	0.867088	0.201022	0.733048	-1.21358	-1.93203	-1.58165	-0.231151	0.0978319	0.191821	0.356167	-3.23115
A0A287B1Y8	Uncharacterized protein OS	-1.47273	0.722229	-0.66164	-0.0204765	0.583005	0.635661	0.291512	1.00722	-1.1631	-0.189802	-1.25785	0.0204765	0.948027	-0.762244	0.606991	-1.98731
A0A287APY4	Uncharacterized protein OS	0.159819	0.542331	0.0301055	0.231521	0.24602	0.802818	0.5517	1.13042	-1.3237	-1.11122	-1.60552	-0.153096	-0.259019	-0.84548	-0.0301055	-2.86056
F1S9D0	Uncharacterized protein OS	0.0275417	0.352768	-1.11267	-0.381005	0.25742	0.581651	0.282798	0.698465	-0.941277	-0.0275417	-0.0322277	-0.206659	0.397598	-0.989067	0.371814	-2.5233
A0A286ZTB2	Uncharacterized protein OS	-0.245267	0.299053	-0.574973	0.232382	-0.071899	0.357681	0.0874789	0.024538	-0.188237	-0.13517	-0.171558	0.272211	0.1828	-0.024538	0.362779	-2.25304
F1SN46	Uncharacterized protein OS	0.00429805	0.510994	-0.973026	0.152153	-0.0216452	0.00715195	-0.00429805	0.656245	-0.973026	0.393756	-0.551675	-0.10086	0.332498	-0.479986	0.946	-1.52463
I3LPV6	Uncharacterized protein OS	-2.0353	0.830948	-0.755193	0.343871	0.587797	1.17415	0.962551	1.22881	-1.11556	-1.32604	-1.30044	0.157952	-0.145077	-0.595204	0.145077	-2.82739
A0A287B3G9	Protein CCSMST1 OS	-1.00206	0.166559	-0.370929	0.0197642	0.308089	0.562227	0.328053	0.605208	-1.0168	-0.749819	-1.18635	0.200082	-0.0197642	-0.346524	0.0819467	-2.68719
A0A287B2Y5	Uncharacterized protein OS	-1.37109	-0.0152375	-1.09405	-0.302002	0.0152375	0.332551	0.271787	0.429492	-0.231246	0.118217	-0.105116	0.439016	0.775926	-0.0365055	0.729892	-1.3934
F1RV34	Uncharacterized protein C17orf80 isoform c OS	-0.209185	0.45285	-0.904241	-0.487611	0.19551	0.601251	0.280442	0.395919	-0.251005	-0.762119	-1.18004	0.272029	-0.19551	0.787868	0.412598	-2.6755
F1RPS7	RNF111_N domain-containing protein OS	-0.223095	0.0291418	-0.0291418	0.15394	0.164647	0.411591	0.100577	0.306749	-0.331755	-0.586163	-0.168324	-0.0306677	0.30433	-0.473969	0.0710038	-3.30012
A0A286ZWG0	Chromosome 18 open reading frame 32 OS	-2.50742	0.914186	-1.29712	-0.468459	0.3502	0.22744	0.638914	1.41066	-1.07798	-1.31083	-1.9544	0.179185	1.41691	-0.179185	1.05365	-1.32005
M3UZ63	UPF0556 protein C19orf10 OS	-0.88829	0.39031	0.0829694	-0.104294	0.297045	0.355888	0.425076	0.273073	-0.893993	-0.189384	-0.851765	0.348663	0.218625	-0.0829694	-0.105948	-0.934558
A0A286ZUM0	Uncharacterized protein OS	-1.73377	0.203624	-1.45707	-0.480767	-0.0630755	0.0809985	0.0630755	0.116979	-0.758642	0.611812	-0.350745	0.257087	1.0631	-0.365125	0.783503	-1.0485
I3LT16	UPF0449 protein C19orf25 isoform X1 OS	-0.961115	0.398304	-0.500171	-0.073681	0.484009	0.803242	0.674051	0.999194	-0.01198	-0.225484	-0.187958	0.480333	0.01198	-0.075483	0.143298	-2.48094
A0A286ZR36	DUF5577 domain-containing protein OS	-1.52737	0.171849	-0.40217	0.144744	0.105664	0.463684	0.245605	0.516543	-1.00726	-0.993506	-1.92664	-0.101475	0.0941179	-0.0941179	0.23863	-2.80635
F1SD77	Leydig cell tumor 10 kDa protein homolog OS	-2.37888	0.340533	-1.24208	0.0156577	0.375438	1.21447	0.689297	1.08056	-0.623412	-1.15981	-1.11713	0.185255	-0.820001	-0.0156577	0.540373	-3.01114
F1S3I0	Repressor of yield of DENV protein isoform 1 OS	-1.5868	0.403145	-0.483708	0.0333502	0.234481	0.53278	0.316523	0.616381	-0.288215	-0.625155	-0.935129	-0.0333502	0.0691155	-0.519384	0.245776	-2.70749
A0A287BKX0	Uncharacterized protein OS	-1.63278	1.43429	-1.28905	-0.146311	1.24899	1.75149	1.36171	1.8432	-1.27755	-1.37832	-1.49328	1.01195	-0.023614	0.023614	1.11912	-1.74704
A0A287AN31	Uncharacterized protein OS	-0.816365	0.390514	-0.438338	-0.0730535	0.793802	0.921241	0.71134	1.13927	-0.287557	-0.307518	-0.16515	0.54815	0.0730535	-0.285357	0.375291	-2.29418
A0A287B674	Uncharacterized protein OS	-1.36274	0.184551	-0.934748	-0.596332	0.282898	0.514092	0.318116	0.889095	-0.691191	-0.052761	-0.622804	0.141944	0.052761	-1.21446	0.357018	-2.50322
F1RGS9	Uncharacterized protein C1orf131 isoform b OS	-0.608905	0.291196	-0.35564	0.373205	0.388553	0.740197	0.208574	0.62721	-0.1366	-0.313637	-0.21562	-0.05648	0.034138	-0.034138	0.606577	-2.49187
A0A286ZWQ4	Uncharacterized protein OS	-1.36306	0.519721	-1.04592	-0.289256	0.545426	0.838403	0.582112	0.886966	0.191023	-0.312157	-0.485693	0.186946	-0.186946	-0.540975	0.240385	-2.98026
A0A287A947	DUF4706 domain-containing protein OS	-0.571661	0.304197	-0.499298	0.0682617	0.271721	0.485049	0.342921	0.7568	-0.584816	-0.803176	-0.800616	0.0724576	-0.0682617	-0.310811	0.137983	-2.4166
F1S3P0	Uncharacterized protein C1orf21 OS	-1.25578	0.027671	-0.592019	0.018283	0.144468	0.684137	0.49629	0.374034	-0.61375	-0.549514	-0.582464	-0.029599	0.471278	-0.018283	0.579503	-1.84835
F1SFC0	Type III endosome membrane protein TEMP OS	-0.799571	0.992724	-0.251934	-0.451243	0.251934	0.488517	0.531962	0.815312	-1.18747	-0.727698	-1.22124	0.363725	0.388816	-0.358551	0.705761	-2.22124
F1S5R8	Multiple myeloma tumor-associated protein 2 OS	-0.582051	0.331845	-0.30383	0.0787428	0.20089	0.446293	0.199558	0.541857	-0.476118	-0.536963	-0.279488	-0.0787428	0.121556	-0.250082	0.253167	-3.06108
F1RGK8	NICE-3 OS	0.0269946	0.221305	-0.127678	0.109901	-0.0149436	0.178731	0.0149436	0.0832186	-0.72831	-0.542715	-0.778695	-0.109976	0.160614	-0.401439	0.198992	-1.81409
F1SEW8	UPF0690 protein C1orf52 OS	-0.940994	-0.0205352	-0.10636	0.35024	0.0516898	0.416703	0.288061	0.446032	-0.467294	-0.719433	-0.762654	0.0205352	0.468194	-0.0596355	0.472585	-2.84496
A0A287B7D8	Uncharacterized protein OS	-2.75777	0.516629	-0.909034	0.157998	1.58472	2.0265	1.05625	1.51801	-1.04618	-0.977974	-1.50217	-0.029836	0.143863	-0.676664	0.029836	-2.99774
A0A287BNF7	Complement C1q subcomponent subunit A OS	-1.36555	0.204449	-1.42815	-0.543059	0.0322155	0.164731	0.248929	0.428276	-0.408152	-0.476614	-1.25924	0.686402	-0.0322155	0.328813	1.0487	-1.21809
A0A0D5BWD2	Mitochondrial complement component 1 Q subcomponent-binding protein OS	-0.635081	0.283416	-0.307105	-0.256031	0.294472	0.263551	0.376526	0.668553	-0.651488	-0.682464	-0.493134	0.256031	0.312711	-1.20152	0.343789	-3.02623
F1SLV6	Uncharacterized protein OS	0.0963533	0.0318896	-0.332434	0.135406	0.018025	-0.018025	-0.037197	0.0516842	-0.748129	0.044103	-0.508539	-0.308943	0.261056	-0.257447	0.733155	-1.22046
A0A286ZMS2	Uncharacterized protein OS	-0.118279	0.131464	0.195342	0.0661454	0.0676632	0.240451	0.018283	-0.037736	-0.290363	-0.272969	-0.797732	-0.018283	-0.09942	0.528611	0.867849	-1.27874
F1RQW7	Uncharacterized protein OS	-0.335684	-0.162465	-1.50117	-0.643335	0.397715	0.150308	-0.243688	0.136108	0.182447	0.958672	0.009409	-0.009409	0.19483	-0.088903	0.586038	-1.16246
A0A286ZL93	Uncharacterized protein OS	0.713245	0.975713	0.052074	0.410456	0.807558	0.797972	0.6927	1.10745	-1.03015	-1.04153	-1.3691	-0.127285	-0.320757	-0.870657	-0.052074	-3.06385
A0A286ZTR4	Uncharacterized protein OS	-0.587883	-0.022411	-0.737049	-0.465453	0.309841	0.799892	0.297317	0.924831	0.022411	0.106647	0.370878	0.344339	-0.44848	-0.781524	-0.315586	-2.34277
I3L9E6	C2 domain-containing protein 2 isoform 1 OS	-1.55101	0.018312	-1.47586	-0.547857	-0.018312	0.078143	0.067497	0.049302	-0.579275	-0.414359	-0.951713	0.431275	0.822466	0.097142	0.852213	-1.10333
F1SAH4	SMP_C2CD2L domain-containing protein OS	-0.669812	0.160128	-0.0368495	0.247092	-0.0216559	0.182962	0.0216559	0.124565	-0.444961	-0.665512	-1.06348	0.11959	0.276444	-0.146437	0.312858	-2.49558
I3LFE2	Uncharacterized protein OS	-0.412641	0.190801	-0.0576188	0.321132	0.166998	0.680904	0.342541	0.656419	-0.662189	-0.940944	-0.681266	0.0576188	-0.597338	-0.231249	0.232171	-2.77293
F1RKL8	Glutaredoxin-like protein OS	-1.15308	0.416104	-1.07774	-0.27586	0.312759	0.569693	0.662421	1.07003	-0.683593	-1.00917	-0.889484	0.188224	0.0446027	-0.0446027	0.207996	-2.57599
A0A287AGU9	Ashwin isoform 1 OS	-0.700214	0.325186	-0.276872	0.0591276	0.258192	0.599506	0.409535	0.77105	-0.296109	-0.589278	-0.568079	0.174022	-0.0706756	-0.0591276	0.258192	-2.60839
F1RY07	Uncharacterized protein OS	-0.391585	0.566208	-0.155807	0.0025035	-0.0025035	0.125394	0.0289155	0.594115	-0.75572	-0.0312055	-0.17452	0.119262	0.956807	-0.255874	0.0580615	-1.11548
A0A287ABE0	Uncharacterized protein OS	-0.369515	0.0855317	-0.339513	-0.40563	0.167705	-0.0855317	0.120236	0.336811	-0.700836	-0.849602	-0.661005	0.258201	0.348784	0.344441	0.545082	-2.53766
F1SBS4	Complement C3 OS	-0.763872	-0.0695355	-0.477497	-0.760432	0.476608	0.283547	0.311593	-0.0111525	0.0111525	-0.387213	-0.44677	0.75053	0.392602	1.60881	1.47952	-0.403214
A0A287B2Q2	Uncharacterized protein C3orf18 isoform 1 OS	0.0366455	0.456477	0.312432	1.18978	0.963197	0.781276	0.627418	1.18978	-1.50272	-1.02141	-1.3209	-0.258123	-0.340977	-0.865799	-0.0366455	-3.47942
A0A286ZQ22	Uncharacterized protein OS	0.259429	0.232356	-0.920026	-0.240373	0.129727	0.619514	-0.0427988	0.447737	-1.02228	0.0505688	-0.119195	-0.154492	0.0427988	-0.826917	0.10755	-2.88502
F1RQW2	Complement C4-A isoform 1 preproprotein OS	-0.408113	-0.0578155	-0.129812	-0.127703	0.105182	0.402163	0.108761	0.0578155	-0.129812	-0.14892	-0.326077	0.685956	0.20053	1.28602	1.47609	-1.11721
A0A287AL92	Uncharacterized protein OS	-1.65826	0.072923	-1.13176	-0.354854	-0.075294	0.199562	0.105766	0.212092	-0.82164	-0.071442	-0.93214	0.12589	0.957902	0.071442	1.45092	-0.63191
A0A287B7A1	PID domain-containing protein OS	-1.07465	0.507128	-0.533879	-0.0778343	0.242816	0.561418	0.26815	0.397756	-0.283303	-0.596517	-0.755906	0.285622	0.0778343	-0.0954973	0.332007	-2.43858
A0A286ZLD0	Uncharacterized protein OS	-1.00967	0.310241	-0.326142	0.393974	0.285788	0.872119	0.57305	0.949401	-0.518488	-0.401356	-0.186546	0.50994	-0.313633	-0.219227	0.186546	-3.32824
F1S4L8	Uncharacterized protein OS	-1.41055	0.375104	0.338205	0.516765	0.471722	0.75057	-0.133829	0.205179	-0.122028	-0.600128	-0.373357	0.256935	-0.43043	-0.426796	0.122028	-3.15471
A0A286ZVC5	UPF0461 protein C5orf24 isoform X1 OS	-2.05927	0.331818	-0.906623	-0.123476	0.414143	0.901557	0.557539	1.06927	-0.84426	-1.37477	-1.60924	0.284389	-0.270438	0.123476	0.369387	-2.5447
I3LQ30	UNC119-binding protein C5orf30 homolog OS	-1.54576	0.536846	-1.20744	-0.00970601	0.6435	1.32496	0.57644	0.950667	-0.304355	-0.108988	-0.00970601	0.348712	0.00970601	-0.049333	0.116121	-2.85487
F1SMI8	Uncharacterized protein OS	-1.61993	0.301306	-1.07037	-0.184577	0.18311	0.581202	0.237245	0.350429	-1.33086	-0.972073	-1.19593	-0.18311	0.664887	1.42549	2.39161	-1.4487
F1RKJ3	Immortalization up-regulated protein OS	-0.356164	0.255271	-0.0156535	-0.172941	0.261815	0.0156535	0.18242	0.412511	-0.421053	-0.579669	-0.663967	0.251989	0.201833	-0.102622	0.572821	-2.98177
I3LLQ7	Uncharacterized protein OS	-0.406827	-0.133604	-0.285425	-0.0082099	0.091826	0.428803	0.18406	0.565197	0.27569	0.133246	0.0606774	0.0082099	-0.0805523	-0.592422	-0.136883	-2.69744
A0A286ZRH1	Uncharacterized protein OS	-0.898782	0.531043	-0.294136	0.119872	0.595779	0.766321	0.5891	0.973693	-0.372367	-0.542835	-0.572481	0.408677	-0.119872	-0.321141	0.455942	-2.20825
A0A287BK29	Uncharacterized protein OS	-0.557791	0.443337	-0.750759	-0.351943	0.539334	0.597257	0.436553	0.720589	-1.11924	-0.603668	-0.219252	0.219252	0.519142	-0.997879	0.576836	-3.51991
A0A286ZJG3	Uncharacterized protein OS	-1.0595	0.283525	-1.09769	0.832932	0.287572	0.943928	-0.0156195	0.966823	-1.12612	-0.567718	-0.247741	0.0156195	1.14393	-0.285318	0.146157	-2.75481
Q9TUQ3	Complement component C7 OS	-0.00111902	0.266016	0.00111902	-0.088862	0.500854	0.849116	-0.025975	-0.192485	-0.112868	-0.241924	-0.028255	0.96946	0.249164	1.595	1.45423	-0.518252
F1RIB1	Uncharacterized protein OS	-0.446645	-0.096148	0.120846	0.177846	0.11814	0.279459	0.172637	0.430008	0.0316077	-0.110362	-0.0467146	0.0572689	-0.107191	-0.768573	-0.0316077	-2.85103
A0A287ATD8	Uncharacterized protein OS	0.527897	0.400119	0.055749	0.308179	0.829926	1.09045	0.520467	0.836922	-1.21354	-1.23688	-1.73064	-0.274291	-0.27766	-0.752373	-0.055749	-3.01418
F1RNN7	Uncharacterized protein C7orf43 homolog isoform X1 OS	-1.80887	0.424469	-0.779987	-0.00151385	0.117689	0.40973	0.149428	0.463418	-1.04771	-1.0922	-1.72641	-0.0399064	0.599524	0.00151385	0.602518	-1.7983
A0A287A720	Uncharacterized protein OS	-1.562	-0.676712	-0.589835	-0.0785439	0.330731	0.542122	-0.201985	0.285486	0.206774	0.320798	-0.336985	0.0785439	0.530319	-0.335021	0.255818	-2.6867
F1S788	MACPF domain-containing protein OS	-2.60635	-0.014487	-2.08144	-0.914719	0.148151	0.551994	0.138893	0.527372	-0.575546	-0.895569	-1.19002	0.371422	0.014487	1.65137	1.34348	-1.30744
F1S790	MACPF domain-containing protein OS	0.116331	-0.161632	-0.0344935	-0.24321	0.306543	0.540622	0.0344935	-0.127734	-0.62832	-0.479279	-0.495398	0.486933	0.114563	1.74369	1.47733	-1.67345
A0A287AFQ4	Lipocln_cytosolic_FA-bd_dom domain-containing protein OS	-1.8523	-0.045501	-1.27088	-0.491746	0.045501	0.311786	0.062466	0.089211	-0.55322	-0.27195	-0.074666	0.26978	0.107812	1.0147	0.889432	-1.79552
F1RV56	Uncharacterized protein OS	-0.572961	0.0975896	-0.0821445	0.169773	0.1961	0.581819	0.145661	0.441417	0.172428	-0.251477	-0.278411	0.0821445	-0.544348	-0.269377	-0.158479	-3.10768
A0A287BAN6	Uncharacterized protein OS	-1.47558	0.0957388	-0.415703	-0.0139218	0.0139218	0.345686	0.112102	0.397783	-0.808754	-0.907007	-1.23238	0.330615	0.239214	-0.127797	0.357172	-2.48375
F1RSQ0	UPF0598 protein C8orf82 OS	-0.403555	0.0833427	-0.267927	0.166213	0.153662	-0.0522504	-0.0171385	0.271938	-0.393287	0.288617	-0.0668644	0.145233	0.604665	-0.677347	0.0171385	-2.05386
A0A287BH90	MACPF domain-containing protein OS	-0.205399	-0.0510705	-0.152847	-0.0282525	0.298196	0.114667	0.10156	-0.319131	0.356106	0.0282525	-0.448099	0.306379	-0.0594585	1.84266	1.51424	-1.26236
A0A287BRB9	WRNPLPNID domain-containing protein OS	-1.73194	0.010393	-1.29049	-0.62359	-0.010393	0.287015	0.127039	0.324963	-0.430429	-0.407709	-0.211312	0.511154	0.951796	0.423774	0.766662	-6.25571
A0A286ZQB1	Queuosine salvage protein OS	-0.605389	0.420951	-0.0325595	0.073891	-0.0973555	0.25916	0.0325595	0.144568	-0.315224	-0.404912	-0.581424	0.26974	0.446819	-0.293647	0.425689	-1.6224
F1RQE0	Telomere length and silencing protein 1 homolog OS	-1.34726	0.383882	-0.689197	-0.0114321	0.220804	0.636168	0.608442	0.928169	-0.704019	-0.967549	-1.06305	0.134567	-0.189446	0.0114321	0.445623	-2.71649
A0A287AI92	Carbonic anhydrase 1 isoform a OS	-0.379857	0.747948	0.0430615	-0.235056	-0.166525	0.48465	0.664014	-0.0430615	0.0956825	-0.250739	-0.637156	-0.0822745	1.38585	1.70726	1.05693	-0.725697
A0A287BC72	Alpha-carbonic anhydrase domain-containing protein OS	-0.299075	0.430753	0.207608	0.0251002	-0.0982558	-0.0236029	0.0236029	0.586931	-0.625694	-0.697965	-0.882165	-0.0676098	0.287136	0.0503203	0.318004	-1.45316
A0A287A767	Alpha-carbonic anhydrase domain-containing protein OS	-0.355811	0.160606	-0.185886	0.193186	0.301102	0.181937	0.163468	0.798547	-0.673135	-0.49783	-0.160606	0.421968	-0.462096	-0.935658	0.373347	-2.45769
F1RXC2	Carbonic anhydrase 2 isoform 1 OS	-0.736441	0.324066	-0.6086	-0.175213	0.253435	0.762792	0.177829	0.346862	-0.636569	-0.0075693	-0.436881	0.128827	0.0994546	-0.303855	0.0075693	-1.57439
F1S1C3	Alpha-carbonic anhydrase domain-containing protein OS	-0.762946	0.0064405	-0.145562	0.360078	0.280123	0.607345	0.478061	0.814712	0.172799	-0.138455	-0.709309	-0.124347	-0.325541	-0.0064405	0.0950344	-2.15629
F1SQS9	Alpha-carbonic anhydrase domain-containing protein OS	-1.6957	-0.14633	-1.41503	-0.72585	-0.166241	0.052471	0.002851	0.209371	0.547702	0.743797	0.93427	0.808893	0.140382	-0.429267	-0.002851	-2.37587
F1SP80	Caspase activity and apoptosis inhibitor 1 isoform 1 OS	-0.823721	0.247995	-0.201219	0.221209	0.168651	0.267168	0.318615	0.384841	-0.798588	-0.984484	-0.692918	-0.168651	0.433385	-0.67451	0.438679	-3.33215
F1SMX5	Calcium-binding protein 39 OS	-0.480365	0.154842	-0.0529437	-0.007429	-0.0421944	0.480769	0.168127	0.519635	-0.48868	-0.135406	-0.401708	0.007429	0.339961	0.136036	0.346987	-1.54826
A0A287BIS7	Uncharacterized protein OS	-1.30116	0.287541	-0.995767	-0.137055	0.154875	0.710015	0.277566	0.631909	-0.295559	-0.446528	-0.58755	0.137055	0.234383	-0.158902	0.270038	-2.46735
F1SBB7	CDK5 and ABL1 enzyme substrate 1 isoform 2 OS	-0.602515	-0.0860763	-0.0959013	0.411424	0.173145	0.547035	0.33791	0.372762	-0.0537993	-0.146058	-0.679221	0.186717	0.0845741	-0.360251	0.0537993	-2.95511
F1SNS3	VWFA domain-containing protein OS	-0.0352379	0.196432	0.00454155	0.336096	0.241946	0.648639	0.217417	-0.0841479	-0.049268	-0.482697	-1.12483	-0.00454155	0.28234	-0.2239	0.0447223	-2.47847
A0A287B843	Voltage-dependent calcium channel subunit alpha-2/delta-1 isoform X4 OS	-0.499923	1.08351	-0.40667	-0.0056765	0.130938	0.443952	0.386795	0.646104	-0.497632	-0.374775	-0.951346	0.0056765	0.418694	-0.23842	0.760623	-1.65219
A0A287ANL1	SH3 domain-containing protein OS	-1.73844	-0.00418499	-1.77167	-0.525847	-0.178745	0.203696	0.016647	0.080612	-0.311987	0.00418499	0.221244	0.023574	0.829928	-0.01907	0.415224	-2.13936
A0A287BJU2	Uncharacterized protein OS	-0.9831	0.335625	-0.747515	0.0485395	0.372344	0.812784	0.429936	0.660372	-0.640212	-0.56407	-1.24934	-0.0485395	0.544213	-0.466928	0.783	-2.4963
F1S710	Calcyclin-binding protein isoform 1 OS	-0.446355	0.533561	-0.544941	-0.238279	0.201485	0.421451	0.309107	0.792094	-0.853294	-0.159873	-0.345785	0.159873	0.721846	-0.556854	0.564684	-1.7705
I3LLT2	Uncharacterized protein OS	-2.19726	0.024733	-1.27135	-0.383667	-0.024733	0.162286	0.080511	0.146078	-0.413966	-0.398536	-0.810163	0.261194	0.639332	0.39265	0.97564	-1.86566
A0A287AJZ2	Uncharacterized protein OS	-0.266761	0.5119	-0.180788	-0.0428203	0.111194	0.247812	0.0816782	0.43173	-0.191044	-0.308954	-0.516837	0.0428203	0.206736	-0.23635	0.105618	-2.07411
F1RMV8	Cell adhesion molecule 4 OS	-0.511812	-0.0799826	-0.331753	-0.0511917	0.235144	0.33182	0.10192	0.506594	0.0511917	-0.197751	-0.922495	0.0556105	0.910291	-0.368772	0.12593	-1.81103
B3VFB6	Calbindin 1 OS	-0.614286	0.626505	-0.608662	-0.387874	0.226492	0.758579	0.632454	0.972553	-1.01437	-0.03497	-0.044431	0.943177	0.780176	-0.862742	0.03497	-2.37588
A6P7L6	Calcitonin gene-related peptide 2 isoform X1 OS	-0.021234	0.872897	-0.127103	0.021234	1.50114	1.19921	0.905481	1.02013	-0.887973	-0.839193	-1.08244	0.306372	-0.128316	-0.644133	0.225351	-2.57378
A0A287A5M8	Calcium-binding and coiled-coil domain-containing protein 1 isoform X1 OS	-1.56267	0.562778	-1.25084	-0.0581933	0.0622783	0.353144	0.203362	0.506925	-1.12785	-0.906781	-1.37791	0.0595563	0.0581933	-1.01452	0.573312	-1.91747
F1RWF7	Uncharacterized protein OS	-1.65264	0.894602	-1.16305	0.0563781	0.377415	0.515675	0.45948	0.860971	-1.28575	-1.20874	-1.6722	-0.0563781	0.775102	-0.223093	1.06526	-1.91276
I3L650	Uncharacterized protein OS	-1.46108	0.394644	-0.65186	-0.0308685	0.349384	0.800318	0.537829	0.84595	-0.386753	-0.710235	-0.912904	0.200277	-0.271435	0.0308685	0.175259	-2.90103
F1SNH3	Caldesmon isoform X5 OS	-1.39837	0.829721	-1.09251	-0.558338	0.341958	0.381691	0.554606	1.26038	-0.312639	-0.727676	-0.185622	0.444009	-0.0622099	0.0622099	0.333119	-2.91354
F2Z5G3	Calmodulin-2 isoform 1 OS	-0.935777	0.1797	0.0007061	0.108125	-0.0007061	-0.14785	0.0588092	0.436069	-0.729687	-1.80172	-1.3347	0.084344	-0.163583	0.528068	0.250267	-3.25501
I3LQD0	Uncharacterized protein OS	-0.971934	0.0213086	-0.32797	0.106778	0.152023	0.344049	0.156963	0.530725	-0.580002	-0.454129	-0.693255	0.0521342	0.169242	-0.724717	-0.0213086	-2.21515
P28491	Calreticulin OS	-0.8765	0.528144	-1.02059	-0.187754	0.261004	0.509683	0.390101	0.70751	-0.777154	-0.53021	-0.669287	0.187754	0.460773	-0.980125	0.420648	-2.38904
F1SMN1	Uncharacterized protein OS	-1.62152	0.465118	-0.619208	-0.200124	0.143463	0.315661	0.52292	0.991764	-0.593957	-1.12751	-1.14074	0.195736	0.0150757	-0.0150757	0.448643	-2.69284
A0A286ZM82	Calumenin isoform X2 OS	-2.19039	0.227045	-1.04417	-0.129195	0.29274	0.46139	0.455255	0.791052	-0.802052	-1.48847	-1.73739	0.141756	0.0112383	-0.0112383	0.352276	-2.8443
F1SSH3	Calcium/calmodulin-dependent protein kinase type II subunit beta isoform X1 OS	-1.54948	0.450854	-1.03868	-0.0198485	0.336375	0.558971	0.39641	0.404251	-0.750117	-0.903538	-1.16091	0.201468	0.0198485	-0.470127	0.507796	-2.6365
Q95266	Calcium/calmodulin-dependent protein kinase type II subunit delta OS	-0.664017	0.57777	-0.658964	-0.0622788	0.123679	0.445607	0.195185	0.810521	-0.318989	-0.375892	-0.728723	0.0622788	0.463095	-0.194954	0.507594	-1.56617
A0A286ZKT1	Protein kinase domain-containing protein OS	-0.437211	0.352386	-0.305238	0.2943	-0.0216497	0.400044	0.151237	0.509468	-0.449829	-0.180823	-0.778108	0.0216497	0.315581	-0.0907837	0.231144	-1.88829
I3LU01	Uncharacterized protein OS	-0.201774	-0.209637	0.407378	0.692516	0.402229	1.22983	0.528906	0.487363	-0.952374	-0.990014	-0.969064	0.0728655	-0.0728655	-0.464584	0.330397	-2.81095
F1RGR1	Protein kinase domain-containing protein OS	-0.61657	0.240116	-0.61657	0.443551	0.352403	0.567308	-0.129196	0.317127	-0.74781	-0.84557	-0.95748	0.129196	0.158591	-0.64052	0.202282	-2.67581
A0A287AAY2	Calcium signal-modulating cyclophilin ligand OS	-0.753433	0.364977	-0.365363	-0.0256573	0.164104	0.576108	0.210497	0.385919	-1.14575	-1.11273	-1.42085	0.0256573	0.145121	-0.162546	0.487379	-2.21413
A0A286ZWR4	Uncharacterized protein OS	-0.920141	0.196967	-0.190621	0.0189193	-0.0189193	0.309808	0.220012	0.37502	-0.815312	-0.875747	-1.27629	0.0354232	0.129387	-0.137239	0.38793	-2.57298
I3LLX3	Uncharacterized protein OS	-0.246427	0.209326	-0.146306	0.264627	0.0496146	0.476412	0.115362	0.327363	-0.507705	-0.511923	-0.75274	-0.0496146	0.259687	-0.408029	0.146476	-2.87238
A0A287A9F3	Uncharacterized protein OS	-0.825152	0.213289	-0.322948	0.215734	-0.0113489	0.511778	0.264969	0.427793	-0.547116	-0.730316	-1.19889	0.0719869	0.0113489	-0.182704	0.182368	-2.65021
F2Z5R6	TIP120 domain-containing protein OS	-0.395522	0.400579	-0.272172	-0.0390012	0.0390012	0.357053	0.247932	0.687555	-0.909808	-0.703932	-1.43014	0.136849	0.543865	-0.353874	0.392444	-2.30393
F1SQ89	TIP120 domain-containing protein OS	-1.39471	0.794675	-1.33198	-0.364963	0.35542	0.928019	0.646766	1.21607	0.0921471	-0.0921471	-0.589647	0.42632	-0.259029	-0.468711	0.103541	-2.49425
A0A287BS07	Uncharacterized protein OS	-0.764532	0.277132	-0.249414	0.0617874	0.0877001	0.123508	-0.132176	0.651868	-0.165998	-0.0617874	-0.329857	0.130858	0.598795	-0.0718765	0.533749	-1.83437
A0A287AXF5	Uncharacterized protein OS	-0.540915	0.601213	-0.538601	-0.302403	0.021487	0.221756	0.307854	0.467167	-0.712868	-1.07246	-0.981649	-0.021487	0.607494	0.255482	0.982546	-2.08254
F1SMC0	Adenylyl cyclase-associated protein OS	-0.578212	0.286815	-0.394404	0.0191781	-0.0191781	0.194431	0.123075	0.303647	-0.794012	-0.478236	-1.14893	-0.0647406	0.450141	0.200863	0.320284	-2.10067
F1SVB0	Macrophage-capping protein isoform 1 OS	-1.24254	0.675731	-1.65283	-0.416937	0.150456	0.543226	0.401886	1.06214	-0.715878	-0.01811	-0.585604	0.01811	0.121615	-0.293423	0.364862	-2.2787
P35750	Calpain-1 catalytic subunit OS	-0.256037	0.337991	-0.0902867	0.0909113	0.164107	0.239827	0.0706579	0.282718	-0.3385	-0.56904	-0.433657	0.0949283	-0.0706579	-0.306359	0.267376	-2.25263
F1RGT8	Calpain-15 isoform X2 OS	-1.83516	0.152302	-1.48155	-0.564612	-0.130515	0.136156	0.037994	0.134972	-0.402991	0.170592	-0.037994	0.194867	0.894442	-0.123455	0.552615	-1.86243
I3LQD3	Calpain-2 catalytic subunit OS	-0.812676	0.493219	-0.556516	-0.114811	0.163991	0.495298	0.26126	0.41741	-0.682438	-0.654514	-0.90836	0.242819	0.114811	-0.119575	0.367215	-1.67775
P04574	Calpain small subunit 1 OS	-0.319766	0.540591	-0.293854	-0.227696	0.166002	0.378662	0.135122	0.673087	-0.512749	-0.173	-0.628684	0.101794	1.94841	-0.101794	0.540591	-0.868354
F1SGS6	Caprin-1 isoform 1 OS	-1.13234	0.500797	-0.351945	-0.00152345	0.287705	0.468131	0.443697	0.949619	-0.727349	-1.07987	-1.04802	0.10996	0.00152345	-0.0944296	0.45263	-2.38738
F1SBU1	Calcyphosin isoform a OS	-0.626224	0.634236	-0.716422	-0.230604	0.812723	1.1697	0.541127	0.881259	-1.11784	-0.636548	-0.887717	0.230604	0.703398	-0.887717	0.413096	-2.2035
Q29221	F-actin-capping protein subunit alpha-2 OS	-0.530695	0.545633	-0.436166	-0.137404	0.247481	0.418436	0.25409	0.478365	-0.481558	-0.429796	-0.69156	0.137404	0.432488	-0.146079	0.526107	-1.32167
A0A286ZU64	F-actin-capping protein subunit beta OS	-1.07922	0.555548	-0.549205	-0.126906	0.194019	0.513268	0.313403	0.621715	-0.871693	-0.748264	-1.14541	0.126906	0.373725	-0.202402	0.522891	-0.925928
A0A286ZVX0	Uncharacterized protein OS	-0.16852	0.0063625	-0.507532	-0.195588	-0.0063625	0.323532	0.249196	0.645715	-0.35734	0.36117	-0.0143735	0.0998677	0.579132	-0.443401	0.354964	-1.69566
I3LI18	Uncharacterized protein OS	-1.84182	0.34391	-1.16826	-0.354866	0.0630625	0.339981	0.17048	0.289301	-0.514065	-0.0630625	-0.191576	0.405284	0.59515	-0.26275	0.975359	-1.8014
A0A287A340	CARD domain-containing protein OS	-0.0185085	0.143459	-0.562978	-0.0805305	0.0185085	0.213544	0.242143	0.390714	-0.310397	-0.379804	-0.537169	0.185917	0.74324	-0.209114	1.12337	-2.78191
I3LCU9	CSD_1 domain-containing protein OS	-1.29562	0.278495	-0.370474	-0.0198095	0.523268	1.13779	0.473011	0.958266	-0.366213	-0.9353	-1.10247	0.401074	-0.0536775	0.0198095	0.168225	-2.21677
I3LS60	ATP-dependent (S)-NAD(P)H-hydrate dehydratase OS	-0.510349	0.230564	-0.552686	-0.0277476	0.23319	0.437102	0.0277476	0.669061	-0.682746	0.0472742	-0.251713	-0.0854626	0.753783	-0.532476	0.212051	-1.8257
A0A286ZVI7	Uncharacterized protein OS	-0.729589	0.395531	-0.182101	0.112917	0.244282	0.480065	0.317717	0.680818	-0.805537	-0.882962	-0.967687	-0.112917	0.277791	-0.352026	0.375035	-2.9332
F1RYA3	tRNA-synt_1e domain-containing protein OS	-0.386742	0.452322	-0.347214	-0.0252863	0.0252863	0.312464	0.121404	0.342992	-0.475583	-0.538745	-0.968701	0.0958191	0.520148	-0.0841793	0.515867	-1.49058
A0A287A2J3	Putative cysteine--tRNA ligase, mitochondrial isoform 1 OS	-0.796654	0.142684	-0.383739	0.0716305	0.0977365	0.335698	0.0529145	0.320129	-0.914492	-0.59379	-0.733015	-0.156196	0.663292	-0.0529145	0.38267	-1.55738
A0A287BL32	Btz domain-containing protein OS	-1.04126	0.174433	-0.478491	0.0193974	0.134773	0.442005	0.300359	0.689362	-0.884856	-1.01398	-1.06345	-0.0193974	-0.208947	0.110195	0.0889694	-2.69098
F1SN03	Uncharacterized protein OS	-1.7187	0.683405	-0.746609	-0.102241	0.193215	0.521541	0.492525	1.03153	-1.29115	-1.31755	-1.61214	0.102241	0.105084	-0.14382	0.690047	-2.17624
K7GSB2	Uncharacterized protein OS	-0.179253	0.356058	0.43273	0.590078	0.298463	0.576113	0.182599	0.345619	-1.30427	-1.17158	-1.49561	-0.126495	-0.0395885	-0.584047	0.0395885	-2.97271
A0A287BC09	Uncharacterized protein OS	-0.966645	0.487672	-0.426072	0.071875	0.378827	0.826368	0.591002	0.934827	-0.757693	-0.911495	-0.938805	0.273046	-0.071875	-0.170931	0.483107	-2.07693
A0A286ZZS2	Caspase-1 OS	-1.80367	-0.0951435	-1.09961	-0.586197	-0.0712125	0.281629	0.0403665	0.0946365	-0.0403665	0.305439	-0.321665	0.0752535	0.50136	0.253511	0.910661	-1.4961
I3LRE7	Uncharacterized protein OS	0.268947	0.406897	-0.999991	-0.66863	0.00591275	0.462665	-0.00591275	0.378751	-1.39545	0.278728	-0.564403	-0.0480822	0.896617	-1.13306	0.399071	-2.83269
A0A287AZZ1	Caspase-3 OS	-0.188415	0.375327	-0.893832	-0.354733	0.011884	0.0883969	-0.034427	0.796155	-0.402106	0.372882	0.133875	-0.011884	0.854282	-0.373085	0.11644	-1.49507
F1S131	Uncharacterized protein OS	-0.660253	0.612018	-0.0644835	0.101448	0.379862	0.21963	0.263176	0.0608985	-0.0608985	-0.264323	-0.310394	0.565235	-0.86691	-0.139995	1.48904	-0.90818
K9J6J4	Caspase-7 isoform X3 OS	-0.792415	0.630188	-1.0483	-0.24	0.228126	0.522322	0.188144	0.97052	-0.996539	0.0286665	-0.327228	-0.0286665	0.847574	-0.616068	0.304911	-1.11573
Q56VC3	Caspase-8 OS	0.549777	0.363247	-0.211475	-0.057368	-0.15887	0.398777	0.047088	0.901646	-0.661371	0.154917	-0.238514	-0.047088	0.532744	-0.801229	0.292151	-2.0217
F1SUV9	Uncharacterized protein OS	-0.492261	-0.0277178	-0.172935	0.492495	0.0277178	0.624216	0.40099	0.38928	-0.0788488	-0.0772228	-0.908745	0.223758	0.114203	-0.213428	0.114203	-2.54971
O62714	Extracellular calcium-sensing receptor OS	-1.45624	-0.125468	-1.35933	-0.389398	-0.153509	0.125468	-0.126884	0.199887	0.548621	0.129481	-0.347099	0.702343	0.527578	0.522582	1.05098	-1.67131
F6PU32	Calpastatin OS	-1.88975	0.588759	-0.935755	-0.134194	0.510877	1.01674	0.792464	1.38494	-1.09017	-1.4597	-1.60574	0.134194	-0.358077	0.25923	0.374288	-2.63074
P12675	Calpastatin OS	-0.107011	0.706612	0.158116	0.461808	0.575764	0.645781	0.796665	1.76841	-1.39921	-0.822447	-1.34144	-0.030855	-0.038612	-0.572297	0.030855	-2.97379
F1SGS9	Catalase OS	-1.04754	0.222551	-0.7716	-0.0942545	0.0906075	0.379384	0.512457	1.0215	-0.446169	-0.0906075	-0.565145	0.103403	0.375434	-0.0979115	0.625441	-1.21614
Q6RVA9	Caveolin-1 OS	-1.61984	0.82968	-0.755283	-0.236173	0.236173	0.628898	0.592539	1.04964	-0.349505	-0.904763	-1.22826	0.460604	-0.313515	0.288079	0.430958	-2.14405
A0A286ZZ97	Uncharacterized protein OS	-0.535881	0.637655	-0.584416	-0.0897239	0.289033	0.316929	0.321726	0.563655	-1.09292	-1.12193	-0.78897	0.0897239	0.286581	-0.930098	0.548388	-2.97058
I3LDR9	Uncharacterized protein OS	-1.5246	0.288465	-0.678834	-0.243317	0.314461	0.530438	0.371561	0.624692	-0.79971	-1.3091	-1.32297	-0.0550063	0.0828923	0.0550063	0.399286	-2.62414
F1RMM0	Uncharacterized protein OS	-1.07765	0.699432	-0.42444	-0.0074137	0.334642	0.414686	0.469257	0.681053	-0.83088	-1.24679	-1.05591	0.0074137	0.0821517	-0.260941	0.516666	-2.61339
F1S6Q8	Uncharacterized protein OS	-1.93172	0.626578	-0.088572	0.556256	0.631951	1.18711	0.910323	1.29096	-0.935237	-0.829007	-1.29788	0.088572	-0.097874	-0.663867	0.172753	-3.10226
A0A287B5B7	Uncharacterized protein OS	-1.62584	0.002019	-1.02302	-0.612939	-0.214231	0.12336	-0.002019	0.012632	-0.070274	0.045613	-0.154302	0.043974	0.068359	0.017502	0.262615	-2.56746
M3V828	Core-binding factor subunit beta isoform X2 OS	-0.85308	0.470614	-0.83841	-0.112582	0.112582	0.42633	0.463524	0.775468	-0.683486	-0.162893	-0.67043	0.174675	0.264434	-0.36471	0.407983	-1.95388
A0A286ZW04	Uncharacterized protein OS	-0.83051	-0.494562	-0.351058	0.203013	-0.0198043	0.62536	0.343757	0.0198043	0.363276	0.634839	0.0765548	0.240749	-0.626496	-0.490434	-0.528017	-3.18676
A0A286ZQE1	Uncharacterized protein OS	-0.351952	0.247011	-0.218291	0.0563544	0.0920487	0.377704	0.343757	0.438864	-0.473999	-0.325341	-0.759336	-0.0563544	0.137852	-0.161707	0.418764	-2.39875
A0A287AVY5	E3 ubiquitin-protein ligase CBL-B isoform X1 OS	-1.57169	0.0241969	-0.832255	-0.0874328	0.0802053	0.371731	0.267609	0.379193	-0.539172	-0.501492	-1.28555	0.0617763	0.175112	-0.0241969	0.56451	-2.27882
A0A287AIN4	RING-type domain-containing protein OS	-1.91359	0.513375	-1.38768	-0.0500419	0.363349	0.811961	0.505561	1.17985	-1.16114	-0.849195	-1.31077	0.0500419	0.425007	-0.175424	0.393903	-1.94996
Q28960	Carbonyl reductase [NADPH] 1 OS	-0.0929165	0.408298	-0.744992	-0.0392785	0.351869	0.287556	0.926085	1.44577	0.0392785	-0.815378	-1.28348	-0.349407	0.0721435	-0.409389	0.0866915	-2.21448
F1SGX4	Carbonyl reductase NADPH 3 OS	-0.0084617	0.260001	-1.05899	-0.35832	0.0594261	0.341285	0.104723	0.521071	-0.708546	0.395897	-0.19121	-0.0531217	0.0968317	-1.01843	0.0084617	-2.49077
F1RIX8	Carbonyl reductase family member 4 OS	-0.725397	0.433557	-0.717223	-0.052115	0.072559	0.171256	0.011568	0.886634	-0.640508	-0.011568	-0.450119	0.056757	0.975883	-0.279943	0.506333	-1.76417
A0A287A675	Cystathionine beta-synthase OS	-0.168736	0.200169	0.123921	0.0609255	0.640657	0.873492	0.143774	0.226784	-1.16175	-1.03354	-1.29122	-0.0609255	-0.247561	-0.917139	0.143929	-2.91655
F1RWH1	Uncharacterized protein OS	-1.43815	0.488513	-0.799519	-0.117064	0.381768	0.722868	0.5848	0.902167	-0.617041	-0.529298	-1.02416	0.327137	0.117064	-0.863036	0.354104	-3.202
F1ST98	Chromobox protein homolog 3 isoform X1 OS	-0.676631	0.455329	-0.877632	-0.349136	0.367071	0.652883	0.444879	0.854956	-0.702212	-0.172491	-0.291698	0.172491	0.343511	-0.989712	0.342261	-2.89818
F1RZ78	Chromo domain-containing protein OS	-1.65222	0.108806	-0.755872	-0.518808	-0.00725999	0.402737	0.155799	0.487613	0.057479	-0.044771	-0.305362	0.00725999	0.695858	-0.073584	0.742652	-2.97322
F2Z5T3	Chromobox homolog 5 tv3 OS	-0.706698	0.619564	-0.455918	0.0340595	0.42908	0.770377	0.424134	0.971883	-1.05118	-0.378276	-0.344128	-0.0340595	0.770377	-0.967566	0.354365	-3.08956
A0A286ZRM0	Chromo domain-containing protein OS	-1.19964	1.07458	-0.374568	0.794104	0.809067	1.52025	0.838536	1.19339	-1.06868	-1.01279	-1.2913	-0.0028545	0.0028545	-0.470744	0.311364	-2.5773
F1SNY1	Chromobox protein homolog 7 isoform 1 OS	-1.18174	0.345361	-0.617346	0.0254973	0.340631	0.748544	0.167148	0.599118	-0.207495	-0.360845	-0.692921	0.198857	-0.0254973	-0.605886	0.0931474	-2.73974
A0A287AF83	Chromobox protein homolog 8 OS	-0.860169	0.415816	-0.884599	-0.017866	0.0103793	0.638844	0.246169	0.567597	-0.0103793	-0.189856	-0.906668	0.0133205	0.025026	-0.252066	0.17965	-2.81773
A0A287AAX8	Coiled-coil and C2 domain containing 1A OS	-1.14151	0.121785	-0.565842	0.0546103	-0.0315049	0.441395	0.16614	0.494047	-0.620768	-0.660057	-1.1292	0.0315049	0.197008	-0.130734	0.172367	-2.52497
F1S6H6	Uncharacterized protein OS	-1.2728	-0.0834595	-0.232893	0.104356	0.174422	0.379754	0.418405	0.38534	-0.361695	-0.86217	-0.918859	0.0406564	0.0364027	-0.0364027	0.300383	-2.53443
F1SUH2	SAP domain-containing protein OS	-0.563208	0.157802	-0.272943	0.103598	0.0070652	0.596707	0.290807	0.437835	-0.644811	-0.559039	-1.34112	-0.0070652	0.0837354	-0.556958	0.228251	-2.29531
F1RMA3	DBC1 domain-containing protein OS	-0.714906	0.313468	-0.439055	-0.0250466	0.0250466	0.475089	0.242101	0.538127	-0.78119	-0.453533	-1.02814	0.0763413	0.406883	-0.122487	0.470714	-1.8589
F1SMU0	EGF-like domain-containing protein OS	-0.819421	0.294823	-1.29632	0.0166531	0.236906	0.460216	0.36233	0.694351	-0.756685	-0.195797	-0.337816	0.348128	-0.133024	-0.0166531	0.393783	-2.40438
I3LHY5	Coiled-coil domain-containing protein 102A isoform X1 OS	-1.3153	0.237414	-0.354085	0.0376708	0.254273	0.662526	0.544131	0.862681	-0.492178	-1.05674	-1.21551	0.220356	-0.220876	-0.0376708	0.176127	-2.49868
A0A286ZWQ5	Uncharacterized protein OS	-0.491687	0.288562	0.196116	0.223139	0.278578	0.597067	0.281438	0.663242	-1.29337	-1.19385	-1.46527	-0.269094	-0.0844985	-0.882827	0.0844985	-3.06266
F1SG03	Coiled-coil domain-containing protein 107 isoform B OS	-1.86046	-0.103133	-1.19485	-0.700465	0.064992	0.245567	0.264199	0.298504	0.13361	-0.209277	-0.064992	0.086016	0.445795	-0.362258	0.381538	-2.95211
A0A287A361	Coiled-coil domain-containing protein 115 OS	-0.154986	0.271279	-0.904249	-0.412021	0.150822	0.426633	0.00749845	0.443274	-0.464858	-0.00749845	-0.125238	0.237332	0.13725	-0.440231	0.368576	-2.26602
A0A287AY70	Uncharacterized protein OS	-1.70195	0.113361	-0.339638	0.0960666	0.0772078	0.412095	0.351722	0.595573	-0.462374	-0.658402	-1.21985	-0.142024	0.251946	-0.0772078	0.548425	-2.59437
F1SNV1	Uncharacterized protein OS	-1.88954	0.22197	-0.770894	0.0146013	0.164814	0.642066	0.41789	0.651835	-0.728802	-1.23419	-1.35349	-0.0146013	-0.422632	0.106592	0.344218	-3.25064
K7GMJ0	DUF3338 domain-containing protein OS	-0.815146	0.136615	-0.547254	0.0524509	0.0430868	0.381295	0.177537	0.478777	-0.521223	-0.459078	-0.619767	0.0670428	-0.0228141	-0.330067	0.0228141	-2.60077
F1RJX7	Uncharacterized protein OS	0.039365	0.565849	0.51971	0.096164	0.477575	0.735774	-0.039365	0.763189	-1.21485	-1.13002	-1.57091	-0.143959	-0.302966	-1.0683	0.190381	-3.12872
F1S924	Uncharacterized protein OS	-0.93109	0.36933	-0.337004	0.023994	0.266695	0.60528	0.415637	0.896602	-0.538335	-0.86842	-0.775125	0.266695	-0.0486	-0.023994	0.484712	-2.8281
A0A286ZZT8	Coiled-coil domain-containing protein 126 isoform X1 OS	-0.759419	0.0614119	-0.276251	0.148173	0.185576	0.603005	0.27954	0.491277	-0.239066	-0.0614119	-0.104235	0.103998	-0.692544	-0.105907	0.115529	-3.3183
A0A286ZUD3	Uncharacterized protein OS	-0.330533	0.359612	-0.219726	0.21621	0.429285	0.769003	0.176951	0.240896	-0.946129	-0.673322	-0.885499	0.027315	-0.082393	-0.027315	0.657292	-2.35088
A0A287A6Q1	Uncharacterized protein OS	0.125538	-0.180942	-0.586337	-0.0195785	-1.65582	-1.28903	0.0649178	0.490713	-0.101233	0.23708	0.0195785	0.269928	0.256122	-0.684581	0.277403	-2.49435
A0A287BKK7	Uncharacterized protein OS	-1.84715	0.514462	-1.33085	0.0654771	0.279339	1.09494	0.709761	0.69996	-0.681702	-0.84715	-1.4093	0.31059	-0.220641	-0.0654771	0.575769	-2.24127
A0A287BSM4	Uncharacterized protein OS	-0.645224	0.343654	-0.515801	0.0055095	0.13873	0.514268	0.326182	0.854377	-0.460602	-0.506826	-0.563857	0.231481	-0.0055095	-0.158742	0.29701	-2.45628
F1SN15	Uncharacterized protein OS	-1.69924	0.451587	-0.862455	-0.105343	0.459351	0.578346	0.527673	0.42367	-0.710695	-0.818154	-0.904104	0.266991	0.105343	-0.450354	0.343519	-2.64262
A0A287AUD4	Uncharacterized protein OS	-0.9828	0.178749	-0.00519	0.192438	-1.02794	-0.475076	1.18256	1.29329	-0.061843	-0.484726	-0.584953	0.274816	0.00519	0.336395	0.69164	-2.31158
A0A287B1H8	Uncharacterized protein OS	-0.344632	0.00369355	-0.251991	-0.00369355	0.0811531	0.247194	0.0978158	0.392709	-0.776653	-0.779186	-0.739179	0.0357549	0.104702	-0.205253	0.294941	-2.95419
F1S5H4	Uncharacterized protein OS	-1.31603	0.400321	-0.656844	-0.105384	0.146804	0.521694	0.172556	0.639811	-0.985266	-1.07476	-1.35404	0.105384	0.320299	-0.438777	0.361398	-2.70963
F1SSL9	Uncharacterized protein OS	0.0141023	0.0379493	0.341364	0.0260753	0.0047213	0.331749	-0.0047213	0.317748	-0.112886	-0.237755	-0.400935	0.0300443	-0.212526	-0.535236	-0.139385	-2.74983
F1RW40	Coiled-coil domain-containing protein 22 OS	-0.328227	0.809276	-0.805024	-0.267686	0.279906	0.555952	0.267686	0.658314	-0.759848	-0.28959	-0.737779	0.318594	0.564858	-0.410932	0.648922	-1.43514
A0A286ZY28	NFACT-R_1 domain-containing protein OS	-2.11379	0.361341	-0.662542	0.0394126	0.0726716	0.27482	0.348363	0.665939	-1.16249	-1.67795	-1.88712	0.0805406	-0.0394126	-0.052262	0.281663	-2.59205
F1S6Y0	Uncharacterized protein OS	-0.813143	0.0402442	-0.273214	0.112049	0.171427	0.407055	0.164949	0.481934	-0.0116467	-0.349068	-0.382839	0.194511	-0.0563618	-0.276737	0.0116467	-2.74324
F1SF94	Uncharacterized protein OS	-0.769677	0.190217	-0.006716	0.428423	0.059227	0.230323	-0.054103	0.042725	-0.328337	-0.595363	-0.526908	0.039164	0.006716	-0.268279	0.14234	-2.47167
A0A287BDV1	Uncharacterized protein OS	-0.288577	0.32012	0.425994	-0.0209912	0.0360837	-0.0323959	-0.128562	0.587445	-0.286869	0.32236	0.0617863	-0.054026	0.0209912	-0.613071	0.0751324	-2.89073
A0A287AZ49	DUF4200 domain-containing protein OS	1.8299	1.8714	-0.0554785	1.27126	2.08178	1.30483	1.39568	1.17193	-1.19416	-1.00212	-1.74636	-0.208021	-0.183533	-0.875774	0.0554785	-3.49989
F1RQZ4	Coiled-coil domain-containing protein 43 isoform 1 OS	-1.78266	0.716099	-0.871932	-0.406372	0.585827	0.764294	0.839331	1.15317	-1.05496	-1.12274	-1.39972	0.528841	0.406372	-0.868862	0.948521	-3.28901
I3LAE8	Coiled-coil domain-containing protein 47 OS	-0.707334	0.634061	-1.21415	-0.65915	0.516613	0.717538	0.57037	1.02745	-0.940198	-0.386495	-0.66707	0.269342	0.574854	-0.269342	0.738673	-2.24148
A0A286ZUX4	CCDC50_N domain-containing protein OS	-2.04656	0.501367	-1.1824	-0.01207	0.398905	1.02082	0.610797	1.09351	-1.00397	-0.981565	-1.5181	0.0684077	0.01207	-0.332376	0.594903	-3.10767
A0A287BGX6	Coiled-coil domain-containing protein 51 isoform 1 OS	0.0529598	0.561623	-0.764861	-0.662118	0.171642	0.271443	0.123144	0.707649	-1.18583	-0.590717	-0.78272	-0.0529598	0.918115	-0.917146	0.601507	-1.90592
I3LE14	Coiled-coil domain-containing protein 58 OS	-0.417144	0.0555156	-0.578357	-0.0555156	0.292878	0.603887	0.342522	0.692945	-0.550206	-0.212106	-0.377444	0.202012	0.49665	-0.725367	0.337508	-2.09394
A0A287ANT3	Thyroid transcription factor 1-associated protein 26 OS	-0.882171	0.308094	-0.132387	0.403606	0.408399	0.740341	0.39518	0.726974	-0.413987	-0.724327	-1.01063	0.132387	-0.403449	-0.167619	0.262497	-3.0332
F1RG04	Uncharacterized protein OS	-0.713818	0.454418	-0.863012	-0.0971475	0.270914	0.454418	0.358979	0.690741	-0.241103	-0.526562	-0.723978	0.225441	0.0971475	-0.335308	0.476768	-2.46775
F1RM23	Coiled-coil domain-containing protein 61 isoform X1 OS	0.518347	0.610465	0.573382	0.555665	0.445822	0.496227	0.083252	0.613894	-1.15487	-1.21656	-1.56209	-0.083252	-0.337975	-0.731823	-0.136256	-3.19017
F1SB32	Uncharacterized protein OS	-1.25928	0.359629	-0.893851	0.0537878	0.280828	1.02989	0.455806	0.809004	-0.485973	-0.53414	-0.545315	-0.0253668	0.0253668	-0.283403	0.188056	-2.9671
A0A287A2N1	Uncharacterized protein OS	-0.736485	2.15385	-0.606085	0.162585	0.912044	1.17473	0.083815	2.46769	-0.742995	-1.19105	-0.083815	1.82775	-0.660535	-0.999515	3.99682	-3.03904
A0A287BR87	Coiled-coil domain-containing protein 8 OS	-0.437769	0.291839	-0.118135	-0.0084665	0.602938	0.824692	0.36729	0.783969	-0.463221	-0.852041	-0.720665	0.0084665	0.123296	-0.472589	0.358073	-2.69029
A0A287ALS1	Uncharacterized protein OS	0.0248765	0.439445	0.235698	0.452058	0.844242	0.82713	0.724594	1.03702	-1.14837	-1.02956	-1.38519	-0.0848485	-0.199147	-0.533869	-0.0248765	-3.22684
F1RU25	Uncharacterized protein OS	-1.21439	0.79724	-0.128758	1.07075	0.908653	1.45783	1.10338	1.42072	-0.783455	-0.693735	-1.3996	0.128758	-0.147123	-0.370736	0.481853	-2.59781
A0A287BCU3	Uncharacterized protein OS	-1.02462	0.206647	-0.187885	0.140676	0.38036	0.62988	0.335966	0.609941	-0.209656	-0.720618	-0.749764	0.111259	-0.0976873	-0.394847	0.0976873	-2.82015
F1RIC1	Coiled-coil domain-containing protein 86 OS	-1.47205	0.241547	-0.584202	0.0108042	0.305889	0.734266	0.350636	0.628283	-0.893765	-1.3422	-1.32045	-0.0108042	-0.334911	0.0221977	0.408219	-3.08526
F1SQK4	Girdin isoform 1 OS	-2.30574	0.552984	-1.24599	-0.138209	0.575565	0.931952	0.86259	0.830295	-1.02902	-1.48919	-1.92337	0.122694	-0.106604	0.106604	0.605451	-2.71839
F1SD91	Uncharacterized protein OS	-0.726015	0.352126	-0.198338	-0.018303	0.018303	0.39391	0.373169	0.684738	-0.31032	-0.45336	-0.669229	0.021443	0.201092	-0.185611	0.137402	-2.37283
A0A287ABU0	Uncharacterized protein OS	-1.88493	0.274426	-0.900813	-0.0911788	0.18571	0.426429	0.378981	0.673463	-0.768643	-0.914184	-1.31054	0.103174	-0.146912	0.0911788	0.406131	-1.9606
F1STU7	Coiled-coil domain-containing protein 90B, mitochondrial isoform 1 OS	-1.11191	0.715247	-1.03741	-0.066112	0.572582	0.707733	0.349328	0.574649	-0.363692	-0.62554	-0.896187	0.066112	0.591078	-0.993883	0.733863	-1.9726
A0A286ZKC4	Coiled-coil domain-containing protein 91 isoform 1 OS	-1.59311	0.343367	-0.84994	-0.112445	0.395752	0.861069	0.312895	0.672699	-0.737731	-0.974509	-1.2266	0.365236	0.112445	-0.202694	0.244991	-2.51114
A0A287BFJ0	Coiled-coil domain-containing protein 92 isoform X1 OS	-0.278818	-0.0399775	-0.557586	0.236694	0.0399775	0.439565	0.0673165	0.555553	-0.421809	-0.359257	-0.225066	0.0697755	0.268093	-0.453249	0.230112	-2.77872
A0A287ATN9	KOG2701 domain-containing protein OS	-0.935617	0.481468	-0.908549	-0.190478	-0.0927908	0.270287	0.0927908	0.454617	-0.835353	-0.777887	-1.35066	0.259587	0.343044	0.25121	0.344169	-1.46826
F1RH83	Coiled-coil domain-containing protein 97 isoform 1 OS	-1.01891	0.273059	-0.567273	-0.0246217	0.0411255	0.305299	0.0246217	0.579299	-0.502055	-0.613884	-0.445395	0.0829066	0.0411255	-0.247014	0.237697	-2.822
F1SS33	Uncharacterized protein OS	-2.11431	0.495803	-1.05049	-0.041853	0.410195	0.856393	0.767716	1.22061	-0.337309	-0.660825	-0.802573	0.281108	-0.076745	0.041853	0.347095	-2.66347
F1RTI5	Coiled-coil alpha-helical rod protein 1 OS	-1.84517	-0.0466845	-1.63101	-0.697163	-0.0991285	0.165556	0.223726	0.0466845	-0.105968	0.131306	0.134592	0.10976	0.363302	-0.373663	0.491865	-2.65644
A0A2C9F3A0	Cholecystokinin OS	-0.840726	0.876285	-0.011542	0.011542	0.784075	0.597815	0.701805	1.08355	-1.40376	-0.078045	-0.876813	-0.476098	0.367955	-0.35306	0.745665	-3.07553
A0A287BE47	C-C motif chemokine OS	-0.0572836	0.341864	-0.0636187	-0.00911185	0.415445	0.413166	-0.0431316	0.312816	-1.07797	-0.0940937	-1.17751	0.00911185	0.497338	0.175679	0.460288	-0.858332
A0A287BRD6	C-C motif chemokine OS	-1.28373	0.245203	-1.55503	-0.883756	0.444972	0.352767	0.0715398	1.27285	-0.333281	-0.0715398	-0.486578	0.344306	0.0991033	-0.784977	0.469634	-2.1582
F1S3U4	C-C motif chemokine OS	0.569445	1.17757	-0.053641	0.517938	0.460332	1.12028	0.906858	1.13788	-1.24511	-1.05895	-1.56735	-0.070872	0.013837	-0.856462	-0.013837	-3.0761
Q5K4L1	Putative CCL21 chemokine OS	-0.423237	0.607837	-0.4642	0.527698	0.365731	0.541559	0.340845	1.0013	-0.480449	-0.292481	-0.562088	-0.346771	0.292481	-0.55962	0.584594	-3.05147
F1ST61	Cerebral cavernous malformations 2 protein isoform 1 OS	-1.86654	0.075175	-1.14831	-0.471251	-0.075175	0.155585	0.188157	0.105139	-0.535937	-0.711284	-1.5883	0.397594	0.296336	0.473506	1.03087	-1.85921
F1SEX1	Uncharacterized protein OS	-0.885949	-0.101314	-0.664362	-0.449238	0.140574	0.101314	0.263798	0.29147	-0.964105	0.300165	-0.225953	0.303875	0.807538	-0.612154	0.428067	-2.51091
A0A287A0A9	CCN family member 2 OS	-0.421175	0.623622	-0.828838	-0.416744	0.596471	0.557584	0.0256915	0.762006	-0.814188	-0.0789715	-0.723813	-0.0256915	1.04108	0.0578955	0.396919	-1.28166
D2IE28	Cyclin B1 transcript variant 1 OS	-1.43763	0.681442	0.0610905	0.966051	0.719916	0.937063	0.663856	0.744578	-0.911119	-0.997328	-1.33141	0.0980045	-0.0610905	-1.02685	-0.0829665	-2.67926
A0A286ZQB6	CYCLIN domain-containing protein OS	-2.51326	0.617673	-1.51807	-0.168429	0.553693	1.31117	0.932999	1.0773	-0.909182	-1.38013	-1.63879	0.403856	0.089231	-0.089231	0.627521	-2.21851
F1S0D2	Uncharacterized protein OS	-1.70783	0.127594	-0.205649	0.199414	0.0599075	0.742303	0.494498	0.540376	-0.699812	-0.839722	-1.86043	0.104874	-0.0719375	-0.0599075	0.60872	-2.33635
I3L5S3	Cyclin-Y-like protein 1 isoform 3 OS	-0.262647	0.647846	0.581587	0.439179	0.482859	0.807742	0.458451	0.695035	-1.18463	-1.32225	-1.62801	-0.118544	-0.320597	-0.710771	0.118544	-2.97384
A0A287B520	Centriolar coiled-coil protein of 110 kDa isoform X1 OS	-0.335057	0.0907698	-0.496297	0.11441	0.192267	0.387524	0.0567222	0.285867	-0.799913	-0.166388	-0.357837	-0.0567222	0.489948	-0.699511	0.276035	-2.87186
A0A287BLW1	Uncharacterized protein OS	-1.47299	1.2529	-1.17733	-0.195879	0.859087	0.652896	1.0094	1.51494	-1.4958	-1.19122	-1.32269	0.330319	0.08148	-0.08148	1.2244	-1.07503
A0A286ZIZ7	Copper chaperone for superoxide dismutase OS	-0.886721	0.448722	-0.99233	-0.403316	0.23527	0.408945	0.0481841	0.740062	-0.83668	-0.0481841	-0.586453	0.0774783	1.12033	-0.593362	0.324719	-1.19108
I3LM56	Serine-rich coiled-coil domain-containing protein 2 isoform 1 OS	-1.23902	0.656768	-0.445954	0.451174	0.925362	1.35008	0.863961	1.2083	-0.494616	-0.704688	-0.52715	0.054434	-0.054434	-0.140872	0.105934	-2.40584
D0G0C8	Chaperonin containing TCP1, subunit 2 (Beta) OS	-0.486331	0.516753	-0.684573	-0.143562	-0.0646195	0.50023	0.125142	0.667729	-0.720433	-0.679858	-1.08786	0.0646195	0.331862	0.161061	0.36418	-2.05696
A0A287AMZ2	T-complex protein 1 subunit gamma OS	-0.29678	0.616984	-0.664378	-0.242026	-0.019349	0.457035	0.236276	0.820286	-0.789669	-0.240038	-0.643201	0.019349	0.810726	0.146401	0.672934	-1.57394
F1SQN1	T-complex protein 1 subunit delta OS	-0.607005	0.253109	-0.56016	0.0170995	-0.004689	0.68315	0.294479	0.662561	-0.293673	-0.280324	-0.652963	0.179108	0.004689	-0.041215	0.33841	-2.29559
I3LR32	T-complex protein 1 subunit epsilon OS	-0.48356	0.61477	-0.616097	-0.297147	0.046085	0.609479	0.269149	0.783051	-0.676851	-0.497191	-0.915278	0.129765	0.510776	-0.046085	0.705831	-2.00007
I3L9J4	Uncharacterized protein OS	-0.373402	0.396672	-0.686234	-0.068752	-0.143667	0.457076	0.288207	0.54943	-0.665057	0.068752	-0.910855	0.17386	0.696783	-0.369114	0.571903	-2.48032
D0G0C9	T-complex protein 1 subunit eta OS	-0.538867	0.551157	-0.43704	-0.161591	0.0993813	0.388218	0.168437	0.605086	-0.175787	-0.0993813	-0.758968	0.288338	0.394237	-0.215563	0.327866	-2.532
I3LCA2	Uncharacterized protein OS	-0.273875	0.573906	-0.477644	-0.0953582	0.0953582	0.494166	0.337982	0.696741	-0.53691	-0.183678	-0.676043	0.227255	0.424176	-0.353603	0.311087	-2.11955
K7GKY0	CD109 antigen isoform 1 preproprotein OS	-0.0230127	0.162342	-0.0143129	0.0409911	0.0807827	0.432182	0.0143129	0.483247	-0.294215	-0.802284	-0.65078	-0.0869447	0.20021	-0.0673159	0.228584	-2.07031
A2SW51	Monocyte differentiation antigen CD14 OS	-0.322773	0.147474	-1.1583	-0.713867	0.650556	0.746964	0.120373	0.419664	-0.311075	0.136125	-0.590905	-0.120373	0.235186	-0.167055	0.757186	-2.28605
F1RMW7	Uncharacterized protein OS	-0.633141	0.00804999	-1.1879	-0.797524	-0.441189	0.560025	0.188413	0.409234	-0.573359	0.060454	-1.02251	-0.00804999	1.14862	1.61128	0.859206	-0.622085
A0A287BCW0	T-cell surface antigen CD2 isoform 2 OS	-1.45261	0.471442	-1.55314	0.373123	0.110611	0.143102	0.317271	0.951986	-0.621668	-0.438804	-1.87383	-0.119626	-0.0152045	0.0152045	0.797264	-1.36733
A0A287A9T6	OX-2 membrane glycoprotein isoform X2 OS	0.0924115	0.452801	0.0348965	-0.151385	0.0726655	0.220188	-0.180709	0.0776275	-0.688527	0.199852	0.0104545	-0.325489	-0.0104545	-0.678035	-0.23197	-3.02102
B3FVQ2	CD209 OS	-1.8294	0.55819	-1.00796	0.209978	0.2457	0.727763	0.633031	0.90784	-0.242604	-1.14858	-1.35503	0.317086	-0.596038	-0.209978	0.281834	-3.16238
K7GPF5	C-type lectin domain-containing protein OS	-0.75957	0.165436	-0.842033	-0.0598566	0.107163	0.380716	0.0598566	0.490836	-0.666019	-0.574015	-1.09214	0.114899	0.461811	-0.757215	0.269599	-2.08032
F1SIC6	Uncharacterized protein OS	-0.787774	0.365861	-0.50147	0.0131026	0.0374222	0.374871	0.204666	0.477771	-0.836337	-0.961159	-1.17461	-0.0131026	0.124134	-0.168046	0.474632	-1.72868
F1RQ14	CD2-associated protein OS	-0.710173	0.412296	-0.743458	-0.149029	0.184857	0.483737	0.472631	0.868871	-0.853764	-0.498669	-0.4556	0.2974	0.149029	-0.839852	0.456937	-2.69507
F1RG67	CD2 antigen cytoplasmic tail-binding protein 2 OS	-1.40274	0.28806	-0.226513	0.136057	0.292744	0.458246	0.422361	0.460329	-0.612248	-1.3075	-0.816511	0.0937391	-0.0937391	-0.27075	0.240364	-2.9103
A0A287A3D8	Uncharacterized protein OS	-1.14075	0.46384	-0.170704	0.0313679	0.268097	0.485341	0.220171	0.49809	-0.525369	-0.758191	-0.887632	0.40639	-0.0313679	-0.311912	0.0872767	-2.64875
I3LDT1	DNA-directed RNA polymerase I subunit RPA34 isoform 1 OS	-1.29798	0.299349	-0.59268	0.130964	0.139247	0.581557	0.45012	0.644013	-0.39433	-0.489035	-0.757185	0.353751	-0.130964	-0.225291	0.260642	-2.95166
K7GM14	Link domain-containing protein OS	-1.18193	0.307727	-1.07407	0.0917712	-0.10029	0.311242	0.527101	0.642268	-1.28076	-1.21525	-1.75214	0.0333882	-0.0333882	0.0460994	0.574666	-2.37175
A0A287BNV5	Leukocyte surface antigen CD47 OS	-0.895742	1.35721	-1.08187	0.055633	0.631248	0.779206	0.81648	1.03179	-1.24487	-0.952512	-1.16454	0.128067	-0.055633	-0.626892	0.252921	-2.94414
F1RJY9	CD48 antigen isoform X1 OS	0.775718	1.2375	-1.19261	-0.992914	0.052116	-0.00884001	0.429577	-0.405612	-1.02854	0.00884001	-0.455652	0.094131	0.965132	-0.51758	1.39033	-1.95815
A0A287B6Q2	Uncharacterized protein OS	0.271973	0.478873	-0.209751	-0.138577	0.0774	0.474486	0.355464	0.057983	-1.63029	-1.65571	-2.24068	0.311865	-0.51239	-0.057983	0.217006	-2.32994
F1SAX5	Uncharacterized protein OS	0.024743	0.693856	-0.514582	-0.532366	-0.10065	0.0755263	0.332924	0.325538	-1.23617	-0.658507	-1.1376	-0.024743	0.947458	0.185688	0.808671	-1.18957
O62680	CD59 glycoprotein OS	0.0634892	0.401248	-1.27591	-0.594179	0.380489	0.568626	-0.246909	0.837596	-0.805203	0.258123	0.207948	-0.288781	0.783278	-1.26497	-0.0634892	-1.313
A0A287AE58	Uncharacterized protein OS	0.0796655	0.852386	-0.265517	-0.123922	-0.308996	-0.173817	0.416775	0.601143	-0.0309395	0.265864	-0.754551	-0.0463495	0.0309395	0.814501	1.3805	-1.29743
Q95JH1	Integrin beta OS	-1.50856	0.194149	-1.03376	-0.267149	0.055977	0.510423	0.292987	0.592048	-1.76133	-2.08681	-1.6852	-0.055977	0.768093	1.97741	1.75573	-0.266793
F1ST28	Macrosialin isoform A OS	0.386975	0.481052	-0.607401	0.183014	0.113193	0.371393	0.046971	-0.046971	-1.02057	-1.24234	-2.13729	0.230896	-0.391438	-0.129209	0.328022	-1.3184
A0A287AN01	Uncharacterized protein OS	-0.0457635	0.789383	-0.290624	0.0139435	0.185311	0.350098	0.492157	0.798844	-0.276648	-0.0139435	-0.65119	0.183868	-0.274662	-0.216323	0.512999	-2.41415
A0A287B7S0	Thyroglobulin type-1 domain-containing protein OS	-0.0140706	0.003686	-0.426629	-0.452624	0.0110205	0.320605	0.364785	0.611506	-0.232251	0.328846	-0.136762	0.32532	0.0655767	-0.426629	-0.003686	-2.8259
K7GMU1	T-lymphocyte activation antigen CD86 isoform 1 OS	-0.113753	0.00147815	-0.00147815	0.254139	0.194677	0.388936	0.207535	0.354666	-0.228564	-0.357089	-0.399355	-0.00147815	-0.21306	0.0292653	0.307668	-2.61785
B9ZSM8	CD90 protein OS	0.148345	0.717265	-0.42504	-0.595474	0.0739842	0.0868848	-0.15659	-0.0507613	-0.447599	-0.437301	-0.894682	0.0507613	0.280243	0.455152	0.610137	-1.86678
F1SAT8	Complement component C1q receptor OS	-0.101209	0.442962	-0.297606	0.014672	0.051319	0.497098	0.132382	0.620992	-0.558238	-0.494838	-0.607065	-0.014672	0.82709	-0.147408	0.0824459	-1.28563
A0A287AEV6	CD99 molecule (Xg blood group) OS	-1.53466	0.644714	-0.536917	-0.0666808	0.0666808	0.274612	0.202298	0.699236	-0.389422	-0.499154	-0.543685	0.209024	-0.310351	0.14593	0.460831	-2.86109
F1RQ20	Uncharacterized protein OS	-0.361282	0.346537	0.0762884	-0.158874	0.120323	0.122872	0.00207985	0.540136	-0.948919	-0.875855	-0.69888	0.024064	0.458739	-0.592608	-0.00207985	-2.96778
I3LAH9	Cytidine deaminase OS	-0.776141	-0.288824	-0.0783506	0.737373	-0.0270486	0.340761	0.272018	0.743849	0.0436402	0.0270486	-0.88326	-0.681378	0.330963	-0.530863	0.079191	-1.93552
A0A287AH86	Uncharacterized protein OS	-1.78525	0.254277	-0.865064	-0.058844	0.489839	0.677819	0.520557	0.615628	-0.73843	-0.624259	-1.22725	0.142856	0.058844	-0.392934	0.312781	-2.24781
A0A286ZWQ3	Uncharacterized protein OS	-1.08015	0.422352	-0.247605	-0.105066	0.369066	0.634913	0.447704	0.948389	-0.723078	-0.411992	-0.675026	0.308714	0.105066	-0.874796	0.554456	-3.06052
A0A287BI65	Uncharacterized protein OS	-1.90472	1.16585	-0.390922	0.30827	0.943915	0.998562	0.86013	0.980924	-0.913494	-0.984035	-1.26407	0.0901395	-0.0901395	-0.824574	0.0995145	-2.90313
A0A287BPQ6	UBIQUITIN_CONJUGAT_2 domain-containing protein OS	-0.595789	0.199194	-0.619286	0.00539755	0.349584	0.790412	0.365233	0.693612	-0.277127	-0.00539755	0.193811	0.323941	-0.0100485	-0.66257	-0.0751676	-3.16914
Q684M6	CDC37 cell division cycle 37 protein OS	-1.00213	0.463482	-0.420133	-0.0672711	0.0672711	0.312075	0.268537	0.459185	-0.816166	-0.795482	-1.129	0.068682	0.50472	-0.210519	0.421031	-1.63528
A0A287BRV6	CDC37_M domain-containing protein OS	-0.662762	0.926592	-0.103339	0.400216	0.683388	1.11841	0.71295	0.935341	-1.35033	-0.778352	-1.29605	0.103339	-0.19308	-0.741402	0.135587	-3.24662
F1RSY9	Pre-mRNA-processing factor 17 OS	-0.557965	0.472593	0.0284681	0.119556	-0.0284681	0.0401735	0.140098	0.157667	-1.21067	-1.15623	-1.48485	-0.129752	0.646352	-0.137972	0.882492	-2.06562
Q007T2	Cell division control protein 42 homolog OS	-0.522112	0.787937	-0.61231	-0.184327	0.248406	0.611646	0.468859	1.03952	-0.889095	-0.283282	-0.717335	0.06713	1.08074	-0.06713	0.694759	-0.427557
A0A287B767	Non-specific serine/threonine protein kinase OS	-0.311331	0.243405	0.0243369	0.114452	0.202897	0.526274	0.159975	0.283949	-0.628521	-0.823933	-1.05002	-0.0243369	-0.052906	-0.429976	0.074067	-2.55926
A0A287AEG0	Uncharacterized protein OS	-0.493925	0.451758	-0.335133	-0.096002	0.118004	0.571487	0.0788881	0.326334	-0.575587	-0.672382	-1.14147	0.328901	0.385484	-0.0788881	0.654671	-1.95506
F1RQR3	Uncharacterized protein OS	-0.224982	0.316224	-0.0840795	0.219525	0.0763851	0.380253	-0.0763851	0.138533	1.55142	0.95774	0.938881	-0.36794	-0.719283	-0.950087	-0.672132	-2.88682
I3LT56	Cdc42 effector protein 1 isoform X1 OS	-0.490033	0.265186	-0.317125	0.0087725	0.247828	0.667895	0.321157	0.595847	-0.268281	-0.463398	-0.29935	0.227537	-0.0087725	-0.118778	0.297991	-2.49903
F1RQV5	Cdc42 effector protein 2 OS	-0.23899	0.363046	-0.191922	0.333652	0.186589	0.375118	0.342287	0.43747	-0.330138	-0.281948	-0.312604	0.248275	-0.186589	-0.343925	0.219102	-2.86502
F1S4Q9	Cdc42 effector protein 3 OS	-0.90134	0.236917	-0.194537	0.313928	0.412828	0.692806	0.245679	0.446879	-0.513504	-0.58495	-0.820722	-0.00591875	0.00591875	-0.303537	0.023495	-3.37466
F1RV35	Cdc42 effector protein 4 OS	-0.858536	0.328568	-0.331946	0.0812293	0.272126	0.756502	0.262294	0.540661	-0.408398	-0.725427	-0.932819	-0.00073945	0.00073945	-0.220914	0.134745	-2.64459
A0A287B0J2	CRIB domain-containing protein OS	0.06454	0.448789	-0.260234	-0.06454	0.29803	0.749904	0.458713	0.852266	-1.0122	-1.00878	-0.741192	0.431256	-0.23003	-0.242036	0.394245	-1.94851
A0A287BD30	CRIB domain-containing protein OS	-1.61729	0.263998	-1.37556	-0.142983	0.557326	0.944778	0.786839	1.13464	-1.63146	-1.9665	-1.92519	0.142983	-0.508698	0.229139	0.617469	-2.53066
F1RQS5	Cell division cycle 5-like protein OS	-0.781565	0.229547	-0.306444	0.0642267	0.126317	0.398789	0.213469	0.583344	-0.622144	-0.747272	-0.916592	0.0136991	-0.0136991	-0.127236	0.233232	-2.96644
F1SAB0	Parafibromin OS	-0.405154	0.331043	-0.792916	0.00362669	-0.00362669	0.64209	0.0879367	0.272197	-0.691037	-0.343113	-1.39177	0.028019	0.570631	-0.498392	0.42372	-2.53156
F1RJU0	PP1-binding domain-containing protein OS	-1.49589	0.502411	-0.923621	0.00725251	0.451226	0.591951	0.457397	0.5927	-0.82501	-0.710671	-1.00777	0.241847	-0.00725251	-0.50731	0.384126	-2.78905
A0A286ZYA0	zf-4CXXC_R1 domain-containing protein OS	-1.9421	0.12533	-1.08991	-0.679857	0.0465195	0.233213	-0.13013	-0.0351965	-0.397763	0.0351965	0.305633	0.162952	0.538325	-0.841947	0.408217	-1.82568
F1SRD0	CUB domain-containing protein 1 isoform 1 OS	-0.203461	0.735932	0.133003	0.87754	0.754853	1.03579	1.02121	0.779315	-1.13841	-1.1187	-1.36726	-0.0583925	-0.0504335	-0.926968	0.0504335	-2.92186
A0A287BPL8	Uncharacterized protein OS	-0.757289	0.197883	-0.715036	-0.119499	0.0701033	0.376311	0.172952	0.424914	-0.379942	-0.315389	-0.0985783	0.231316	-0.0701033	0.446974	0.465464	-1.91716
F1RFU7	Cadherin-11 isoform X1 OS	-0.0294465	0.789006	-0.440159	-0.280831	0.455747	0.721102	0.169076	0.418121	-0.712727	-0.987808	-1.54309	0.194337	-0.0723185	0.0294465	0.797274	-1.66905
A0A287ALP4	Uncharacterized protein OS	-1.21107	0.0399801	0.189045	0.0399801	0.0472998	-0.0399801	-0.116432	0.358676	-1.04308	-1.51736	-1.29373	-0.303015	0.800239	0.696985	0.557339	-2.05557
I3LSX8	Uncharacterized protein OS	-0.405052	0.496153	-0.31454	-0.234896	0.4487	0.520401	0.368398	0.630825	-0.845921	-0.903407	-0.843106	0.234896	0.409107	-0.670996	0.367183	-2.24601
A0A287A8C4	Cadherin-17 OS	-1.67173	0.271684	-1.30528	-0.488442	-0.0154635	0.352649	0.0154635	0.273414	-0.327572	-0.263548	-0.454206	0.329125	0.725977	0.549758	0.990957	-1.81639
F1SAM3	Uncharacterized protein OS	-0.644721	0.0689192	-0.0253894	-0.0980688	0.0758189	0.283187	0.145684	0.399948	-0.432084	-0.846469	-0.91048	-0.159943	0.0253894	0.262774	0.328953	-2.35027
I3LCR6	Cadherin-3 OS	-0.278157	0.150491	-0.102924	0.144127	0.010572	0.33278	0.0175516	-0.010572	-0.12274	-0.690917	-0.637313	0.110574	0.0286494	-0.13507	0.0396624	-2.61555
O02840	Cadherin-5 OS	-0.69134	0.246957	-0.420967	-0.0302105	0.0691295	0.513019	0.18882	0.253006	-0.61004	-0.874392	-0.950199	0.0302105	-0.0509265	0.208876	0.43854	-2.17538
A0A287BKZ4	Cadherin_C domain-containing protein OS	-0.182216	0.021689	0.281448	-0.013076	0.013076	0.477547	0.222896	0.013076	-0.20644	-0.915888	-1.00806	-0.172359	-0.232539	0.125798	0.137166	-2.68613
A0A286ZJN4	Uncharacterized protein OS	-0.363715	0.670433	-0.678641	-0.46665	0.520537	0.565464	0.363715	0.641674	-0.949756	-0.673278	-1.33803	0.658785	0.551789	-0.790316	0.747435	-2.11807
F1S3A1	Uncharacterized protein OS	-1.69002	0.354773	-0.709644	-0.0127558	0.0286388	0.370438	0.320776	0.509923	-0.877101	-1.31451	-1.36204	0.0127558	-0.238086	0.196222	0.394131	-2.2239
F1RYX3	Uncharacterized protein OS	-0.414693	0.381709	-0.01512	0.287051	0.306486	0.536763	0.396294	0.395084	-0.40202	-0.733972	-0.810064	0.279204	-0.082617	-0.600083	0.01512	-2.66421
F1RJC5	Cyclin-dependent kinase 11B isoform 2 OS	-1.15945	0.556314	-0.421787	0.0370798	0.241722	0.453998	0.417443	0.912096	-0.903908	-0.699384	-0.990288	-0.0370798	0.46075	-0.31798	0.520138	-2.76877
A0A287BFF3	Cyclin-dependent kinase 12 isoform 1 OS	-0.315876	0.0042768	-0.26018	0.0964981	-0.0042768	0.301258	0.02824	0.215458	-0.475193	-0.46926	-0.688366	0.0254414	0.0212332	-0.214803	0.0071167	-2.59067
F1SSC2	Protein kinase domain-containing protein OS	-1.70357	0.466358	-1.57841	-0.701315	0.0311422	0.717656	0.382834	0.703276	-0.801494	-1.1126	-1.74009	-0.0311422	0.224803	0.140668	0.571626	-1.60764
A0A287ABH4	Cyclin-dependent kinase 14 isoform X1 OS	-1.19417	0.179352	-0.662696	-0.254084	0.149232	0.581515	0.210024	0.150449	-0.2883	-0.652048	-1.51841	0.0418488	0.0639738	-0.0418488	0.338373	-2.66056
F1S357	Protein kinase domain-containing protein OS	-0.447498	0.390385	0.017421	-0.0948	0.199465	0.261555	0.16032	0.689416	-0.104984	-0.458337	-0.633986	0.198085	-0.104984	-0.017421	0.248283	-2.29982
F1SPH6	Cyclin-dependent kinase 2 isoform X1 OS	0.143984	0.464251	0.00648151	0.40314	0.633438	0.497117	0.76015	1.22469	-1.42924	-1.06196	-1.27481	-0.270871	-0.179714	-0.916483	-0.00648151	-3.15642
F1RFL1	Cyclin-dependent kinase 2-associated protein OS	-1.8149	0.869152	-1.5224	-0.201546	0.824179	1.35575	1.02609	1.51494	-0.950095	-0.731345	-1.07926	0.429535	0.201546	-0.750195	0.729794	-1.96104
Q197W4	Cyclin-dependent kinase 5 OS	-0.40451	0.240347	-0.080915	0.332039	0.049605	0.2811	0.302969	0.906536	-0.523989	-0.448969	-0.38999	-0.049605	0.241679	-0.298042	0.195661	-2.01259
A0A287B2G7	Uncharacterized protein OS	-1.05212	0.336345	-0.568756	-0.0292196	0.0292196	0.500749	-0.0622544	0.175621	-0.329654	0.074853	-0.326161	0.251222	0.214517	-0.488474	0.058911	-2.72328
F1RWH6	CDK5 regulatory subunit-associated protein 3 isoform b OS	-0.448355	0.598187	-0.89016	-0.592972	0.487905	0.734176	0.102523	0.379433	-0.810618	-0.0936903	-1.01835	0.0936903	0.65032	-0.661105	0.692857	-2.35471
K7GT60	Cyclin-dependent kinase 6 OS	-1.75307	-0.042932	-1.44809	-0.380869	-0.092326	0.0433	0.042932	0.115637	0.116937	-0.049364	-0.494735	0.749481	0.270647	0.167269	0.199874	-2.34849
C9K505	Cyclin-dependent kinase 7 OS	-0.064595	0.428327	-0.0129329	0.150048	0.115978	0.194678	0.0129329	0.379454	-1.10112	-0.59862	-0.46766	-0.0363206	0.179531	-0.159308	0.36167	-2.36415
C9E1C9	CDK9 OS	-0.70658	0.486065	-0.586397	0.090393	0.29342	0.606408	0.33325	1.18875	-1.14218	-0.698249	-0.723388	-0.090393	0.574674	-0.164968	0.604164	-1.53851
F1SQP1	Protein kinase domain-containing protein OS	-1.57423	0.378807	-0.521114	-0.0227095	0.391559	0.707473	0.501521	0.798205	-0.200925	-0.713759	-1.52983	0.208445	-0.111518	0.0227095	0.296139	-2.5563
F1RVT3	Uncharacterized protein OS	-0.650331	-0.030561	-0.49279	0.172791	0.470016	0.347024	0.013468	0.369351	-0.352919	-0.833194	-1.03228	-0.013468	0.66418	0.713266	0.641695	-2.11373
A0A287A9C4	Uncharacterized protein OS	-0.785662	0.320068	-1.30885	0.013076	0.531445	0.861073	0.145072	0.777085	-0.532685	-0.072336	-0.157281	-0.013076	0.793273	-0.735452	0.702978	-2.31751
F1RT10	CDKN2A-interacting protein isoform 1 OS	-0.962002	0.0866465	-0.554144	0.100429	-0.0340855	0.501685	0.303634	0.272984	-0.483287	-0.622474	-1.29767	0.0954325	0.0340855	-0.18548	0.0418986	-2.60814
A0A287ACW8	XRN2-binding (XTBD) domain-containing protein OS	0.03542	0.198918	-0.822316	-0.490439	0.259684	0.389513	0.112041	0.386431	-1.05944	0.026209	-0.026209	0.322301	-0.179125	-1.60026	-0.191351	-2.96983
Q8SPK3	Cyclin dependant kinase inhibitor OS	0.054891	0.219333	-1.33277	-0.445509	-0.054891	0.121787	0.063275	0.3107	-0.782812	-0.088993	-0.096979	0.495527	0.316724	-1.03047	0.335635	-1.69939
F1S6F7	Cyclin-dependent kinase 4 inhibitor C OS	-0.947927	0.239771	-0.450428	0.209917	0.373415	0.922012	0.354556	0.674585	-0.0924709	-0.580488	-0.75382	0.433058	-0.304657	-0.383596	0.0924709	-2.24952
F1S492	ANK_REP_REGION domain-containing protein OS	-1.50334	-0.0785585	-1.25548	-0.46243	0.0045955	0.207422	-0.0045955	0.195459	-0.0879425	0.247076	-0.51463	0.193983	0.74732	0.688698	0.838666	-1.70616
F1SM77	C6_DPF domain-containing protein OS	-0.00736835	-0.088089	-0.663683	0.00736835	0.286441	0.375466	0.220937	0.805478	-0.517294	0.389034	0.170762	-0.157069	0.629956	-0.960732	-0.061702	-2.0525
A0A287AT17	Uncharacterized protein OS	0.26066	0.235253	-0.894946	-0.126271	0.26066	0.329735	0.126271	0.401104	-1.1904	-0.647581	-0.842478	-0.255799	0.304363	-1.14522	0.55278	-2.92737
F1RVV7	Cerebellar degeneration-related protein 2-like OS	-1.15325	0.493403	-0.834128	-0.2177	0.393867	0.57599	0.414095	0.788693	-0.669827	-0.828525	-0.839752	0.376994	0.192294	-0.192294	0.533113	-2.31619
I3LUE6	Uncharacterized protein OS	-1.26396	0.429018	-0.451644	0.201433	0.288401	0.65959	0.563691	1.1044	-0.482816	-0.776329	-0.597543	0.0322085	-0.0322085	-0.0655285	0.545048	-2.9615
F1RX06	Chromodomain Y-like protein isoform a OS	-1.66662	0.270055	-0.464601	0.12676	0.0139395	0.559246	0.298669	0.445109	-0.990208	-0.954651	-1.49571	-0.182457	0.207448	-0.0139395	0.207448	-3.07283
I3L593	Chromo domain-containing protein OS	-0.394669	0.2177	-0.131634	0.646248	0.0593635	0.198178	-0.0593635	0.152924	-0.625651	-0.410565	-0.37699	0.111779	0.142066	-0.480156	0.122866	-3.60264
A0A286ZYT5	Uncharacterized protein OS	-0.760102	0.02801	-0.057605	0.116798	-0.02801	0.0846477	0.226455	0.175215	-0.627694	-1.07415	-1.1391	-0.200501	0.281857	0.584516	0.4214	-2.32814
I3LE51	Uncharacterized protein OS	-1.526	0.346837	-0.978521	-0.162212	0.162212	0.496858	0.329038	0.553626	-0.898031	-0.832251	-1.28667	-0.267527	0.262988	0.931387	2.39758	-1.04863
F1RNW6	CCAAT/enhancer-binding protein alpha isoform c OS	-1.00798	0.642375	-1.168	-0.264214	0.440742	0.680469	0.621722	1.01456	-0.545453	-0.248471	-0.570399	0.038594	-0.038594	0.080152	0.889033	-2.5482
E5Q8C6	CCAAT/enhancer-binding protein OS	-1.08304	0.203626	-0.795028	-0.253787	0.31256	0.31006	0.622699	0.867654	-1.00313	-0.514604	-0.930383	-0.0813977	0.486504	0.0813977	0.737866	-1.70124
A0A287B3B3	BZIP domain-containing protein OS	-1.22458	-0.006603	-0.83778	0.246726	0.277013	1.23345	0.668357	0.465736	-0.456325	-0.124016	-0.740807	0.006603	-0.481455	0.103507	0.413401	-2.90111
F1RNW5	CCAAT/enhancer-binding protein gamma OS	-0.404562	-0.142723	-0.539914	0.176408	0.0406625	0.851277	0.176408	0.495134	-0.971692	-1.64622	-0.604403	0.426858	-0.0406625	0.845253	1.11013	-1.59073
F1S4Q6	CBF domain-containing protein OS	0	0.242245	0	0.18114	-0.067497	0.375911	0.108408	0.129145	-0.84896	-0.621612	-0.708302	-0.285402	0.135016	-0.631545	0.313864	-3.16511
A0A286ZYD5	Protein CEBPZOS isoform X1 OS	-0.80933	0.017463	-0.248862	-0.017463	0.451274	0.595838	0.516673	0.24501	-1.00907	-0.248862	-0.507949	0.196488	0.624169	-0.392108	0.570303	-2.48449
F1SHR4	Bromo domain-containing protein OS	-0.434983	0.161865	-0.178986	-0.0654097	0.307448	0.53415	0.0743154	0.254887	-0.296523	-0.154504	-0.323562	0.0654097	0.0668979	-0.0686738	0.118037	-2.53302
A0A287ABC7	Uncharacterized protein OS	-0.357136	0.13609	-0.113957	0.307408	0.0171581	0.314077	0.204686	0.205882	-0.409276	-0.245059	-0.649785	-0.00896095	0.00896095	-0.537473	0.00896095	-2.63901
A0A287BE87	Uncharacterized protein OS	-0.044023	0.400397	-1.07859	-0.173255	-0.191155	0.419395	0.289891	0.406361	0.424106	0.54797	-0.792419	0.008677	-0.024636	-0.008677	0.487367	-2.353
A0A287AA65	Uncharacterized protein OS	-1.35961	0.35392	-1.05004	-0.0472856	0.359123	0.934006	0.0472856	0.196579	-0.712202	-0.690539	-1.70566	0.36844	0.0879636	-0.46784	0.189587	-2.25416
A0A287AEM7	Uncharacterized protein OS	-1.64492	-0.092802	-1.21873	-0.592979	-0.132742	0.261489	0.154436	0.092802	-0.548659	0.894253	1.12	0.677303	1.05655	-0.691735	0.19828	-1.45973
Q29026	Cell cycle exit and neuronal differentiation protein 1 OS	-5.33036	2.09842	-2.25997	-0.65228	1.49492	1.18692	2.06625	3.06967	-2.42347	-2.02293	-2.17655	1.20414	-0.18061	0.18061	2.13643	-0.25568
F1RVF8	Uncharacterized protein OS	-0.881932	0.461504	-0.481221	0.0100566	0.28228	0.686783	0.473811	0.900775	-0.665253	-0.574906	-0.707578	0.055428	-0.0100566	-0.201367	0.359076	-2.55204
F1S2Y5	Uncharacterized protein OS	-0.847998	0.989275	-0.00213701	0.00213701	0.451445	0.866873	0.951092	0.990351	-0.920388	-0.811108	-1.43452	0.110998	-0.00315702	-0.482538	0.308181	-2.67338
I3LLB9	Centromere protein J OS	0.414201	1.14155	0.487838	0.0528755	0.609568	0.591694	-0.21502	0.863693	-1.0568	-0.928665	-1.22389	-0.0528755	-0.280172	-0.795954	0.23599	-2.96343
F1RIF6	Uncharacterized protein OS	-1.72208	-0.0574205	-1.39141	-0.719249	-0.236674	0.248828	-0.0353725	0.0353725	0.104134	0.184835	0.0965687	0.51388	0.166163	-0.0859265	0.402939	-2.73065
F1SDE3	Centromere protein V OS	-0.803475	0.15213	-0.262908	0.0405151	0.128062	0.625	0.242086	0.521021	-0.247083	-0.51959	-0.496541	0.142817	-0.390369	-0.0405151	0.0730957	-2.28428
A0A287BAP4	DUF4485 domain-containing protein OS	-1.91901	0.143678	-1.49191	-0.555279	-0.0123815	0.225572	0.0123815	0.201784	0.0167275	-0.0131735	-0.321477	0.693642	0.693642	-0.0729335	0.693642	-2.06704
A0A287B4I4	Uncharacterized protein OS	-1.46233	0.481859	-0.664823	-0.0716489	0.0716489	0.415648	0.153781	0.414479	-0.597259	-1.00602	-1.47094	0.197921	0.388527	-0.154208	0.369354	-2.11318
A0A286ZYM9	Uncharacterized protein OS	0.237797	0.571685	0.0523925	0.0645965	0.19085	0.406182	0.425237	0.847691	-1.17861	-1.35556	-1.64487	-0.0633575	-0.286974	-0.892393	-0.0523925	-3.14624
F1RZA9	Uncharacterized protein OS	-1.36706	0.202541	-0.523375	-0.00683745	0.311238	0.635589	0.341772	0.610729	-0.525342	-0.843339	-1.02342	0.0811102	0.00683745	-0.515534	0.281169	-2.31509
A0A287AA61	Centrosomal protein of 135 kDa OS	0.0839157	0.568471	-0.926791	-0.381241	0.238354	0.401266	-0.0839157	0.433905	-0.884441	-0.481377	-0.69217	0.294727	0.924615	-0.62838	0.728076	-1.82031
A0A287AIA1	FHA domain-containing protein OS	-0.460181	0.383906	-0.421435	0.0842578	0.124782	0.401075	0.345401	0.689857	-0.580835	-0.610348	-0.95016	0.0570768	-0.0570768	-0.0807158	0.404484	-2.70759
A0A287AKA8	FHA domain-containing protein OS	-1.03557	0.297656	-0.510588	0.0400649	0.203361	0.544398	0.240835	0.67151	-0.78655	-1.02072	-1.18658	0.0956669	-0.0400649	-0.198241	0.235895	-2.6116
F1SMB8	Uncharacterized protein OS	-0.844555	0.500815	-0.507863	-0.188985	0.124896	0.654547	0.624091	0.75499	-0.0879382	-0.226092	-0.320395	0.152694	0.245976	-0.320395	0.0879382	-2.61394
F1S4X2	Centrosome-associated protein CEP250 isoform X1 OS	-0.97404	0.530055	-0.83703	-0.136021	0.291478	0.319406	0.0739661	0.371557	-0.844447	-0.926034	-1.34984	0.0434802	0.112785	-0.0434802	1.09091	-1.5947
F1S697	CAP-Gly domain-containing protein OS	-0.057458	0.474514	-0.13538	0.274645	0.263011	0.521169	0.297636	0.726578	-0.63442	-0.541718	-0.742842	-0.118542	0.057458	-0.466189	0.125858	-2.66743
F1SND9	Centrosomal protein of 41 kDa isoform 1 OS	-0.472688	0.375309	-0.932116	-0.286341	0.100569	0.469329	0.023627	0.787611	-1.06094	0.0542912	-0.398141	-0.023627	0.76832	-0.743613	0.421909	-2.05765
F1STI6	Uncharacterized protein OS	-1.13169	0.477228	-0.480211	0.0345712	0.221518	0.484767	0.195499	0.696223	-0.790132	-0.593593	-0.864817	-0.0345712	0.323544	-0.299146	0.318731	-2.94069
A0A287AP47	Uncharacterized protein OS	-0.949526	0.284744	-0.267871	0.0452466	0.0750477	0.476557	0.145132	0.481403	-0.824647	-0.991883	-1.01354	-0.0452466	0.193186	-0.517629	0.0903547	-2.79388
I3LFF2	Centrosomal protein of 83 kDa isoform X1 OS	0.0486275	0.280535	-0.251841	0.0778135	0.280535	0.429858	0.288879	0.0288375	-1.13136	-1.06917	-1.34119	-0.0288375	-0.103722	-0.510385	0.225965	-2.81546
A0A287ALW3	Centrosomal protein of 85 kDa isoform X1 OS	-2.7696	1.11631	-2.38083	-1.31423	-0.12634	0.942234	1.1353	0.82893	-1.05663	-1.26099	-1.8857	0.12634	0.954665	1.43139	1.83872	-1.73289
I3LAW1	Uncharacterized protein OS	0.145354	0.502063	0.025346	0.39406	0.309968	0.649691	0.239285	0.477445	-1.1548	-1.27963	-1.58221	-0.158084	-0.098167	-0.588841	-0.025346	-3.30121
A0A286ZML4	Uncharacterized protein OS	-0.806249	-0.19628	0.265186	0.33325	0.248832	0.1529	0.135213	0.344289	-0.449114	-0.627401	-0.664535	-0.167773	0.425529	-0.135213	0.417189	-1.71864
A0A287BBZ0	Carboxylic ester hydrolase OS	-0.340623	0.20967	0.143391	0.116291	0.146215	0.349749	0.0210685	0.439946	-0.126157	-0.409432	-0.652703	-0.0353924	-0.172895	-0.0210685	0.228442	-2.51252
I3LEI5	Carboxylic ester hydrolase OS	-0.495388	0.466965	-0.219659	-0.0209324	0.197634	0.528459	0.563506	0.716662	-0.34011	-0.269253	-0.613783	0.0209324	0.128393	-0.573998	0.431761	-1.91335
F2Z563	Uncharacterized protein OS	-1.36838	0.171947	-0.685951	-0.0172741	0.268635	0.785077	0.444505	0.863126	-0.155994	-0.85769	-0.737613	0.171947	-0.315081	0.0172741	0.187859	-2.85225
A0A287ATA9	Uncharacterized protein OS	-1.53729	0.748353	-0.699282	-0.391667	0.404993	0.533996	0.462709	1.03821	-1.35588	-1.64493	-1.5901	0.362668	0.249715	-0.249715	0.87863	-2.92431
A0A286ZKE9	Uncharacterized protein OS	-1.74108	0.153154	-1.18881	-0.482794	-0.0398655	0.252477	0.0523805	0.331476	-0.387493	0.0398655	-0.36783	0.396699	1.02878	-0.0493245	0.999748	-2.62065
F1SQK9	ARL2_Bind_BART domain-containing protein OS	-0.385595	0.171196	-0.278111	-0.171196	0.180648	0.424035	0.173903	0.449949	-0.779533	-0.538928	-0.440426	0.349376	0.305618	-0.47605	0.431971	-2.4425
A0A287BR42	Uncharacterized protein OS	-1.13224	-0.238607	-0.429622	-0.397394	-0.119913	0.428957	0.0595245	0.261427	-0.0282285	0.310382	-0.125181	0.251976	0.377733	0.0282285	0.203767	-2.0973
F1RZQ5	Uncharacterized protein OS	-0.863553	0.23345	-0.868987	0.0089424	0.232181	0.550806	0.216874	0.845207	-0.654393	-0.805093	-0.626514	-0.0593002	-0.0089424	0.145907	0.541621	-2.67091
F1RQW6	Complement factor B OS	-0.584153	-0.048318	-0.373509	-0.671813	0.936392	0.722575	0.048318	-0.32796	0.469944	-0.343872	-0.581003	0.645421	0.183973	1.55964	1.61213	-0.984563
P51779	Complement factor D OS	-0.694664	0.353582	-0.984463	-0.376986	0.597251	0.743393	0.012289	0.44308	-0.235233	-0.081688	-0.724136	-0.012289	0.127766	0.838093	0.565494	-1.56781
A0A287BBX9	Craniofacial development protein 1 OS	-0.851009	0.00215011	-0.213579	0.297499	0.0248702	0.543523	0.0430702	0.178422	-0.309794	-0.655458	-0.528047	-0.00215011	0.0747186	-0.208601	0.105687	-2.84585
A0A286ZJK1	Uncharacterized protein OS	-0.959126	0.47018	-1.50209	-1.04701	0.0876455	0.318854	-0.0876455	0.302536	-0.818646	-0.709823	-1.08228	0.456726	0.541439	0.976328	1.42504	-0.621549
A0A287AQ20	Complement factor I isoform 1 preproprotein OS	-0.975166	-0.0685035	-1.54994	-0.783797	0.499992	-0.18398	0.0833175	0.879636	-1.16053	0.109284	-1.13744	0.0685035	0.691563	0.790168	1.40426	-0.777836
P10668	Cofilin-1 OS	-0.57884	0.28158	-1.49123	-0.472971	0.059636	0.447765	0.225373	0.916318	-0.701046	-0.059636	-0.184083	0.25854	0.395298	-1.01107	0.313494	-1.95931
Q5G6V9	Cofilin-2 OS	-0.536338	0.398669	-0.586248	-0.374114	0.164959	0.43324	0.135868	0.768994	-0.616572	-0.135868	-0.547531	0.274516	0.390482	-0.616572	0.288431	-1.9256
A0A286ZZW1	CASP8 and FADD-like apoptosis regulator isoform 1 OS	0.391675	0	-0.796023	-0.484079	0.10559	0.31517	-0.053217	0.614985	-0.793103	0.779151	0.433458	-0.060229	0.795751	-0.456065	0	-2.5223
K7GQR1	Uncharacterized protein OS	-1.70137	0.63296	-1.86612	-0.817495	0.20483	0.342081	-0.0471705	0.79348	-0.673105	0.586959	-1.00974	-0.0438765	0.419288	0.0438765	1.12806	-0.937666
I3LM39	Cyclic GMP-AMP synthase OS	-2.66955	1.54244	-0.959492	-0.0898285	0.973046	1.5237	1.4426	1.70473	-0.960612	-0.491043	-0.947523	0.37106	0.0898285	-0.327513	0.566522	-2.67299
A0A287ARL7	CGG triplet repeat-binding protein 1 OS	-0.672914	0.249737	-0.575105	-0.0546065	0.22469	0.586979	0.250978	0.713001	-0.644945	-0.60174	-0.785452	0.0546065	0.0546065	-0.201338	0.356209	-2.3628
F1ST04	Myosin_tail_1 domain-containing protein OS	-1.21149	0.179558	-0.521359	-0.0194678	0.23575	0.558167	0.348775	0.535463	-0.454622	-0.821716	-0.935707	0.208551	-0.208151	0.0194678	0.209799	-2.50694
A0A286ZRZ8	Cingulin-like protein 1 isoform X2 OS	-1.09354	0.388474	-0.68373	0.0590568	0.0251415	0.513115	0.259058	0.716366	-0.839978	-0.898663	-1.16378	0.0882568	-0.0251415	-0.482975	0.200699	-2.62009
A0A287B9D3	Uncharacterized protein OS	0.0623425	0.819641	0.359865	0.151082	1.1401	0.801169	0.373682	0.509595	-0.213783	-0.584426	-0.9253	-0.349597	-0.0623425	-0.757086	-0.117506	-3.05728
F1S7L7	Uncharacterized protein OS	0.551067	0.690179	-0.384033	0.12418	0	0.226093	0.367246	0.923438	-1.04278	-0.13055	0.239886	0	-0.059569	-0.668378	-0.135883	-3.2127
F1SU49	CHCH domain-containing protein OS	-0.121699	-0.0133225	-0.58177	-0.0534225	0.0800832	0.412354	0.166412	0.561055	-0.170255	-0.189788	0.0133225	0.222566	0.139629	-0.415761	0.122454	-2.33842
F1RL20	CHCH domain-containing protein OS	-0.867846	0.17364	-1.26653	-0.19014	-0.0047715	0.827895	0.0376865	1.09317	-0.690525	0.279647	0.165153	0.452336	0.0047715	-0.0902415	-0.0667275	-1.21393
F1RIU9	Coiled-coil-helix-coiled-coil-helix domain-containing protein 2 OS	-0.427215	0.607136	-1.52148	-0.338731	0.118098	0.289181	-0.0274675	1.45631	-1.06754	0.21037	-0.202342	0.0274675	0.966757	-1.16563	0.144652	-0.90139
A0A286ZRH7	MICOS complex subunit OS	-1.55891	0.0909581	-0.647889	0.00525705	0.272277	0.558954	0.447719	0.716249	-0.313308	-0.617613	-0.913279	0.216489	-0.00525705	-0.146081	0.259786	-2.39984
F1SPI0	Mitochondrial intermembrane space import and assembly protein 40 isoform 1 OS	-2.14676	0.0356655	-0.66514	-0.015013	0.155081	0.632782	0.397747	1.17716	-0.577397	-0.805026	-0.768763	0.015013	0.543927	-0.36142	0.2778	-2.20095
F1SUA4	Uncharacterized protein OS	-0.316733	0.437213	-1.1993	-0.134804	0.147098	0.477704	-0.0498565	1.31591	-0.444574	0.294911	-0.0176065	0.0176065	1.16208	-0.427027	0.461643	-0.859612
A0A287A8F8	MICOS complex subunit OS	-1.27878	0.404775	-0.837208	-0.14721	0.277835	0.663634	0.633451	0.982971	-0.630194	-0.806541	-0.963764	0.358779	-0.170097	0.14721	0.437752	-1.99171
A0A287AW63	Uncharacterized protein OS	-1.59049	0.481189	-0.98606	-0.572514	0.410638	0.575912	0.428602	0.997483	-0.916382	-0.235479	-1.07501	0.235479	0.363559	-0.815147	0.407245	-1.88
A0A287BSZ4	Uncharacterized protein OS	-0.894083	0.199111	-0.33098	0.291426	0.0364764	0.485263	0.260088	0.0909241	-0.583043	-0.88597	-0.989361	-0.0364764	0.268592	-0.262865	0.528393	-2.55705
A0A287A4M4	Chromodomain-helicase-DNA-binding protein 2 isoform 1 OS	-1.08254	0.0279595	-0.594041	0.204518	0.10088	0.500027	0.174801	0.49763	-0.939178	-0.483293	-0.753452	0.333843	-0.0279595	-0.635559	0.316257	-2.80286
A0A286ZJL1	Chromodomain-helicase-DNA-binding protein 3 isoform X1 OS	0.0837099	0.694845	0.0911658	0.042769	0.329196	0.244804	0.293446	0.711389	-1.31988	-1.35719	-1.79648	-0.402285	-0.613237	-0.834123	-0.042769	-3.213
F1SLR5	Chromodomain-helicase-DNA-binding protein 4 OS	-0.675241	0.253246	-0.533444	0.218026	-0.0777187	0.593694	0.280328	0.345889	-0.621845	-0.410237	-0.911098	-0.110923	0.274218	0.0777187	0.0861145	-2.03916
F1SDV1	Chromodomain-helicase-DNA-binding protein 6 OS	0.04648	0.628044	0.289575	0.431505	0.735121	0.752913	0.322188	0.679295	-1.20722	-1.27893	-1.53949	-0.200558	-0.251514	-1.12498	-0.04648	-3.29311
F1RT88	Chromodomain-helicase-DNA-binding protein 7 isoform X1 OS	0.376119	0.388179	-0.002544	0.382162	0.36243	0.382162	0.706199	0.701374	-0.672659	-1.09437	-1.58047	-0.051528	-0.058278	-0.800049	0.002544	-3.13288
F1S8J5	Chromodomain-helicase-DNA-binding protein 8 OS	-0.377847	0.439391	-0.245297	0.0562937	0.202732	0.669217	0.416857	0.669217	-0.861398	-0.931263	-1.1899	-0.0562937	0.205239	-0.265982	0.409266	-2.51347
A0A287BSL8	Uncharacterized protein OS	-0.364644	0.0210092	-0.481739	-0.0150599	0.0150599	0.8001	0.362983	0.584037	-0.384167	-0.263558	-0.515786	0.148765	0.0919639	-0.397992	0.167659	-3.30389
F1SH89	Choline dehydrogenase OS	-0.545729	0.543492	-0.0748385	0.375053	0.3015	0.431076	0.16617	0.833491	-0.225183	-0.281545	-0.665623	-0.0898575	0.293806	-0.273901	0.0748385	-1.94931
A0A286ZND4	Serine/threonine-protein kinase Chk2 isoform X4 OS	-1.5807	0.409596	-0.795595	-0.347915	0.302359	0.83462	0.348191	0.763339	-0.022937	0	-1.36582	0.907194	-0.156054	0	1.02928	-2.12844
F1S9W3	Calcium homeostasis endoplasmic reticulum protein OS	-0.54426	0.491866	-0.281607	-0.0775716	0.409272	0.551918	0.362478	0.873633	-1.13151	-1.06768	-1.15925	0.0775716	0.250959	-0.236577	0.415163	-2.32219
F1RI74	Zinc finger protein 605 isoform 2 OS	-1.38539	0.285464	-0.627305	-0.151704	0.151704	0.435739	0.232965	0.393783	-0.394865	-1.53056	-2.04137	1.48915	-1.25436	2.02937	1.51903	-1.17981
F1RI73	Uncharacterized protein OS	-1.91109	0.142083	-1.27492	-0.498071	0.0106295	0.233955	0.0060685	0.261905	-0.474508	-0.264838	-0.682202	0.184634	0.265678	-0.0060685	0.351531	-1.87086
F1SD66	Chromogranin-A OS	-1.02876	-0.0643435	-0.381068	-0.491437	0.0643435	0.432683	0.502176	0.486732	-0.108618	-0.806372	-0.463669	0.482845	0.448712	0.530068	0.976772	-2.15228
Q9GLG4	Secretogranin-1 OS	-1.90776	0.0466815	-1.38375	-0.660084	-0.0466815	0.216058	0.0693075	0.256558	-0.360285	-0.945243	-1.08945	0.814065	0.0476975	0.193854	0.626755	-2.15712
A0A287BKG2	Chitinase-3-like protein 1 OS	-1.34727	-0.0155005	-1.11955	-0.508026	0.0329455	0.0730355	0.0155005	0.1735	-0.780564	-0.151405	-0.736364	0.421066	0.109555	0.0203615	1.16304	-2.14313
I3LL32	Chitin-binding type-2 domain-containing protein OS	0.557348	0.861864	0.901626	1.0404	0.076419	0.364873	0.304002	0.363517	-1.24361	-1.12455	-1.26306	-0.349449	-0.278299	-0.69411	-0.076419	-3.35242
F1RZ01	Glyco_18 domain-containing protein OS	-0.922666	0.222595	-0.148886	0.203118	0.431899	0.763596	0.441429	0.980142	-0.237355	-0.354099	-0.578898	0.148886	-0.566906	-0.603186	0.189043	-2.45659
D2D0E0	Choline/ethanolamine kinase OS	-2.25276	0.194429	-1.21403	-0.387716	-0.0745915	0.235488	-0.00297649	0.338201	0.177842	0.00297649	-0.0502795	0.220104	0.322967	-0.0342945	0.339931	-2.29972
K7GL59	Rab proteins geranylgeranyltransferase component A OS	-0.789397	0.401365	-0.686398	-0.178211	0.026925	0.718728	0.157628	0.327553	-0.36549	0.03313	-0.948412	-0.026925	0.541809	-0.329219	0.766996	-2.36345
I3LU89	Uncharacterized protein OS	-2.03767	0.110111	-0.94747	-0.106168	0.106168	0.593098	0.436496	0.905981	-0.775118	-1.44883	-1.63431	0.130964	-0.307116	0.12448	0.367885	-2.54065
I3LSS2	Uncharacterized protein OS	-1.64372	0.141713	-0.216408	0.22994	-0.0379932	0.374097	0.572263	0.118126	-0.149673	-1.26383	-1.46288	0.432637	-0.321786	0.492974	0.0379932	-1.89782
F2Z5Q1	Uncharacterized protein OS	-2.1206	0.195093	-0.867449	-0.112851	0.112851	0.600732	0.599788	0.881727	-0.816193	-1.47476	-1.66117	0.206291	-0.286841	0.38883	0.457086	-2.62986
I3LFQ9	Uncharacterized protein OS	-0.690139	0.769292	-1.04629	-0.354749	0.530239	0.567249	0.472252	1.12284	-1.12029	-0.259687	-0.783245	0.259687	1.18022	-0.517712	0.712873	-1.74763
A0A286ZN07	Uncharacterized protein OS	-1.78678	0.184332	-0.887199	-0.0994052	0.0994052	0.413777	0.369822	0.52617	-0.476836	-1.07187	-1.34098	0.14184	-0.368632	0.170307	0.465858	-2.80681
F1S4Z2	Uncharacterized protein OS	-2.12285	0.158898	-1.33598	-0.158898	0.242986	0.768688	0.546295	0.76032	-0.717908	-1.5113	-1.61635	0.175357	-0.402072	0.24898	0.433979	-2.54409
A0A286ZTW3	Uncharacterized protein OS	-2.0632	0.129068	-0.915977	-0.122532	0.16641	0.571563	0.496702	0.697414	-0.210578	-1.04249	-1.35271	0.127763	-0.190903	0.122532	0.314849	-2.5558
F1SE87	Uncharacterized protein OS	-0.942142	-0.0564132	-0.379516	0.0564132	0.066507	0.497976	0.204794	0.394172	0.248516	-0.335181	-0.26118	0.187721	-0.268412	-0.211549	0.142087	-2.88267
F1RZY6	Uncharacterized protein OS	-1.73629	0.506705	-1.65435	-0.899782	0.057626	0.185519	0.10676	0.999744	-1.14821	0.149215	-0.638936	-0.057626	0.637175	-1.22171	0.441945	-1.93699
M3VK03	Charged multivesicular body protein 7 OS	-0.307458	0.649414	-0.274246	-0.19899	0.19899	0.50159	0.322897	0.602854	-0.636816	-0.783037	-0.945766	0.299731	0.525086	-0.36594	0.765752	-2.13973
A0A287AFZ8	Cysteine and histidine-rich domain-containing protein 1 OS	0.015029	0.698204	-1.22294	-0.489487	0.09811	0.257466	-0.015029	1.10249	-0.582069	-0.358472	-0.77753	0.106859	1.05807	-0.093031	0.756079	-1.20551
F1SSV2	Uncharacterized protein OS	-1.0166	0.569432	-1.48805	-0.836773	0.495263	0.769632	0.597855	0.957643	-1.54215	-0.301498	-0.738741	0.301498	0.301498	-1.00072	0.507523	-2.46173
F1RSJ4	CBFD_NFYB_HMF domain-containing protein OS	-0.236679	0.247071	-0.377369	-0.0193224	0.0035552	0.215576	0.320652	0.215576	-0.592086	-0.220019	-0.0035552	0.0619382	0.0316514	-0.626799	0.226556	-2.45516
A0A287AV43	FoP_duplication domain-containing protein OS	-0.645758	0.453431	-0.260265	0.280925	0.42525	0.741723	0.697329	0.885356	-0.327474	-0.542934	-0.306775	0.260265	-0.632819	-0.481332	0.278187	-2.72868
A0A287AU46	Probable cytosolic iron-sulfur protein assembly protein CIAO1 OS	-0.864576	0.36989	0.207834	0.625391	0.254163	0.581941	0.270355	1.11136	-1.15242	-0.967796	-1.26208	-0.065741	-0.107092	-0.601156	0.065741	-3.30976
A0A287BQ89	MIP18 family protein FAM96A isoform a OS	-0.625017	0.166938	-0.142727	0.197575	0.0992203	0.029716	0.0992203	0.330437	-0.268416	-0.125386	-0.240146	0.00158	0.570671	-0.291438	-0.00158	-1.90966
A0A286ZVK9	Mitotic spindle-associated MMXD complex subunit MIP18 OS	-0.346837	0.44613	-0.56923	0.153103	0.400679	0.696009	0.521603	0.787569	-0.460897	0.0245304	-0.305827	-0.102197	0.3871	-0.703208	-0.0245304	-2.96818
I3L704	Anamorsin OS	-1.08006	0.843132	-1.49866	-0.646433	0.334985	0.652632	0.450462	1.36407	-1.24199	-0.890086	-0.963756	0.181497	0.653704	-0.181497	0.65156	-1.70292
F1SJX5	Calcium and integrin-binding protein 1 isoform b OS	-0.685482	0.91764	-1.29812	-0.744372	0.405371	0.688584	0.345913	1.38078	-1.29371	-0.181624	-0.461442	0.181624	0.636446	-0.708752	0.548406	-2.72053
F1RGJ6	HMG box domain-containing protein OS	-0.808803	0.30994	-0.169053	0.114167	0.151912	0.538406	0.253587	0.603732	-0.759643	-0.958863	-0.972802	-0.0713375	0.0713375	-0.231361	0.25598	-2.45767
I3L936	Corepressor interacting with RBPJ 1 OS	0.079324	0.704027	0.282527	0.524269	0.349145	0.673155	0.287971	0.795736	-1.18828	-1.41594	-1.50552	-0.190072	-0.408781	-1.02433	-0.079324	-3.22424
F1S6R1	Cold-inducible RNA-binding protein isoform 1 OS	-0.279963	0.396731	-0.338398	0.399485	0.520769	0.94117	0.667325	0.85754	0.107837	-0.147474	-0.204862	0.651243	-0.262449	-0.151498	-0.107837	-2.62409
X5FUA3	CDGSH iron sulfur domain 1 OS	-0.965406	0.462094	-0.449896	-0.124032	0.215257	0.324241	0.406348	0.829826	-0.962286	-0.607016	-0.981136	0.0624864	0.67381	-0.0624864	0.239895	-1.13104
F1S108	CDGSH iron-sulfur domain-containing protein 2 OS	0.002398	0.362128	-0.598613	-0.276685	-0.002398	0.443138	0.0541239	0.842215	-0.691077	0.58736	0.273654	-0.261275	0.900752	-1.04629	-0.119077	-1.27475
I3LUF9	Uncharacterized protein OS	-1.90928	-0.416773	-0.643323	0.76441	0.0567424	0.619104	0.211136	0.123925	0.47998	-0.602614	-0.906358	0.103807	-0.0567424	1.12606	-0.222831	-1.26893
F1RL46	Uncharacterized protein OS	-1.76498	0.171566	-1.02454	-0.671211	-0.0383245	0.277012	0.129286	0.502588	2.59647	1.09299	1.37135	0.0383245	-2.05491	-1.83486	-2.14802	-4.70699
A0A287B098	Uncharacterized protein OS	-1.88198	-0.048035	-1.36136	-0.645163	-0.00373501	0.167081	-0.002974	0.374638	0.118589	0.066245	-0.209571	0.287408	0.093498	0.002974	0.125207	-1.9668
F1RRW9	Matrin-type domain-containing protein OS	-0.552569	0.0755897	-0.574297	0.0345489	0.0431366	0.591975	0.0977428	0.424608	-0.64611	-0.446578	-0.448583	-0.0345489	0.141054	-0.524803	0.0615693	-2.8404
Q8HXL4	Cytoskeleton-associated protein 1 OS	-2.04848	0.556826	-1.54105	0.0086015	0.208612	0.792672	0.492694	1.0545	-0.216385	-0.496233	-1.08451	0.394985	-0.0086015	-0.277627	0.135039	-2.45707
F1SPP8	Uncharacterized protein OS	-0.155021	0.952753	-0.577476	-0.164299	0.155021	0.396258	0.372075	0.410076	-0.748331	-0.802347	-1.34873	0.284773	0.856952	-0.262505	0.859701	-1.82572
A0A287AK10	Uncharacterized protein OS	0.162645	0.477909	-0.0473901	-0.0275329	0.0275329	0.303167	0.201994	0.411202	-0.846693	-0.455268	-0.771087	-0.0895271	0.527282	-0.315355	0.468259	-1.29878
I3LPB5	Creatine kinase B-type OS	-0.026658	0.719781	-0.588052	-0.348586	0.360964	0.360964	0.133806	0.594066	-0.766455	-0.472575	-0.286302	0.026658	0.89038	-0.321266	0.623566	-1.12862
Q5XLD3	Creatine kinase M-type OS	-1.07837	0.503056	-1.75644	-1.0026	0.512478	0.765894	-0.34565	0.316643	-1.243	1.65647	-0.859007	0.301777	0.08368	-0.08368	0.547271	-1.82006
F1SI77	Creatine kinase U-type, mitochondrial isoform 1 OS	-0.193177	0.558481	-2.14477	-1.92133	-0.521272	-0.708833	-1.08734	0.193177	-0.92447	0.258315	0.487023	0.386728	0.819077	-0.86294	0.490564	0.34952
I3L6M9	Cyclin-dependent kinases regulatory subunit OS	-0.179689	-0.0138805	-0.986116	-0.0693435	0.115355	0.624492	0.577115	0.756979	-0.501617	0.0848854	-0.309262	0.346123	0.0138805	-0.181541	0.164265	-2.56786
A0A287BDR1	FAD synthase OS	-2.08439	0.16341	-1.43515	-0.455791	0.0065375	0.177732	0.0462755	0.266613	-0.746077	-0.0201025	-0.723707	-0.0065375	1.18382	0.150472	0.67899	-1.18275
F1RN17	Cyclin-dependent kinases regulatory subunit OS	-1.77157	0.0861305	-1.18616	-0.347866	-0.0299315	0.300606	0.000409499	0.259789	-0.463542	-0.000409499	-0.336201	0.6638	0.641237	0.134942	0.960636	-1.59725
A0A287A571	Uncharacterized protein OS	-0.240052	0.218067	-0.0621344	-0.0274834	0.247949	0.617929	0.250518	0.259475	-0.691616	-0.598506	-1.42038	0.0274834	0.465926	-0.23825	0.42784	-2.44928
A0A287AA01	Uncharacterized protein OS	-0.757533	0.205159	-0.268844	0.137114	0.0322989	0.669204	0.201244	0.311888	-0.688112	-0.747409	-1.27429	-0.0322989	0.251329	-0.276103	0.434794	-2.39949
A0A287A2C8	DRY_EERY domain-containing protein OS	-1.49718	0.030975	-1.39325	-0.384147	-0.015159	0.34853	0.086625	0.318368	0.00287999	-0.00287999	-0.259005	0.461789	0.711989	-0.008662	0.571787	-2.4451
A0A287AUI7	Uncharacterized protein OS	-1.39531	0.429572	-0.231398	0.0967144	0.175439	0.480912	0.235215	0.460808	-2.08422	-2.1543	-2.54989	0.149231	-1.00557	-0.0967144	1.25747	-1.37615
A0A287BE85	Chloride channel protein OS	-0.162234	0.164267	-0.112033	0.0952117	-0.04879	0.432676	0.230168	0.64487	-0.480204	-0.080065	-0.158715	0.04879	0.381634	-0.167528	0.278988	-2.38874
I3LC74	Chloride channel protein OS	-0.86779	0.171255	-0.538222	0.0426709	0.14745	0.435118	0.0682531	0.403731	-0.798009	-0.652345	-1.18335	-0.0426709	0.167522	-0.251674	0.346555	-2.18972
A0A287B7B2	Claudin OS	-1.54605	0.393046	-0.76918	-0.0606505	0.228958	0.48144	0.299002	0.323833	-0.873361	-1.12638	-1.26203	0.132358	0.0606505	-0.217535	0.22188	-2.89985
A0A288CFV8	Claudin OS	-1.43708	0.363	0.135981	0.46166	1.29963	1.20921	1.0856	1.34169	-1.14254	-1.21267	-1.3292	-0.103714	-0.32746	-0.725462	0.103714	-3.159
A0A287AAI1	C-type lectin domain-containing protein OS	-1.21137	0.264187	-1.26233	-0.475031	0.242646	0.389155	-0.185012	0.0808357	0.306329	0.226564	-1.53252	0.0087847	-0.550218	-0.0087847	0.412698	-2.18963
F1SHL0	C-type lectin domain family 14 member A OS	-1.83486	0.163128	-1.24859	-0.524695	-0.060382	0.147699	0.108608	0.280747	0.530357	-0.152051	-0.884261	0.060382	0.597529	0.321063	-0.117723	-1.58215
A0A287ABJ5	C-type lectin domain-containing protein OS	-2.40179	0.929583	-1.38088	-0.480233	1.51489	1.72899	0.778625	1.30188	-0.52541	-1.3299	-2.23304	0.200616	-0.200616	0.567611	1.2127	-1.71846
F1SRC8	Tetranectin OS	-0.691981	0.520511	-1.16265	-0.817512	0.221036	0.190835	-0.207651	0.686137	-1.38859	-0.697106	-0.809165	-0.176896	0.661322	0.176896	1.3093	0.235902
A0A287AYG2	Clathrin heavy chain linker domain-containing protein 1 OS	-2.29037	0.919077	-1.08321	0.165193	0.89479	1.50174	1.10093	1.47078	-0.942545	-0.737845	-1.32188	-0.013384	0.034125	-0.620685	0.013384	-3.17391
A0A287B250	Chloride intracellular channel protein OS	-0.367209	0.590454	-1.13076	-0.552033	0.148023	0.471486	0.360505	0.944583	-0.935795	0.0723225	-0.402779	-0.0723225	0.946351	-0.241129	0.571104	-0.618434
A0A287A7Q5	Chloride intracellular channel protein OS	-0.182043	0.928615	-1.04546	-0.67232	0.16588	0.43419	0.195693	0.960953	-1.00921	-0.04179	-0.290977	0.04179	1.06152	-0.339662	0.628479	-1.37844
A0A287ADH9	Chloride intracellular channel protein OS	-0.541354	0.280067	-0.612088	-0.00395299	0.114692	0.380644	0.142173	0.624731	-0.719933	-0.037636	-0.590501	0.00395299	0.775503	-0.359969	0.269613	-0.641383
A0A286ZIU2	Chloride intracellular channel protein OS	-0.0527213	0.503419	-0.634516	-0.477302	0.226081	0.187678	0.0761091	0.595315	-1.05272	0.0527213	-0.244007	-0.0815434	0.710014	-0.936999	0.206345	-1.56052
F1RQF6	Clathrin interactor 1 isoform 1 OS	-0.216966	-0.0698337	0.0306775	0.244593	0.177666	0.429697	0.148603	0.499319	-0.143235	-0.621833	0.0138931	-0.00619865	0.00619865	-0.49849	-0.0633426	-3.1347
A0A287BKR6	ENTH domain-containing protein OS	-0.740048	0.318654	-0.259422	0.0843245	0.209968	0.291948	0.207485	0.513168	-0.624939	-0.959647	-0.413334	0.0093263	-0.0093263	-0.508101	0.089728	-3.2322
A0A287B0R3	CAP-Gly domain-containing linker protein 1 isoform b OS	-2.08656	1.33491	-1.13083	-0.384897	0.623607	0.568041	0.763202	1.31179	-0.783776	-1.55544	-0.957726	0.385789	-0.136969	0.136969	1.17383	-1.88699
F1REW5	Uncharacterized protein OS	-1.30888	0.320137	-0.664756	-0.026406	0.116604	0.352318	0.153598	0.522243	-1.19909	-1.28229	-1.60175	0.026406	0.153598	-0.374079	0.451712	-2.43502
F1RJL6	Uncharacterized protein OS	-0.723465	0.444292	-0.808797	-0.0472216	0.0472216	0.367434	0.218098	0.458325	-0.536313	-0.631422	-1.0381	0.307873	0.289877	-0.517176	0.522409	-2.46531
F1S424	Dual specificity protein kinase CLK4 OS	-0.166757	0.351456	-0.227491	-0.379272	-0.041866	0.041866	0.24155	0.424586	-0.399418	-0.079295	-0.536471	0.181029	1.29964	0.387178	0.907099	-1.8696
F1SAR7	Uncharacterized protein OS	-1.02067	0.470703	-0.273238	0.0098973	0.275701	0.526737	0.408968	0.497914	-0.83538	-0.919282	-1.31809	-0.0098973	0.537268	-0.194461	0.520381	-2.15323
F1SJH5	Uncharacterized protein OS	0.307233	1.0822	-0.509715	-0.224015	0.723588	0.623347	-0.191975	0.277925	-1.23742	-1.24901	-1.02994	-0.28037	0.83937	0.191975	1.21254	-0.97438
F1STY9	Uncharacterized protein OS	-1.56142	0.370234	-1.1849	-0.163634	0.275828	0.312717	0.30765	0.342753	-1.06175	-1.31642	-0.997623	0.251756	0.163634	-1.03318	0.249644	-3.0153
F1RVI1	Uncharacterized protein OS	-2.02219	0.111322	-0.839518	0.384944	0.0276826	0.695451	0.336569	0.297546	-0.58943	-0.863889	-1.93182	-0.0276826	0.219665	-0.411849	0.221983	-2.53754
A0A286ZU72	Caseinolytic peptidase B protein homolog isoform X2 OS	-0.550775	0.0491601	-0.520984	-0.104893	-0.0491601	0.33518	0.166274	0.595303	-0.612269	-0.504233	-1.02208	0.222705	0.0924792	0.0519946	0.388853	-1.71694
A0A286ZRL1	ATP-dependent Clp protease proteolytic subunit OS	-0.623388	0.0416659	-0.213322	0.00930783	0.113578	0.26664	0.0692255	0.42114	-0.767081	-0.393451	-0.510968	-0.00930783	0.314636	-0.594991	0.0623849	-1.18863
A0A286ZY44	Uncharacterized protein OS	-1.51516	0.524991	-0.957342	-0.13749	0.289063	0.599788	0.42809	0.528807	-0.756292	-0.808952	-1.05377	0.23944	0.13749	-0.366502	0.592553	-3.44175
A0A287ADU8	ATP-dependent Clp protease ATP-binding subunit clpX-like, mitochondrial OS	-0.362165	0.4415	-0.665852	-0.0146669	0.21816	0.548821	0.10213	0.674088	-0.796514	-0.234981	-0.896433	0.0146669	0.837656	-0.643975	0.313176	-1.96711
I3LIF2	Uncharacterized protein OS	-0.132399	0.153303	-0.0152511	0.576887	-0.139101	0.43744	0.0152511	0.482891	0.124213	0.279292	-0.117431	0.374128	-0.584119	-0.501911	-0.409882	-2.9431
A0A287BFJ2	Clathrin light chain OS	-1.18756	0.0603751	-0.636379	-0.0146621	0.0391274	0.435855	0.248619	0.620756	0.0146621	-0.530929	-0.485059	0.118256	-0.442594	-0.0829047	0.138377	-2.61153
A0A287BG47	Clathrin light chain OS	-1.58377	0.297174	-0.938203	-0.147467	0.327871	0.809677	0.549178	0.990036	-0.172311	-0.523166	-0.821323	0.331662	-0.309278	0.147467	0.237795	-2.46062
F1S398	Clathrin light chain OS	0.078639	-0.050137	0.187868	0.032522	0.47327	0.443369	0.230805	0.34572	-0.217185	-0.534147	-0.354888	0.365786	-0.201353	-0.032522	-0.069766	-2.73034
C0MHR2	Clathrin heavy chain OS	-0.761632	0.507378	-0.637253	-0.363273	0.083906	0.626204	0.536891	0.756391	-1.02135	-0.707389	-0.959814	-0.083906	0.581149	0.130815	0.74768	-0.855844
A0A286ZI28	Collectrin OS	-0.45844	0.477195	-0.186489	-0.189912	0.186489	0.435597	0.281001	0.226838	-0.58566	-0.647845	-0.933174	0.1957	0.199629	-0.252952	0.343894	-1.76803
K7GND8	Clusterin OS	-0.594481	0.0575965	-0.637954	-0.172767	0.368925	0.474761	0.275358	0.22468	-0.178773	-0.59716	-0.629702	0.107811	-0.0575965	1.37918	1.00557	-1.89384
I3LL21	Uncharacterized protein OS	-1.81306	-0.215179	-1.35963	-0.475786	-0.0314115	0.12664	0.0689945	0.272447	0.0314115	-0.227006	-0.138292	0.409512	0.495848	0.0438105	0.359375	-2.53411
A0A286ZPZ5	Clustered mitochondria protein homolog OS	-1.25056	0.175316	-0.996479	0.090654	-0.00492395	0.939678	0.343302	0.635427	-1.07729	-1.39477	-2.10124	-0.00774995	0.0612918	0.00492395	0.456303	-2.22732
F1RP25	Citramalyl-CoA lyase, mitochondrial isoform X1 OS	-0.91637	0.191904	-0.417651	0.02553	0.328791	0.515727	0.210745	0.751815	-0.520438	-0.421791	-0.679859	-0.02553	0.437905	-0.31784	0.365286	-1.72008
A0A287BS35	Uncharacterized protein OS	-0.99444	0.406874	-0.87724	-0.429975	0.119798	0.444099	0.347271	0.769579	-1.27363	-1.16477	-1.13613	0.0822067	-0.0822067	0.335815	0.914375	-1.14324
A0A287A6V9	Carboxymethylenebutenolidase homolog OS	-0.710883	0.144316	-0.747742	-0.280333	0.552151	0.799394	0.208946	0.915924	-0.452188	0.278681	-0.534906	0.018263	0.126969	-0.816	-0.018263	-0.785568
A0A287AVN5	COX assembly mitochondrial protein OS	-0.396077	0.0569882	-0.312245	-0.0569882	0.173735	0.53122	0.316014	0.713698	-0.763941	-0.61539	-0.4677	0.133014	0.759621	-1.03123	0.272717	-1.16141
A0A287A7G0	COX assembly mitochondrial protein OS	-1.7158	0.0639407	-0.889236	-0.0639407	0.222185	0.59299	0.497555	0.987866	-0.423119	-0.283365	-0.720482	0.102844	0.284195	-0.715805	0.149723	-2.37993
A0A2C9F3A4	UMP-CMP kinase OS	-0.664516	0.580887	-1.22703	-0.491637	0.483355	0.872638	0.62946	1.2068	-0.920121	-0.213336	-0.397937	0.213336	0.274314	-1.14675	0.654214	-2.19208
F1S9L3	Thymidylate_kin domain-containing protein OS	-0.062842	0.367356	-0.750427	-0.439999	0.136139	0.250936	0.017832	0.563296	-0.1465	0.280599	-0.34634	-0.017832	0.318793	-0.233402	0.621355	-1.43561
F1SKY0	Protein CMSS1 isoform 1 OS	-1.63105	0.314744	-0.868257	-0.264034	0.218606	0.387317	0.33486	0.238818	-0.807287	-0.218606	-0.437697	0.290006	1.20385	-0.738147	0.498894	-1.93588
A0A286ZIP7	CKLF-like MARVEL transmembrane domain-containing protein 4 isoform 1 OS	-2.30837	1.29073	-1.1524	-0.239059	0.847607	1.12817	1.2728	1.46367	-0.946187	-0.596477	-1.07345	0.298236	0.45219	-0.447237	0.239059	-3.17206
F1RVS1	Uncharacterized protein OS	0.297915	-0.271324	-0.151342	0.747128	0.0372495	0.938446	0.336909	-0.0372495	-1.2831	-0.972257	-1.9979	0.0404035	0.95023	-0.351718	0.892942	-2.1123
A0A287B975	Uncharacterized protein OS	-0.683066	0.868237	-1.7044	-0.56689	0.573907	0.831659	0.167282	1.84902	-1.47239	0.336461	-0.330613	-0.167282	1.1823	-0.783247	0.581481	-1.27258
[truncated: 6,046 more rows]

## Sheet:  Table S6
T: Accession	T: Description	-Log Student's T-test p-value RIC_CONTROL	Student's T-test Difference RIC_CONTROL	Non-RIC 1	RIC 1	Non-RIC 2	RIC 2	Non-RIC 3	RIC 3	Non-RIC 4	RIC 4	Non-RIC 5	RIC 5	Non-RIC 6	RIC 6	Non-RIC 7	RIC 7	Non-RIC 8	RIC 8
[truncated: 252 more rows]

[truncated: 1 more sheets:  Table S7]
